# Supplementary material for: Asymmetric construction of phosphono dihydropyranones from α-ketophosphonates enabled by Pd/chiral isothiourea relay catalysis
Source: Royal Society of Chemistry journal article supplement (doi:10.1039/d3ob01267k), 2023-01-01
Supplement: d3ob01267k1.pdf [file d3ob01267k1.pdf]

## *Supporting Information*

### **Asymmetric Construction of Phosphono Dihydropyranones from $\alpha$ -Ketophosphonates Enabled by Pd/Chiral Isothiourea Relay Catalysis**

Mostafa Sayed<sup>1,2</sup>, Zhipeng Shi<sup>1</sup>, Zhi-Yong Han<sup>1\*</sup>, Liu-Zhu Gong<sup>1\*</sup>

[1] Hefei National Laboratory for Physical Sciences at the Microscale and Department of Chemistry, University of Science and Technology of China, Hefei 230026, China.

[2] Chemistry Department, Faculty of Science, New Valley University, El-Kharja 72511, Egypt.

#### **General Information**

All reagents were obtained from commercial sources and were used without further purification. Room temperature (rt) refers to 20–25 °C. Analytical thin layer chromatography was performed on pre-coated silica gel plates (Kieselgel 60 F254 silica). TLC visualization was carried out with ultraviolet light (254 nm), followed by staining with a 1% aqueous KMnO<sub>4</sub> solution followed by heating. Flash column chromatography was performed on Kieselgel 60 silica in the solvent system stated. <sup>1</sup>H, <sup>13</sup>C, <sup>19</sup>F and <sup>31</sup>P nuclear magnetic resonance (NMR) spectra were acquired on a Bruker-400 MHz and 500 MHz at ambient temperature in the deuterated solvent stated spectrometer. Chemical shifts( $\delta$ ) are given in ppm relative to TMS. The residual solvent signals were used as references and the chemical shifts converted to the TMS scale (CDCl<sub>3</sub>:  $\delta$ H = 7.26 ppm,  $\delta$ C = 77.16 ppm). The high-resolution mass spectra (HRMS) were recorded on a Thermo LTQ Orbitrap XL (ESI+) or a P-SIMS-Gly of Bruker Daltonics Inc (EI+). All coupling constants, J, are quoted in Hz and determined by analysis using MestReNova software. Multiplicities are indicated by: s (singlet), d (doublet), t (triplet), q (quartet), m (multiplet), dd (doublet of doublets), ddd (doublet of doublet of doublets), dddd (doublet of doublet of doublet of doublets), dt (doublet of triplets) and td (triplet of doublets). The abbreviation Ar is used to denote aromatic, br. to denote broad and app. to denote apparent. HPLC analyses were obtained on a Shimadzu HPLC. All chiral HPLC traces were compared with an authentic racemic trace prepared using racemic HBTM-2.1. Mass spectrometry (m/z) data were acquired by electrospray ionization (ESI). All phosphate esters were synthesized according to the literature<sup>1</sup> with some modifications.

## 1. Additional data for optimization of the reaction condition

**Table S1.** Evaluation of Lewis Base Organocatalysts<sup>a</sup>

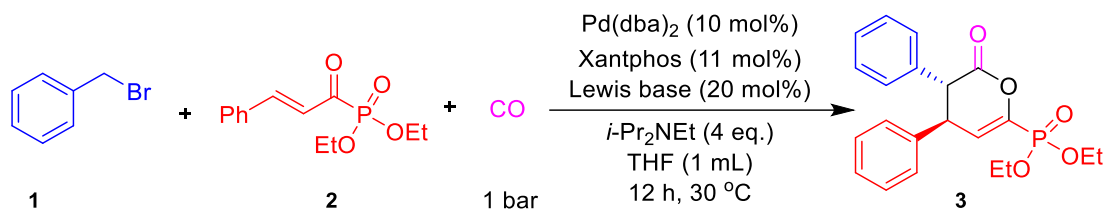

| Entry     | Lewis Base | Yield (%) <sup>b</sup> | d.r. <sup>c</sup> | ee (%) <sup>d</sup> |
|-----------|------------|------------------------|-------------------|---------------------|
| 1         | <b>4a</b>  | 45                     | 13:1              | 63                  |
| 2         | <b>4b</b>  | 80                     | 13:1              | 35                  |
| 3         | <b>4c</b>  | 35                     | >20:1             | 26                  |
| 4         | <b>4d</b>  | 85                     | 13:1              | 4                   |
| 5         | <b>4e</b>  | 20                     | 14:1              | 44                  |
| 6         | <b>4f</b>  | 40                     | 11:1              | 58                  |
| 7         | <b>4h</b>  | 60                     | 12:1              | 55                  |
| 8         | <b>4i</b>  | 80                     | 13:1              | 10                  |
| 9         | <b>4g</b>  | 60                     | 9:1               | 20                  |
| 10        | <b>4j</b>  | 60                     | 7:1               | 4                   |
| <b>11</b> | <b>4k</b>  | <b>70</b>              | <b>&gt;20:1</b>   | <b>90</b>           |

<sup>a</sup>Unless noted otherwise, the reaction of **1** (0.225 mmol) and **2** (0.1 mmol), was carried out in THF (1.0 mL) at 30 °C in the presence of Pd(dba)<sub>2</sub> (10 mol %), XantPhos (11 mol %) and isothioureia catalyst (BTM) **4** (20 mol %), *i*-Pr<sub>2</sub>NEt (4 equiv). <sup>b</sup>NMR yield. <sup>c</sup>The d.r. value was determined by 1H NMR analysis of the crude reaction mixture. <sup>d</sup>The *ee* was determined by HPLC of the pure product.

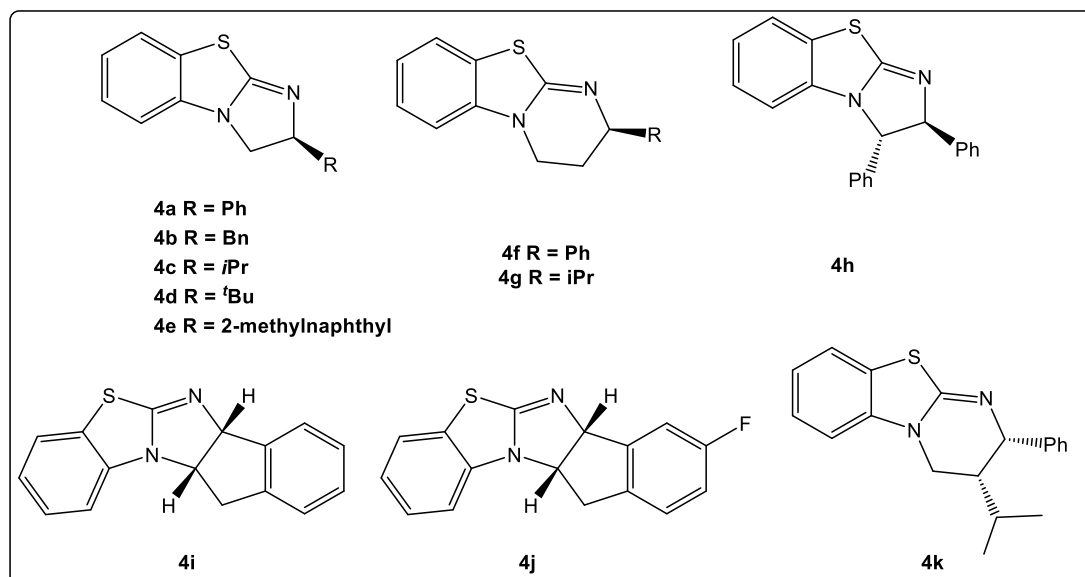

**Table S2.** Evaluation of Pd catalysts<sup>a</sup>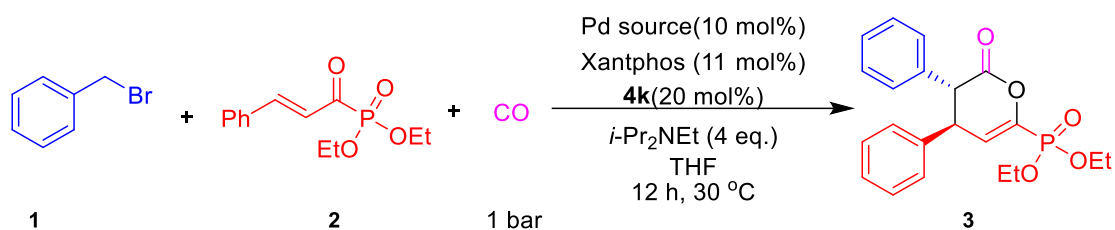

| Entry | Pd Source                  | Yield (%) <sup>b</sup> | d.r. <sup>c</sup> | ee (%) <sup>d</sup> |
|-------|----------------------------|------------------------|-------------------|---------------------|
| 1     | Pd(OAc) <sub>2</sub>       | 30                     | 9:1               | 83                  |
| 2     | PdCl <sub>2</sub>          | 32                     | 10:1              | 91                  |
| 3     | [Pd(allyl)Cl] <sub>2</sub> | 60                     | 11:1              | 90                  |
| 4     | Pd(TFA) <sub>2</sub>       | 30                     | 11:1              | 84                  |

<sup>a</sup>Unless noted otherwise, the reaction of **1** (0.225 mmol) and **2** (0.1 mmol), was carried out in THF (1.0 mL) at 30 °C in the presence of Pd catalyst (10 mol %), XantPhos (11 mol %) and isothioureia catalyst (BTM) **4k** (20 mol %), *i*-Pr<sub>2</sub>NEt (4 equiv). <sup>b</sup>NMR yield. <sup>c</sup>The d.r. value was determined by 1H NMR analysis of the crude reaction mixture. <sup>d</sup>The ee was determined by HPLC of the pure product.

**Table S3.** Evaluation of Phosphine Ligands<sup>a</sup>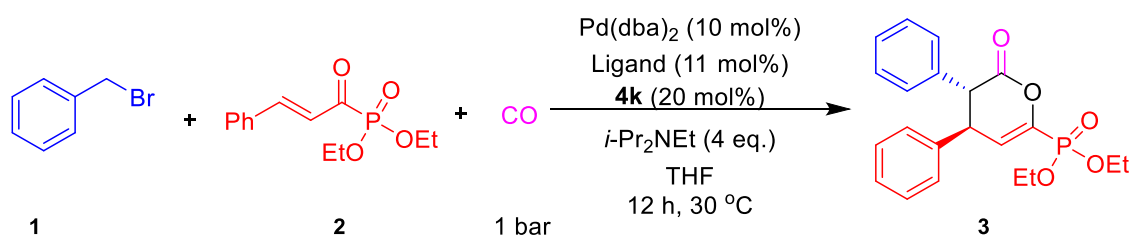

| Entry | Ligand                   | Yield (%) <sup>b</sup> | d.r. <sup>c</sup> | ee (%) <sup>d</sup> |
|-------|--------------------------|------------------------|-------------------|---------------------|
| 1     | Ph <sub>3</sub> P        | traces                 | -                 | -                   |
| 2     | (2-furyl) <sub>3</sub> P | 22                     | 8:1               | 80                  |
| 3     | DEPhos                   | 45                     | 9:1               | 86                  |
| 4     | DPPP                     | traces                 | -                 | -                   |
| 5     | DPPB                     | traces                 | -                 | -                   |
| 6     | DPPF                     | traces                 | -                 | -                   |

<sup>a</sup>Unless noted otherwise, the reaction of **1** (0.225 mmol) and **2** (0.1 mmol), was carried out in THF (1.0 mL) at 30 °C in the presence of Pd(dba)<sub>2</sub> (10 mol %), ligand (11 mol %) and isothioureia (BTM) catalyst **4k** (20 mol %), *i*-Pr<sub>2</sub>NEt (4 equiv). <sup>b</sup>NMR yield. <sup>c</sup>The d.r. value was determined by 1H NMR analysis of the crude reaction mixture. <sup>d</sup>The ee was determined by HPLC of the pure product.

**Table S4.** Evaluation of Solvent<sup>a</sup>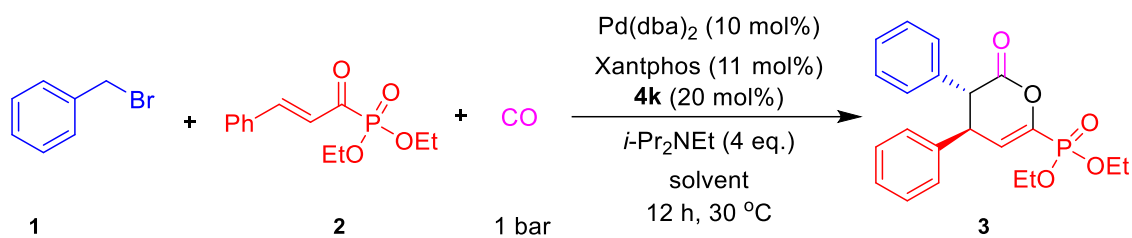

| Entry | Solvent                    | Yield (%) <sup>b</sup> | d.r. <sup>c</sup> | ee (%) <sup>d</sup> |
|-------|----------------------------|------------------------|-------------------|---------------------|
| 1     | <i>i</i> Pr <sub>2</sub> O | 20                     | 12:1              | 50                  |
| 2     | 2-Me-THF                   | 40                     | 12:1              | 90                  |
| 3     | MTBE                       | 36                     | 9:1               | 79                  |
| 4     | Toluene                    | 45                     | 9:1               | 73                  |

<sup>a</sup>Unless noted otherwise, the reaction of **1** (0.225 mmol) and **2** (0.1 mmol), was carried out in THF (1.0 mL) at 30 °C in the presence of Pd(dba)<sub>2</sub> (10 mol %), XantPhos (11 mol %) and isothiurea (BTM) catalyst **4k** (20 mol %), *i*-Pr<sub>2</sub>NEt (4 equiv). <sup>b</sup>NMR yield. <sup>c</sup>The d.r. value was determined by 1H NMR analysis of the crude reaction mixture. <sup>d</sup>The *ee* was determined by HPLC of the pure product.

**Table S5.** Evaluation of CO Pressure<sup>a</sup>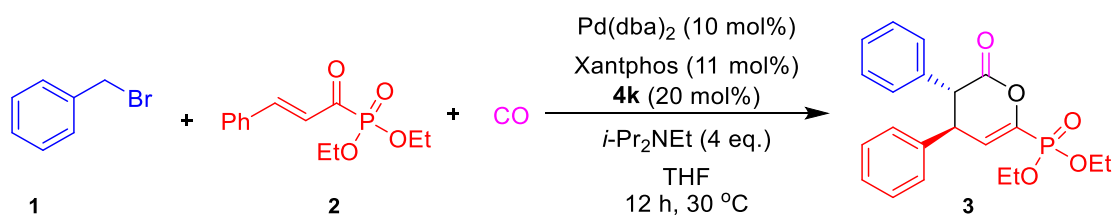

| Entry    | CO Pressure | Yield (%) <sup>b</sup> | d.r. <sup>c</sup> | ee (%) <sup>d</sup> |
|----------|-------------|------------------------|-------------------|---------------------|
| <b>1</b> | 2           | traces                 | -                 | -                   |
| <b>2</b> | 3           | N.D                    | -                 | -                   |
| <b>3</b> | 4           | N.D                    | -                 | -                   |

<sup>a</sup>Unless noted otherwise, the reaction of **1** (0.225 mmol) and **2** (0.1 mmol), was carried out in THF (1.0 mL) at 30 °C in the presence of Pd(dba)<sub>2</sub> (10 mol %), Xantphos (11 mol %) and benzotetramisole (BTM) catalyst **4k** (20 mol %), *i*-Pr<sub>2</sub>NEt (4 equiv). <sup>b</sup>NMR yield. <sup>c</sup>The d.r. value was determined by 1H NMR analysis of the crude reaction mixture. <sup>d</sup>The *ee* was determined by HPLC of the pure product.

**Scheme S1.** Unsuccessful examples of benzyl bromides and  $\alpha$ -ketophosphonates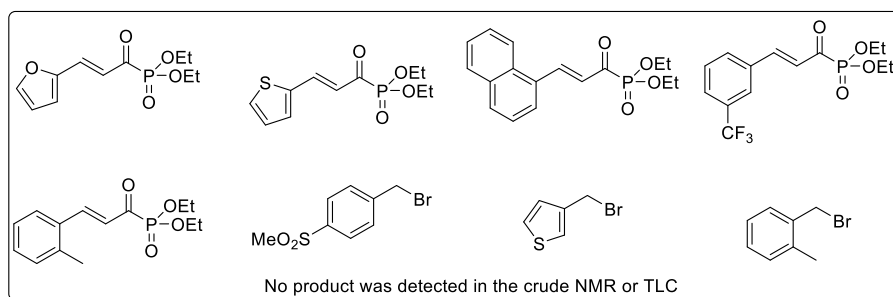

## 2. Determining the absolute configuration of the products:

In previous work<sup>2</sup>, the absolute configuration of **3h** was determined to be 3R, 4S. Through comparison of the HPLC data, **3h** in our case could also be determined as 3R, 4S. Reference HPLC data (CHIRALPAK AD-H, hexane/isopropanol = 90/10, 1 mL/min, 220 nm) tR (3R,4S): 30.4 min, tR (3S,4R) 33.6 min. Our HPLC data of **3j** (CHIRALPAK AD-H, hexane/isopropanol = 90/10, flow rate 1.0 mL/min, 220 nm, tR= 28.4 min (minor), tR= 31.7 min (major).

## 3. 1.0 Mmol scale reaction:

To a flame-dried and Ar-purged Schlenk tube (100 mL) were added Pd(dba)<sub>2</sub> (0.1 mmol, 58 mg), Xantphos (0.11 mmol, 64 mg), **4k** (0.2 mmol, 62 mg) and a stirring bar. The Schlenk tube was then evacuated and filled back with argon. This cycle was repeated three times and followed by addition of 2-(bromomethyl) naphthalene (2.25 mmol, 495 mg), solution of diethyl (E)-(3-(*p*-tolyl)acryloyl)phosphonate (1 mmol, 282 mg) in THF (10 mL), and *i*-Pr<sub>2</sub>NEt (4 mmol, 517 mg). The solution was frozen under liquid nitrogen, the nitrogen atmosphere was evacuated from the tube in a Schlenk line and then was filled with 1 bar CO, then was stirred under CO atmosphere at 30 °C for 12 h. The reaction was directly purified by flash column chromatography on silica gel to give **3n**. The d.r. was determined by <sup>1</sup>H NMR analysis of the crude product. Then the reaction was directly purified through flash column chromatography on silica gel (PE: EA = 2:1) to give **3n** as a yellow oil, 360 mg, Yield: 80%. Enantiomeric excess: 94%, > 20:1 d.r.

## 4. Synthesis of substrates

### 4.1. General Procedure for the Synthesis of Allyl Alcohols<sup>3</sup>.

To a stirred solution of requisite aldehyde (10 mmol) in dichloromethane, diethylphosphite (10 mmol) was added, then triethyl amine (10 mmol) was added dropwise. The resulting solution was stirred at r.t. for 72 h before dilution with HCl (1 M) and the reaction was washed with H<sub>2</sub>O, saturated aqueous NaHCO<sub>3</sub>, and brine. The organic layer was dried over MgSO<sub>4</sub> and concentrated in vacuo to give the crude product.

### 4.2. General Procedure for Synthesis of Phosphonate Ester.

A solution of the requisite allylic alcohol (1.0 equiv.) in CH<sub>2</sub>Cl<sub>2</sub> at -10 °C was added a saturated solution of SO<sub>3</sub>.pyridine (3.0 equiv.) in DMSO and *i*-Pr<sub>2</sub>NEt (3.0 equiv.) and the reaction stirred at -10 °C until complete by TLC (warming to rt if necessary). Upon completion the reaction was diluted with Et<sub>2</sub>O and washed consecutively with H<sub>2</sub>O, saturated aqueous NaHCO<sub>3</sub>, saturated aqueous Na<sub>2</sub>SO<sub>4</sub>

and brine. The ethereal solution was dried over MgSO<sub>4</sub> and concentrated in vacuo to give the crude product.

### 5. General procedure for the synthesis of the products 3a-3n

To a flame-dried and Ar-purged Schlenk tube (25 mL) were added Pd(dba)<sub>2</sub> (0.01 mmol, 5.8 mg), Xantphos (0.011 mmol, 6.4 mg), **4k** (0.02 mmol, 6.2 mg) and a stirring bar. The Schlenk tube was then evacuated and filled back with argon. This cycle was repeated three times and followed by addition of benzyl bromide derivative **1** (0.225 mmol), solution of  $\alpha$ -Ketophosphonates **2** (0.1 mmol) in THF (1 mL), and *i*-Pr<sub>2</sub>NEt (0.4 mmol, 51.7 mg). The solution was frozen under liquid nitrogen, the nitrogen atmosphere was evacuated from the tube in a Schlenk line and then was filled with 1 bar CO, then was stirred under CO atmosphere at 30 °C for 12 h. The reaction was directly purified by flash column chromatography on silica gel to give the pure product **3**.

### 6. General procedure for the synthesis of the products 4a-4h

To a flame-dried and Ar-purged Schlenk tube (25 mL) were added Pd(dba)<sub>2</sub> (0.01 mmol, 5.8 mg), Xantphos (0.011 mmol, 6.4 mg), **4k** (0.02 mmol, 6.2 mg) and a stirring bar. The Schlenk tube was then evacuated and filled back with argon. This cycle was repeated three times and followed by addition of benzyl bromide derivative **1** (0.225 mmol), solution of  $\alpha$ -Ketophosphonates **2** (0.1 mmol) in THF (1 mL), and *i*-Pr<sub>2</sub>NEt (0.4 mmol, 51.7 mg). The solution was frozen under liquid nitrogen, the nitrogen atmosphere was evacuated from the tube in a Schlenk line and then was filled with 1 bar CO. The solution then was stirred under CO atmosphere at 30 °C for 12 h. After that, the tube was opened to release CO and 1 mL MeOH was added to the reaction mixture, then the reaction was allowed to stir at the same temperature for additional 24 h. After the reaction was completed, the solvent was removed, and the residue was purified by column chromatography to give the pure product **4**.

### 7. Characterization of allyl alcohols

#### *Dimethyl (E)-(1-hydroxy-3-phenylallyl)phosphonate*

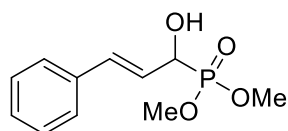

**<sup>1</sup>H NMR** (400 MHz, CDCl<sub>3</sub>)  $\delta$  7.41 (m, 2H), 7.32 (m, 2H), 7.28 – 7.24 (m, 1H), 6.80 (ddd, *J* = 15.9, 4.9, 1.6 Hz, 1H), 6.33 (dt, *J* = 15.9, 5.8 Hz, 1H), 4.89 (s, 1H), 4.73 (ddd, *J* = 12.9, 6.2, 1.7 Hz, 1H), 3.83 (d, *J* = 10.4 Hz, 6H). **<sup>13</sup>C NMR** (126 MHz, CDCl<sub>3</sub>)  $\delta$  136.30, 136.28, 132.63, 132.52, 128.60, 127.97, 126.70, 126.68, 123.58, 123.54, 69.86, 68.57, 54.08, 54.02, 53.80, 53.74. **HRMS** (ESI) *m/z* (*M*+*Na*)<sup>+</sup> calculated for C<sub>11</sub>H<sub>15</sub>O<sub>4</sub>PNa: 265.0606, found: 265.0602.

#### *Diethyl (E)-(1-hydroxy-3-phenylallyl)phosphonate*

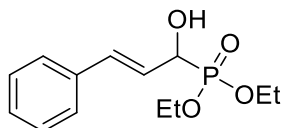

**<sup>1</sup>H NMR** (400 MHz, CDCl<sub>3</sub>) δ 7.40 (m, 2H), 7.31 (m, 2H), 7.26 (m, 1H), 6.79 (dd, *J* = 16.0, 4.9 Hz, 1H), 6.46 – 6.22 (m, 1H), 4.69 (ddd, *J* = 13.0, 6.2, 1.6 Hz, 1H), 4.52 (s, 1H), 4.19 (p, *J* = 7.4 Hz, 4H), 1.33 (qd, *J* = 7.1, 1.4 Hz, 6H). **<sup>13</sup>C NMR** (126 MHz, CDCl<sub>3</sub>) δ 136.47, 136.45, 132.32, 132.22, 128.57, 127.85, 126.65, 126.63, 123.96, 123.93, 70.10, 68.81, 63.40, 63.35, 63.16, 63.10, 16.55, 16.51. **HRMS** (ESI) *m/z* (M+Na)<sup>+</sup> calculated for C<sub>13</sub>H<sub>19</sub>O<sub>4</sub>PNa: 293.0919, found: 293.0915.

***Diethyl (E)-3-(4-methoxyphenyl)-1-hydroxyallylphosphonate***

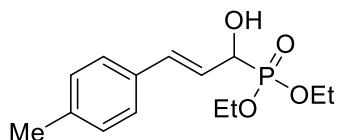

**<sup>1</sup>H NMR** (500 MHz, CDCl<sub>3</sub>) δ 7.30 (d, *J* = 7.9 Hz, 2H), 7.13 (d, *J* = 7.8 Hz, 2H), 6.74 (ddd, *J* = 15.9, 4.9, 1.6 Hz, 1H), 6.27 (ddd, *J* = 15.9, 6.4, 5.3 Hz, 1H), 4.66 (ddd, *J* = 12.5, 6.4, 1.7 Hz, 1H), 4.26 – 4.12 (m, 4H), 2.34 (s, 3H), 1.33 (q, *J* = 7.0 Hz, 6H). **<sup>13</sup>C NMR** (126 MHz, CDCl<sub>3</sub>) δ 137.85, 133.57, 133.55, 132.54, 132.44, 129.29, 126.59, 126.58, 122.58, 122.54, 70.23, 68.95, 63.39, 63.33, 63.25, 63.19, 21.26, 16.56, 16.52. **HRMS** (ESI) *m/z* (M+Na)<sup>+</sup> calculated for C<sub>14</sub>H<sub>21</sub>O<sub>4</sub>PNa: 307.1070, found: 307.1076

***Diethyl (E)-3-(4-bromophenyl)-1-hydroxyallylphosphonate***

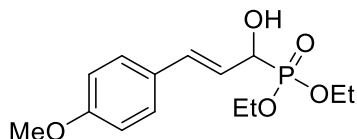

**<sup>1</sup>H NMR** (500 MHz, CDCl<sub>3</sub>) δ 7.33 (d, *J* = 8.5 Hz, 2H), 6.87 – 6.80 (m, 2H), 6.71 (ddd, *J* = 15.9, 4.8, 1.5 Hz, 1H), 6.18 (dt, *J* = 15.9, 6.0 Hz, 1H), 4.64 (ddd, *J* = 12.2, 6.5, 1.6 Hz, 1H), 4.22 – 4.12 (m, 3H), 3.80 (s, 3H), 1.32 (q, *J* = 7.4 Hz, 6H). **<sup>13</sup>C NMR** (126 MHz, CDCl<sub>3</sub>) δ 159.42, 132.17, 132.06, 129.21, 129.19, 127.89, 127.88, 121.55, 121.52, 113.96, 70.23, 68.95, 63.33, 63.28, 63.16, 63.11, 55.29, 16.55, 16.51. **HRMS** (ESI) *m/z* (M+H)<sup>+</sup> calculated for C<sub>14</sub>H<sub>22</sub>O<sub>5</sub>P: 301.1205, found: 301.1206

***Diethyl (E)-3-(4-fluorophenyl)-1-hydroxyallylphosphonate***

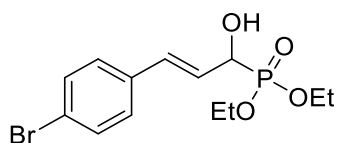

**<sup>1</sup>H NMR** (400 MHz, CDCl<sub>3</sub>) δ 7.43 (d, *J* = 8.1 Hz, 2H), 7.25 (d, *J* = 8.2 Hz, 2H), 6.73 (ddd, *J* = 16.0, 5.0, 1.6 Hz, 1H), 6.32 (dt, *J* = 15.9, 5.5 Hz, 1H), 4.67 (ddd, *J* = 13.5, 5.9, 1.7 Hz, 1H), 4.55 (s, 1H), 4.19 (p, *J* = 7.2 Hz, 4H), 1.33 (q, *J* = 7.3 Hz, 6H). **<sup>13</sup>C NMR** (101 MHz, CDCl<sub>3</sub>) δ 135.39, 135.36, 131.69, 130.96, 130.83, 128.13, 128.11, 124.76, 124.72, 121.67, 121.65, 70.10, 68.50, 63.43, 63.36, 63.20, 63.13, 16.55, 16.50. **HRMS** (ESI) *m/z* (M+Na)<sup>+</sup> calculated for C<sub>13</sub>H<sub>18</sub>BrO<sub>4</sub>PNa: 371.0024, found: 371.0021.

***Diethyl (E)-3-(4-tolyl)-1-hydroxyallylphosphonate***

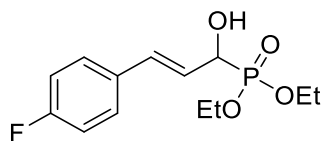

**<sup>1</sup>H NMR** (400 MHz, CDCl<sub>3</sub>) δ 7.31 (d, *J* = 8.3, 2H), 7.26 (d, *J* = 8.2 Hz, 2H), 6.75 (dd, *J* = 16.0, 5.0 Hz, 1H), 6.31 (dt, *J* = 16.0, 5.5 Hz, 1H), 5.53 (broad s, 1H), 4.69 (ddd, *J* = 13.9, 5.9, 1.8 Hz, 1H), 4.23 – 4.15 (m, 4H), 1.32 (q, *J* = 7.4 Hz, 6H). **<sup>19</sup>F NMR** (471 MHz, CDCl<sub>3</sub>) δ -113.80. **HRMS** (ESI) *m/z* (M+H)<sup>+</sup> calculated for C<sub>13</sub>H<sub>19</sub>FO<sub>4</sub>P: 289.1005, found: 289.1002.

***Diethyl (E)-(3-(2-chlorophenyl)-1-hydroxyallyl)phosphonate***

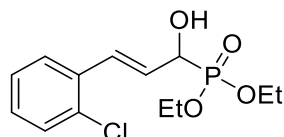

**<sup>1</sup>H NMR** (400 MHz, CDCl<sub>3</sub>) δ 7.52 (dd, *J* = 7.3, 2.1 Hz, 1H), 7.32 (dd, *J* = 7.3, 2.0 Hz, 1H), 7.19 (dd, *J* = 6.9, 2.1 Hz, 2H), 7.17 – 7.12 (m, 1H), 6.30 (ddd, *J* = 15.9, 6.1, 5.0 Hz, 1H), 5.68 (s, 1H), 4.72 (ddd, *J* = 13.3, 6.1, 1.8 Hz, 1H), 4.27 – 4.07 (m, 4H), 1.32 (td, *J* = 7.1, 5.2 Hz, 6H). **<sup>13</sup>C NMR** (101 MHz, CDCl<sub>3</sub>) δ 134.73, 134.70, 133.20, 133.18, 129.66, 128.81, 128.50, 128.37, 127.10, 127.08, 127.06, 126.84, 77.40, 77.08, 76.77, 70.23, 68.63, 63.64, 63.57, 63.27, 63.20, 16.51, 16.46. **HRMS** (ESI) *m/z* (M+Na)<sup>+</sup> calculated for C<sub>13</sub>H<sub>18</sub>ClO<sub>4</sub>PNa: 327.0523, found: 327.0532

***Diethyl (E)-(3-(2-bromophenyl)-1-hydroxyallyl)phosphonate***

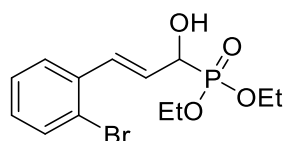

**<sup>1</sup>H NMR** (400 MHz, CDCl<sub>3</sub>) δ 7.37 (s, 1H), 7.27 – 7.20 (m, 3H), 6.75 (ddd, *J* = 16.0, 5.0, 1.7 Hz, 1H), 6.34 (dt, *J* = 15.9, 5.3 Hz, 1H), 5.95 (d, *J* = 5.5 Hz, 1H), 4.71 (ddd, *J* = 14.0, 5.8, 1.8 Hz, 1H), 4.20 (p, *J* = 7.0 Hz, 4H), 1.33 (dt, *J* = 9.0, 7.0 Hz, 6H). **<sup>13</sup>C NMR** (101 MHz, CDCl<sub>3</sub>) δ 138.40, 138.37, 134.46, 130.61, 130.48, 129.78, 127.69, 127.68, 126.43, 126.41, 125.66, 125.62, 124.84, 124.82, 69.90, 68.30, 63.58, 63.50, 63.27, 63.20, 16.52, 16.47. **HRMS** (ESI) *m/z* (M+H)<sup>+</sup> calculated for C<sub>13</sub>H<sub>19</sub>BrO<sub>4</sub>P: 349.0204, found: 349.0204.

***Diethyl (E)-(1-hydroxy-3-(2-methoxyphenyl)allyl)phosphonate***

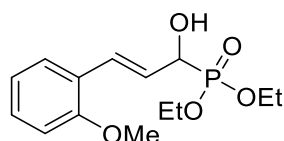

**<sup>1</sup>H NMR** (400 MHz, CDCl<sub>3</sub>) δ 7.44 (dd, *J* = 7.6, 1.7 Hz, 1H), 7.23 (ddd, *J* = 7.4, 1.7, 0.8 Hz, 1H), 7.08 (ddd, *J* = 16.1, 4.8, 1.6 Hz, 1H), 6.92 (td, *J* = 7.5, 1.1 Hz, 1H), 6.87 (dd, *J* = 8.2, 1.1 Hz, 1H), 6.35 (ddd, *J* = 16.1, 6.6, 5.3 Hz, 1H), 4.67 (ddd, *J* = 12.4, 6.6, 1.6 Hz, 1H), 4.20 (dq, *J* = 8.0, 7.1 Hz, 4H), 3.84 (s, 3H), 1.34 (td, *J* = 7.1, 2.1 Hz, 6H). **<sup>13</sup>C NMR** (101 MHz, CDCl<sub>3</sub>) δ 156.91, 129.08, 127.95, 127.81, 127.24, 127.22, 125.35, 125.32, 124.21, 124.16, 120.63, 110.88, 70.91, 69.31, 63.24, 63.17, 55.42, 16.54, 16.48. **HRMS** (ESI) *m/z* (M+Na)<sup>+</sup> calculated for C<sub>14</sub>H<sub>21</sub>O<sub>4</sub>PNa: 323.1024, found: 323.1034.

***Diethyl (E)-(3-(2,3-dimethoxyphenyl)-1-hydroxyallyl)phosphonate***



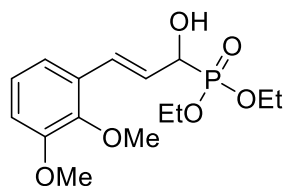

**<sup>1</sup>H NMR** (400 MHz, CDCl<sub>3</sub>) δ 7.10 (t, *J* = 1.9 Hz, 1H), 7.01 (dt, *J* = 8.4, 2.2 Hz, 1H), 6.85 (d, *J* = 8.2 Hz, 1H), 4.96 (d, *J* = 10.1 Hz, 1H), 4.11 – 4.01 (m, 5H), 3.89 (s, 3H), 3.88 (s, 3H), 1.29 (t, *J* = 7.1 Hz, 3H), 1.23 (t, *J* = 7.1 Hz, 3H). **<sup>13</sup>C NMR** (126 MHz, CDCl<sub>3</sub>) δ 148.87, 148.85, 148.81, 148.79, 128.92, 128.90, 119.71, 119.66, 110.73, 110.71, 110.24, 110.20, 71.19, 69.91, 63.31, 63.25, 63.09, 63.03, 55.86, 16.50, 16.45, 16.41. **HRMS** (ESI) *m/z* (M+Na)<sup>+</sup> calculated for C<sub>15</sub>H<sub>23</sub>O<sub>6</sub>PNa: 353.1130, found: 353.1130.

## 8. Characterization of Phosphate ester

### *Diethyl cinnamoylphosphonate*

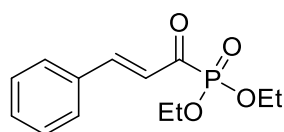

The product was obtained as yellow oil after chromatographic purification (PE:EA= 1:1). **<sup>1</sup>H NMR** (400 MHz, CDCl<sub>3</sub>) δ 8.12 (d, *J* = 16.3 Hz, 1H), 7.63 (dd, *J* = 7.8, 1.8 Hz, 2H), 7.47 – 7.39 (m, 3H), 7.10 (dd, *J* = 16.3, 12.0 Hz, 1H), 4.27 (dq, *J* = 8.1, 7.1 Hz, 4H), 1.40 (t, *J* = 7.1 Hz, 6H). **<sup>13</sup>C NMR** (101 MHz, CDCl<sub>3</sub>) δ 199.45, 197.70, 148.67, 148.65, 133.99, 133.97, 131.73, 129.10, 129.08, 128.89, 128.18, 125.29, 124.64, 63.96, 63.88, 16.45, 16.39. **HRMS** (ESI) *m/z* (M+H)<sup>+</sup> calculated for C<sub>13</sub>H<sub>18</sub>O<sub>4</sub>P: 269.0943, found: 269.0943.

### *Diethyl (E)-(3-(*p*-tolyl)acryloyl)phosphonate*

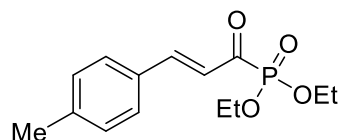

The product was obtained as yellow oil after chromatographic purification (PE:EA= 1:1). **<sup>1</sup>H NMR** (400 MHz, CDCl<sub>3</sub>) δ 8.10 (d, *J* = 16.2 Hz, 1H), 7.53 (d, *J* = 8.2 Hz, 2H), 7.24 (d, *J* = 7.9 Hz, 2H), 7.07 (dd, *J* = 16.2, 12.1 Hz, 1H), 4.26 (dq, *J* = 8.0, 7.1 Hz, 4H), 2.40 (s, 3H), 1.44 – 1.35 (m, 6H). **<sup>13</sup>C NMR** (101 MHz, CDCl<sub>3</sub>) δ 199.32, 197.58, 148.79, 148.77, 142.61, 131.32, 129.88, 129.17, 128.23, 124.42, 123.77, 63.87, 63.80, 21.69, 16.46, 16.40. **HRMS** (ESI) *m/z* (M+H)<sup>+</sup> calculated for C<sub>14</sub>H<sub>20</sub>O<sub>4</sub>P: 283.1104, found: 283.1101.

### *Diethyl (E)-(3-(4-methoxyphenyl)acryloyl)phosphonate*

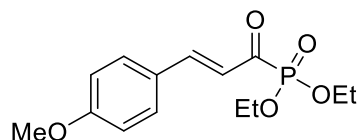

The product was obtained as yellow oil after chromatographic purification (PE:EA= 1:1). **<sup>1</sup>H NMR** (400 MHz, CDCl<sub>3</sub>) δ 8.09 (d, *J* = 16.1 Hz, 1H), 7.60 (d, *J* = 8.8 Hz, 2H), 7.00 (dd, *J* = 16.1, 12.2 Hz, 1H), 6.94 (d, *J* = 8.9 Hz, 2H), 4.25 (dq, *J* = 8.0, 7.0 Hz, 4H), 3.87 (s, 3H), 1.39 (td, *J* = 7.1, 0.5 Hz, 6H). **<sup>13</sup>C NMR** (101 MHz, CDCl<sub>3</sub>) δ 198.86, 197.13, 162.69, 148.57, 148.54, 131.14, 126.74, 126.72, 123.15, 122.49, 114.61, 63.81, 63.74, 55.50, 16.45, 16.40. **HRMS** (ESI) *m/z* (M+Na)<sup>+</sup> calculated for C<sub>14</sub>H<sub>19</sub>O<sub>5</sub>PNa: 321.0873, found: 321.0882.

**Diethyl (E)-(3-(4-bromophenyl)acryloyl)phosphonate**

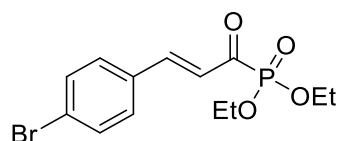

The product was obtained as yellow oil after chromatographic purification (PE:EA= 1:1). **<sup>1</sup>H NMR** (500 MHz, CDCl<sub>3</sub>) δ 8.04 (d, *J* = 16.3 Hz, 1H), 7.60 – 7.54 (m, 2H), 7.49 (d, *J* = 8.6 Hz, 2H), 7.07 (dd, *J* = 16.3, 11.8 Hz, 1H), 4.29 – 4.22 (m, 4H), 1.40 (t, *J* = 7.1 Hz, 6H). **<sup>13</sup>C NMR** (126 MHz, CDCl<sub>3</sub>) δ 199.31, 197.91, 147.10, 147.08, 132.91, 132.90, 132.42, 130.33, 126.25, 125.67, 125.15, 64.01, 63.95, 16.46, 16.41. **HRMS** (ESI) *m/z* (M+H)<sup>+</sup> calculated for C<sub>13</sub>H<sub>17</sub>BrO<sub>4</sub>P: 347.0048, found: 347.0041.

**Diethyl (E)-(3-(4-fluorophenyl)acryloyl)phosphonate**

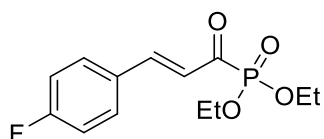

The product was obtained as yellow oil after chromatographic purification (PE:EA= 1:1). **<sup>1</sup>H NMR** (500 MHz, CDCl<sub>3</sub>) δ 8.09 (d, *J* = 16.2 Hz, 1H), 7.64 (dd, *J* = 8.7, 5.5 Hz, 2H), 7.13 (t, *J* = 8.6 Hz, 2H), 7.02 (dd, *J* = 16.2, 11.9 Hz, 1H), 4.30 – 4.21 (m, 4H), 1.40 (t, *J* = 7.1 Hz, 6H). **<sup>13</sup>C NMR** (126 MHz, CDCl<sub>3</sub>) δ 199.16, 197.76, 165.75, 163.73, 147.26, 131.18, 131.11, 130.30, 130.28, 130.26, 125.02, 125.00, 124.49, 124.47, 116.49, 116.31, 63.96, 63.91, 16.45, 16.41. **HRMS** (ESI) *m/z* (M+H)<sup>+</sup> calculated for C<sub>13</sub>H<sub>17</sub>FO<sub>4</sub>P: 287.0843, found: 287.0849. **<sup>19</sup>F NMR** (471 MHz, CDCl<sub>3</sub>) δ -106.81.

**Diethyl (E)-(3-(2-chlorophenyl)acryloyl)phosphonate**

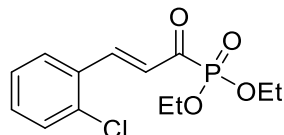

The product was obtained as yellow oil after chromatographic purification (PE:EA= 1:1). **<sup>1</sup>H NMR** (500 MHz, CDCl<sub>3</sub>) δ 8.54 (d, *J* = 16.3 Hz, 1H), 7.72 (dd, *J* = 7.8, 1.6 Hz, 1H), 7.46 (d, *J* = 8.0 Hz, 1H), 7.38 (td, *J* = 7.7, 1.6 Hz, 1H), 7.32 (t, *J* = 7.6 Hz, 1H), 7.06 (dd, *J* = 16.3, 11.8 Hz, 1H), 4.29 (p, *J* = 7.3 Hz, 4H), 1.41 (t, *J* = 7.1 Hz, 6H). **<sup>13</sup>C NMR** (126 MHz, CDCl<sub>3</sub>) δ 199.45, 198.04, 144.13, 144.12, 136.27, 132.33, 132.25, 132.24, 130.42, 127.79, 127.25, 127.15, 126.63, 64.02, 63.96, 16.48, 16.43. **HRMS** (ESI) *m/z* (M+Na)<sup>+</sup> calculated for C<sub>13</sub>H<sub>16</sub>ClO<sub>4</sub>PNa: 325.0377, found: 325.0378.

**Diethyl (E)-(3-(2-bromophenyl)acryloyl)phosphonate**

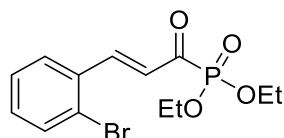

The product was obtained as yellow oil after chromatographic purification (PE:EA= 1:1). **<sup>1</sup>H NMR** (500 MHz, CDCl<sub>3</sub>) δ 8.51 (d, *J* = 16.3 Hz, 1H), 7.67 (ddd, *J* = 22.9, 7.9, 1.5 Hz, 2H), 7.44 – 7.33 (m, 1H), 7.30 (td, *J* = 7.7, 1.7 Hz, 1H), 7.01 (dd, *J* = 16.2, 12.3 Hz, 1H), 4.29 (dq, *J* = 8.2, 7.1 Hz, 4H), 1.42 (t, *J* = 7.1 Hz, 6H). **<sup>13</sup>C NMR** (126 MHz, CDCl<sub>3</sub>) δ 199.41, 198.00, 146.83, 146.81, 133.99, 133.98, 133.71, 132.45, 127.94, 127.87, 127.41, 126.89, 126.75, 64.01, 63.96, 16.49, 16.44. **HRMS** (ESI) *m/z* (M+H)<sup>+</sup> calculated for C<sub>13</sub>H<sub>17</sub>BrO<sub>4</sub>P: 347.0048, found: 347.0048.

**Diethyl (E)-3-(2-methoxyphenyl)acryloyl)phosphonate**

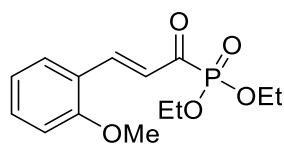

The product was obtained as yellow oil after chromatographic purification (PE:EA= 1:1). **<sup>1</sup>H NMR** (500 MHz, CDCl<sub>3</sub>) δ 8.48 (d, *J* = 16.1 Hz, 1H), 7.71 – 7.57 (m, 1H), 7.34 (td, *J* = 7.4, 1.3 Hz, 1H), 7.30 – 7.19 (m, 3H), 7.02 (dd, *J* = 16.1, 12.7 Hz, 1H), 4.27 (p, *J* = 7.2 Hz, 4H), 2.50 (s, 3H), 1.40 (t, *J* = 7.1 Hz, 7H). **<sup>13</sup>C NMR** (126 MHz, CDCl<sub>3</sub>) δ 199.31, 197.92, 146.42, 146.41, 139.33, 132.85, 132.84, 131.50, 131.10, 126.56, 126.53, 126.06, 125.54, 63.89, 63.84, 19.76, 16.48, 16.44. **HRMS** (ESI) *m/z* (M+Na)<sup>+</sup> calculated for C<sub>14</sub>H<sub>19</sub>O<sub>4</sub>PNa: 305.0923, found: 305.0931.

**Diethyl (E)-3-(2,3-dimethoxyphenyl)acryloyl)phosphonate**

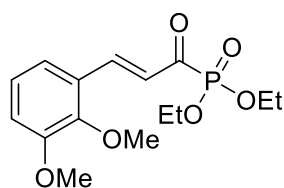

The product was obtained as yellow oil after chromatographic purification (PE:EA= 1:1). **<sup>1</sup>H NMR** (500 MHz, CDCl<sub>3</sub>) δ 8.43 (d, *J* = 16.5 Hz, 1H), 7.24 (dd, *J* = 8.0, 1.4 Hz, 1H), 7.17 – 7.07 (m, 2H), 7.01 (dd, *J* = 8.1, 1.4 Hz, 1H), 4.28 (p, *J* = 7.2 Hz, 4H), 3.91 (s, 3H), 3.89 (s, 3H), 1.41 (t, *J* = 7.1 Hz, 6H). **<sup>13</sup>C NMR** (126 MHz, CDCl<sub>3</sub>) δ 199.53, 198.13, 153.15, 149.49, 143.37, 143.35, 128.16, 128.15, 126.09, 125.57, 124.33, 119.29, 115.29, 63.83, 63.77, 61.62, 55.92, 16.47, 16.42. **HRMS** (ESI) *m/z* (M+H)<sup>+</sup> calculated for C<sub>15</sub>H<sub>22</sub>O<sub>6</sub>P: 329.1154, found: 329.1150.

**Dimethyl cinnamoylphosphonate**

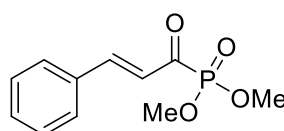

The product was obtained as yellow oil without further purification. **<sup>1</sup>H NMR** (400 MHz, CDCl<sub>3</sub>) δ 8.12 (d, *J* = 16.3 Hz, 1H), 7.69 – 7.57 (m, 2H), 7.53 – 7.35 (m, 3H), 7.08 (dd, *J* = 16.3, 13.0 Hz, 1H), 3.92 (s, 3H), 3.90 (s, 3H). **<sup>13</sup>C NMR** (126 MHz, CDCl<sub>3</sub>) δ 198.55, 197.16, 149.16, 149.15, 133.88, 133.86, 131.87, 129.13, 125.35, 124.82, 54.14, 54.08. **HRMS** (ESI) *m/z* (M+H)<sup>+</sup> calculated for C<sub>11</sub>H<sub>14</sub>O<sub>4</sub>P: 241.0630, found: 241.0628.

**9. Characterization of products 3a-3n**

**Diethyl ((3*R*,4*S*)-2-oxo-3,4-diphenyl-3,4-dihydro-2*H*-pyran-6-yl)phosphonate (3a)**

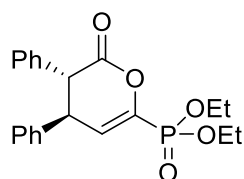

The reaction was directly purified by flash column chromatography (PE:EA= 2:1) on silica gel to give **3a** (yield: 70%, 27 mg, d.r. >20:1, 90% ee) as yellow oil. **<sup>1</sup>H NMR** (400 MHz, CDCl<sub>3</sub>) δ 7.31 – 7.20 (m, 6H), 7.12 (m, 2H), 7.07 – 7.01 (m, 2H), 6.51 (dd, *J* = 10.1, 4.0 Hz, 1H), 4.31 – 4.09 (m, 4H), 4.06 (ddd,

$J = 8.3, 3.9, 2.6$  Hz, 1H), 3.96 (d,  $J = 8.3$  Hz, 1H), 1.42 (t,  $J = 7.1$  Hz, 3H), 1.35 (t,  $J = 7.1$  Hz, 3H).  $^{13}\text{C}$  NMR (101 MHz,  $\text{CDCl}_3$ )  $\delta$  167.22 (d,  $J = 8.4$  Hz), 145.40, 143.10, 138.92, 135.39, 129.05, 128.80, 128.24, 127.99, 127.87, 127.44, 122.40, 122.21, 63.50 (dd,  $J = 11.3, 5.8$  Hz), 52.61, 45.51 (d,  $J = 12.7$  Hz), 29.73, 16.36 (dd,  $J = 9.5, 6.3$  Hz).  $^{31}\text{P}$  NMR (162 MHz,  $\text{CDCl}_3$ )  $\delta$  4.31. HRMS (ESI)  $m/z$  ( $\text{M}+\text{Na}$ ) $^+$  calculated for  $\text{C}_{21}\text{H}_{23}\text{O}_5\text{PNa}$ : 409.1181, found: 409.1178. Enantiomeric excess: 90%, determined by HPLC (Daicel Chirapak OD-H, hexane / isopropanol = 90/10, flow rate 1.0 mL/min,  $T = 30$  °C, 220 nm):  $t_R = 13.0$  min (minor),  $t_R = 16.1$  min (major).

**Diethyl((3*R*,4*S*)-2-oxo-3-phenyl-4-(*p*-tolyl)-3,4-dihydro-2*H*-pyran-6-yl)phosphonate (3b)**

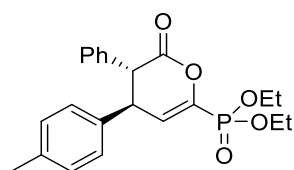

The reaction was directly purified by flash column chromatography (PE:EA= 2:1) on silica gel to give **3b** (yield: 80%, 32 mg, d.r. >20:1, 90% ee) as yellow oil.  $^1\text{H}$  NMR (400 MHz,  $\text{CDCl}_3$ )  $\delta$  7.32 – 7.24 (m, 3H), 7.13 (m, 2H), 7.06 (d,  $J = 7.8$  Hz, 2H), 6.92 (d,  $J = 8.0$  Hz, 2H), 6.50 (dd,  $J = 10.1, 4.0$  Hz, 1H), 4.30 – 4.06 (m, 4H), 4.05 – 3.99 (m, 1H), 3.94 (d,  $J = 8.2$  Hz, 1H), 2.29 (s, 3H), 1.41 (t,  $J = 7.1$  Hz, 3H), 1.33 (t,  $J = 7.1$  Hz, 3H).  $^{13}\text{C}$  NMR (101 MHz,  $\text{CDCl}_3$ )  $\delta$  167.32 (d,  $J = 8.7$  Hz), 145.10, 142.78, 137.57, 129.71, 129.38, 128.78, 128.60, 128.23, 127.94, 127.27, 122.65 (d,  $J = 19.4$  Hz), 63.53 (dd,  $J = 11.4, 5.9$  Hz), 52.65, 45.06 (d,  $J = 12.6$  Hz), 41.01, 21.07, 16.34 (dd,  $J = 9.8, 6.3$  Hz).  $^{31}\text{P}$  NMR (162 MHz,  $\text{CDCl}_3$ )  $\delta$  4.42. HRMS (ESI)  $m/z$  ( $\text{M}+\text{Na}$ ) $^+$  calculated for  $\text{C}_{22}\text{H}_{25}\text{O}_5\text{PNa}$ : 423.1332, found: 423.1339. Enantiomeric excess: 90%, determined by HPLC (Daicel Chirapak OD-H, hexane / isopropanol = 90/10, flow rate 1.0 mL/min,  $T = 30$  °C, 220 nm):  $t_R = 11.8$  min (minor),  $t_R = 13.5$  min (major)

**Diethyl ((3*R*,4*S*)-4-(4-methoxyphenyl)-2-oxo-3-phenyl-3,4-dihydro-2*H*-pyran-6-yl)phosphonate (3c)**

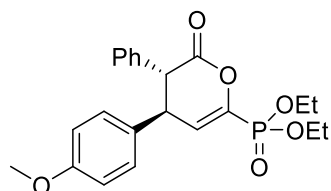

The reaction was directly purified by flash column chromatography (PE:EA= 2:1) on silica gel to give **3c** (yield: 70%, 29.2 mg, d.r. >20:1, 88% ee) as yellow oil.  $^1\text{H}$  NMR (400 MHz,  $\text{CDCl}_3$ )  $\delta$  7.37 – 7.22 (m, 3H), 7.12 (m, 2H), 6.95 (d,  $J = 8.7$  Hz, 2H), 6.78 (d,  $J = 8.7$  Hz, 2H), 6.50 (dd,  $J = 10.1, 3.9$  Hz, 1H), 4.33 – 4.07 (m, 4H), 4.01 (ddd,  $J = 8.4, 4.0, 2.7$  Hz, 1H), 3.92 (d,  $J = 8.3$  Hz, 1H), 3.76 (s, 3H), 1.42 (t,  $J = 7.1$  Hz, 3H), 1.34 (t,  $J = 7.1$  Hz, 3H).  $^{13}\text{C}$  NMR (101 MHz,  $\text{CDCl}_3$ )  $\delta$  167.34 (d,  $J = 8.5$  Hz), 159.04, 145.13, 142.82, 135.49, 130.86, 129.75, 129.68, 128.78, 128.50, 128.25, 128.00, 127.93, 122.82, 122.63, 114.35, 114.00, 63.48 (dd,  $J = 11.7, 5.8$  Hz), 55.27, 52.88, 44.71 (d,  $J = 12.6$  Hz), 16.35 (dd,  $J = 10.4, 6.3$  Hz).  $^{31}\text{P}$  NMR (162 MHz,  $\text{CDCl}_3$ )  $\delta$  4.41. HRMS (ESI)  $m/z$  ( $\text{M}+\text{H}$ ) $^+$  calculated for  $\text{C}_{22}\text{H}_{26}\text{O}_6\text{P}$ : 417.1462, found: 417.1471. Enantiomeric excess: 88%, determined by HPLC (Daicel Chirapak OD-H, hexane / isopropanol = 90/10, flow rate 1.0 mL/min,  $T = 30$  °C, 220 nm):  $t_R = 10.8$  min (minor),  $t_R = 11.7$  min (major).

**Diethyl ((3*R*,4*S*)-4-(4-fluorophenyl)-2-oxo-3-phenyl-3,4-dihydro-2*H*-pyran-6-yl)phosphonate (3d)**

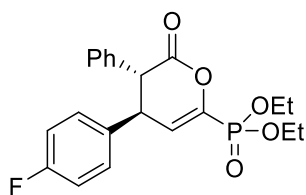

The reaction was directly purified by flash column chromatography (PE:EA= 2:1) on silica gel to give **3d** (yield: 78%, 31.5 mg, d.r. >20:1, 94% ee) as yellow oil. **<sup>1</sup>H NMR** (400 MHz, CDCl<sub>3</sub>) δ 7.30 – 7.27 (m, 3H), 7.09 (dd, *J* = 7.5, 2.1 Hz, 2H), 7.03 – 6.88 (m, 4H), 6.48 (dd, *J* = 10.1, 3.7 Hz, 1H), 4.32 – 4.10 (m, 4H), 4.05 (dt, *J* = 9.0, 3.3 Hz, 1H), 3.88 (d, *J* = 9.0 Hz, 1H), 1.42 (t, *J* = 7.1 Hz, 3H), 1.36 (t, *J* = 7.1 Hz, 3H). **<sup>13</sup>C NMR** (101 MHz, CDCl<sub>3</sub>) δ 167.01 (d, *J* = 8.7 Hz), 163.36, 160.91, 145.69, 143.38, 135.10, 134.72, 134.69, 129.13, 129.05, 128.83, 128.53, 128.30, 128.05, 122.16, 121.97, 116.05, 115.84, 63.52 (dd, *J* = 12.2, 6.0 Hz), 52.83, 44.82 (d, *J* = 12.6 Hz), 16.36 (dd, *J* = 10.3, 6.2 Hz). **<sup>31</sup>P NMR** (202 MHz, CDCl<sub>3</sub>) δ 4.11. **<sup>19</sup>F NMR** (376 MHz, CDCl<sub>3</sub>) δ -114.05. **HRMS** (ESI) *m/z* (M+H)<sup>+</sup> calculated for C<sub>21</sub>H<sub>23</sub>FO<sub>5</sub>P: 405.1267, found: 405.1276. Enantiomeric excess: 94%, determined by HPLC (Daicel Chirapak AD-H, hexane / isopropanol = 90/10, flow rate 1.0 mL/min, T = 30 °C, 228 nm): t<sub>R</sub> = 21.7 min (major), t<sub>R</sub> = 31.8 min (minor).

**Diethyl ((3R,4S)-4-(2-bromophenyl)-2-oxo-3-phenyl-3,4-dihydro-2H-pyran-6-yl)phosphonate (3e)**

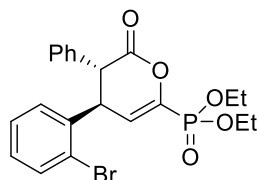

The reaction was directly purified by flash column chromatography (PE:EA= 2:1) on silica gel to give **3e** (yield: 65%, 30.2 mg, d.r. >20:1, 88% ee) as yellow oil. **<sup>1</sup>H NMR** (400 MHz, CDCl<sub>3</sub>) δ 7.60 (dd, *J* = 8.0, 1.4 Hz, 1H), 7.33 (m, 6H), 7.22 – 7.16 (m, 2H), 6.49 – 6.38 (m, 1H), 4.63 (td, *J* = 5.3, 1.2 Hz, 1H), 4.34 – 4.24 (m, 2H), 4.22 – 4.15 (m, 2H), 4.12 – 4.02 (m, 1H), 1.44 (t, *J* = 7.0 Hz, 3H), 1.34 (t, *J* = 7.1 Hz, 3H). **<sup>13</sup>C NMR** (101 MHz, CDCl<sub>3</sub>) δ 166.76 (d, *J* = 8.1 Hz), 146.40, 144.09, 137.01, 135.05, 133.78, 129.66, 129.37, 129.08, 128.89, 128.62, 128.50, 128.32, 128.19, 127.75, 127.20, 124.16, 120.53, 120.34, 63.56 (dd, *J* = 15.8, 5.8 Hz), 50.71, 44.24 (d, *J* = 12.6 Hz), 16.35 (dd, *J* = 12.6, 6.3 Hz). **<sup>31</sup>P NMR** (162 MHz, CDCl<sub>3</sub>) δ 4.06. **HRMS** (ESI) *m/z* (M+H)<sup>+</sup> calculated for C<sub>21</sub>H<sub>22</sub>BrO<sub>5</sub>P: 465.0461, found: 465.0455. Enantiomeric excess: 88%, determined by HPLC (Daicel Chirapak OD-H, hexane / isopropanol = 90/10, flow rate 1.0 mL/min, T = 30 °C, 220 nm): t<sub>R</sub> = 10.5 min (major), t<sub>R</sub> = 11.5 min (minor).

**Diethyl ((3R,4S)-4-(2-methoxyphenyl)-2-oxo-3-phenyl-3,4-dihydro-2H-pyran-6-yl)phosphonate (3f)**

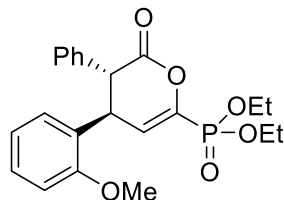

The reaction was directly purified by flash column chromatography (PE:EA= 2:1) on silica gel to give **3f** (yield: 75%, 31.2 mg, d.r. >20:1, 90% ee) as yellow oil. **<sup>1</sup>H NMR** (400 MHz, CDCl<sub>3</sub>) δ 7.36 – 7.27 (m, 6H), 7.04 (dd, *J* = 7.5, 1.7 Hz, 1H), 6.98 – 6.77 (m, 2H), 6.38 (ddd, *J* = 10.1, 5.2, 0.9 Hz, 1H), 4.29 – 4.08 (m, 6H), 3.80 (s, 3H), 1.40 (t, *J* = 7.1 Hz, 3H), 1.34 (t, *J* = 7.1 Hz, 3H). **<sup>13</sup>C NMR** (101 MHz, CDCl<sub>3</sub>) δ 167.25 (d, *J* = 8.2 Hz), 156.84, 144.87, 142.56, 137.09, 129.25, 128.82, 128.41, 127.84, 127.51, 126.91, 120.94, 120.84, 120.65, 110.90, 63.28 (d, *J* = 5.9 Hz), 54.93, 50.36, 41.75 (d, *J* = 12.9 Hz), 16.33

(dd,  $J = 6.3, 4.0$  Hz).  $^{31}\text{P}$  NMR (162 MHz,  $\text{CDCl}_3$ )  $\delta$  4.85. HRMS (ESI)  $m/z$  ( $\text{M}+\text{H}$ ) $^+$  calculated for  $\text{C}_{22}\text{H}_{26}\text{O}_6\text{P}$ : 417.1467, found: 417.1461. Enantiomeric excess: 90%, determined by HPLC (Daicel Chirapak OD-H, hexane / isopropanol = 90/10, flow rate 1.0 mL/min,  $T = 30$  °C, 220 nm):  $t_R = 11.1$  min (minor),  $t_R = 12.0$  min (major).

**diethyl ((3*R*,4*S*)-4-(2,3-dimethoxyphenyl)-2-oxo-3-phenyl-3,4-dihydro-2*H*-pyran-6-yl)phosphonate (3g)**

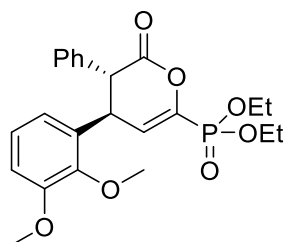

The reaction was directly purified by flash column chromatography (PE:EA= 2:1) on silica gel to give **3g** (yield: 72%, 32.2 mg, d.r. >20:1, 84% ee) as yellow oil.  $^1\text{H}$  NMR (400 MHz  $\text{CDCl}_3$ )  $\delta$  7.34 – 7.19 (m, 5H), 6.97 (t,  $J = 8.0$  Hz, 1H), 6.84 (dd,  $J = 8.3, 1.4$  Hz, 1H), 6.66 (dd,  $J = 7.8, 1.5$  Hz, 1H), 6.37 (dd,  $J = 10.1, 4.7$  Hz, 1H), 4.35 (ddd,  $J = 6.4, 4.7, 2.0$  Hz, 1H), 4.30 – 4.06 (m, 5H), 3.84 (s, 3H), 3.77 (s, 3H), 1.41 (t,  $J = 7.1$  Hz, 3H), 1.35 (t,  $J = 7.1$  Hz, 3H).  $^{13}\text{C}$  NMR (101 MHz,  $\text{CDCl}_3$ )  $\delta$  167.21 (d,  $J = 8.5$  Hz), 152.79, 146.72, 136.63, 132.29, 130.99, 130.50, 128.94, 128.86, 128.82, 128.61, 128.40, 127.86, 127.80, 126.88, 124.15, 121.87, 121.68, 119.89, 112.36, 63.37 (dd,  $J = 9.6, 5.9$  Hz), 60.60, 55.79, 51.00, 16.35 (t,  $J = 6.3$  Hz).  $^{31}\text{P}$  NMR (162 MHz,  $\text{CDCl}_3$ )  $\delta$  4.61. HRMS (ESI)  $m/z$  ( $\text{M}+\text{H}$ ) $^+$  calculated for  $\text{C}_{23}\text{H}_{28}\text{O}_7\text{P}$ : 447.1573, found: 447.1566. Enantiomeric excess: 84%, determined by HPLC (Daicel Chirapak OD-H, hexane / isopropanol = 90/10, flow rate 1.0 mL/min,  $T = 30$  °C, 220 nm):  $t_R = 14.5$  min (minor),  $t_R = 23.3$  min (major).

**Dimethyl ((3*R*,4*S*)-2-oxo-3,4-diphenyl-3,4-dihydro-2*H*-pyran-6-yl)phosphonate (3h)**

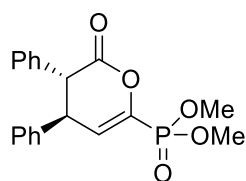

The reaction was directly purified by flash column chromatography (PE:EA= 1:1) on silica gel to give **3h** (yield: 80%, 28.6 mg, d.r. >20:1, 95% ee) as yellow oil.  $^1\text{H}$  NMR (400 MHz,  $\text{CDCl}_3$ )  $\delta$  7.28 (m, 4H), 7.26 – 7.18 (m, 2H), 7.12 (m, 2H), 7.04 (m, 2H), 6.53 (dd,  $J = 10.2, 3.9$  Hz, 1H), 4.07 (ddd,  $J = 8.6, 3.9, 2.8$  Hz, 1H), 3.97 (d,  $J = 8.5$  Hz, 1H), 3.90 (d,  $J = 11.2$  Hz, 3H), 3.81 (d,  $J = 11.2$  Hz, 3H).  $^{13}\text{C}$  NMR (101 MHz,  $\text{CDCl}_3$ )  $\delta$  166.96 (d,  $J = 8.6$  Hz), 144.45, 142.13, 138.78, 135.33, 130.07, 130.06, 129.06, 128.81, 128.70, 128.54, 128.21, 127.41, 123.08 (d,  $J = 19.4$  Hz), 53.70 (dd,  $J = 7.5, 5.8$  Hz), 45.62 (d,  $J = 12.7$  Hz).  $^{31}\text{P}$  NMR (202 MHz,  $\text{CDCl}_3$ )  $\delta$  7.11. HRMS (ESI)  $m/z$  ( $\text{M}+\text{H}$ ) $^+$  calculated for  $\text{C}_{19}\text{H}_{20}\text{O}_5\text{P}$ : 359.1048, found: 359.1054. Enantiomeric excess: 95%, determined by HPLC (Daicel Chirapak AD-H, hexane / isopropanol = 90/10, flow rate 1.0 mL/min,  $T = 30$  °C, 220 nm):  $t_R = 28.4$  min (major),  $t_R =$

31.7 min (minor). (Daicel Chirapak ID, hexane / isopropanol = 90/10, flow rate 1.0 mL/min, T = 30 °C, 220 nm): tR = 22.7 min (minor), tR = 24.4 min (major).

**Diethyl ((3R,4S)-3-(4-chlorophenyl)-2-oxo-4-(p-tolyl)-3,4-dihydro-2H-pyran-6-yl)phosphonate (3i)**

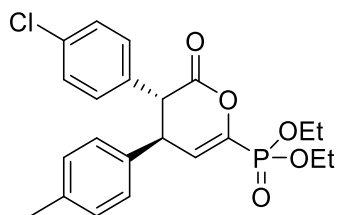

The reaction was directly purified by flash column chromatography (PE:EA= 2:1) on silica gel to give **3i** (yield: 65%, 28.3 mg, d.r. >20:1, 87% ee) as yellow oil. **<sup>1</sup>H NMR** (400 MHz, CDCl<sub>3</sub>) δ 7.25 (d, *J* = 8.4 Hz, 2H), 7.09 – 6.98 (m, 4H), 6.88 (d, *J* = 8.0 Hz, 2H), 6.46 (dd, *J* = 10.1, 3.3 Hz, 1H), 4.31 – 4.08 (m, 4H), 3.97 (dt, *J* = 9.8, 3.3 Hz, 1H), 3.87 (d, *J* = 9.8 Hz, 1H), 2.29 (s, 3H), 1.42 (t, *J* = 7.1 Hz, 3H), 1.37 (t, *J* = 7.1 Hz, 3H). **<sup>13</sup>C NMR** (126 MHz, CDCl<sub>3</sub>) δ 167.08 (d, *J* = 8.8 Hz), 145.09, 143.24, 137.70, 135.53, 133.90, 133.83, 129.86, 129.74, 128.91, 127.31, 122.73 (d, *J* = 19.3 Hz), 63.52 (dd, *J* = 11.4, 5.8 Hz), 52.19, 45.12 (d, *J* = 12.5 Hz), 16.38 (dd, *J* = 9.4, 6.2 Hz). **<sup>31</sup>P NMR** (202 MHz, CDCl<sub>3</sub>) δ 4.20. **HRMS** (ESI) *m/z* (M+H)<sup>+</sup> calculated for C<sub>22</sub>H<sub>25</sub>ClO<sub>5</sub>P: 435.1128, found: 435.1122. Enantiomeric excess: 87%, determined by HPLC (Daicel Chirapak OD-H, hexane / isopropanol = 90/10, flow rate 1.0 mL/min, T = 30 °C, 220 nm): tR = 14 min (minor), tR = 16.1 min (major).

**Diethyl ((3R,4S)-3-(4-fluorophenyl)-2-oxo-4-(p-tolyl)-3,4-dihydro-2H-pyran-6-yl)phosphonate (3j)**

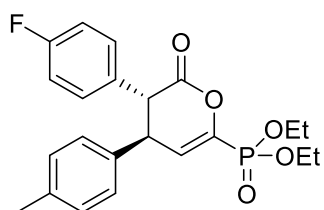

The reaction was directly purified by flash column chromatography (PE:EA= 2:1) on silica gel to give **3j** (yield: 55%, 23 mg, d.r. >20:1, 92% ee) as yellow oil. **<sup>1</sup>H NMR** (400 MHz, CDCl<sub>3</sub>) δ 7.05 – 7.01 (m, 4H), 6.95 (d, *J* = 8.6 Hz, 2H), 6.86 (d, *J* = 8.0 Hz, 2H), 6.45 (dd, *J* = 10.1, 3.4 Hz, 1H), 4.31 – 4.06 (m, 4H), 3.94 (dt, *J* = 9.6, 3.3 Hz, 1H), 3.85 (d, *J* = 9.5 Hz, 1H), 2.27 (s, 3H), 1.39 (t, *J* = 7.1 Hz, 3H), 1.34 (t, *J* = 7.1 Hz, 3H). **<sup>13</sup>C NMR** (126 MHz, CDCl<sub>3</sub>) δ 167.27 (d, *J* = 8.8 Hz), 163.18, 161.22, 145.08, 143.24, 137.64, 135.67, 131.21, 131.18, 130.16, 130.10, 129.70, 129.49, 129.47, 128.43, 127.90, 127.31, 126.64, 122.73 (d, *J* = 19.2 Hz), 115.70 (d, *J* = 21.6 Hz), 63.50 (dd, *J* = 12.0, 5.9 Hz), 52.06, 45.26 (d, *J* = 12.4 Hz), 16.37 (dd, *J* = 9.8, 6.2 Hz). **<sup>31</sup>P NMR** (202 MHz, CDCl<sub>3</sub>) δ 4.24. **<sup>19</sup>F NMR** (471 MHz, CDCl<sub>3</sub>) δ -114.07. **HRMS** (ESI) *m/z* (M+H)<sup>+</sup> calculated for C<sub>22</sub>H<sub>25</sub>FO<sub>5</sub>P: 419.1424, found: 419.1423. Enantiomeric excess: 92%, determined by HPLC (Daicel Chirapak OD-H, hexane / isopropanol = 90/10, flow rate 1.0 mL/min, T = 30 °C, 220 nm): tR = 13.2 min (minor), tR = 14.3 min (major).

**Diethyl ((3R,4S)-3-(4-(tert-butyl)phenyl)-2-oxo-4-(p-tolyl)-3,4-dihydro-2H-pyran-6-yl)phosphonate (3k)**

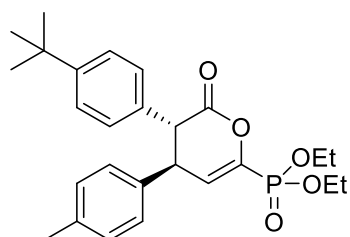

The reaction was directly purified by flash column chromatography (PE:EA= 2:1) on silica gel to give **3k** (yield: 80%, 36.5 mg, d.r. >20:1, 86% ee) as yellow oil.  $^1\text{H NMR}$  (500 MHz,  $\text{CDCl}_3$ )  $\delta$  7.31 (d,  $J$  = 8.3 Hz, 2H), 7.10 (dd,  $J$  = 13.6, 8.1 Hz, 4H), 6.97 (d,  $J$  = 8.1 Hz, 2H), 6.49 (dd,  $J$  = 10.1, 4.7 Hz, 1H), 4.29 – 4.00 (m, 5H), 3.97 (d,  $J$  = 6.2 Hz, 1H), 2.30 (s, 3H), 1.41 (t,  $J$  = 7.1 Hz, 3H), 1.31 (t,  $J$  = 6.9 Hz, 3H), 1.28 (s, 9H).  $^{13}\text{C NMR}$  (126 MHz,  $\text{CDCl}_3$ )  $\delta$  167.28 (d,  $J$  = 8.4 Hz), 150.93, 144.92, 143.08, 137.56, 135.98, 132.51, 129.76, 127.53, 127.16, 125.75, 122.07 (d,  $J$  = 19.3 Hz), 63.39 (dd,  $J$  = 16.6, 5.7 Hz), 52.06, 44.85 (d,  $J$  = 12.5 Hz), 34.51, 31.27, 21.08, 16.33 (dd,  $J$  = 14.1, 6.3 Hz).  $^{31}\text{P NMR}$  (202 MHz,  $\text{CDCl}_3$ )  $\delta$  4.50. **HRMS** (ESI)  $m/z$  ( $\text{M}+\text{H}$ ) $^+$  calculated for  $\text{C}_{26}\text{H}_{34}\text{O}_5\text{P}$ : 457.2144, found: 457.2143. Enantiomeric excess: 86%, determined by HPLC (Daicel Chirapak OD-H, hexane / isopropanol = 90/10, flow rate 1.0 mL/min,  $T$  = 30 °C, 220 nm):  $t_R$  = 7.6 min (minor),  $t_R$  = 9.6 min (major).

**Diethyl ((3R,4S)-3-(3-methoxyphenyl)-2-oxo-4-(p-tolyl)-3,4-dihydro-2H-pyran-6-yl)phosphonate (3l)**

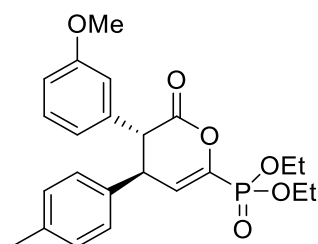

The reaction was directly purified by flash column chromatography (PE:EA= 2:1) on silica gel to give **3l** (yield: 58%, 27.9 mg, d.r. >20:1, 88% ee) as yellow oil.  $^1\text{H NMR}$  (400 MHz,  $\text{CDCl}_3$ )  $\delta$  7.21 (t,  $J$  = 8.0 Hz, 1H), 7.07 (d,  $J$  = 8.0 Hz, 2H), 6.95 (d,  $J$  = 8.1 Hz, 2H), 6.80 (dd,  $J$  = 8.2, 2.5 Hz, 1H), 6.74 (dd,  $J$  = 7.7, 1.7 Hz, 1H), 6.68 (t,  $J$  = 2.2 Hz, 1H), 6.48 (dd,  $J$  = 10.1, 4.1 Hz, 1H), 4.32 – 4.06 (m, 4H), 4.02 (ddd,  $J$  = 6.8, 4.2, 2.4 Hz, 1H), 3.92 (d,  $J$  = 7.8 Hz, 1H), 3.75 (s, 3H), 2.29 (s, 3H), 1.41 (t,  $J$  = 7.1 Hz, 3H), 1.34 (t,  $J$  = 7.1 Hz, 3H).  $^{13}\text{C NMR}$  (101 MHz,  $\text{CDCl}_3$ )  $\delta$  167.11 (d,  $J$  = 8.6 Hz), 159.77, 145.18, 142.87, 137.59, 137.02, 135.90, 129.76 (d,  $J$  = 4.9 Hz), 127.22, 122.40 (d,  $J$  = 19.3 Hz), 120.40, 114.19, 113.15, 63.46 (dd,  $J$  = 8.8, 5.9 Hz), 55.24, 52.59, 45.03 (d,  $J$  = 12.5 Hz), 29.72, 21.05, 16.34 (dd,  $J$  = 10.0, 6.3 Hz).  $^{31}\text{P NMR}$  (162 MHz,  $\text{CDCl}_3$ )  $\delta$  4.39. **HRMS** (ESI)  $m/z$  ( $\text{M}+\text{H}$ ) $^+$  calculated for  $\text{C}_{23}\text{H}_{28}\text{O}_6\text{P}$ : 431.1624, found: 431.1617. Enantiomeric excess: 88%, determined by HPLC (Daicel Chirapak OD-H, hexane / isopropanol = 90/10, flow rate 1.0 mL/min,  $T$  = 30 °C, 220 nm):  $t_R$  = 14.3 min (minor),  $t_R$  = 16.8 min (major).

**Diethyl ((3R,4S)-3-([1,1'-biphenyl]-4-yl)-2-oxo-4-(p-tolyl)-3,4-dihydro-2H-pyran-6-yl)phosphonate (3m)**

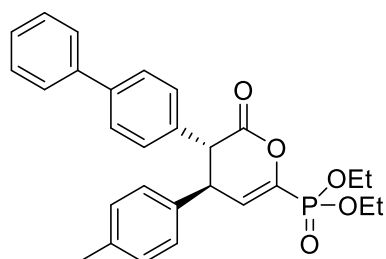



The reaction was directly purified by flash column chromatography (PE:EA= 2:1) on silica gel to give **3m** (yield: 60%, 28.6 mg, d.r. >20:1, 88% ee) as yellow oil). <sup>1</sup>H NMR (400 MHz, CDCl<sub>3</sub>) δ 7.51 – 7.45 (m, 3H), 7.44 – 7.38 (m, 2H), 7.38 – 7.32 (m, 2H), 7.29 (d, *J* = 2.0 Hz, 1H), 7.14 (dt, *J* = 7.7, 1.5 Hz, 1H), 7.08 (d, *J* = 7.8 Hz, 2H), 6.96 (d, *J* = 8.0 Hz, 2H), 6.52 (dd, *J* = 10.1, 3.9 Hz, 1H), 4.31 – 4.08 (m, 4H), 4.09 – 4.04 (m, 1H), 4.01 (d, *J* = 8.0 Hz, 1H), 2.30 (s, 3H), 1.41 (t, *J* = 7.1 Hz, 3H), 1.29 (t, *J* = 7.1 Hz, 3H). <sup>13</sup>C NMR (126 MHz, CDCl<sub>3</sub>) δ 167.32 (d, *J* = 8.5 Hz), 145.03, 143.18, 140.78, 140.33, 137.60, 135.85, 134.49, 130.14, 129.75, 128.82, 128.66, 128.38, 128.01, 127.45, 127.30, 127.04, 125.99, 123.12, 122.61, 122.46, 122.03, 63.48 (dd, *J* = 12.9, 5.9 Hz), 52.36, 45.05 (d, *J* = 12.5 Hz), 16.38 (dd, *J* = 10.8, 6.2 Hz). <sup>31</sup>P NMR (202 MHz, CDCl<sub>3</sub>) δ 4.40. HRMS (ESI) *m/z* (M+H)<sup>+</sup> calculated for C<sub>28</sub>H<sub>30</sub>O<sub>5</sub>P: 477.1831, found: 477.1827. Enantiomeric excess: 88%, determined by HPLC (Daicel Chirapak OD-H, hexane / isopropanol = 90/10, flow rate 1.0 mL/min, T = 30 °C, 220 nm): t<sub>R</sub> = 15.0 min (minor), t<sub>R</sub> = 23.7 min (major).

**Diethyl((3*R*,4*S*)-3-(naphthalen-1-yl)-2-oxo-4-(*p*-tolyl)-3,4-dihydro-2*H*-pyran-6yl)phosphonate (3n)**

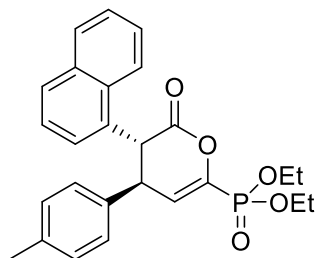

The reaction was directly purified by flash column chromatography (PE:EA= 2:1) on silica gel to give **3n** (yield: 85%, 38.3 mg, d.r. >20:1, 94% ee) as yellow oil). <sup>1</sup>H NMR (500 MHz, CDCl<sub>3</sub>) δ 7.80 (dd, *J* = 8.8, 3.6 Hz, 2H), 7.75 – 7.69 (m, 1H), 7.54-7.45 (m, 4H), 7.31 (dd, *J* = 8.6, 2.0 Hz, 1H), 7.04 (d, *J* = 7.9 Hz, 2H), 6.96 (d, *J* = 8.2 Hz, 1H), 6.52 (dd, *J* = 10.1, 3.9 Hz, 1H), 4.27 (ddq, *J* = 8.2, 7.0, 3.3 Hz, 2H), 4.21 – 4.13 (m, 2H), 4.15 – 4.08 (m, 2H), 2.27 (s, 3H), 1.42 (t, *J* = 7.1 Hz, 3H), 1.30 (t, *J* = 7.1 Hz, 3H). <sup>13</sup>C NMR (126 MHz, CDCl<sub>3</sub>) δ 167.32 (d, *J* = 8.5 Hz), 144.98, 143.13, 137.59, 135.83, 133.17, 132.78 (d, *J* = 10.5 Hz), 129.76, 128.72, 127.84, 127.66, 127.48, 127.26, 126.37 (d, *J* = 7.7 Hz), 125.66, 122.58 (d, *J* = 19.3 Hz), 63.48 (dd, *J* = 17.0, 5.9 Hz), 52.77, 44.91 (d, *J* = 12.5 Hz), 21.05, 16.36 (dd, *J* = 15.6, 6.2 Hz). <sup>31</sup>P NMR (202 MHz, CDCl<sub>3</sub>) δ 4.44. HRMS (ESI) *m/z* (M+H)<sup>+</sup> calculated for C<sub>26</sub>H<sub>28</sub>O<sub>5</sub>P: 451.1674, found: 451.1676. Enantiomeric excess: 94%, determined by HPLC (Daicel Chirapak AD-H, hexane/ isopropanol = 90/10, flow rate 1.0 mL/min, T = 30 °C, 254 nm): t<sub>R</sub> = 31.1 min (minor), t<sub>R</sub> = 33.9 min (major).

**10. Characterization of products 4a-4h**

**Dimethyl (2*R*,3*R*)-2,3-diphenylpentanedioate (4a)**

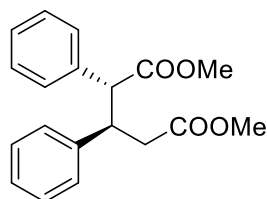

The reaction was directly purified by flash column chromatography (PE:EA= 10:1) on silica gel to give product **4a** (yield: 70%, 21.8 mg, d.r. >20:1, 92% ee) as white solid). <sup>1</sup>H NMR (500 MHz, CDCl<sub>3</sub>) δ 7.15 – 7.08 (m, 7H), 7.08 – 7.03 (m, 1H), 7.02 – 6.97 (m, 2H), 3.90 – 3.80 (m, 2H), 3.69 (s, 3H), 3.51 (s, 3H),

2.88 – 2.72 (m, 2H).  $^{13}\text{C}$  NMR (126 MHz,  $\text{CDCl}_3$ )  $\delta$  173.38, 171.90, 140.18, 136.59, 128.60, 128.25, 128.12, 127.26, 126.70, 57.18, 52.18, 51.57, 45.49, 39.22, 29.72. **HRMS** (ESI)  $m/z$  ( $\text{M}+\text{Na}$ ) $^+$  calculated for  $\text{C}_{19}\text{H}_{20}\text{O}_4\text{Na}$ : 335.1259, found: 335.1269; Enantiomeric excess: 92%, determined by HPLC (Daicel Chirapak OD-H, hexane/ isopropanol = 90/10, flow rate 1.0 mL/min,  $T = 30\text{ }^\circ\text{C}$ , 254 nm):  $t_R = 8.6$  min (minor),  $t_R = 9.9$  min (major).

**Dimethyl (2*R*,3*R*)-3-(2-chlorophenyl)-2-phenylpentanedioate (4b)**

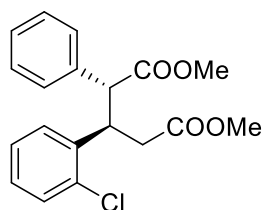

The reaction was directly purified by flash column chromatography (PE:EA= 10:1) on silica gel to give product **4b** (yield: 75%, 26 mg, d.r. >20:1, 76% ee) as colorless oil.  $^1\text{H}$  NMR (400 MHz,  $\text{CDCl}_3$ )  $\delta$  7.26 – 7.22 (m, 2H), 7.20 – 7.05 (m, 6H), 7.04 – 6.98 (m, 1H), 4.42 (s, 1H), 4.12 (d,  $J = 10.3$  Hz, 1H), 3.67 (s, 3H), 3.52 (s, 3H), 3.05 – 2.91 (m, 1H), 2.83 (dd,  $J = 15.6, 4.4$  Hz, 1H).  $^{13}\text{C}$  NMR (101 MHz,  $\text{CDCl}_3$ )  $\delta$  173.06, 171.81, 137.78, 136.28, 134.25, 129.81, 128.90, 128.39, 128.32, 128.07, 127.94, 127.45, 126.65, 55.26, 52.18, 51.60, 41.53, 37.48. **HRMS** (ESI)  $m/z$  ( $\text{M}+\text{Na}$ ) $^+$  calculated for  $\text{C}_{19}\text{H}_{19}\text{ClO}_4\text{Na}$ : 369.0870, found: 369.0885; Enantiomeric excess: 76%, determined by HPLC (Daicel Chirapak OD-H, hexane/ isopropanol = 90/10, flow rate 1.0 mL/min,  $T = 30\text{ }^\circ\text{C}$ , 220 nm):  $t_R = 6.6$  min (minor),  $t_R = 8.8$  min (major)

**Dimethyl (2*R*,3*R*)-3-(2-bromophenyl)-2-phenylpentanedioate (4c)**

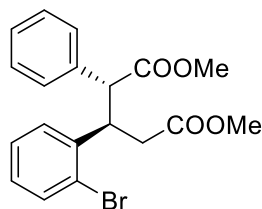

The reaction was directly purified by flash column chromatography (PE:EA= 10:1) on silica gel to give product **4c** (yield: 65%, 25.3 mg, d.r. >20:1, 84% ee) as colorless oil.  $^1\text{H}$  NMR (400 MHz,  $\text{CDCl}_3$ )  $\delta$  7.39 (m, 1H), 7.30 – 7.22 (m, 2H), 7.22 – 7.12 (m, 5H), 6.95 (m, 1H), 4.42 (s, 1H), 4.12 (s, 1H), 3.66 (s, 3H), 3.52 (s, 3H), 2.97 (s, 1H), 2.82 (dd,  $J = 15.5, 4.4$  Hz, 1H).  $^{13}\text{C}$  NMR (101 MHz,  $\text{CDCl}_3$ )  $\delta$  172.95, 171.81, 136.20, 133.17, 128.63, 128.48, 128.35, 128.26, 127.48, 127.32, 55.58, 52.17, 51.62, 43.52, 37.48. **HRMS** (ESI)  $m/z$  ( $\text{M}+\text{Na}$ ) $^+$  calculated for  $\text{C}_{19}\text{H}_{19}\text{BrO}_4\text{Na}$ : 413.0364, found: 413.0357; Enantiomeric excess: 84%, determined by HPLC (Daicel Chirapak OD-H, hexane/ isopropanol = 90/10, flow rate 1.0 mL/min,  $T = 30\text{ }^\circ\text{C}$ , 220 nm):  $t_R = 6.8$  min (minor),  $t_R = 10.3$  min (major).

**Dimethyl (2*R*,3*R*)-3-(4-bromophenyl)-2-phenylpentanedioate (4d)**

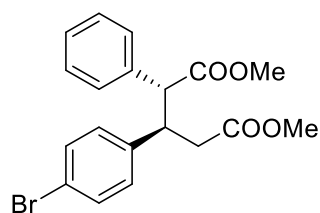

The reaction was directly purified by flash column chromatography (PE:EA= 10:1) on silica gel to give product **4d** (yield: 76%, 29.6 mg, d.r. >20:1, 91% ee) as colorless oil. **<sup>1</sup>H NMR** (400 MHz, CDCl<sub>3</sub>) δ 7.25 – 7.21 (m, 2H), 7.19 – 7.06 (m, 5H), 6.92 – 6.81 (m, 2H), 3.89 – 3.76 (m, 2H), 3.69 (s, 3H), 3.53 (s, 3H), 2.86 – 2.65 (m, 2H). **<sup>13</sup>C NMR** (101 MHz, CDCl<sub>3</sub>) δ 173.13, 171.63, 139.29, 136.21, 131.27, 129.86, 128.51, 128.45, 127.50, 120.59, 56.90, 52.28, 51.68, 44.89, 38.99. **HRMS** (ESI) m/z (M+Na)<sup>+</sup> calculated for C<sub>19</sub>H<sub>19</sub>BrO<sub>4</sub>Na: 413.0364, found: 413.0375 Enantiomeric excess: 91%, determined by HPLC (Daicel Chirapak AD-H, hexane/ isopropanol = 90/10, flow rate 1.0 mL/min, T = 30 °C, 220 nm): tR = 9 min (major), tR = 10.5 min (minor).

**Dimethyl (2R,3R)-2-(4-chlorophenyl)-3-(p-tolyl)pentanedioate (4e)**

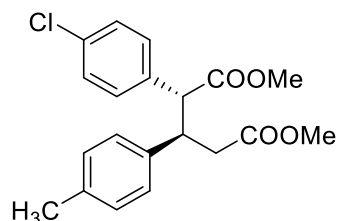

The reaction was directly purified by flash column chromatography (PE:EA= 10:1) on silica gel to give product **4e** (yield: 71%, 25.6 mg, d.r. >20:1, 90% ee) as colorless oil. **<sup>1</sup>H NMR** (500 MHz, CDCl<sub>3</sub>) δ 7.11 (d, *J* = 8.6 Hz, 1H), 7.06 (d, *J* = 8.6 Hz, 1H), 6.92 (d, *J* = 7.9 Hz, 1H), 6.86 (d, *J* = 8.1 Hz, 1H), 3.85 – 3.74 (m, 1H), 3.69 (s, 2H), 3.52 (s, 2H), 2.82 – 2.67 (m, 1H), 2.20 (s, 2H). **<sup>13</sup>C NMR** (126 MHz, CDCl<sub>3</sub>) δ 173.18, 171.84, 136.66, 136.37, 135.20, 133.11, 129.99, 129.02, 128.43, 127.85, 56.47, 52.31, 51.63, 44.94, 39.38, 21.02. **HRMS** (ESI) m/z (M+Na)<sup>+</sup> calculated for C<sub>20</sub>H<sub>21</sub>ClO<sub>4</sub>Na: 383.1026, found: 383.1040: Enantiomeric excess: 90%, determined by HPLC (Daicel Chirapak OD-H, hexane/ isopropanol = 90/10, flow rate 1.0 mL/min, T = 30 °C, 220 nm): tR = 5.4 min (minor), tR = 5.9 min (major)

**Dimethyl (2R,3R)-2-(4-fluorophenyl)-3-(p-tolyl)pentanedioate (4f)**

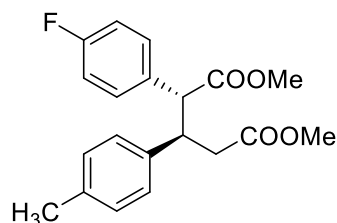

The reaction was directly purified by flash column chromatography (PE:EA= 10:1) on silica gel to give product **4f** (yield: 69%, 23.7 mg, d.r. >20:1, 88% ee) as colorless oil. **<sup>1</sup>H NMR** (400 MHz, CDCl<sub>3</sub>) δ 7.18 – 6.96 (m, 1H), 7.00 – 6.68 (m, 3H), 3.88 – 3.75 (m, 1H), 3.69 (s, 1H), 3.52 (s, 1H), 2.91 – 2.54 (m, 1H), 2.20 (s, 1H). **<sup>13</sup>C NMR** (101 MHz, CDCl<sub>3</sub>) δ 173.39, 171.87, 163.13, 160.69, 136.79, 136.28, 132.47, 132.43, 130.22, 130.14, 128.95, 127.86, 115.23, 115.02, 56.35, 52.23, 51.60, 45.14, 39.32, 21.00. **<sup>19</sup>F NMR** (376 MHz, CDCl<sub>3</sub>) δ -115.20. **HRMS** (ESI) m/z (M+Na)<sup>+</sup> calculated for C<sub>20</sub>H<sub>21</sub>FO<sub>4</sub>Na: 367.1322, found: 367.1334: Enantiomeric excess: 88%, determined by HPLC (Daicel Chirapak OD-H, hexane/ isopropanol = 90/10, flow rate 1.0 mL/min, T = 30 °C, 220 nm): tR = 5.3 min (minor), tR = 5.6 min (major).

**Dimethyl (2R,3R)-2-([1,1'-biphenyl]-4-yl)-3-(p-tolyl)pentanedioate (4g)**

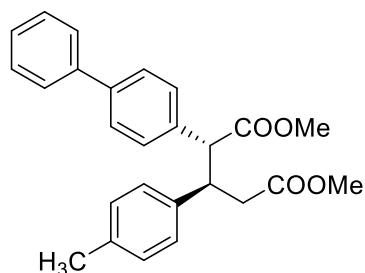

The reaction was directly purified by flash column chromatography (PE:EA= 10:1) on silica gel to give product **4g** (yield: 65%, 23.7 mg, d.r. >20:1, 84% ee) as colorless oil. **<sup>1</sup>H NMR** (400 MHz, CDCl<sub>3</sub>) δ 7.54 – 7.45 (m, 2H), 7.43 – 7.34 (m, 4H), 7.34 – 7.28 (m, 1H), 7.20 (d, *J* = 8.3 Hz, 2H), 6.92 (s, 4H), 3.95 – 3.81 (m, 2H), 3.70 (s, 3H), 3.52 (s, 3H), 2.87 – 2.49 (m, 2H), 2.19 (s, 3H). **<sup>13</sup>C NMR** (101 MHz, CDCl<sub>3</sub>) δ 173.46, 172.01, 140.53, 139.90, 137.02, 136.19, 135.72, 129.96, 129.06, 128.93, 128.80, 128.71, 127.94, 127.48, 127.34, 127.26, 127.07, 126.93, 126.89, 56.81, 52.22, 51.59, 44.97, 39.30, 21.02. **HRMS** (ESI) *m/z* (M+H)<sup>+</sup> calculated for C<sub>26</sub>H<sub>27</sub>O<sub>4</sub>: 403.1909, found: 403.1916; Enantiomeric excess: 84%, determined by HPLC (Daicel Chirapak OD-H, hexane/ isopropanol = 90/10, flow rate 0.3 mL/min, T = 30 °C, 220 nm): tR = 16.3 min (minor), tR = 17.1 min (major).

**Dimethyl (2R,3R)-2-(naphthalen-2-yl)-3-(p-tolyl)pentanedioate (4h)**

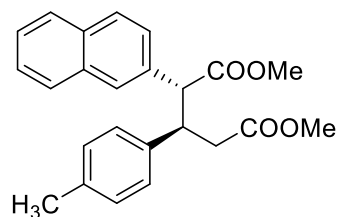

The reaction was directly purified by flash column chromatography (PE:EA= 10:1) on silica gel to give product **4h** (yield: 84%, 31.5 mg, d.r. >20:1, 86% ee) as colorless oil. **<sup>1</sup>H NMR** (400 MHz, CDCl<sub>3</sub>) δ 7.81 – 7.50 (m, 1H), 7.45 – 7.28 (m, 1H), 7.06 – 6.79 (m, 1H), 4.19 – 3.84 (m, 1H), 3.69 (s, 1H), 3.53 (s, 1H), 2.99 – 2.65 (m, 0H), 2.14 (s, 1H). **<sup>13</sup>C NMR** (101 MHz, CDCl<sub>3</sub>) δ 173.47, 172.02, 136.98, 136.16, 134.20, 133.14, 132.53, 128.93, 127.92, 127.89, 127.86, 127.82, 127.52, 126.46, 125.91, 125.80, 57.17, 52.21, 51.59, 44.81, 39.48, 20.96. **HRMS** (ESI) *m/z* (M+H)<sup>+</sup> calculated for C<sub>24</sub>H<sub>25</sub>O<sub>4</sub>: 377.1753, found: 377.1767; Enantiomeric excess: 86%, determined by HPLC (Daicel Chirapak OJ, hexane/ isopropanol = 90/10, flow rate 0.3 mL/min, T = 30 °C, 220 nm): tR = 35.6 min (major), tR = 41.9 min (minor).

# NMR Spectra of Allyl Alcohols

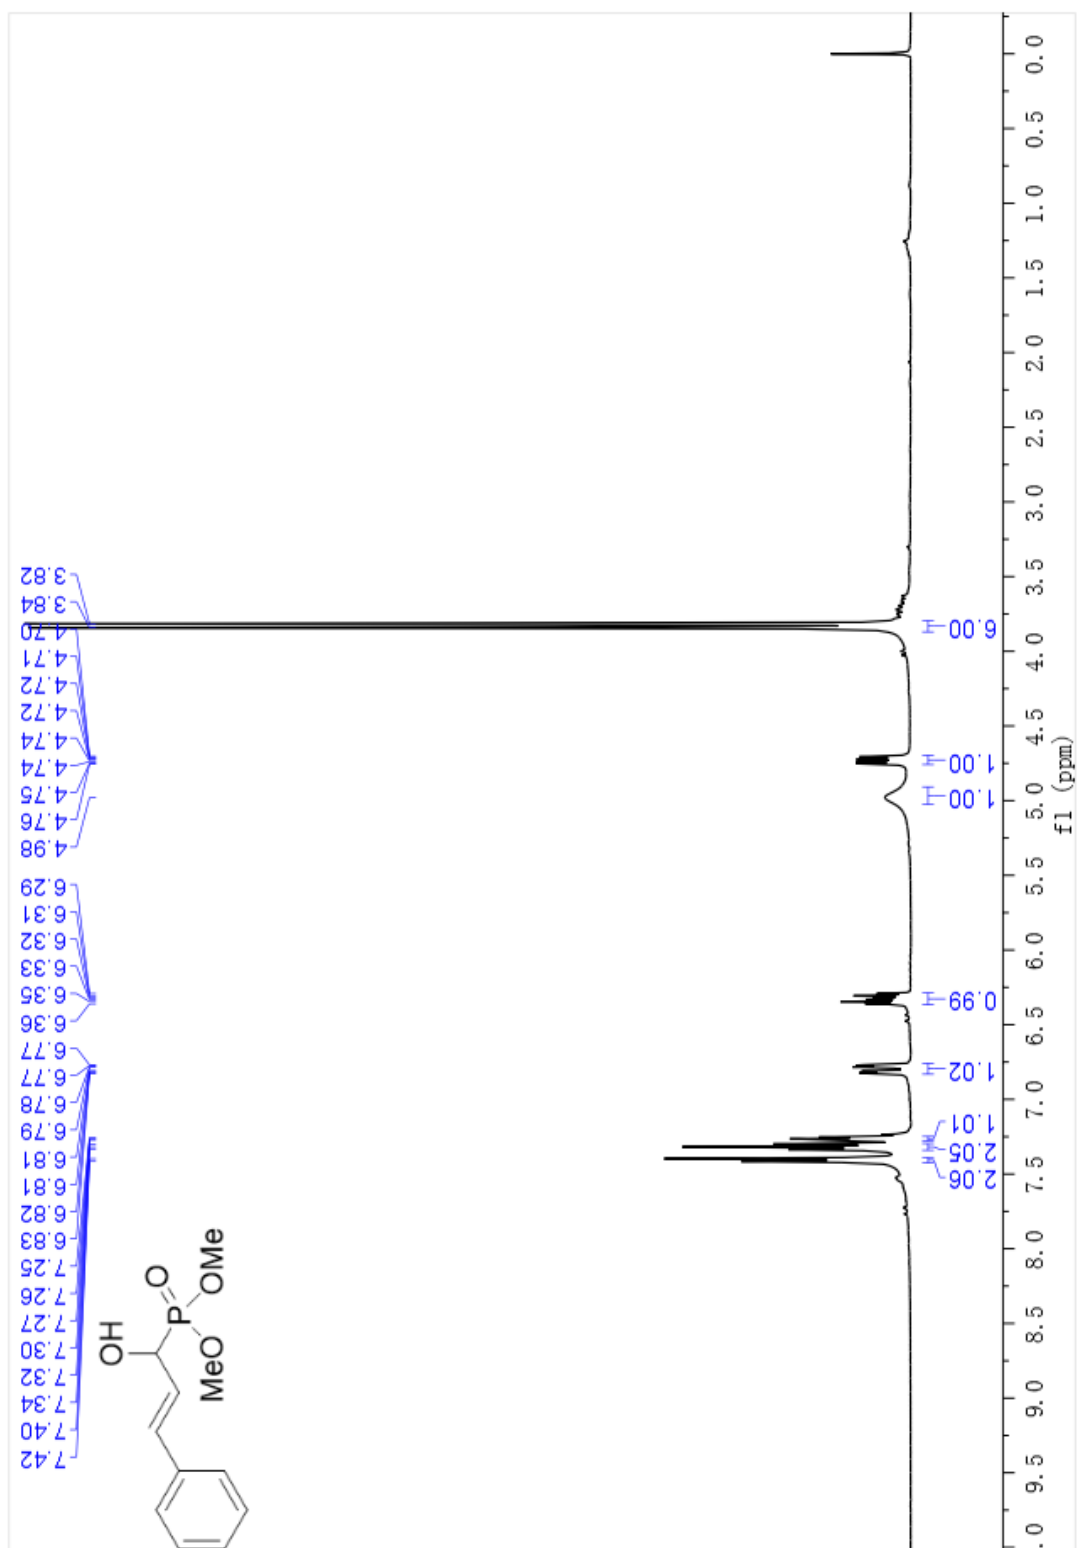

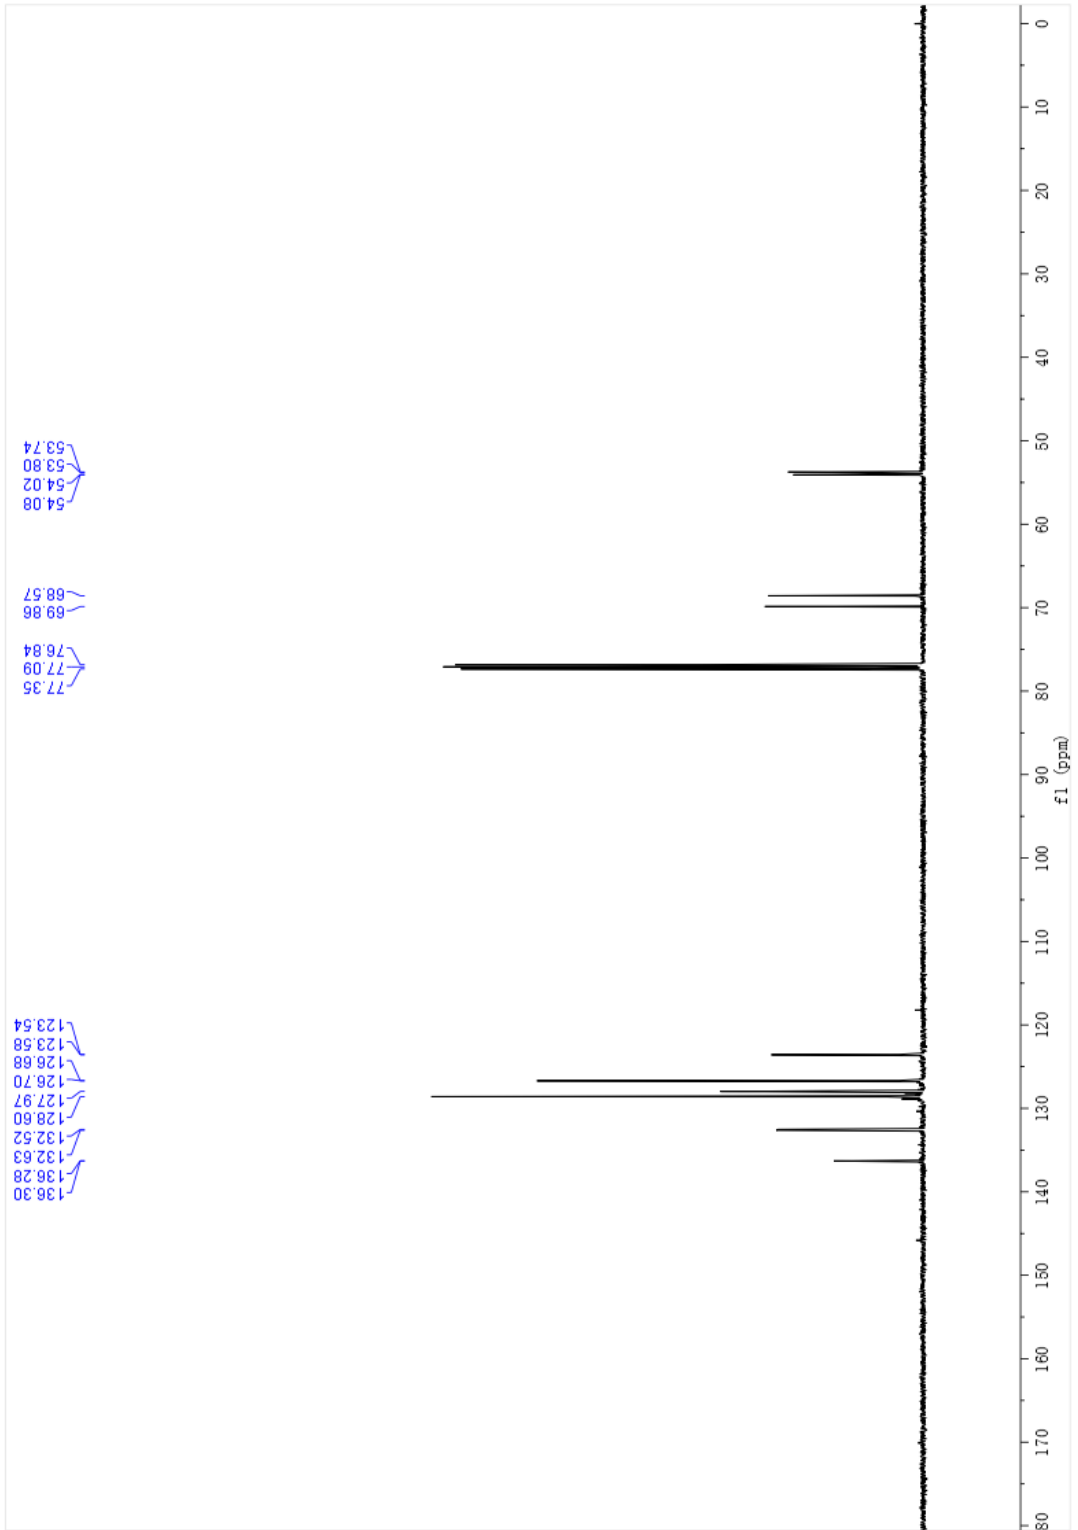

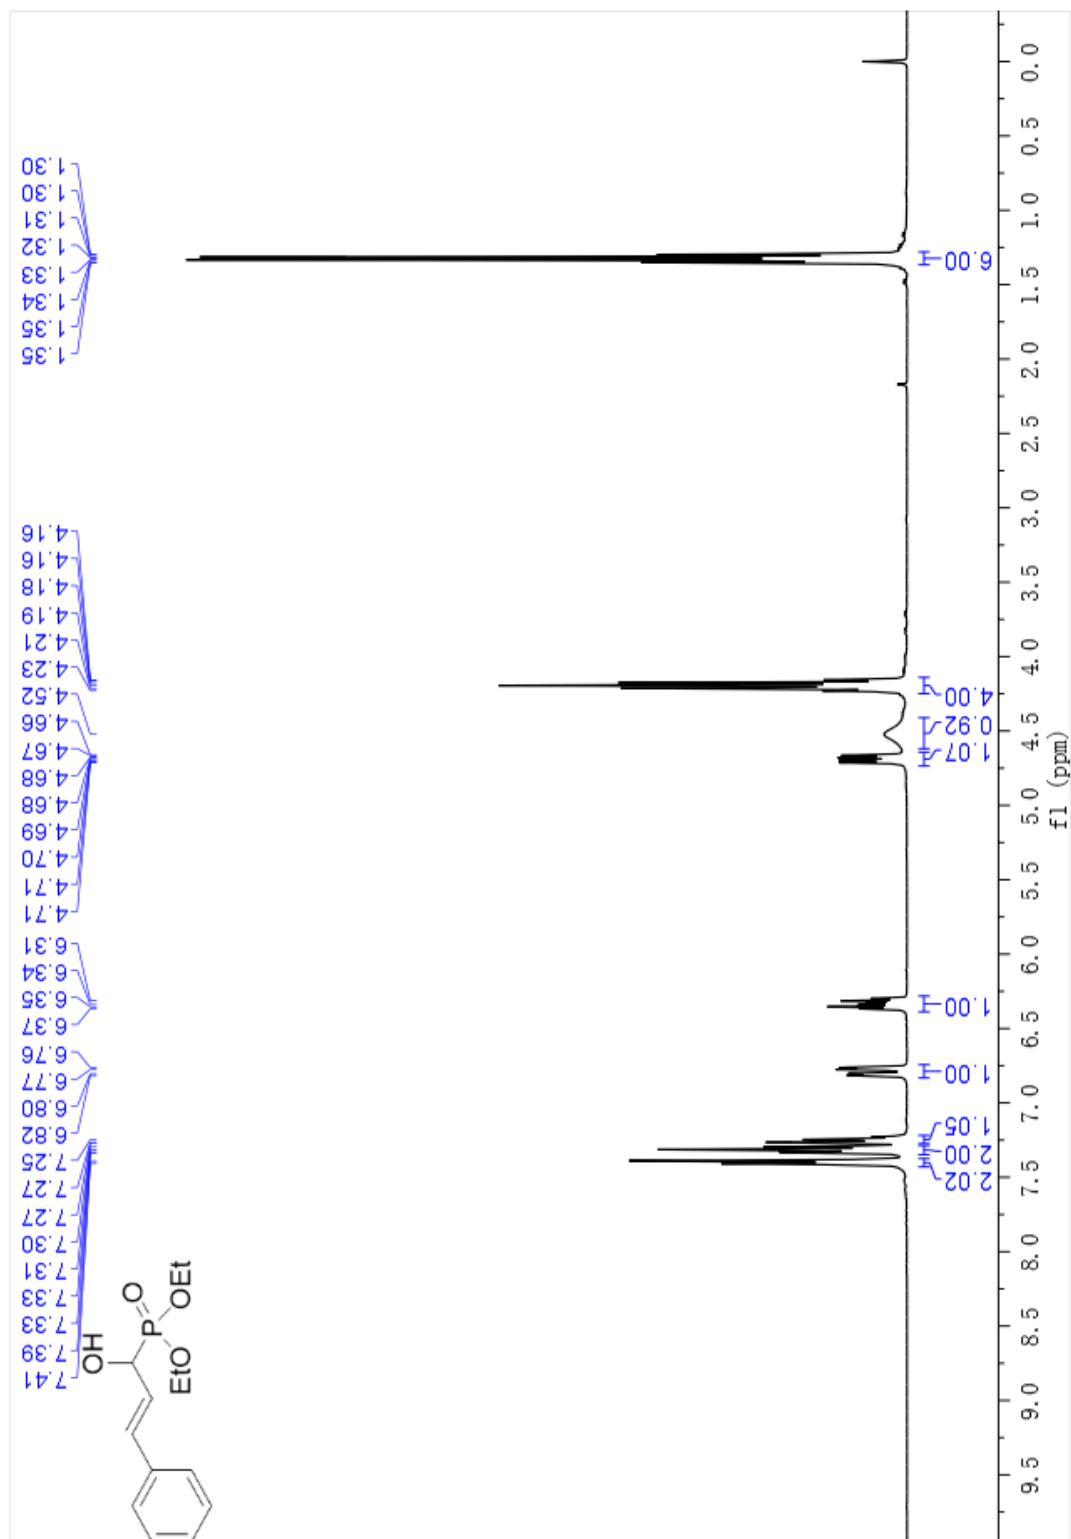

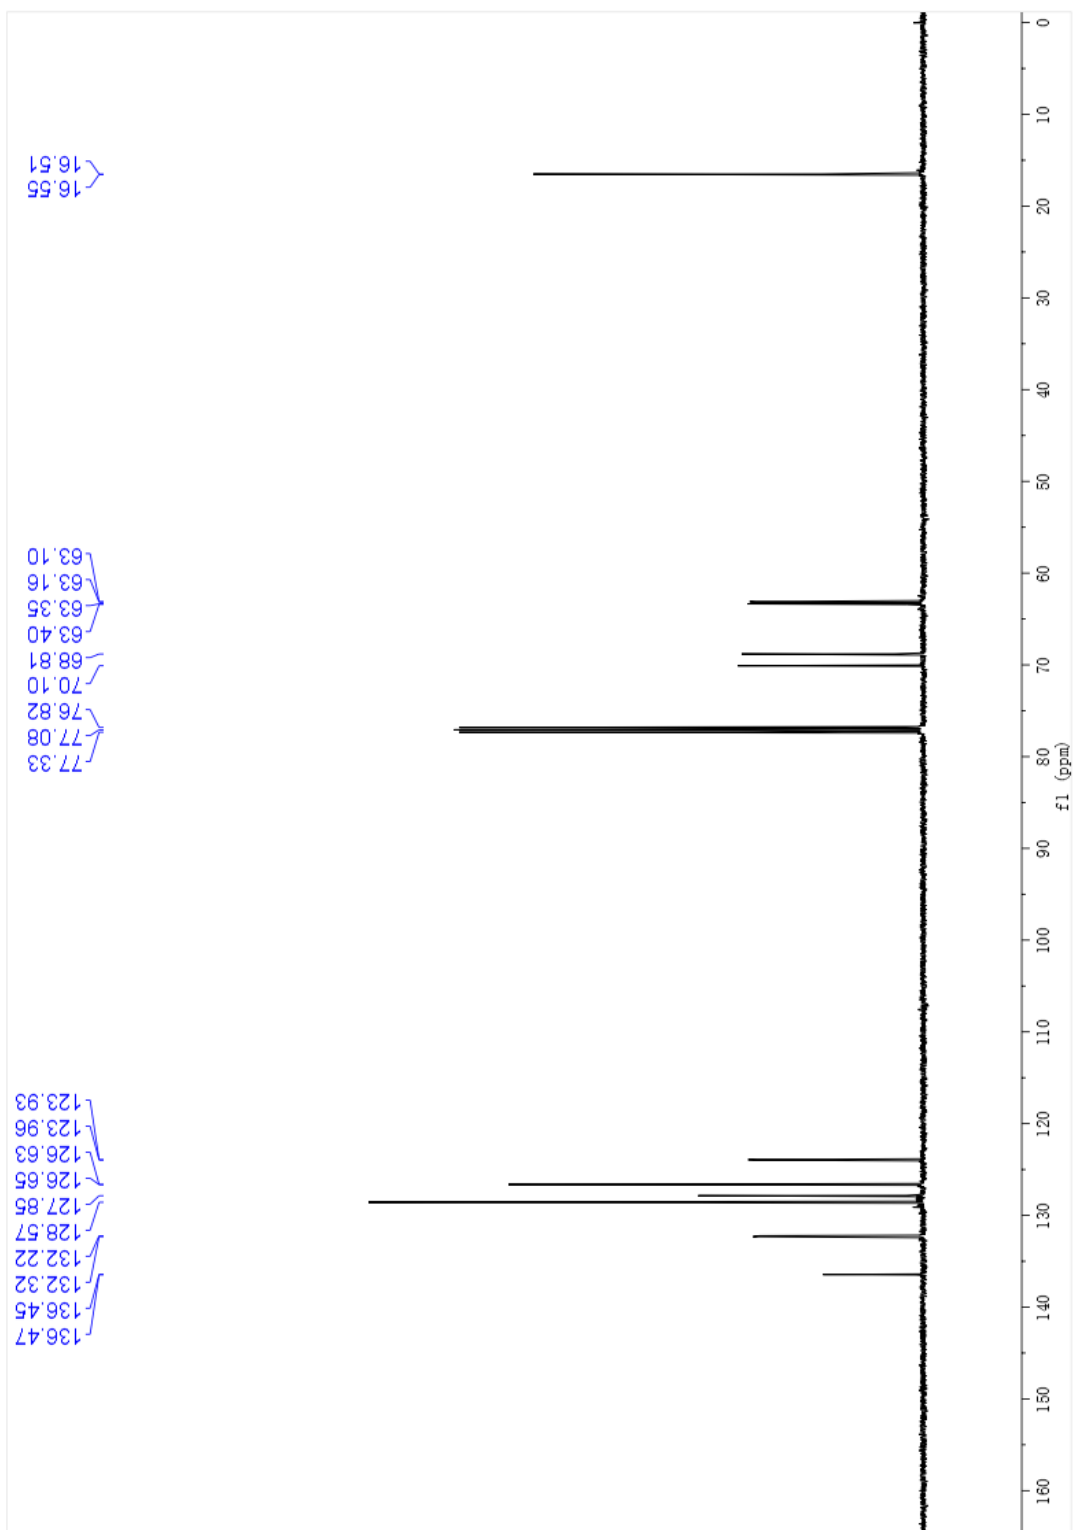



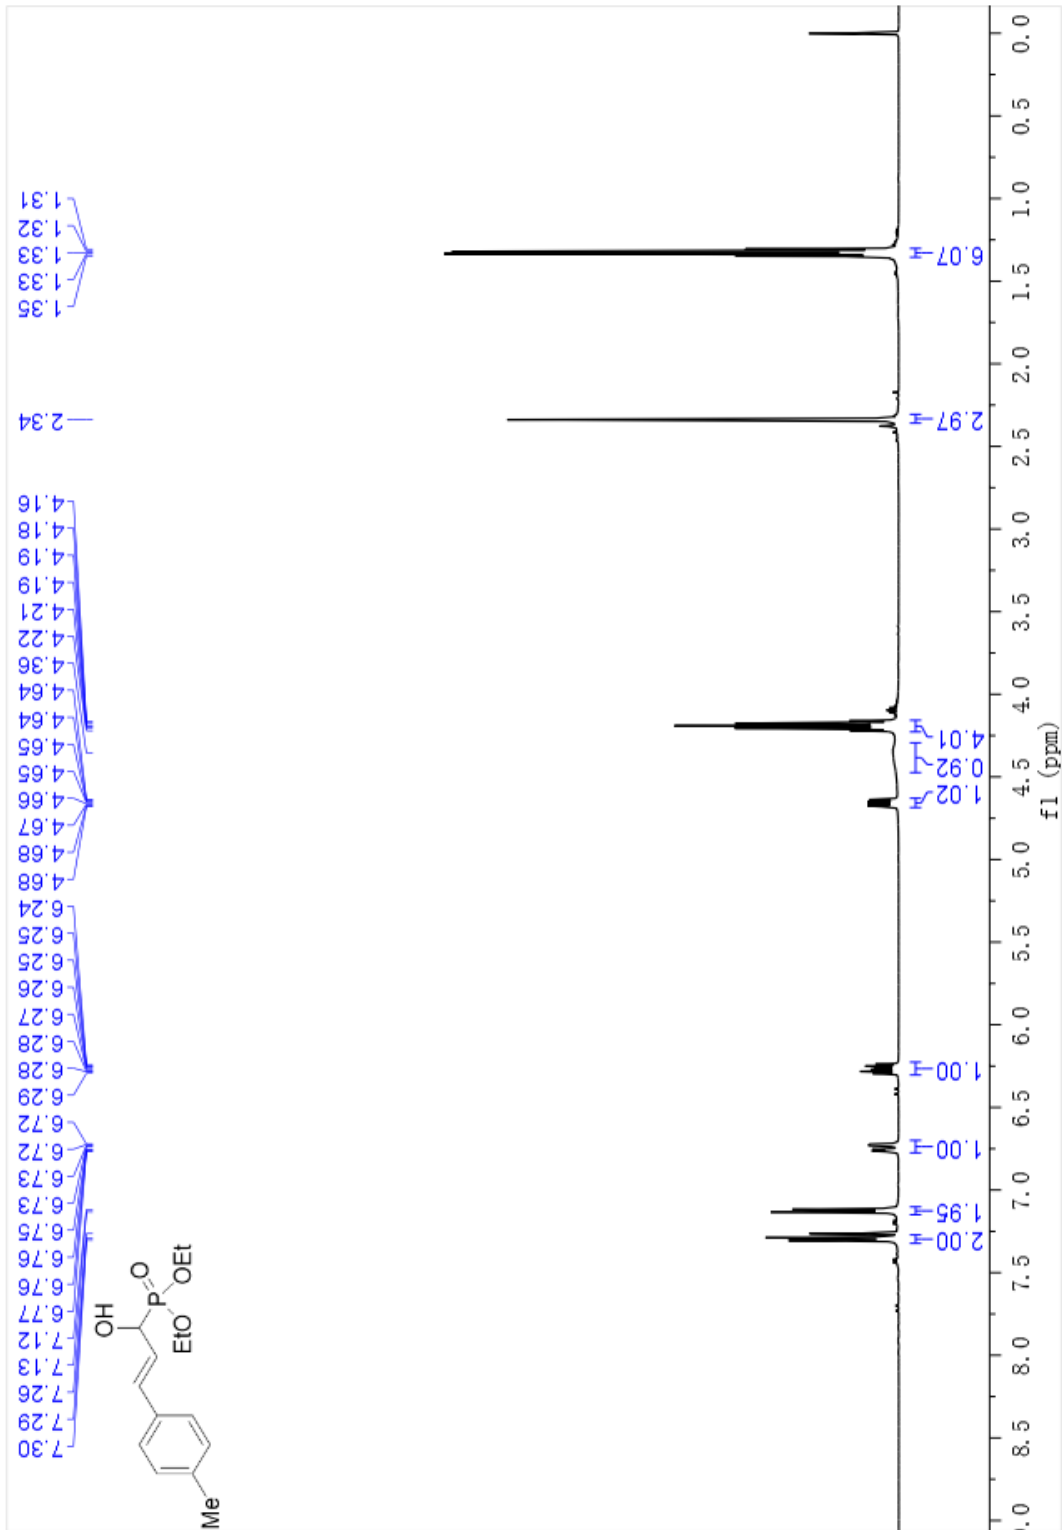

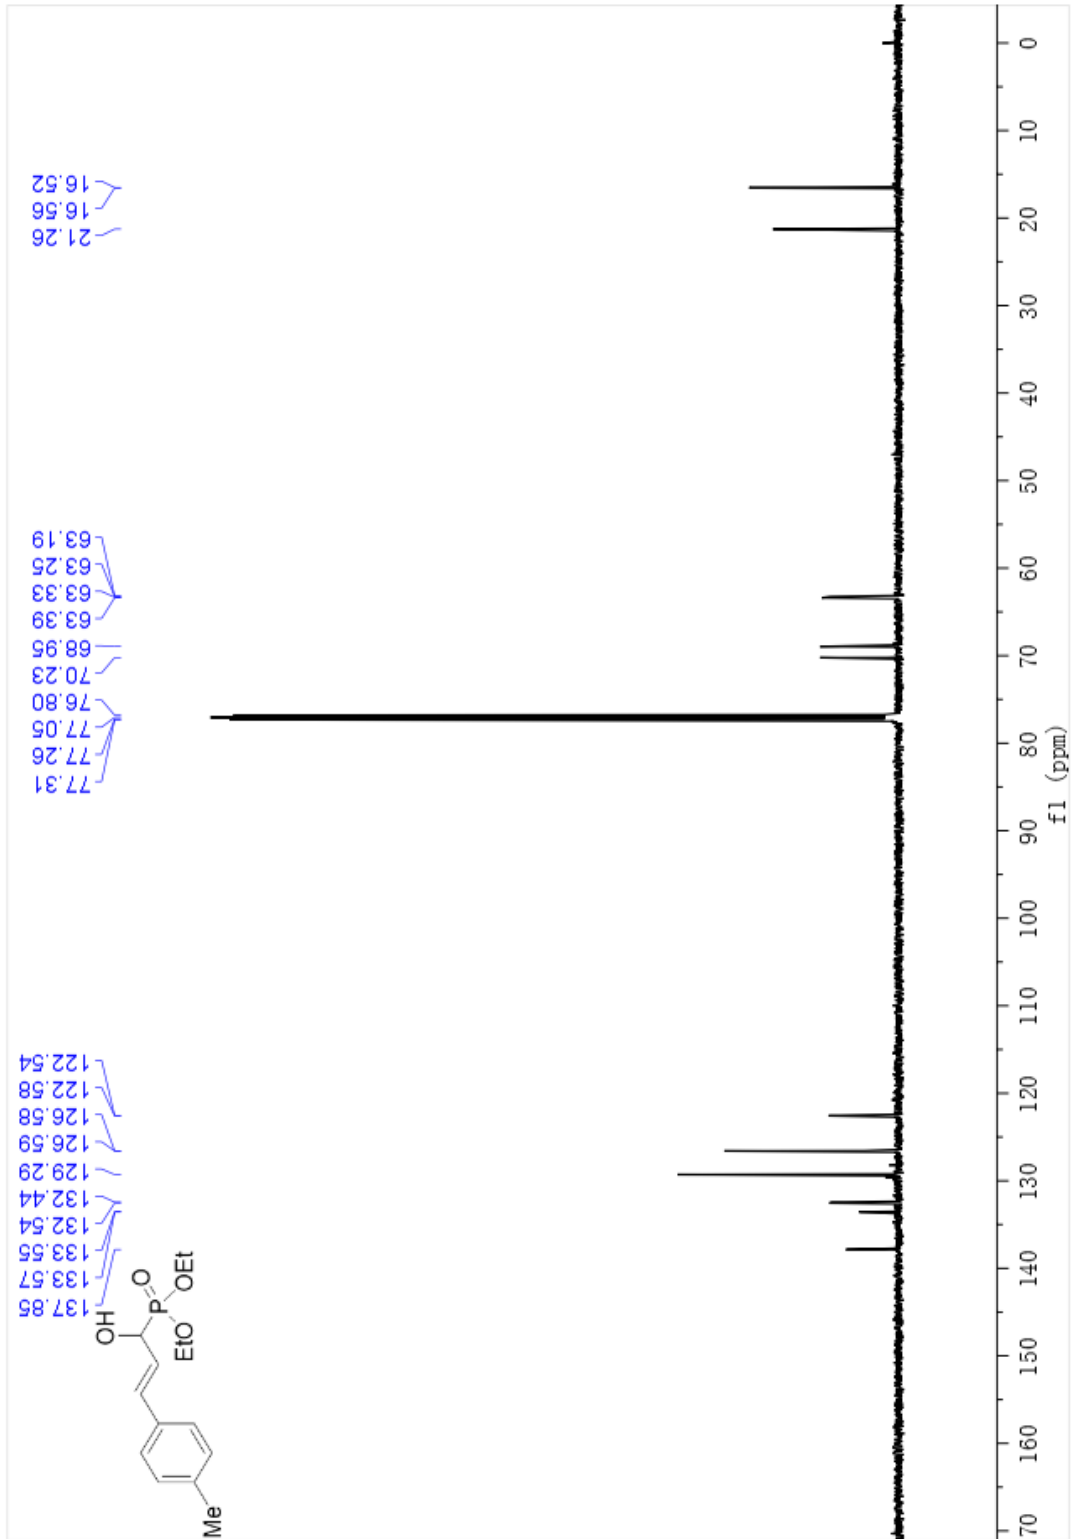

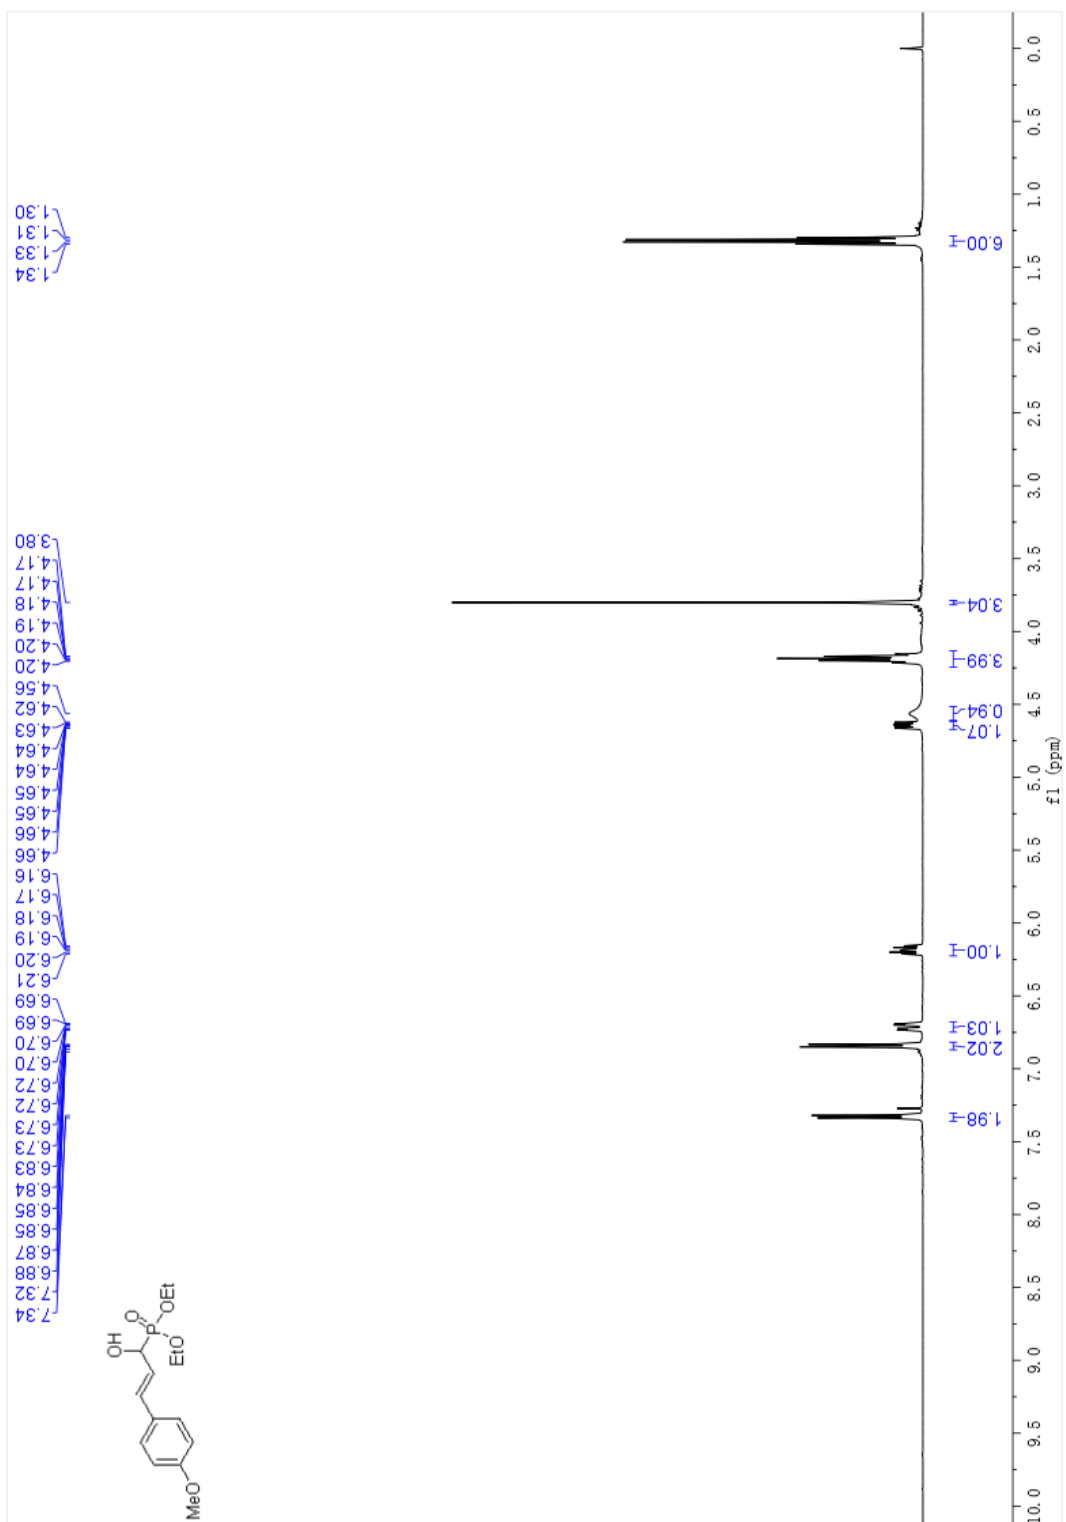

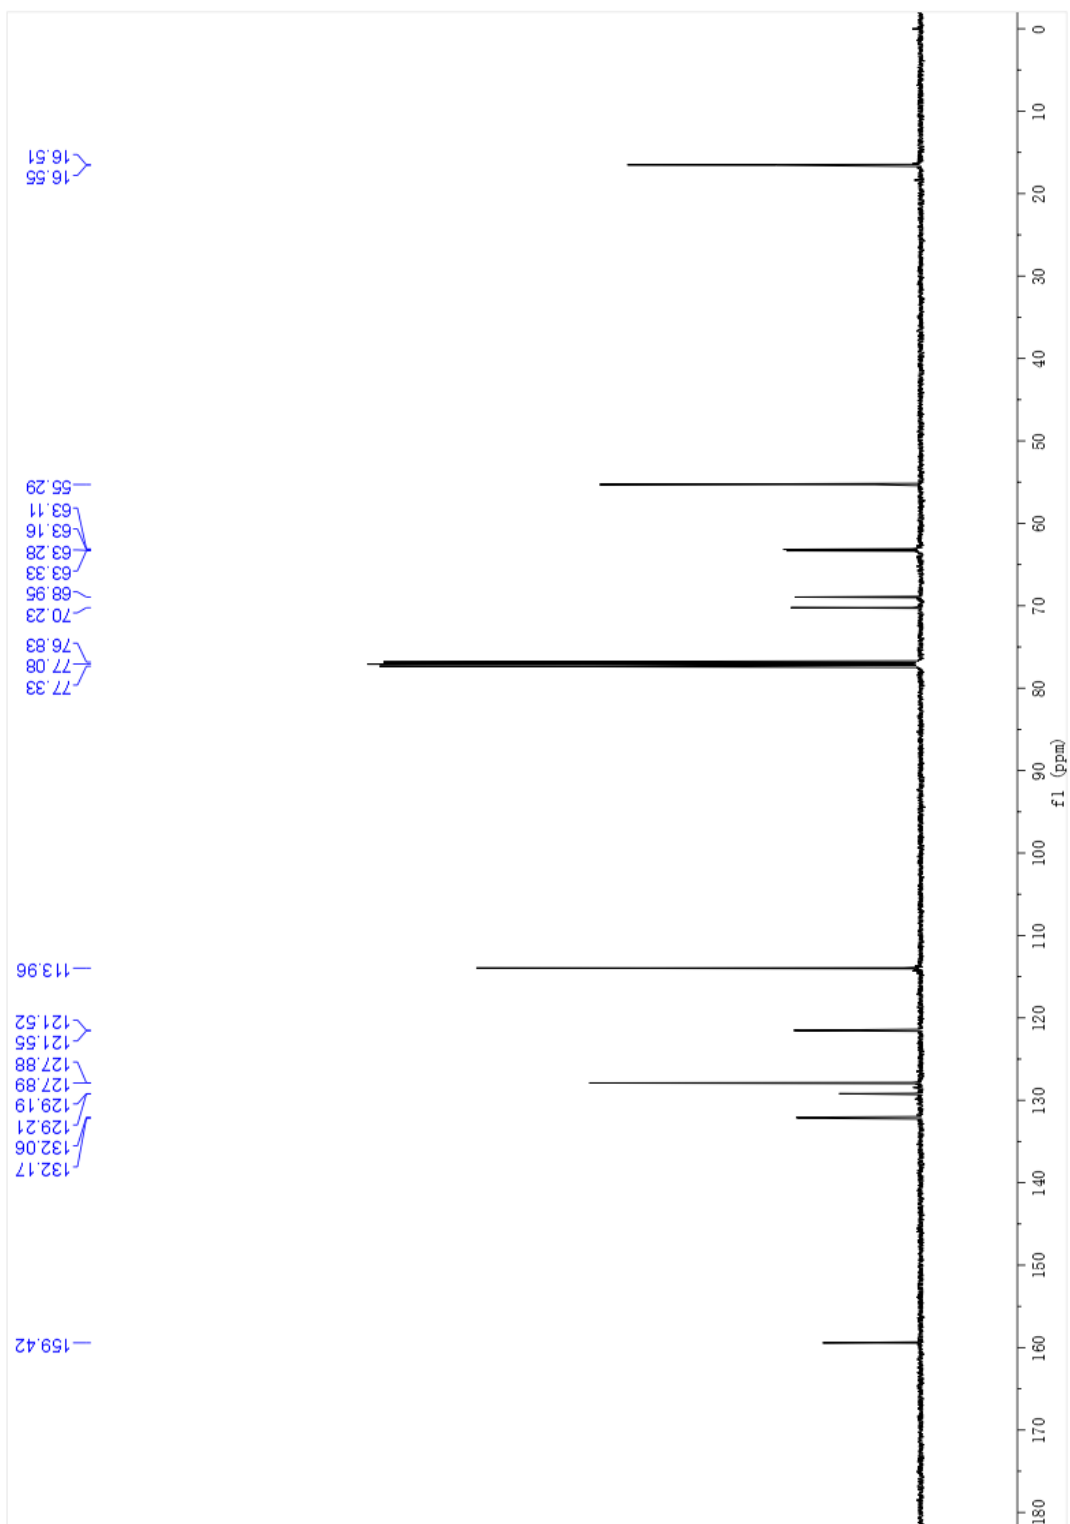

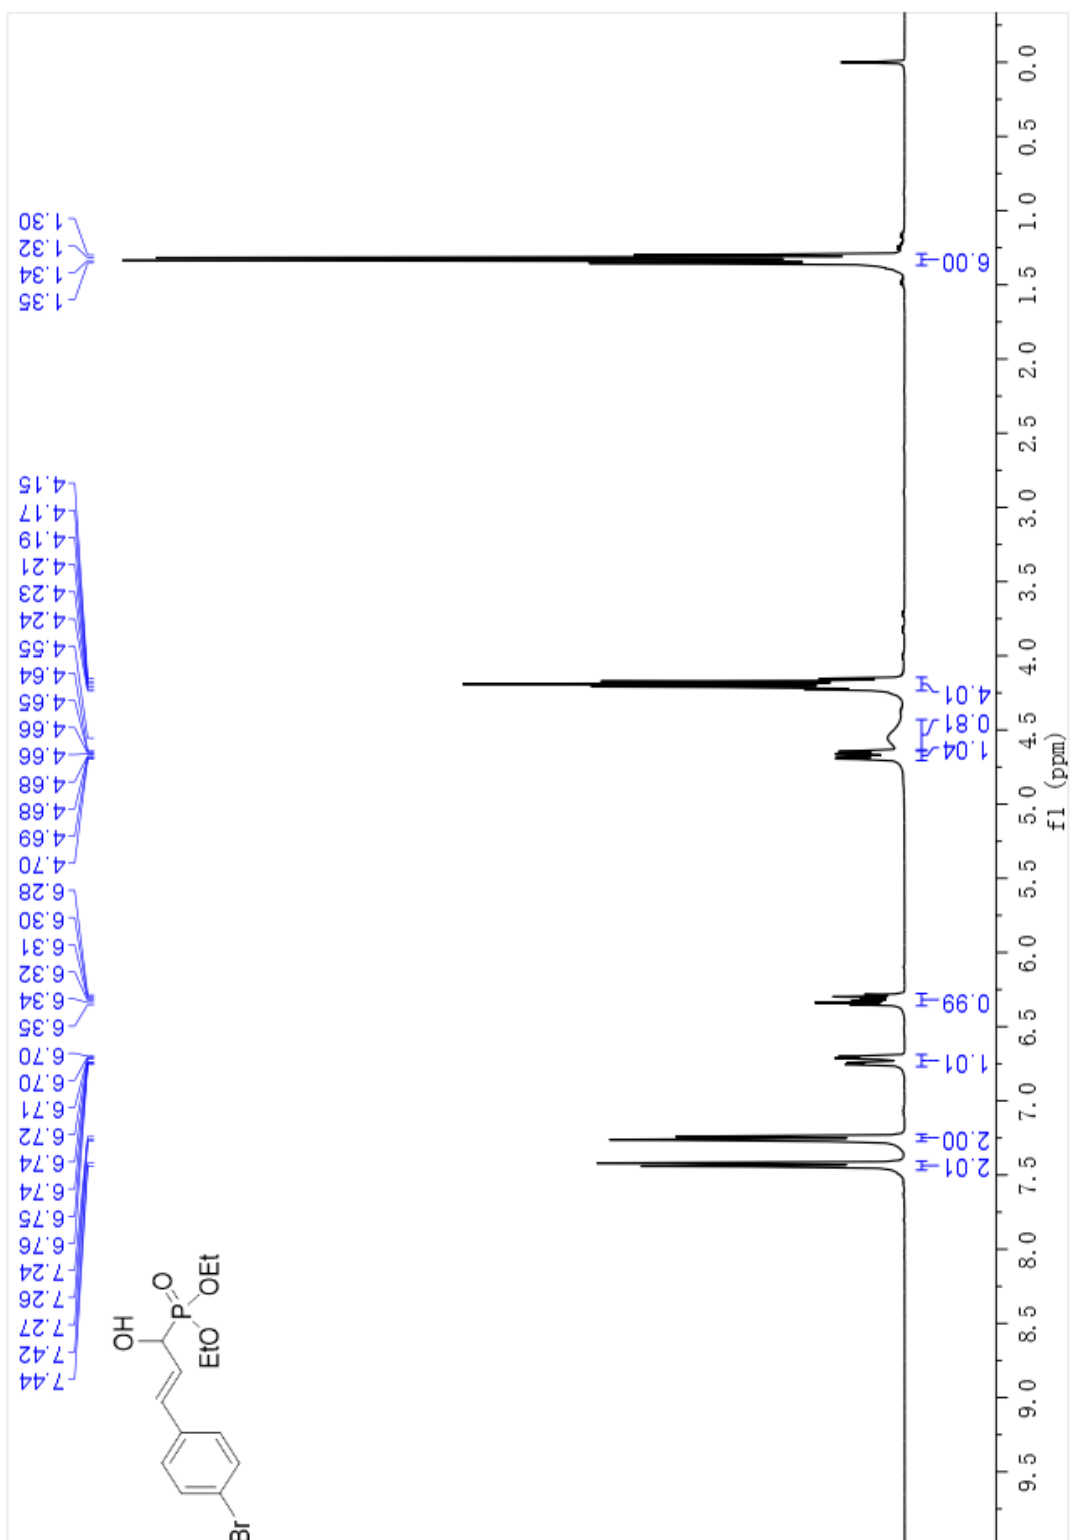

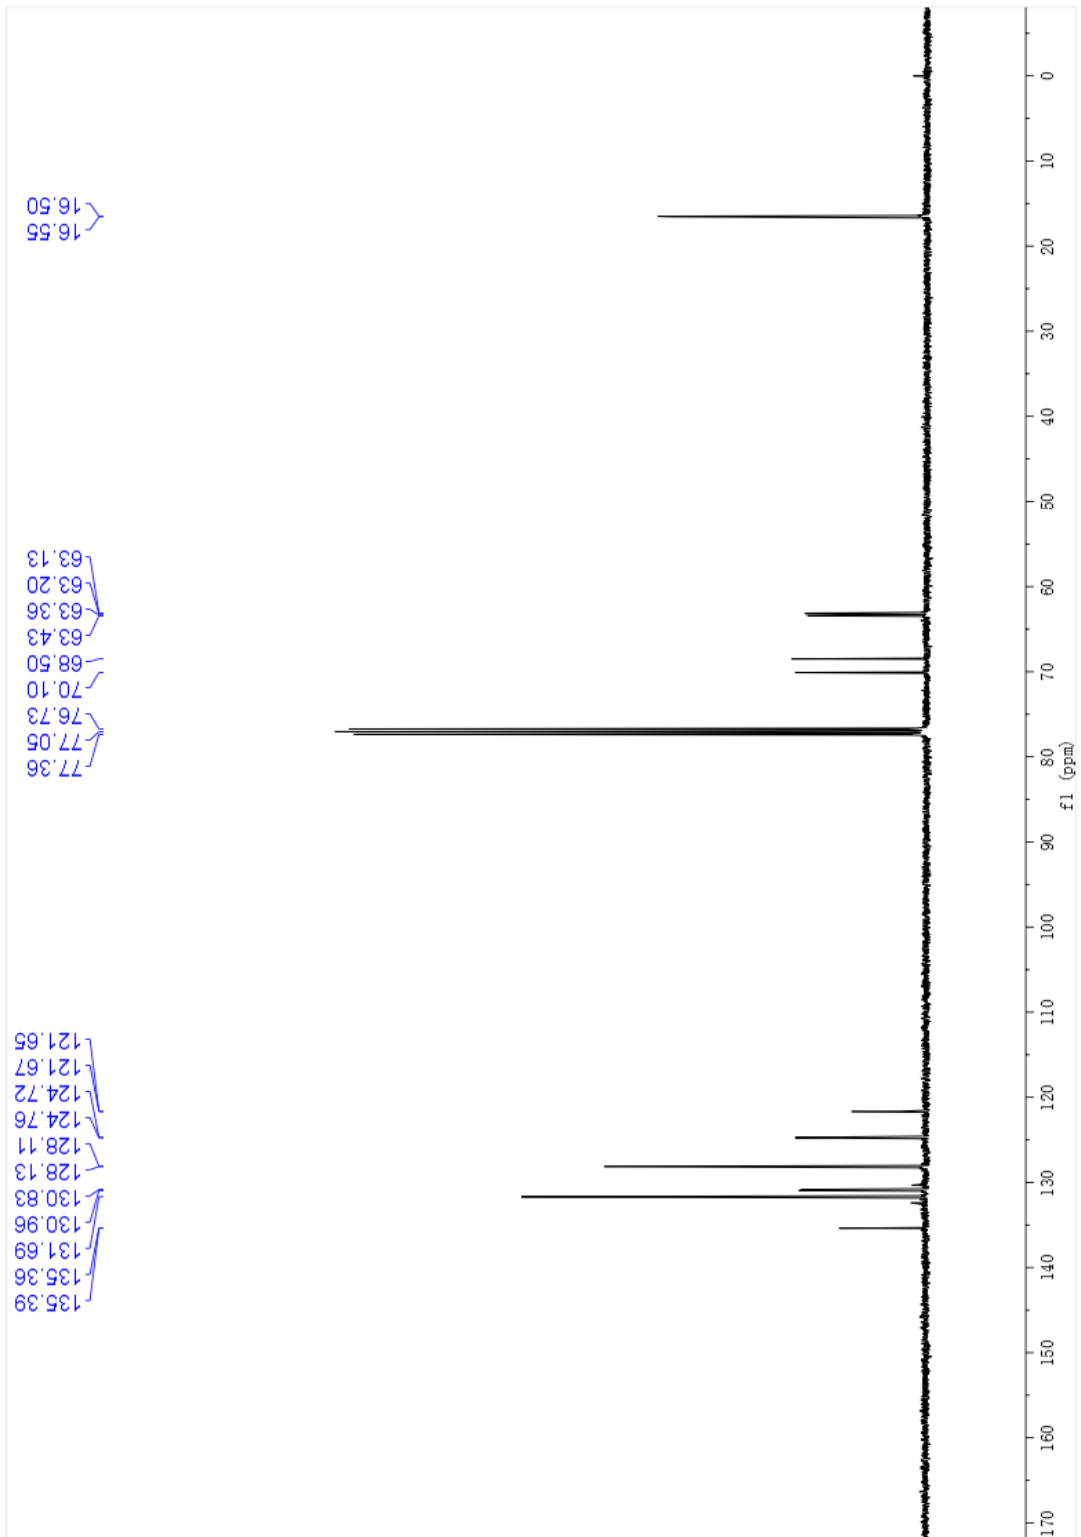

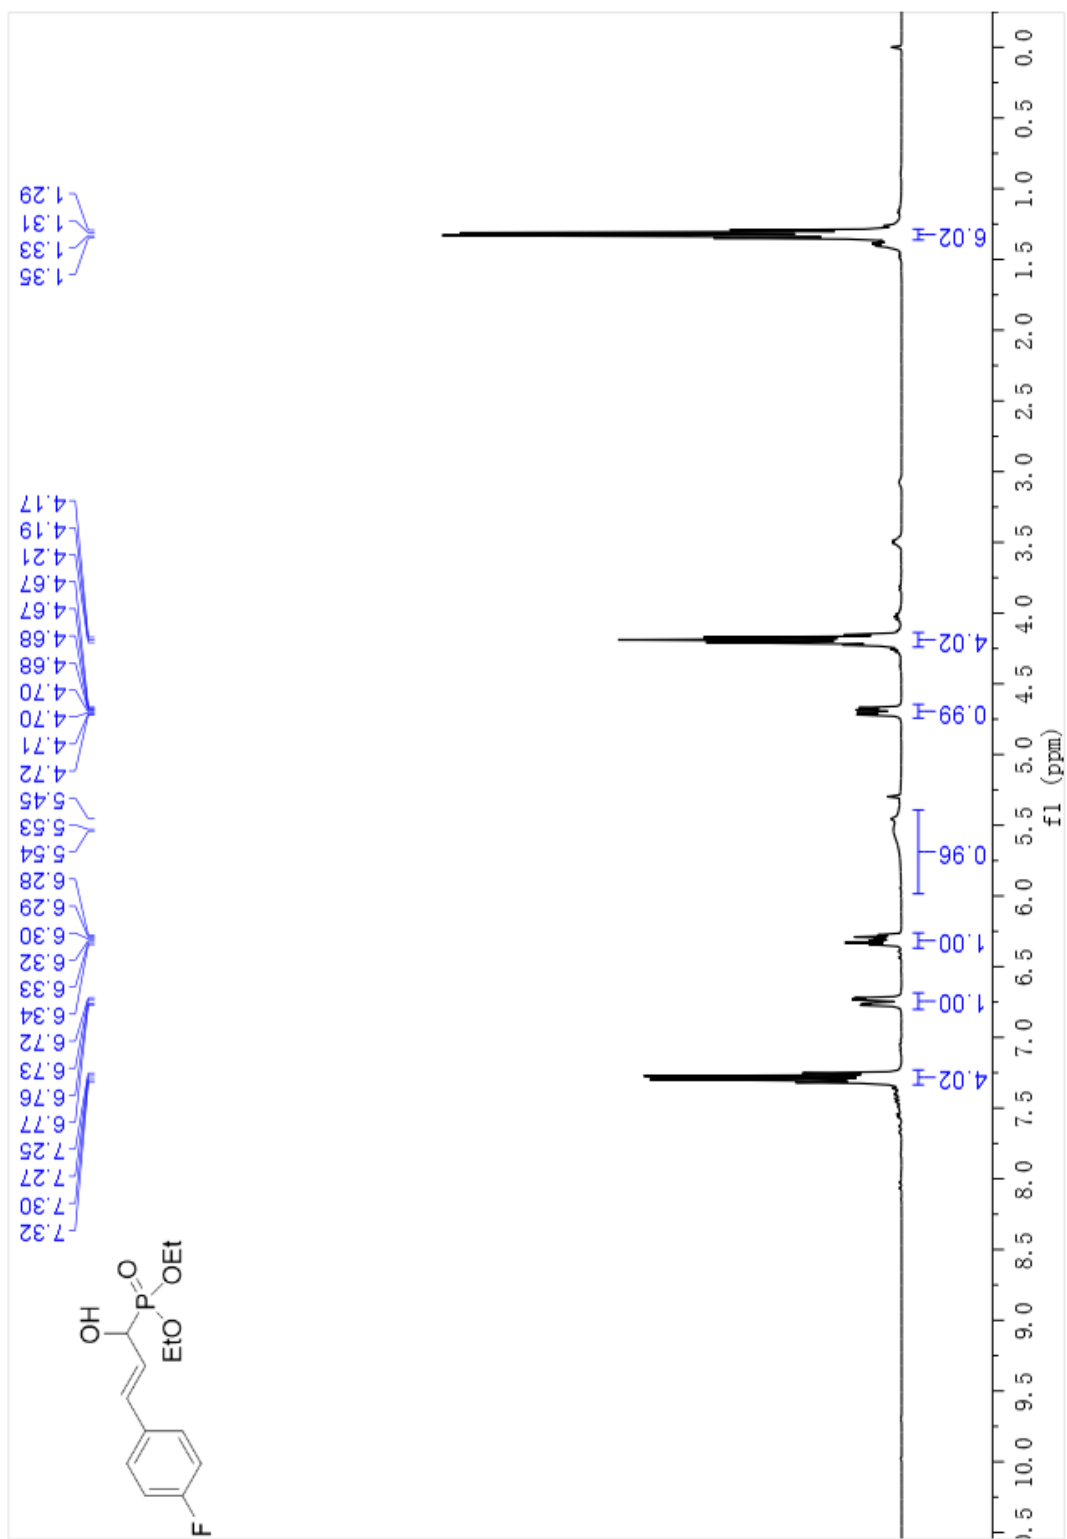

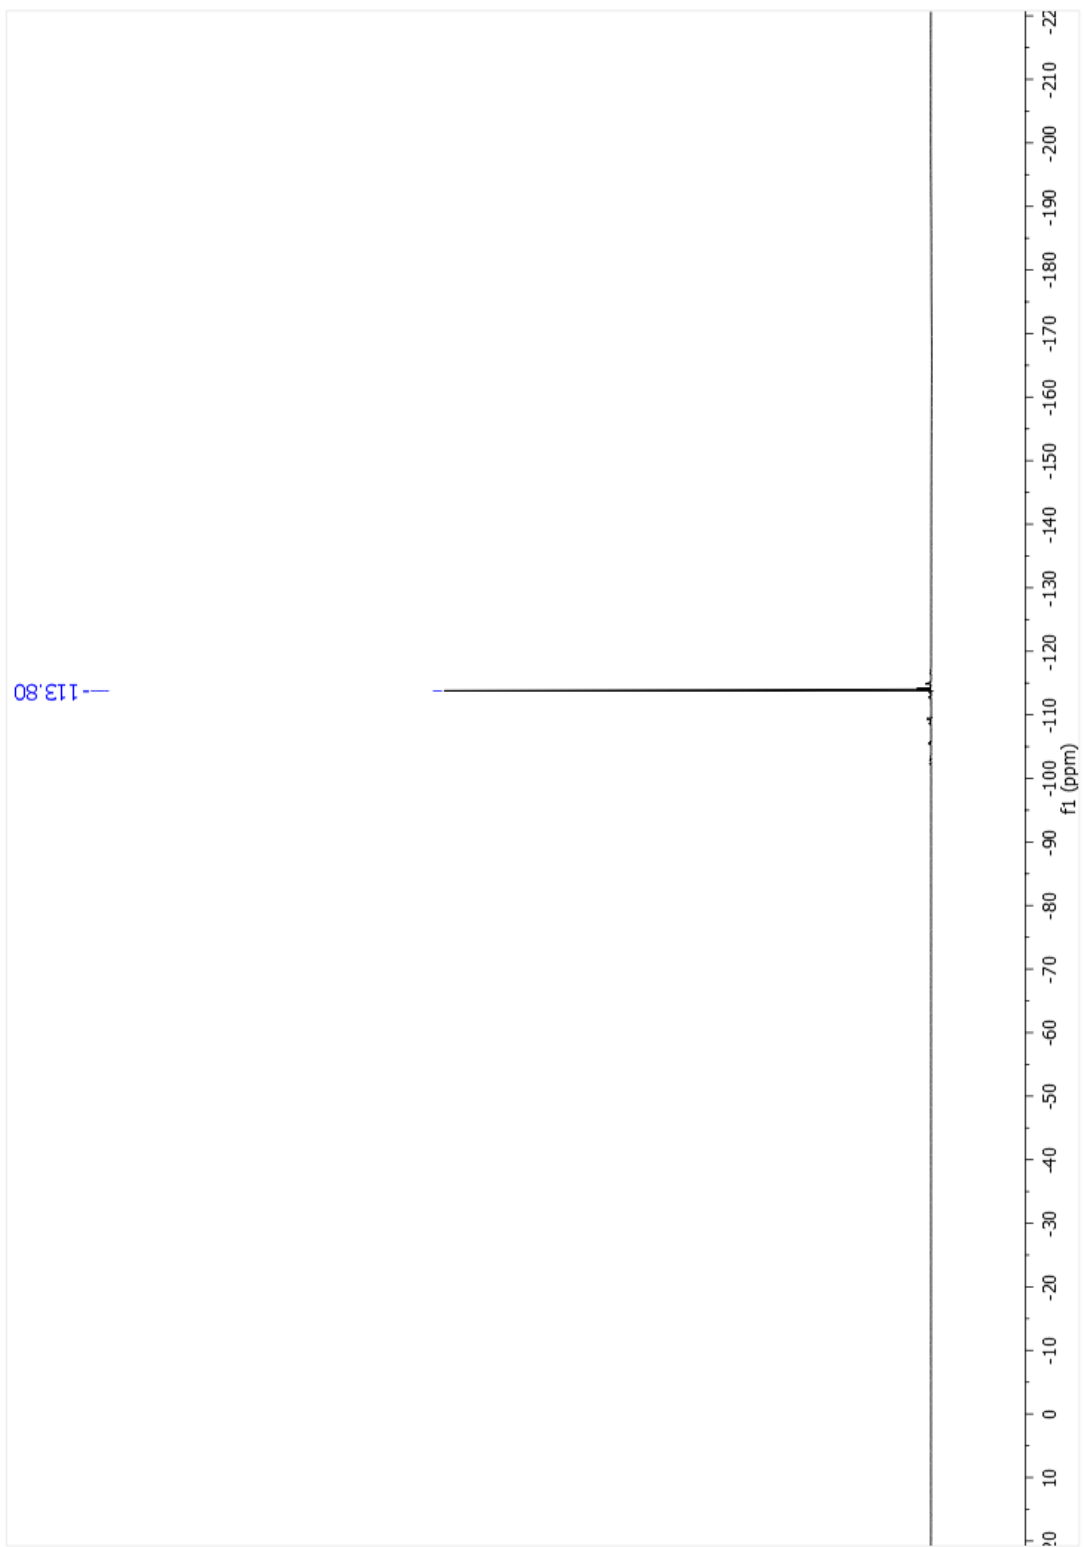



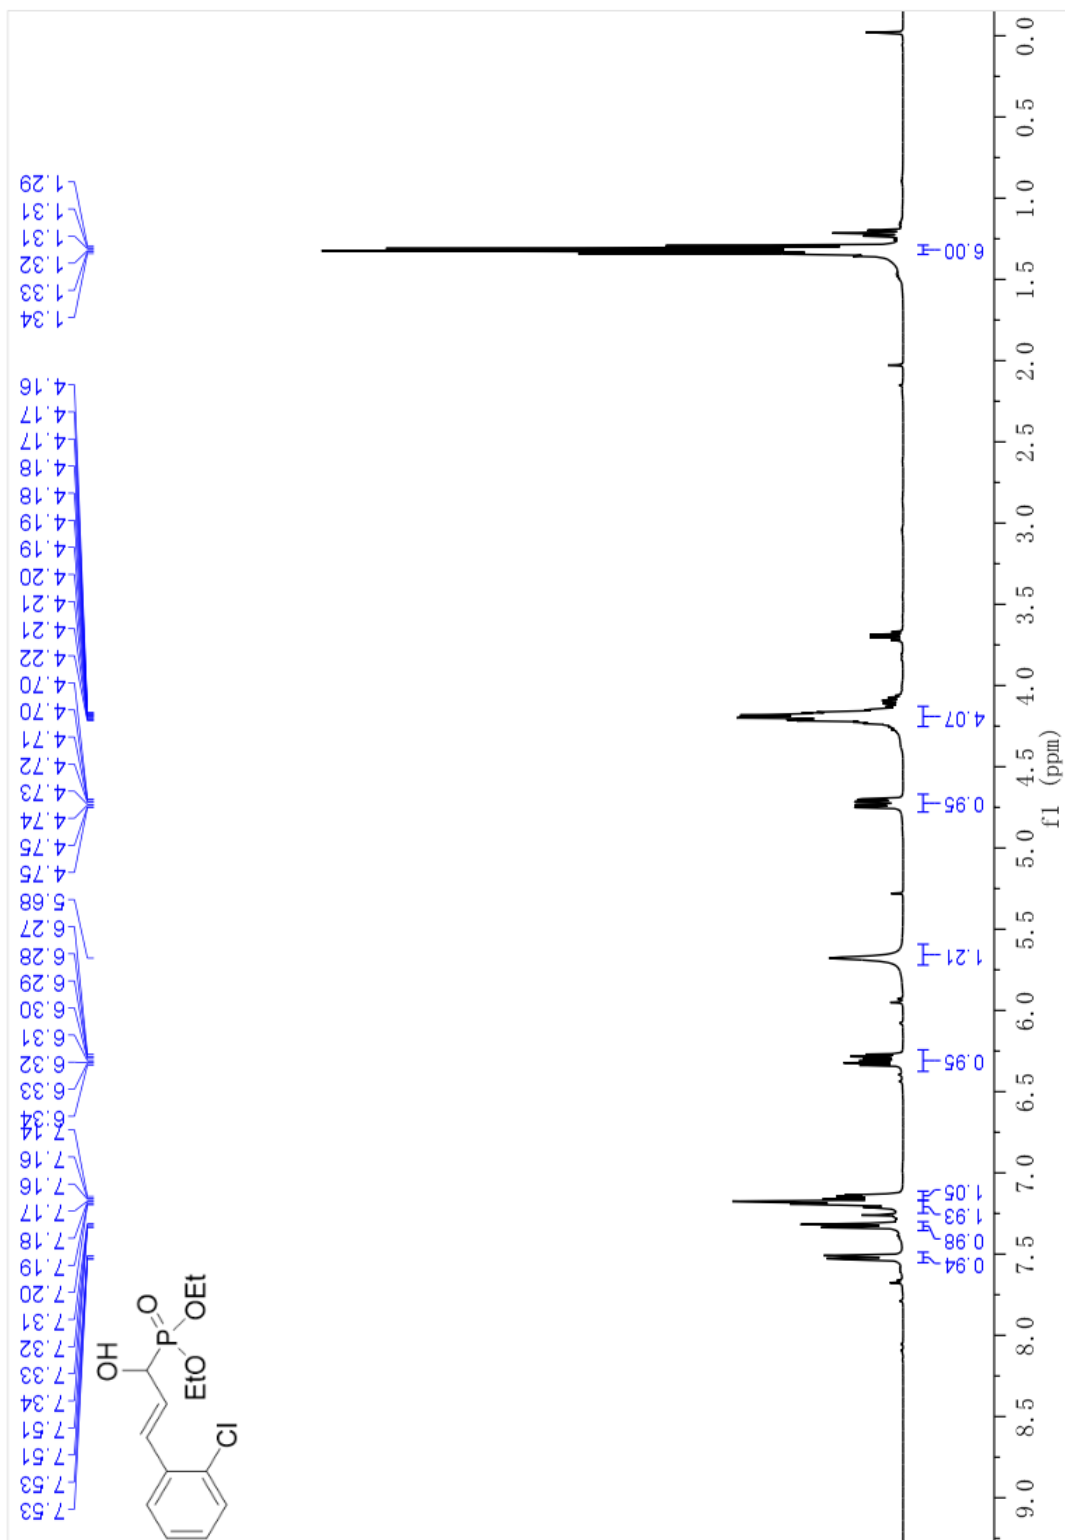

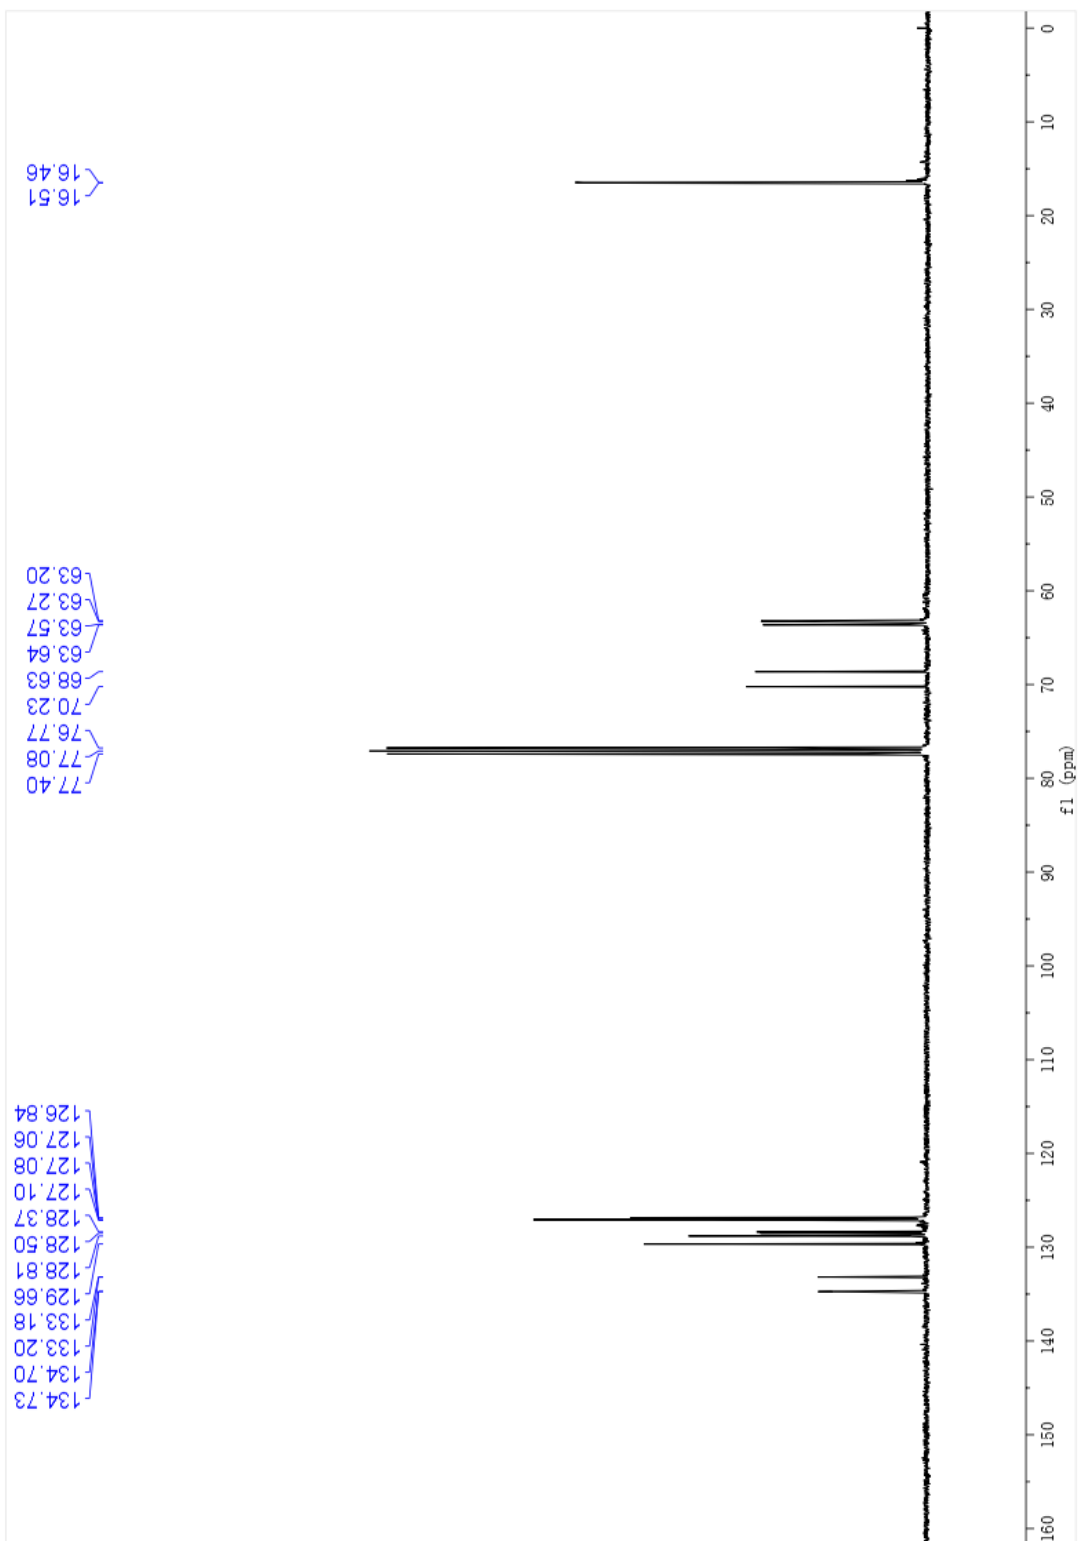

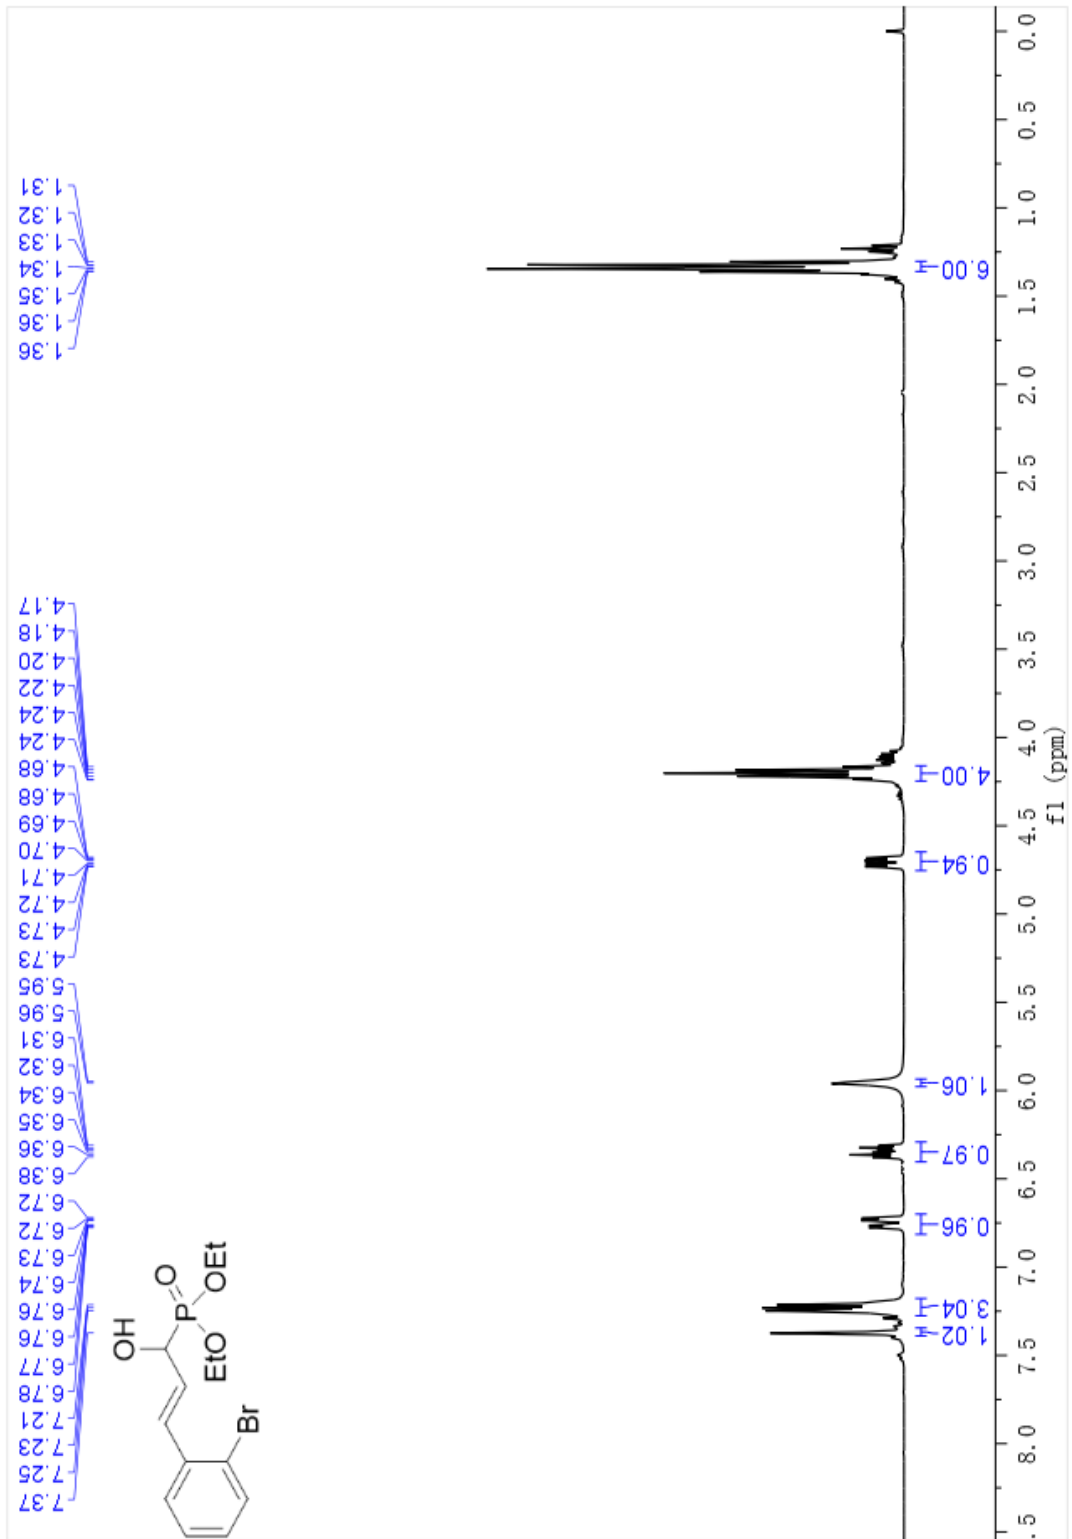

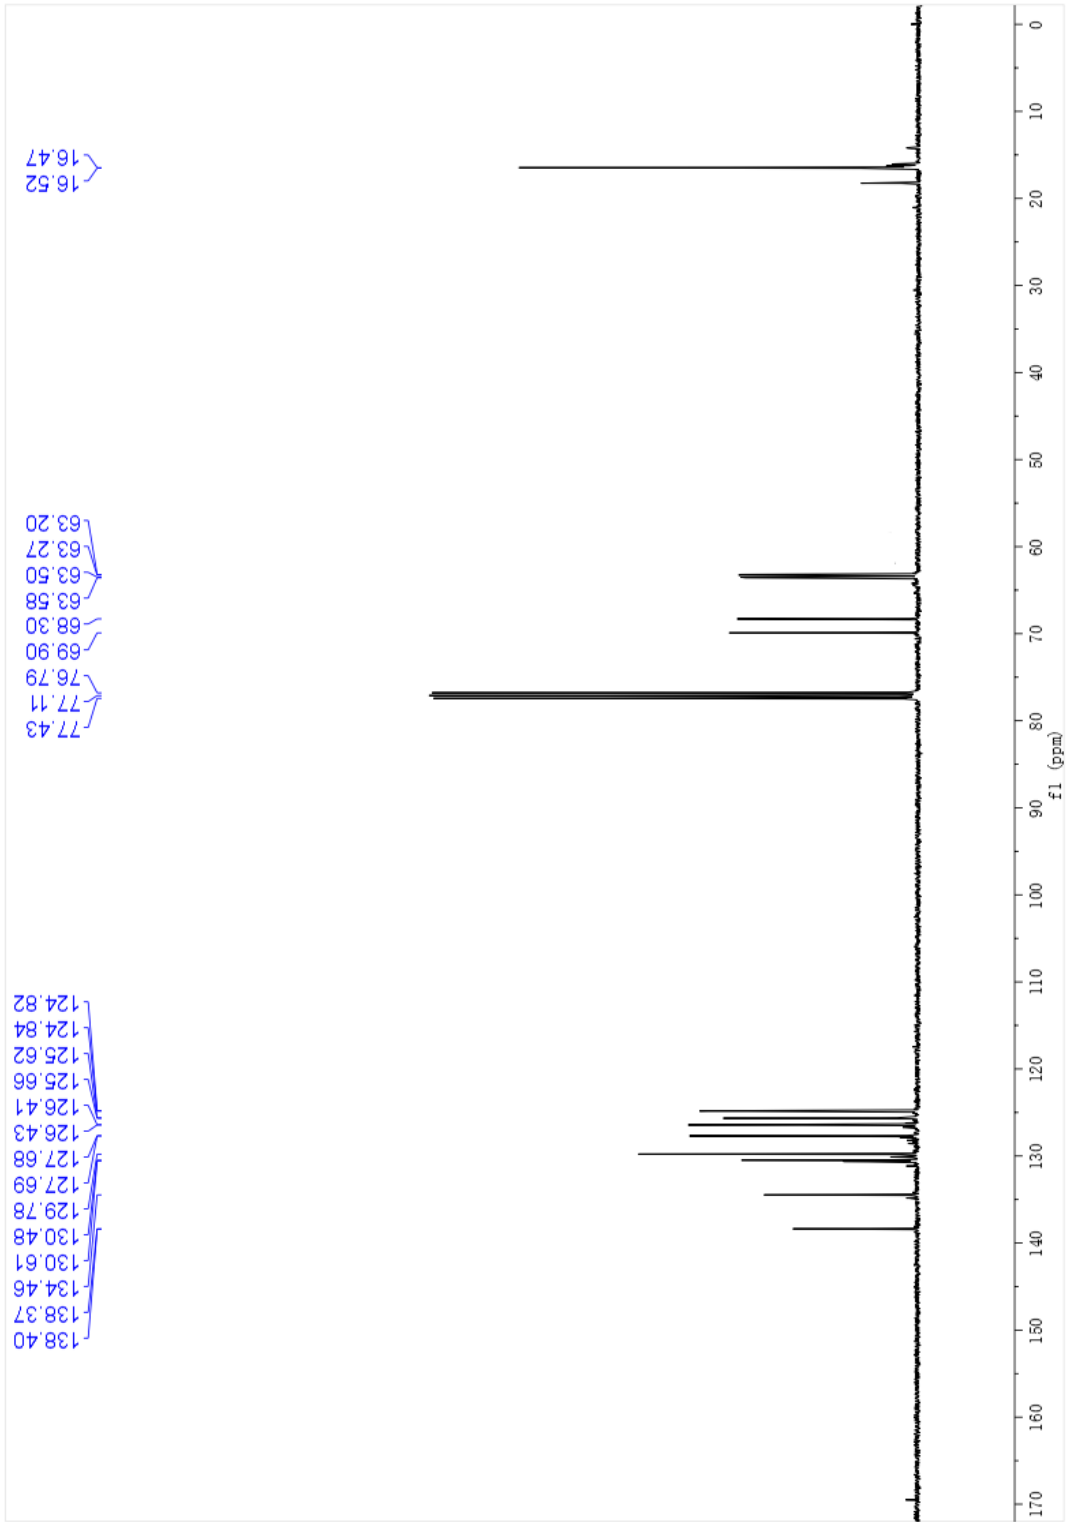

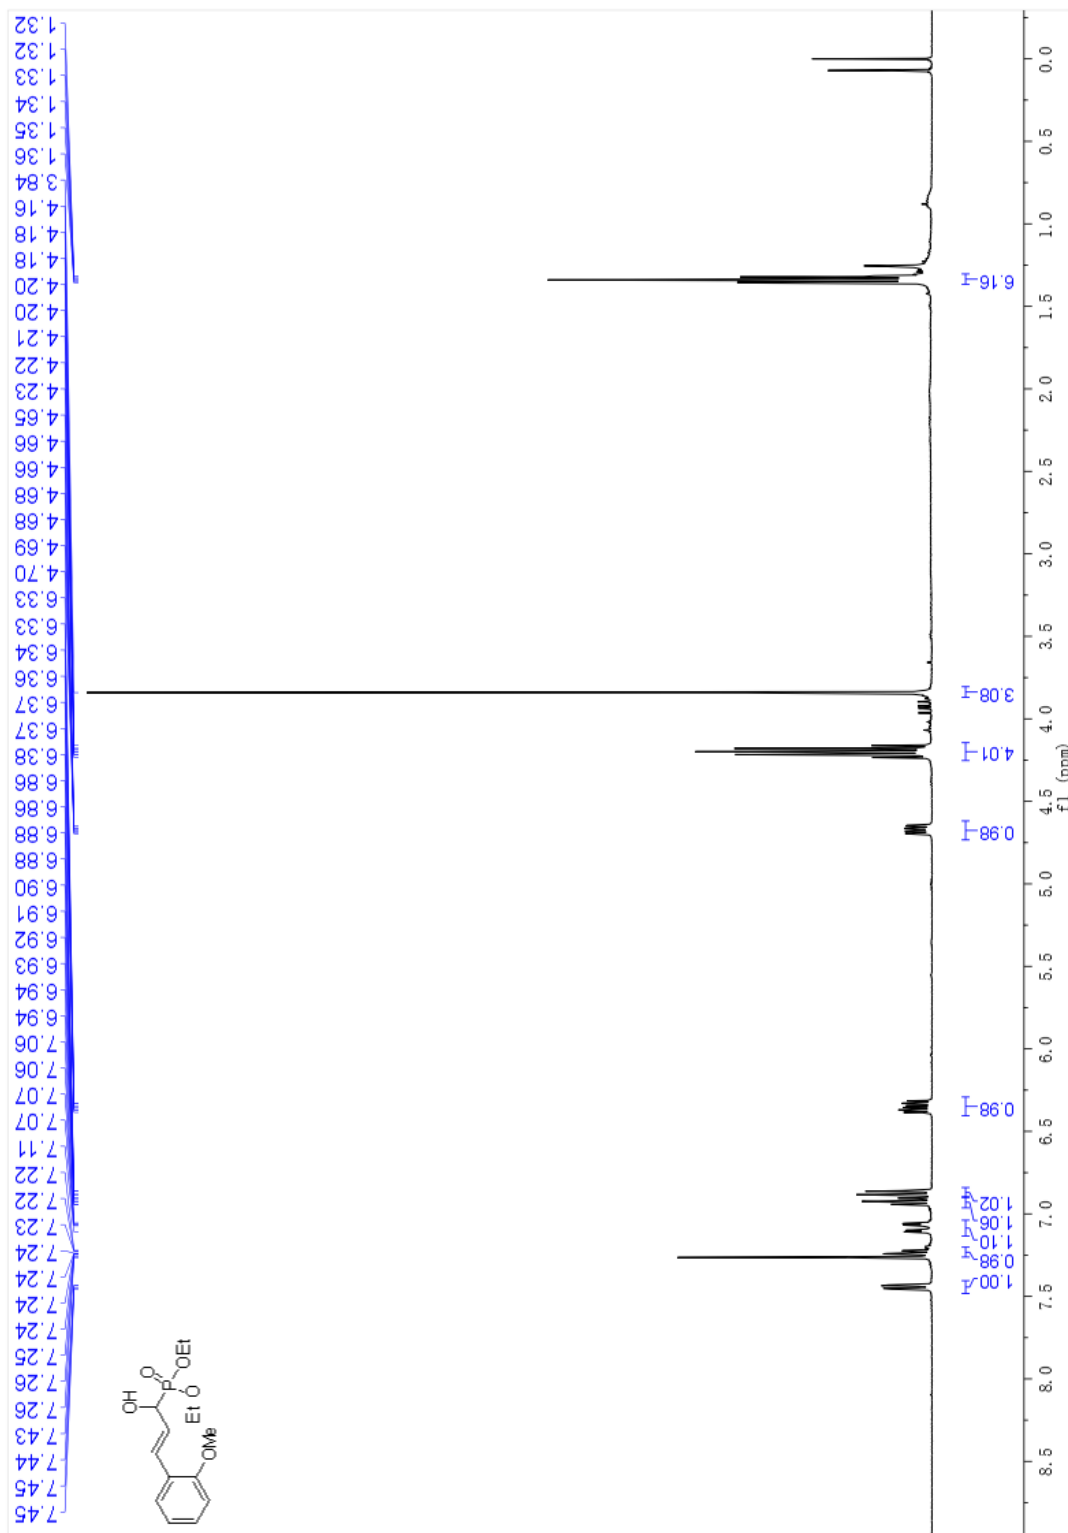

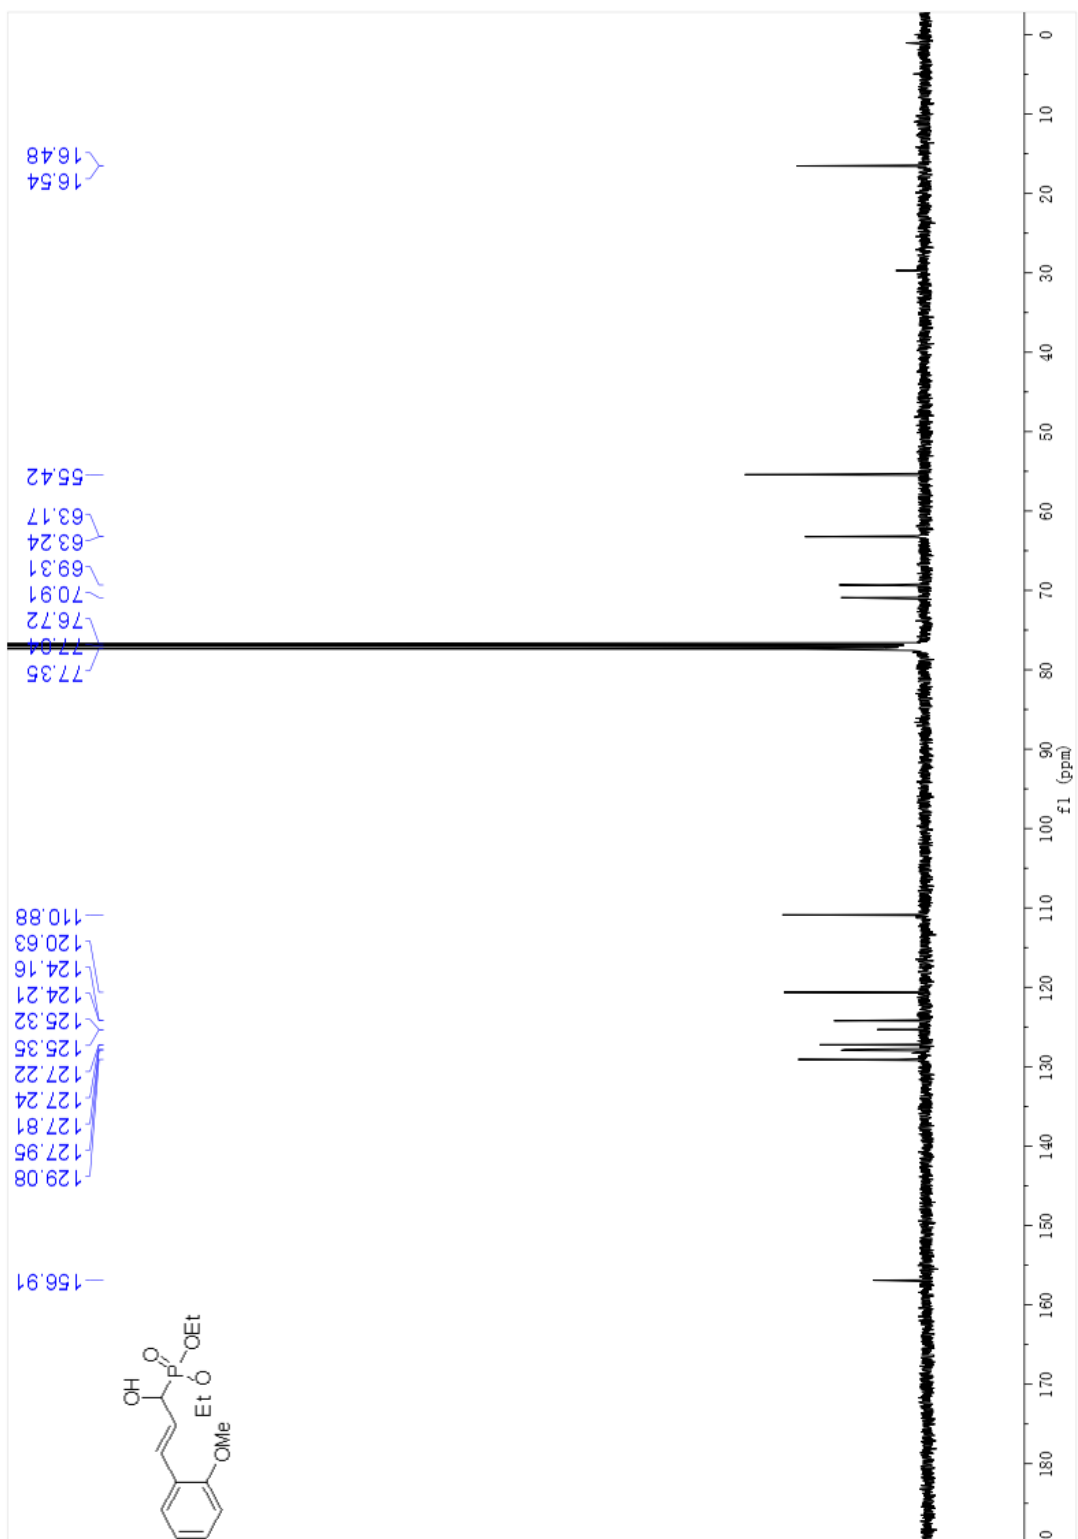

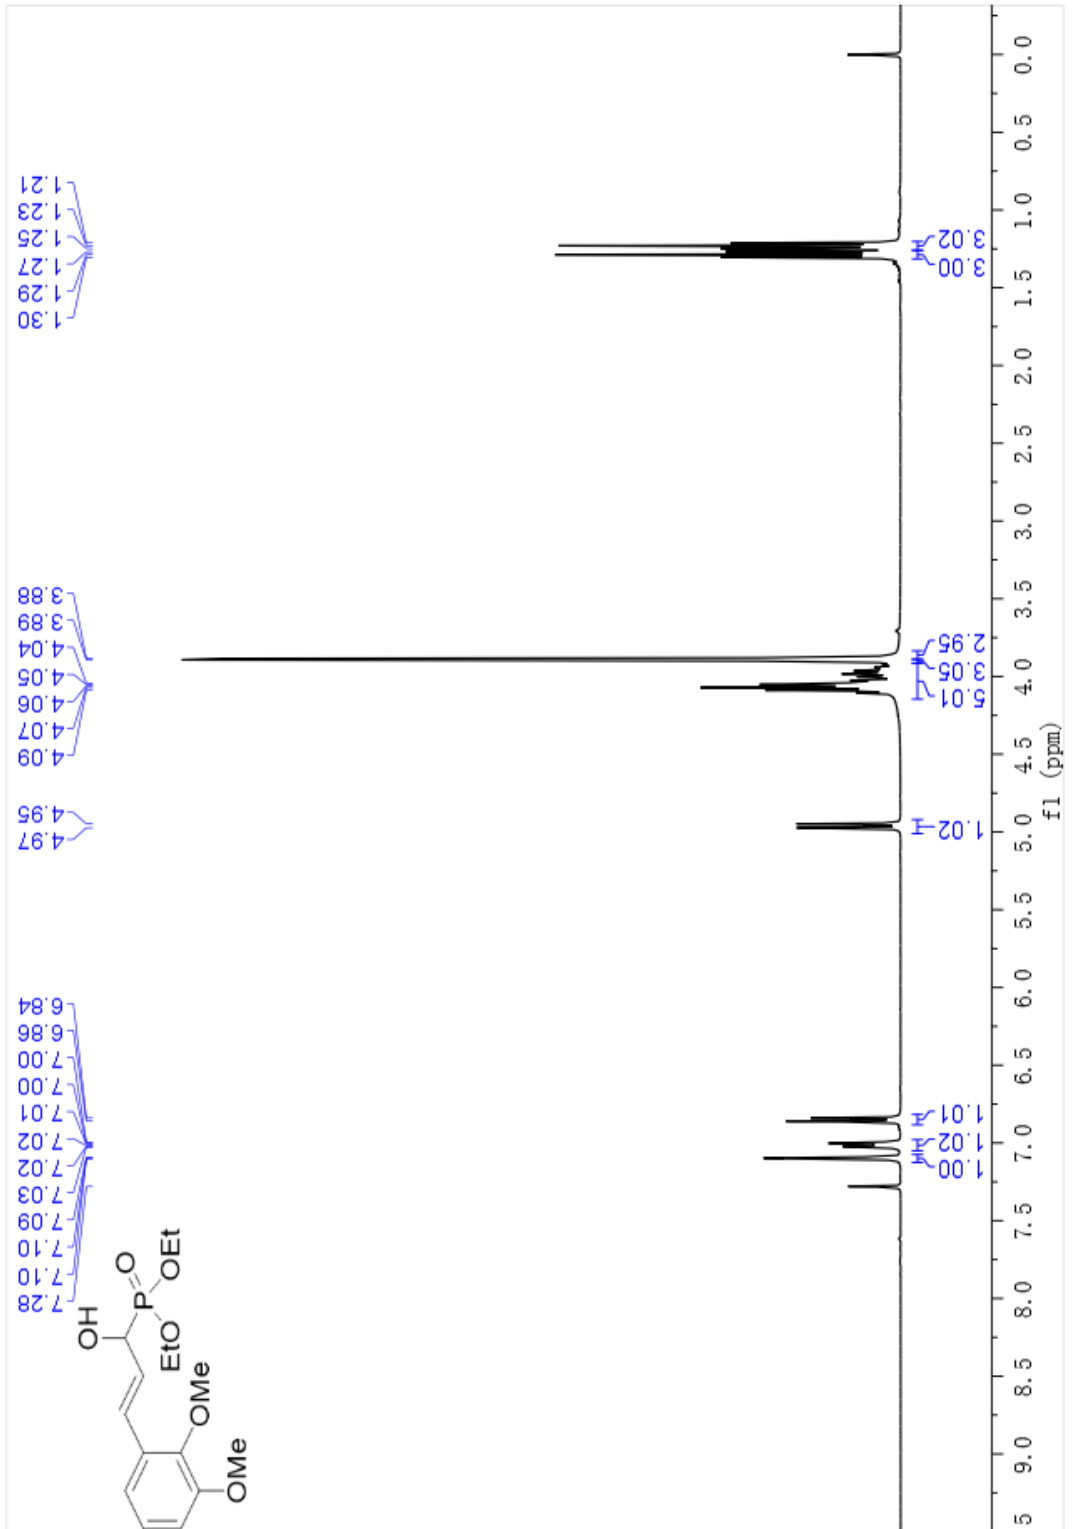

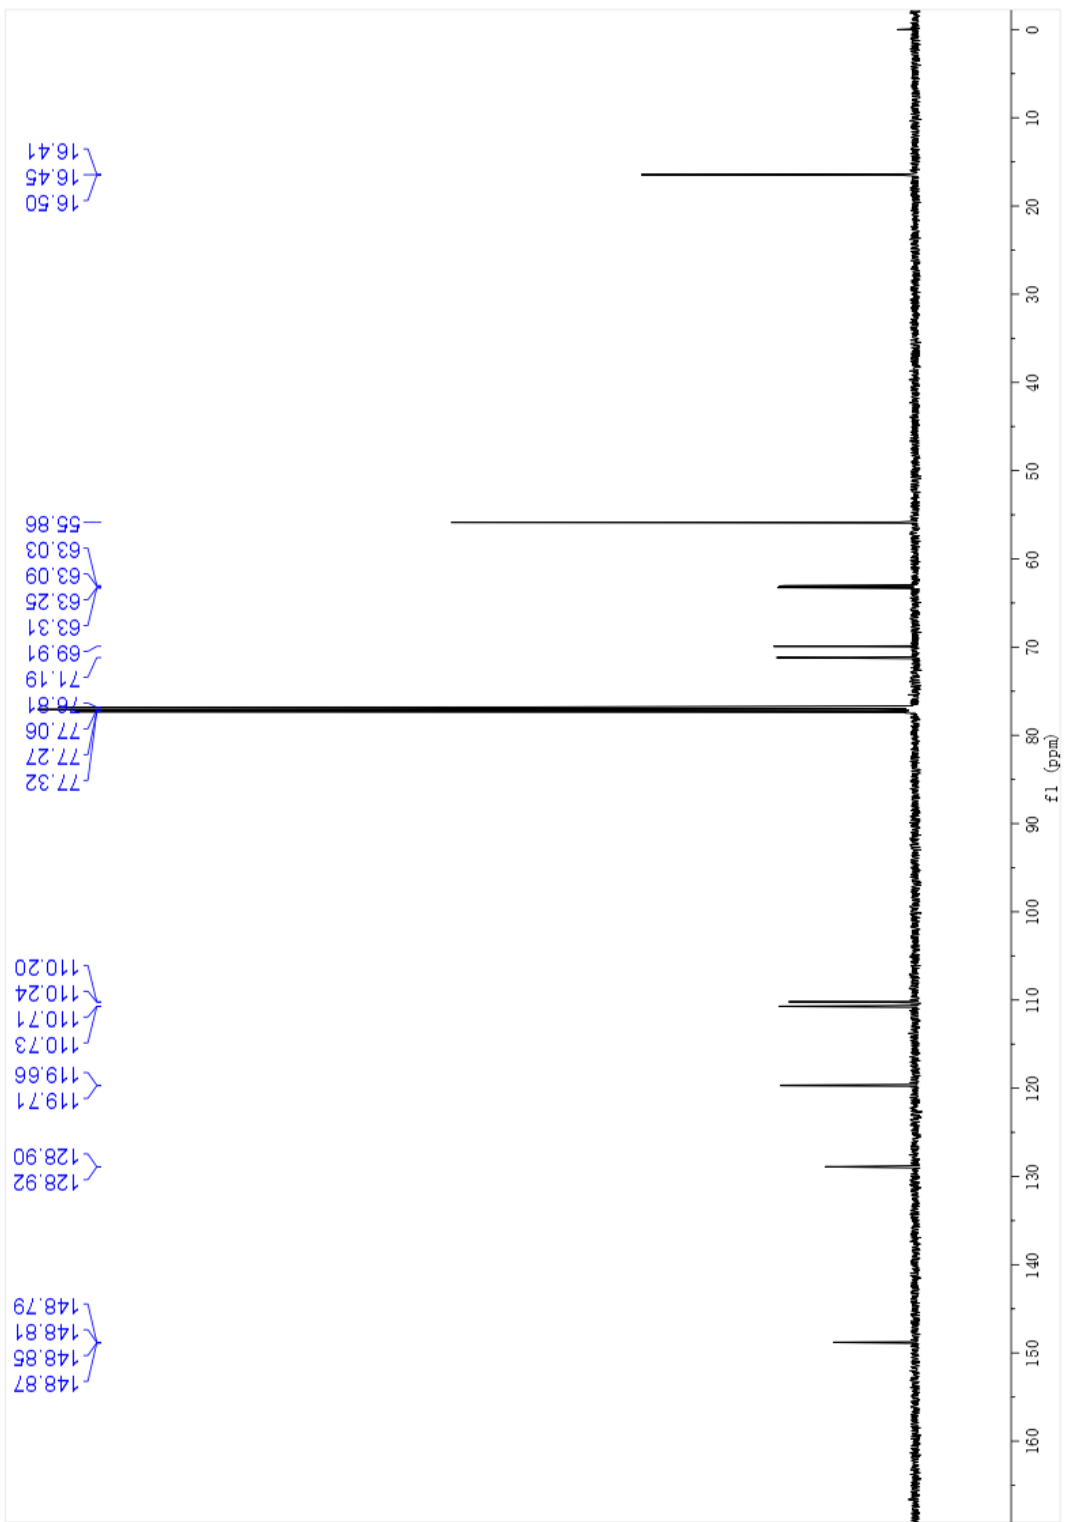



# NMR Spectra of Phosphate Ester Substrates

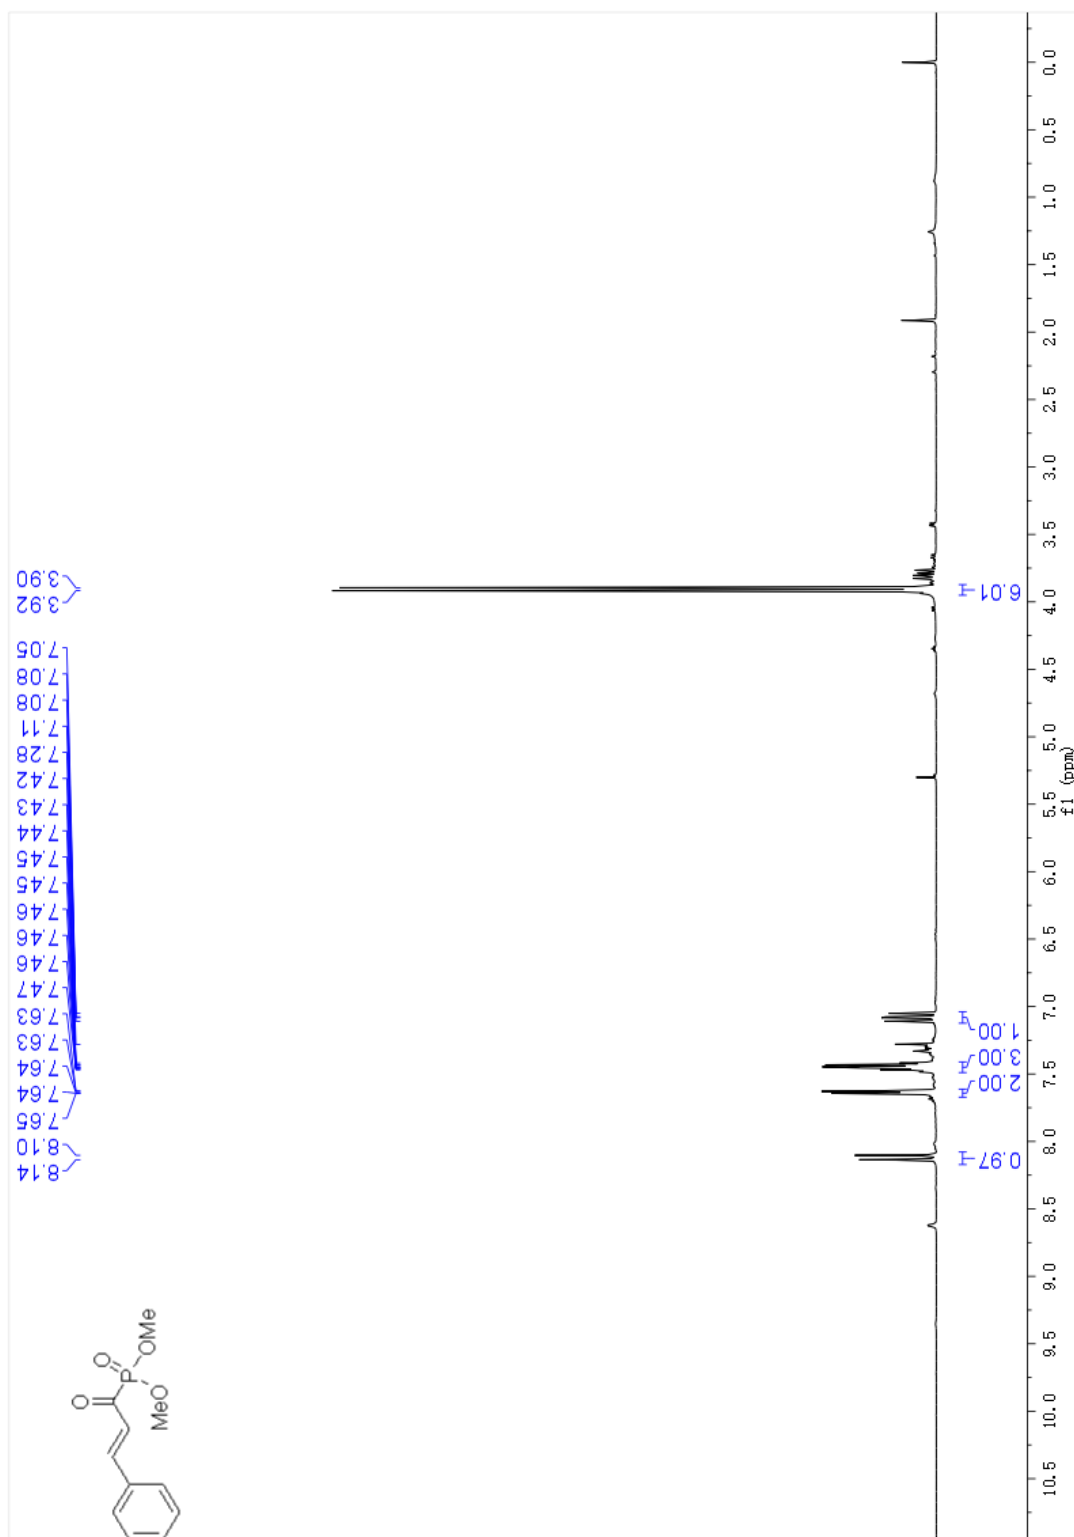

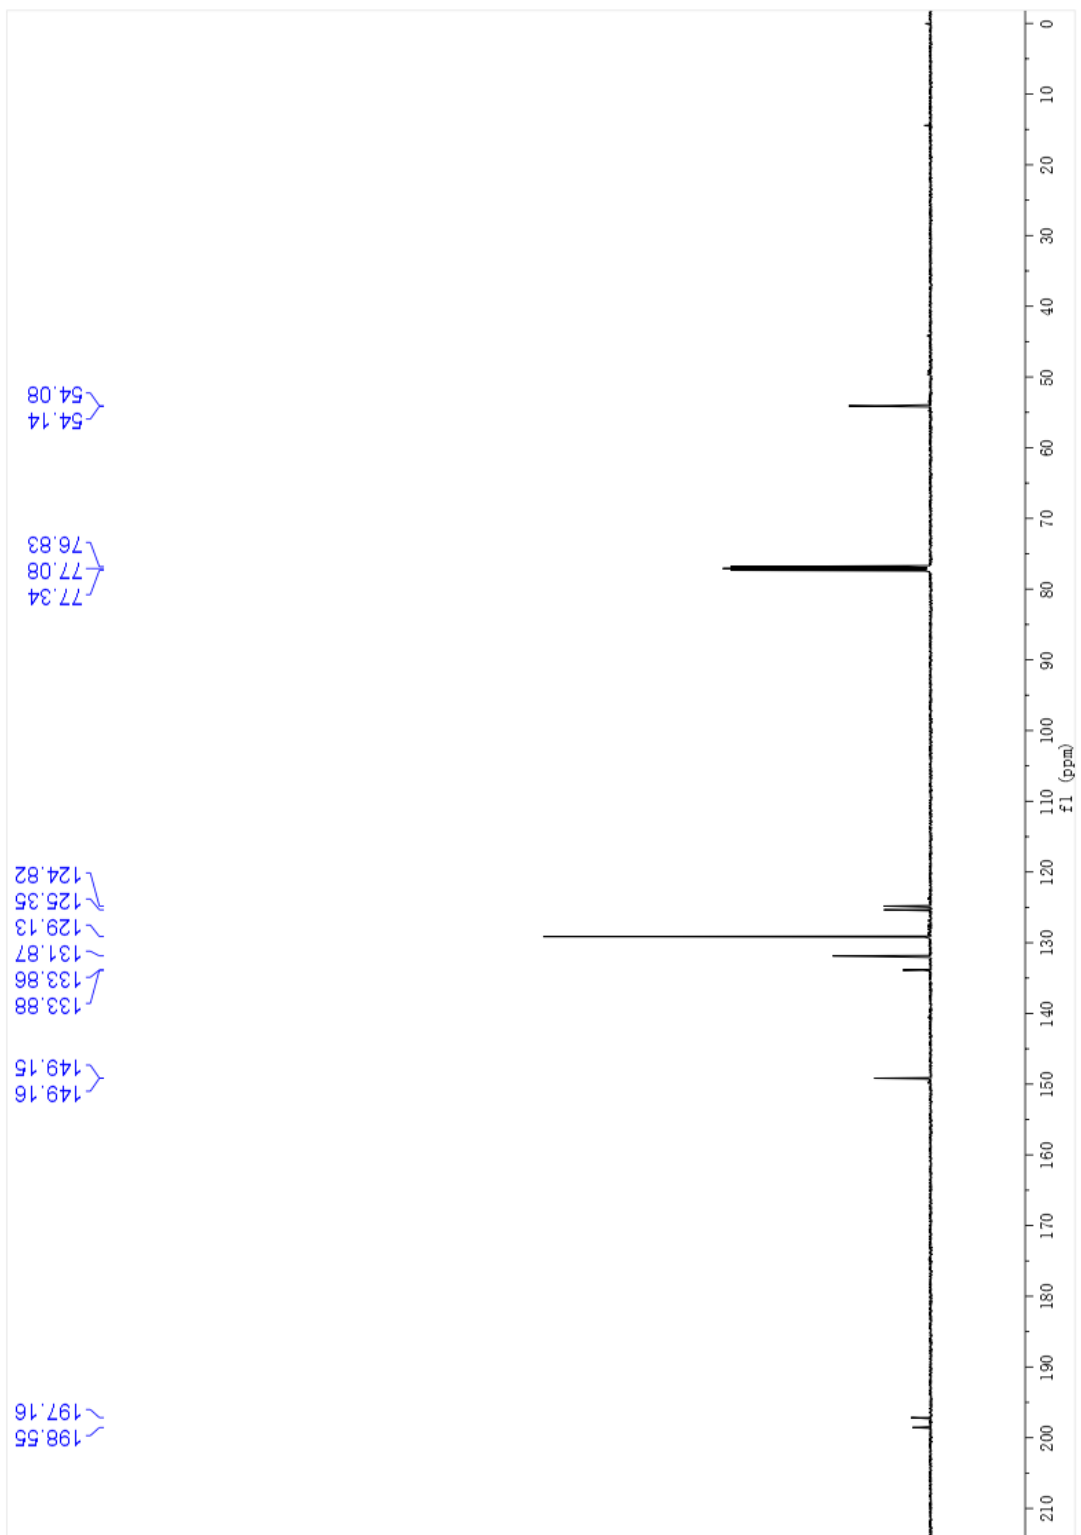

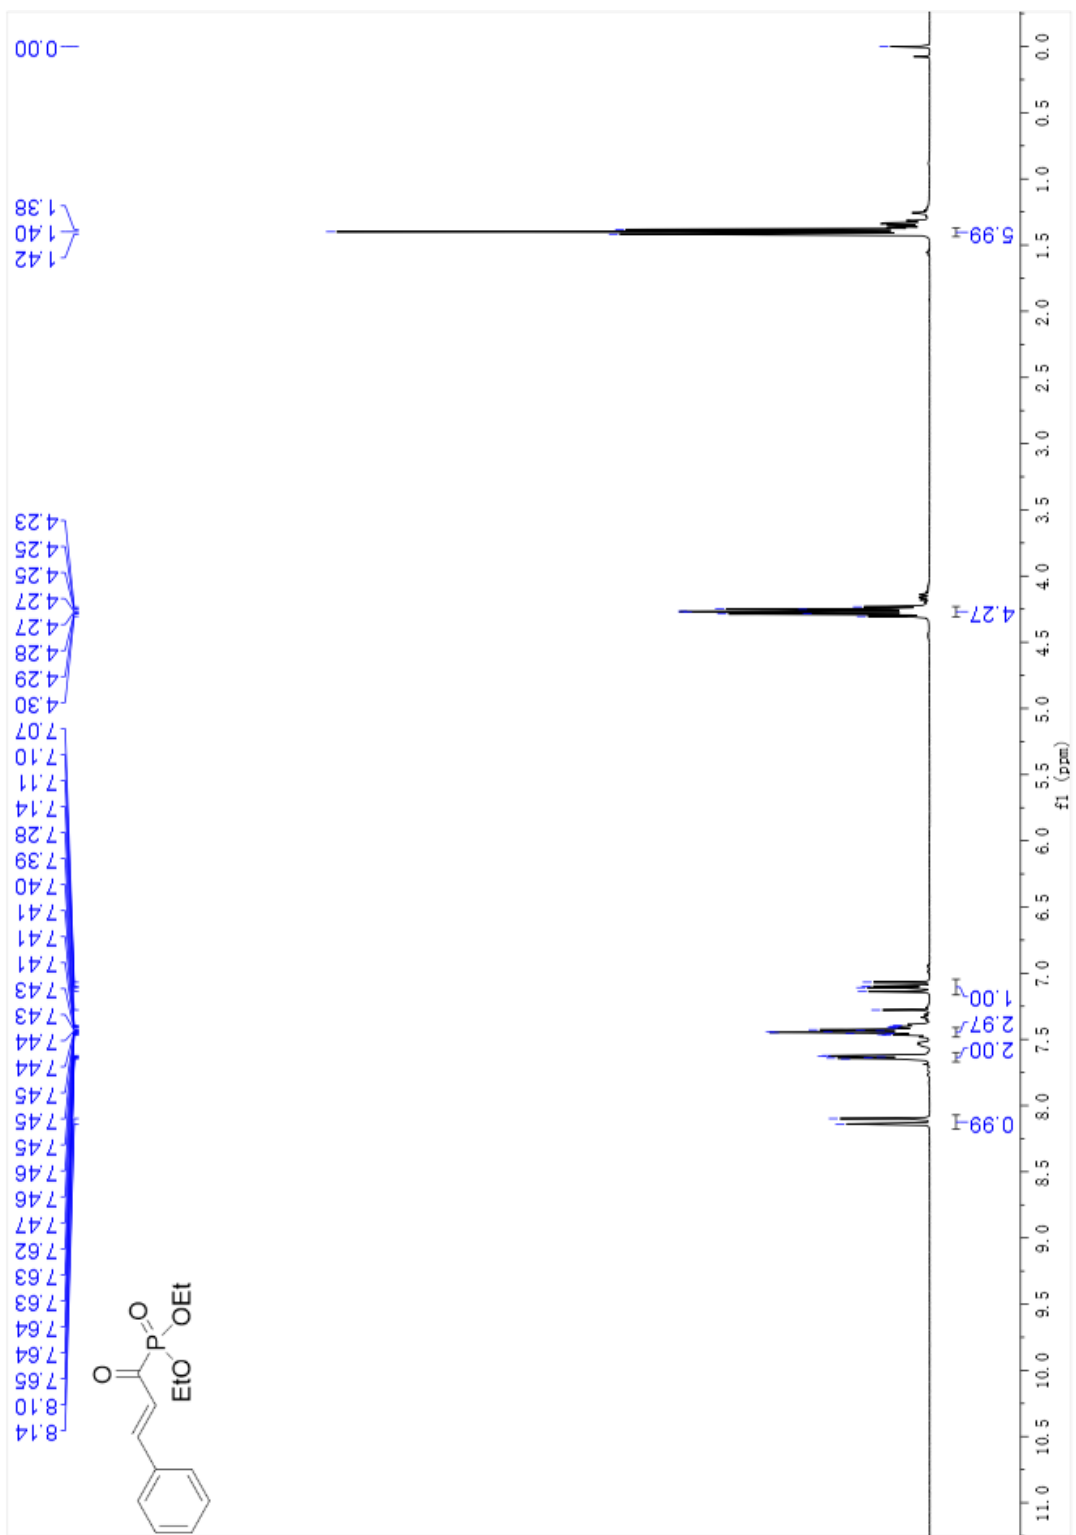

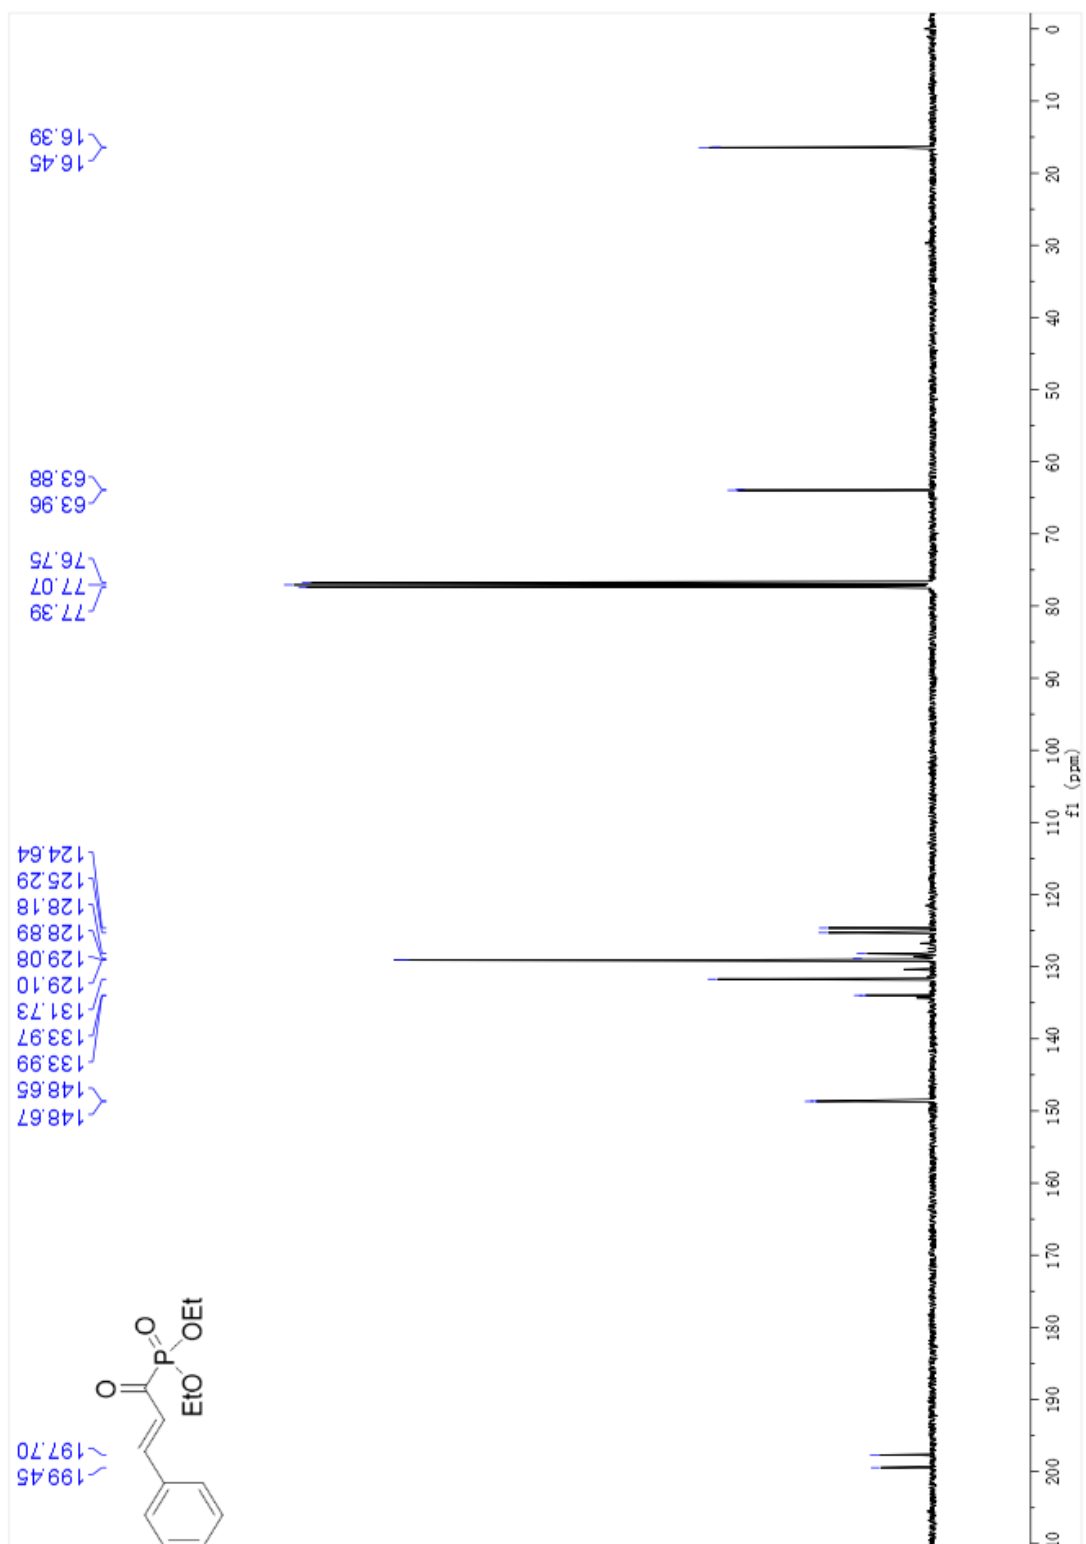

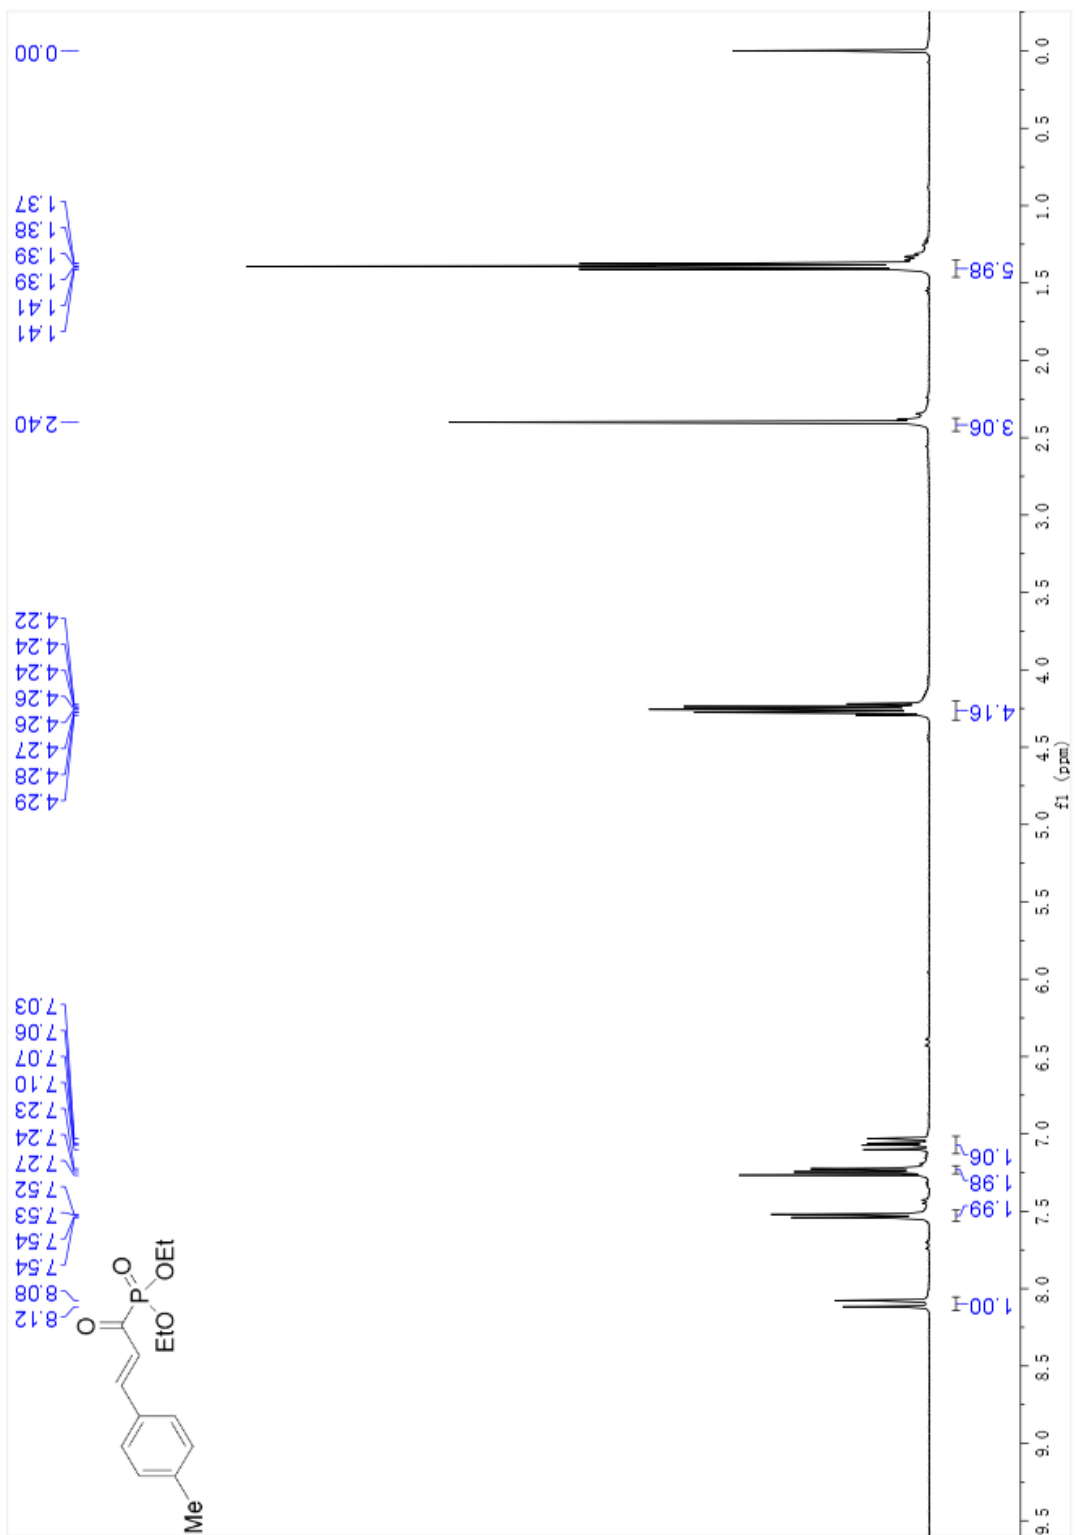

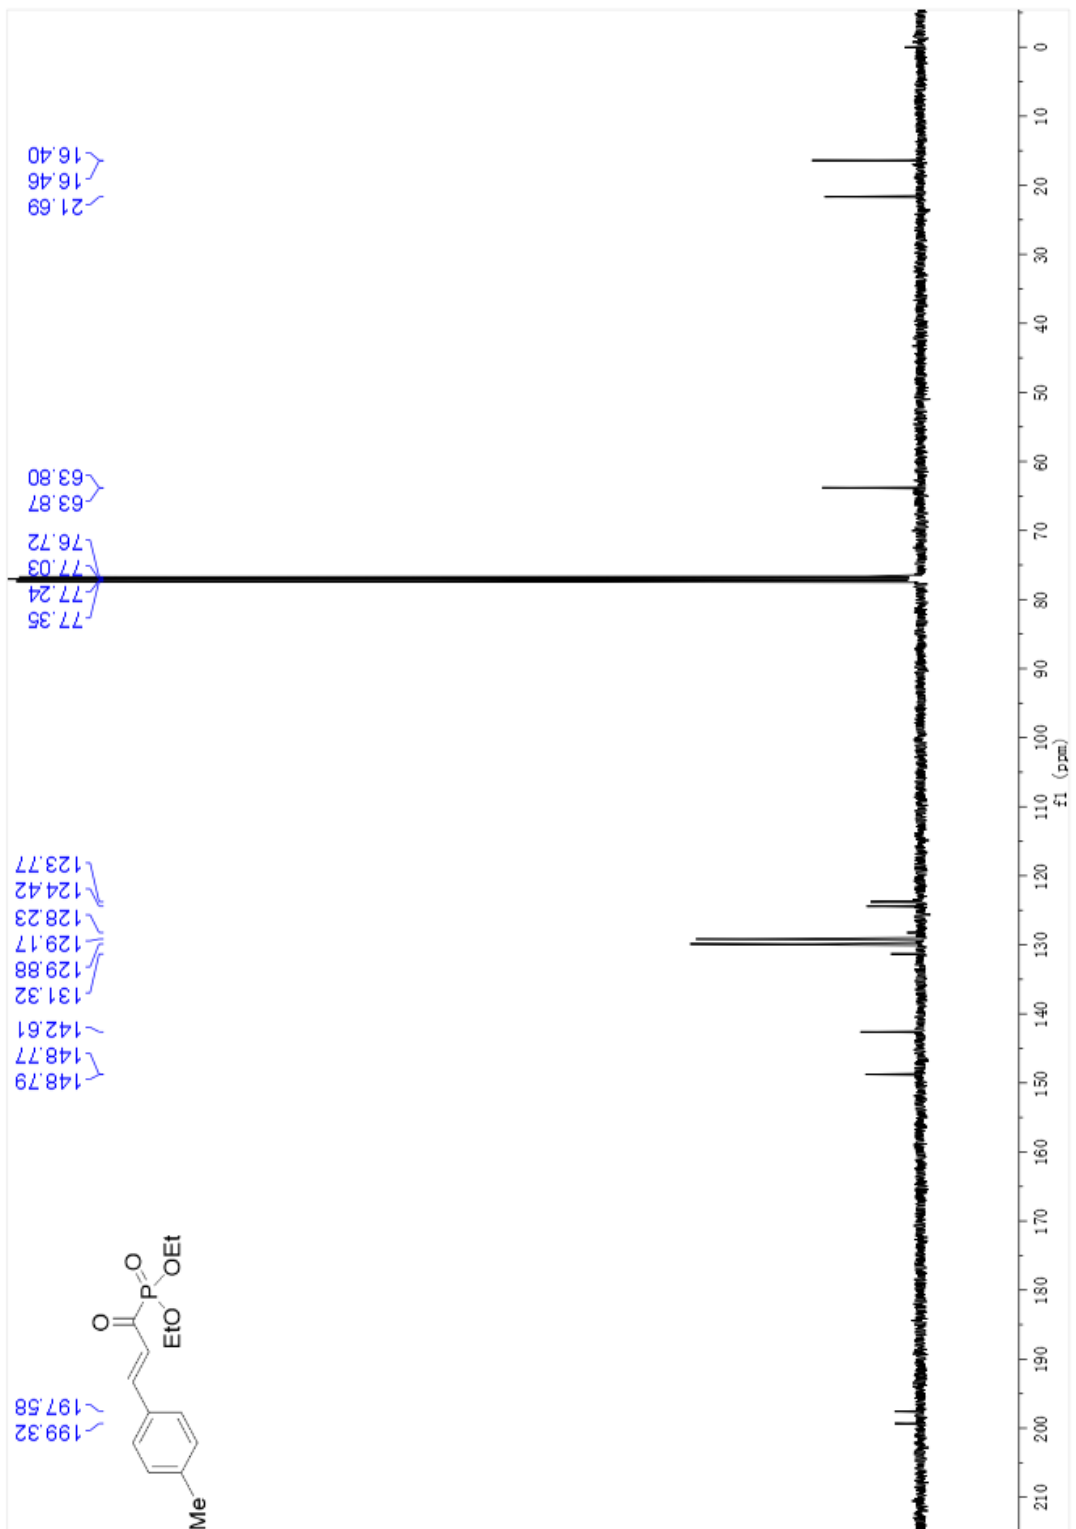

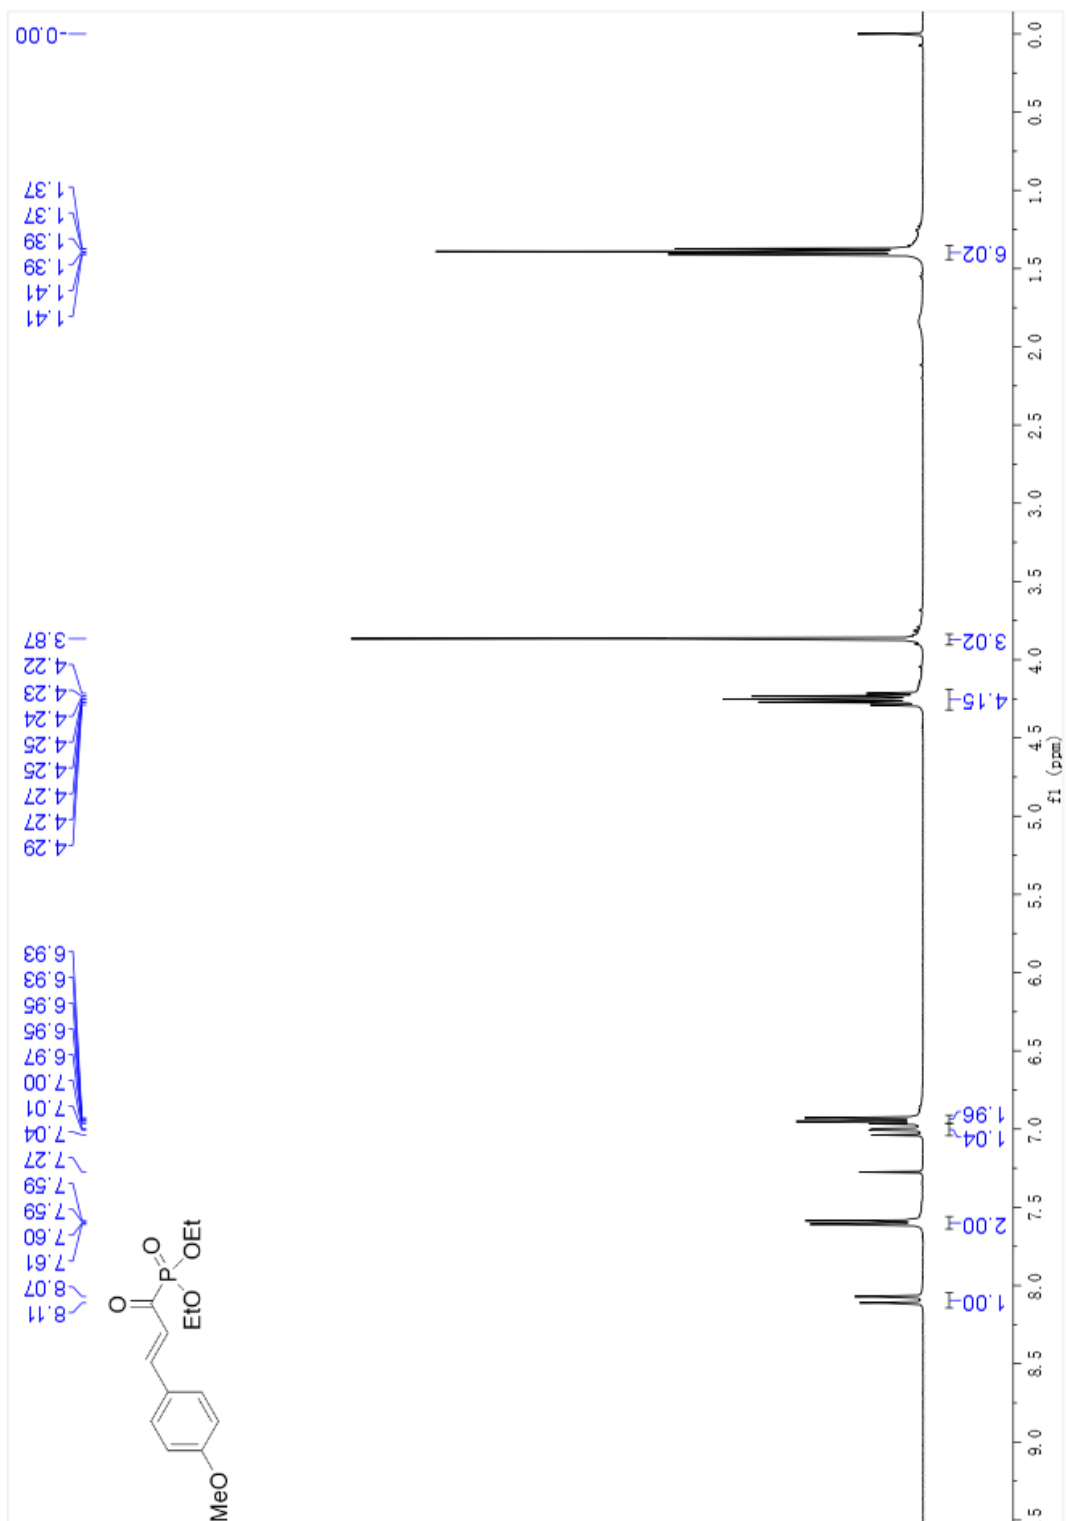

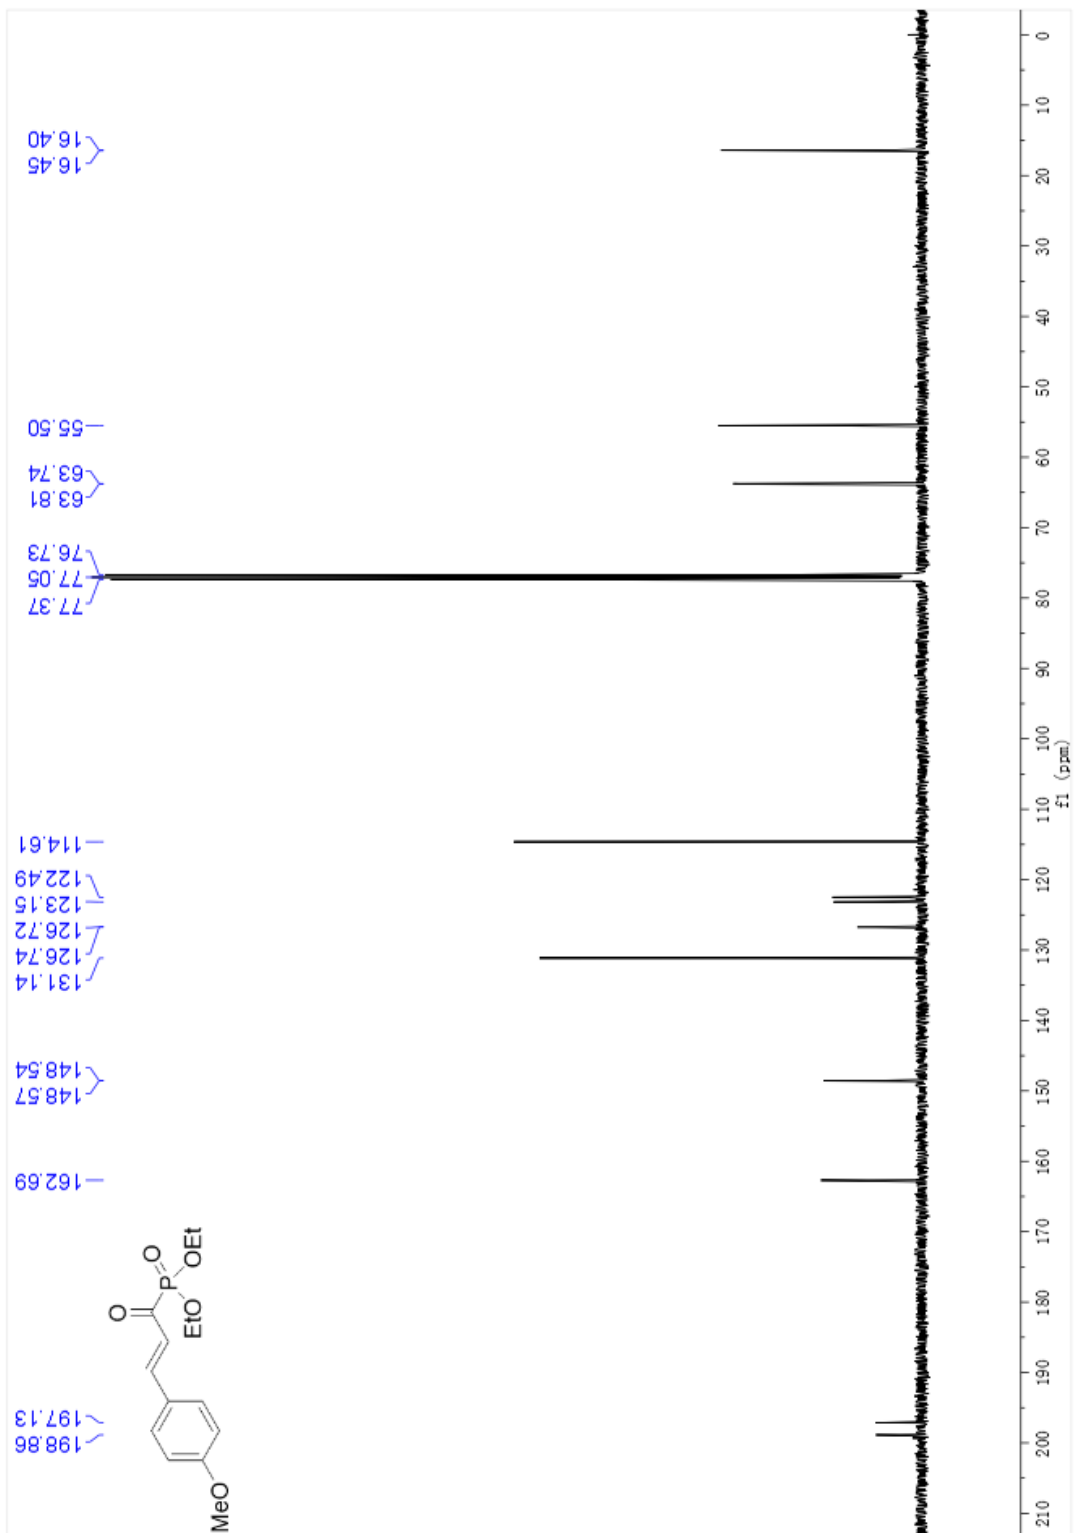



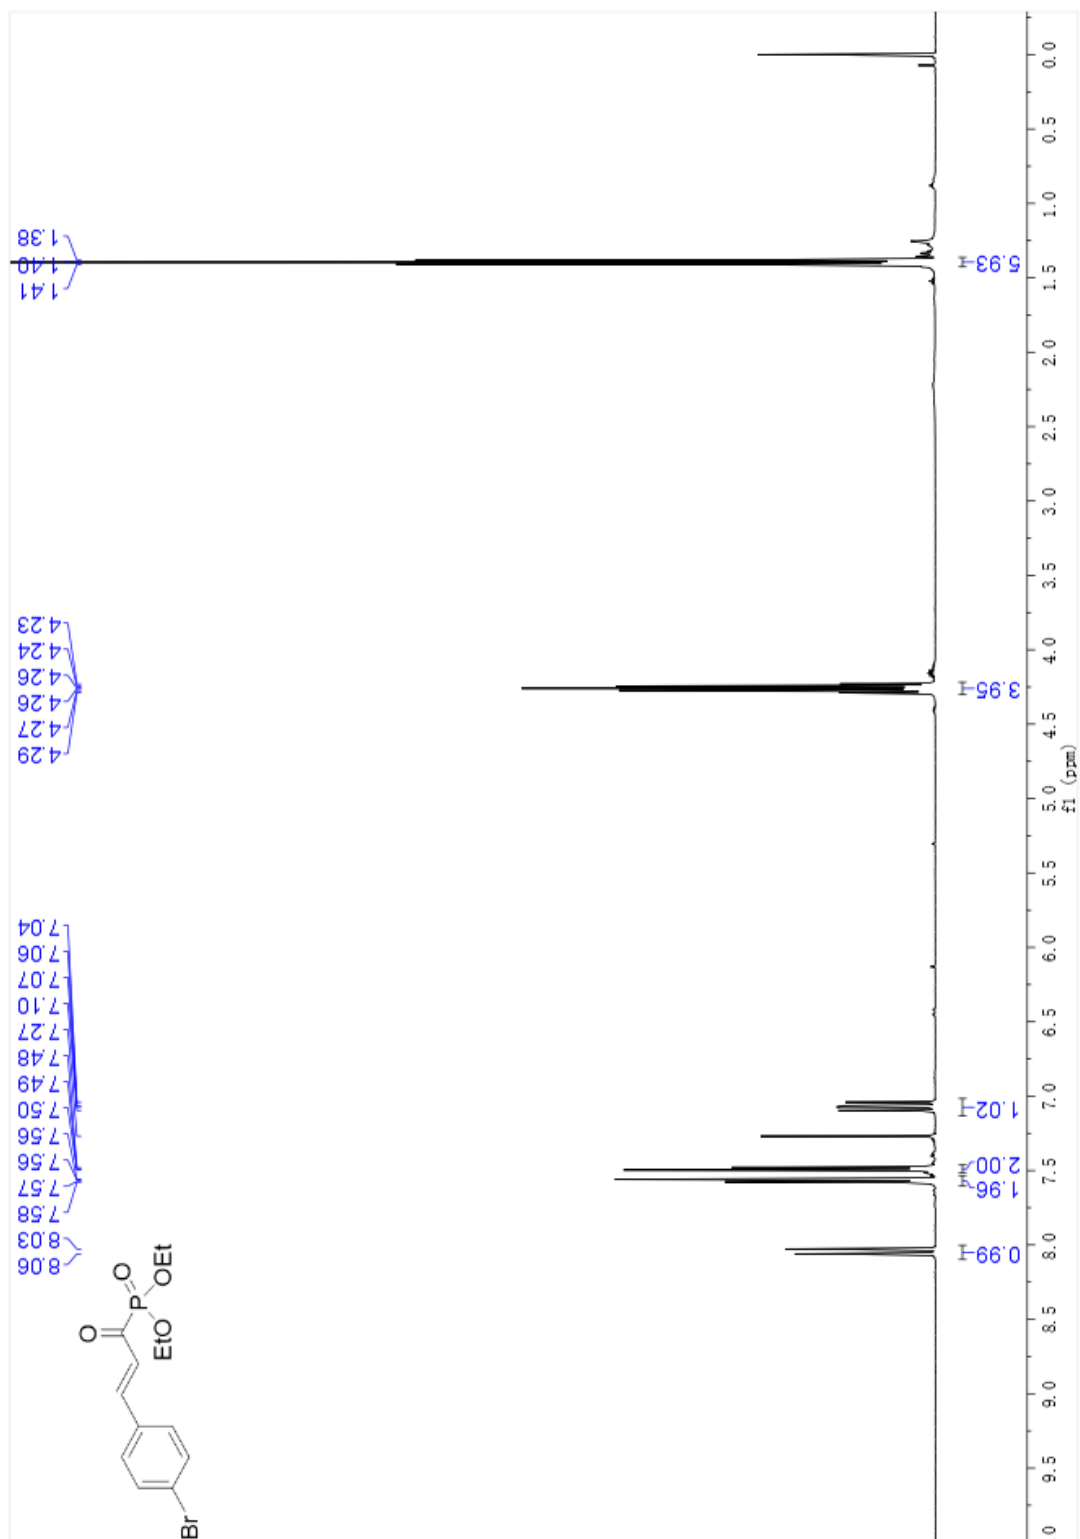

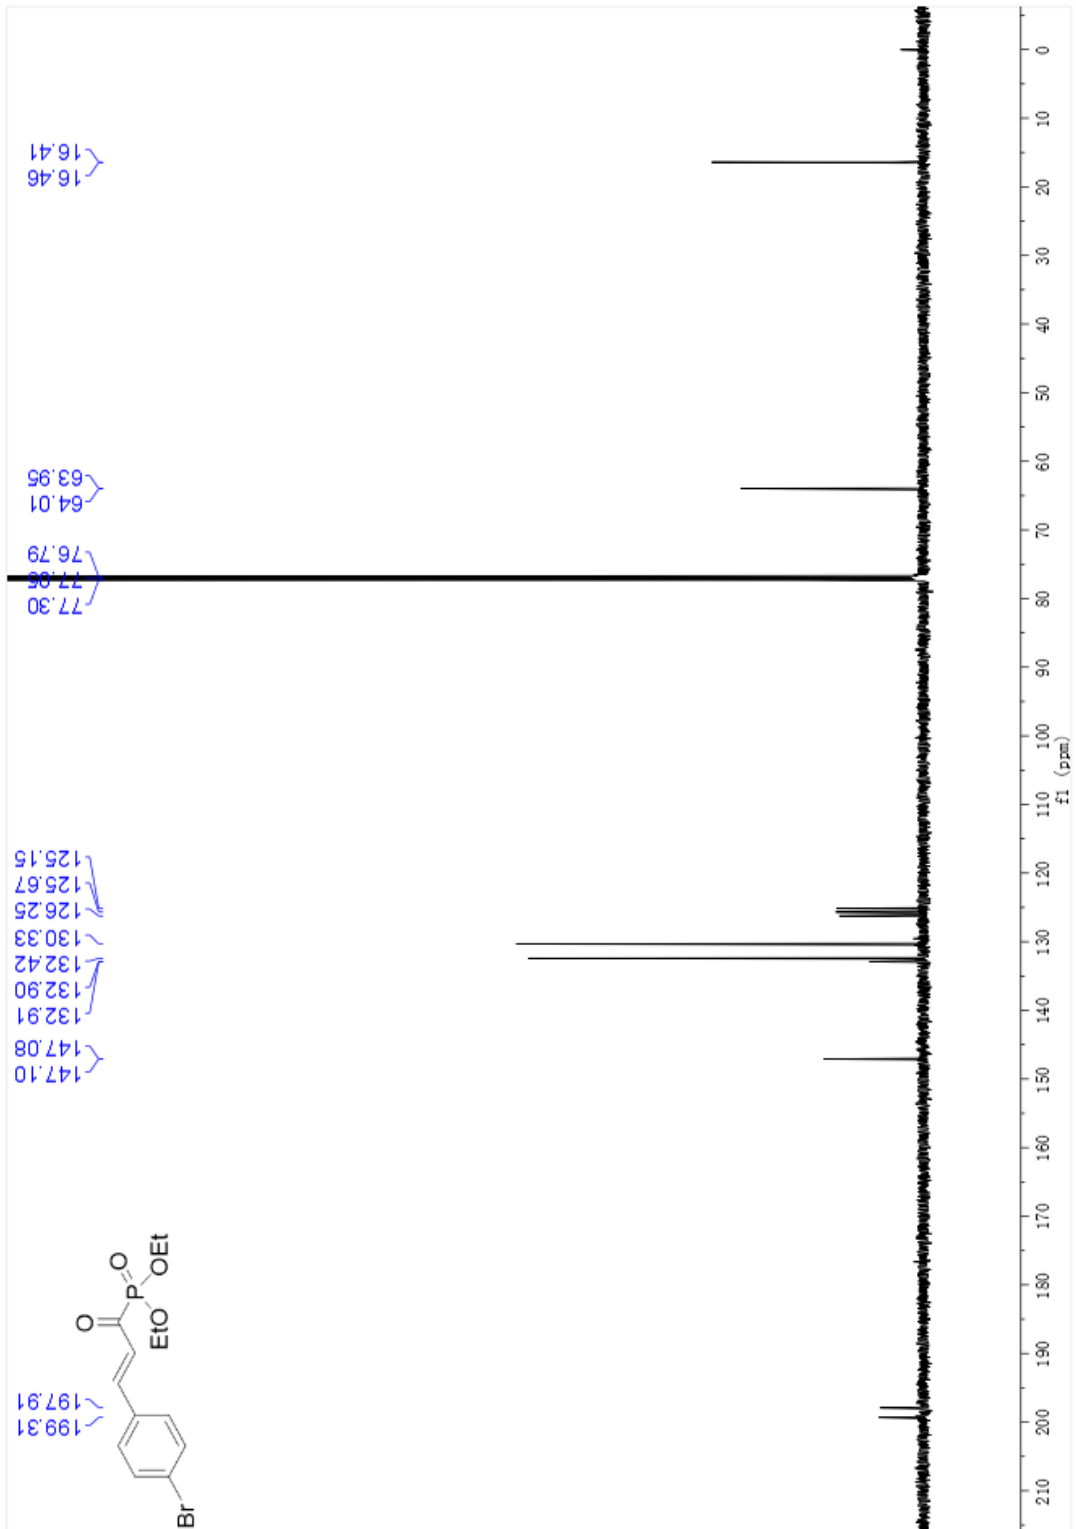

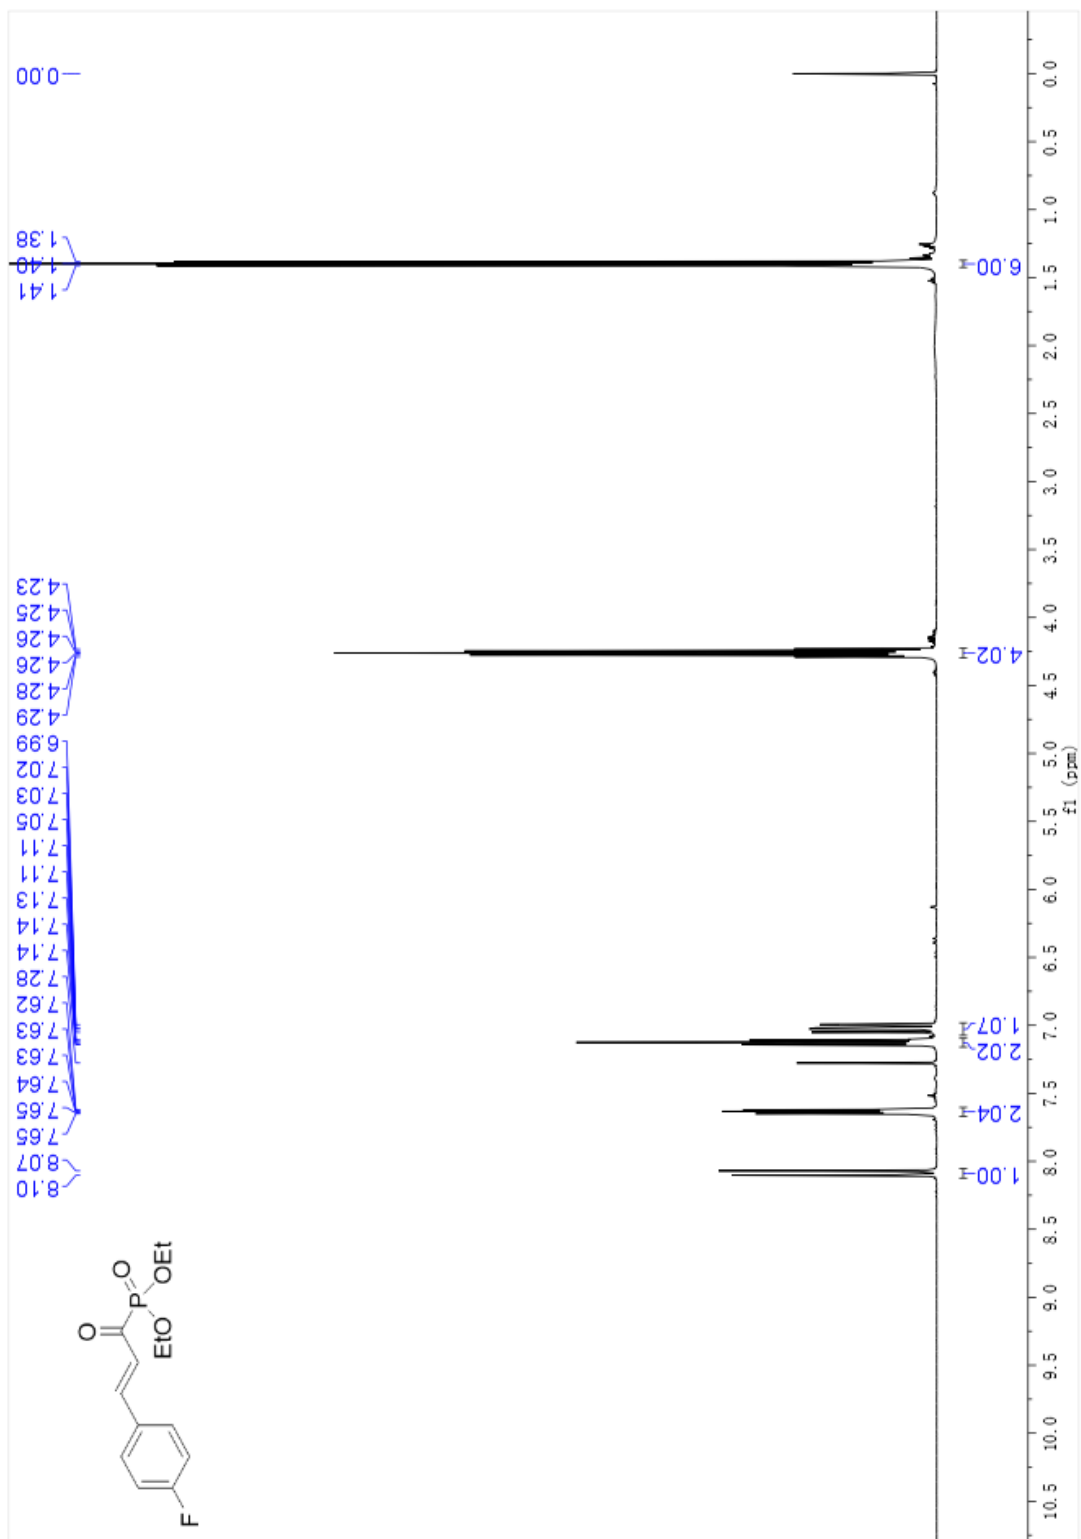

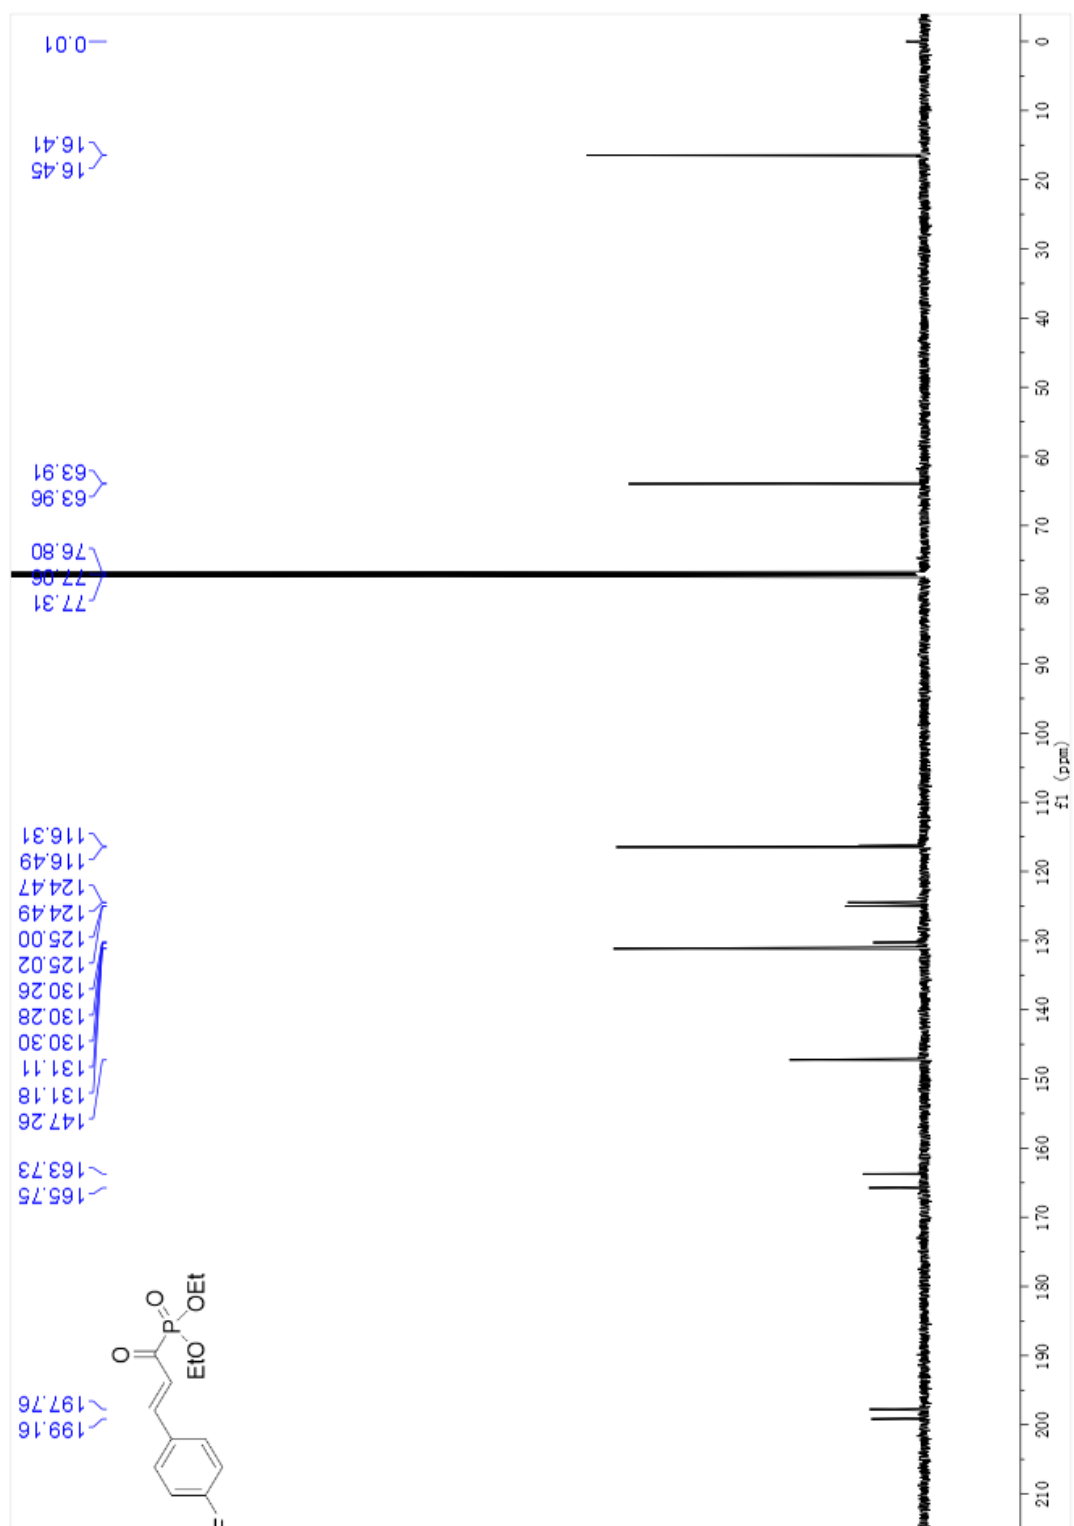

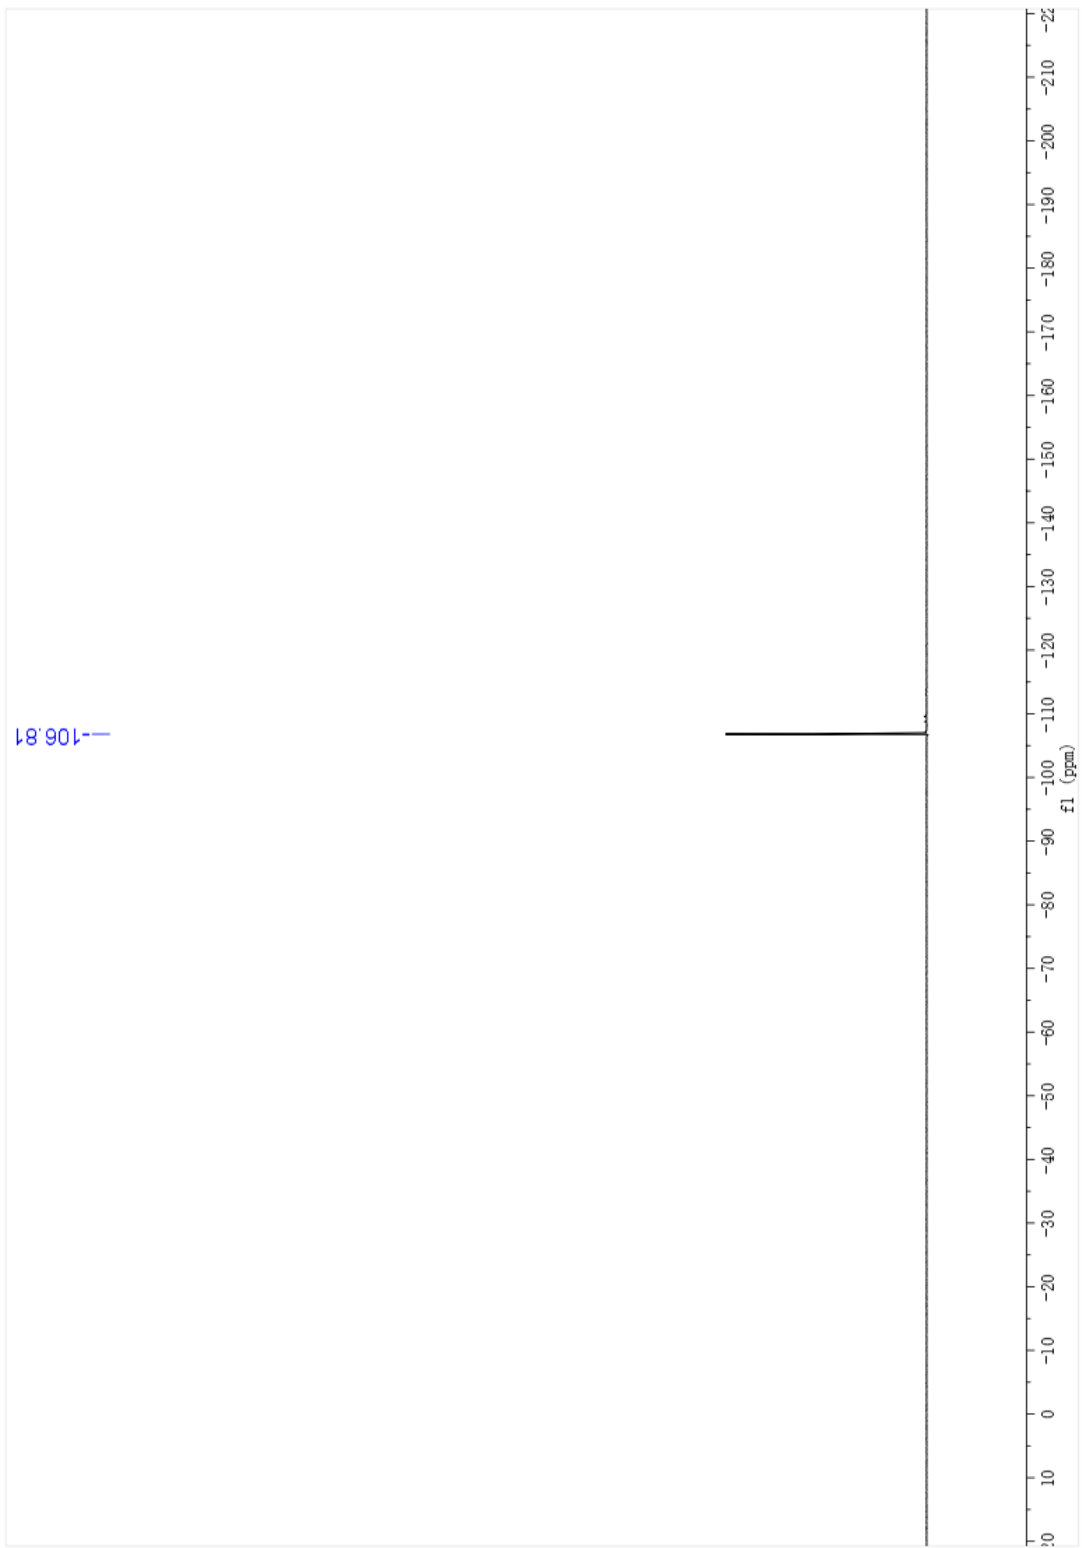

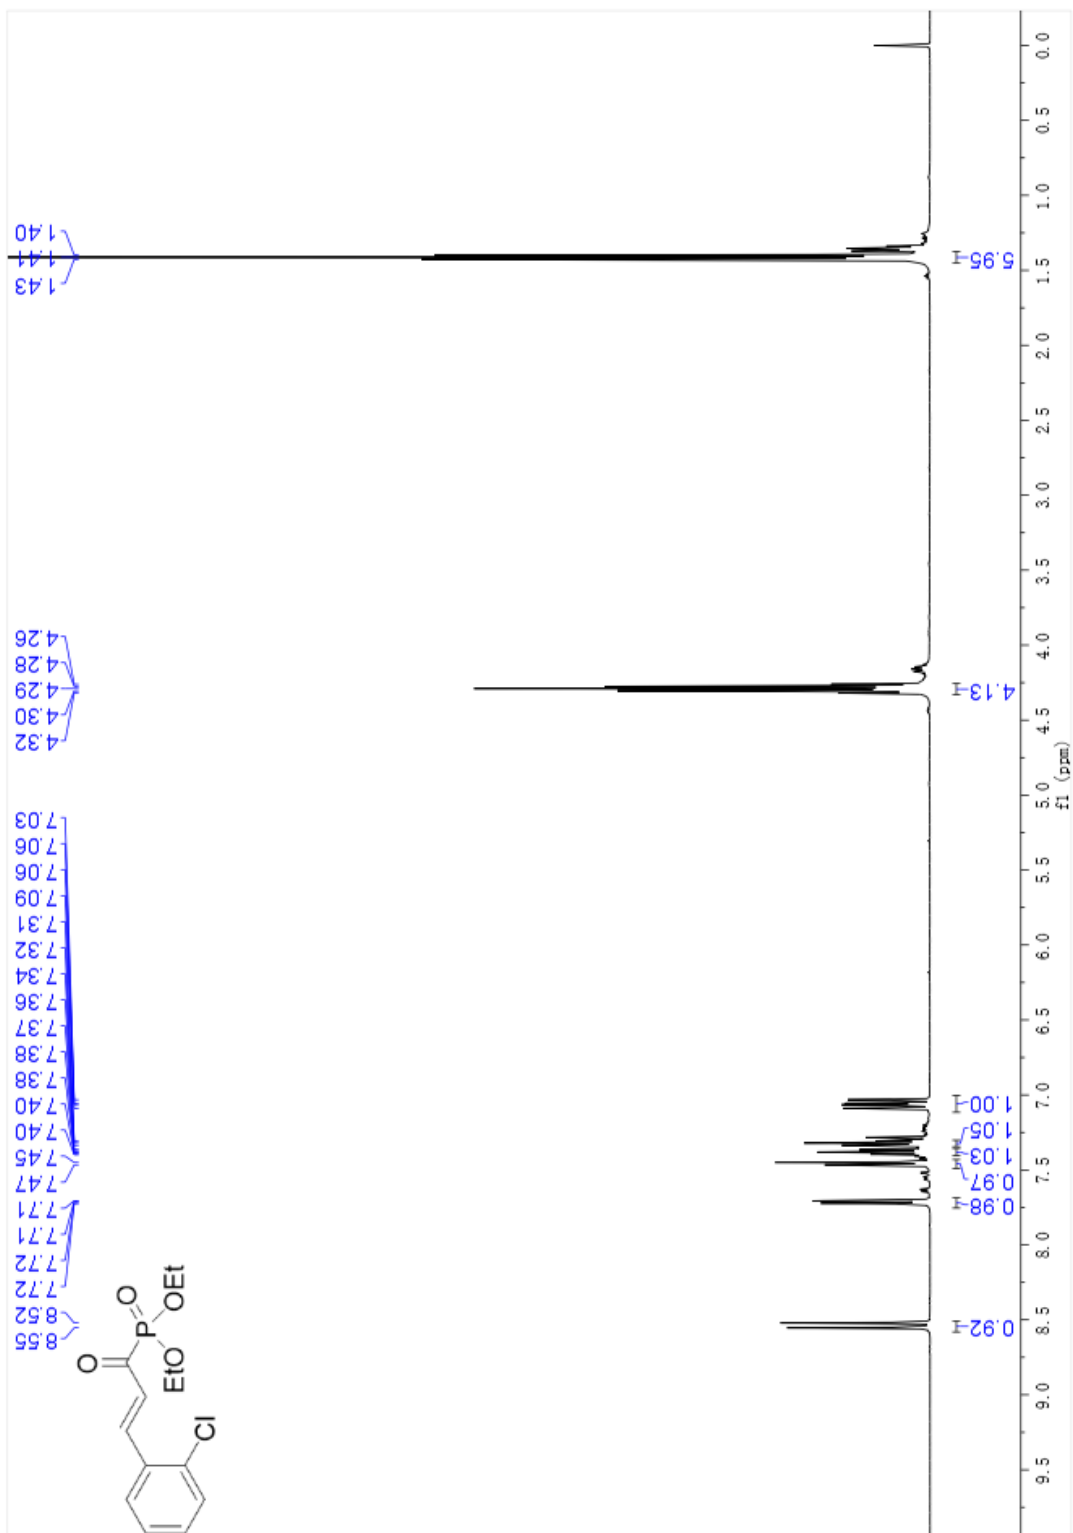

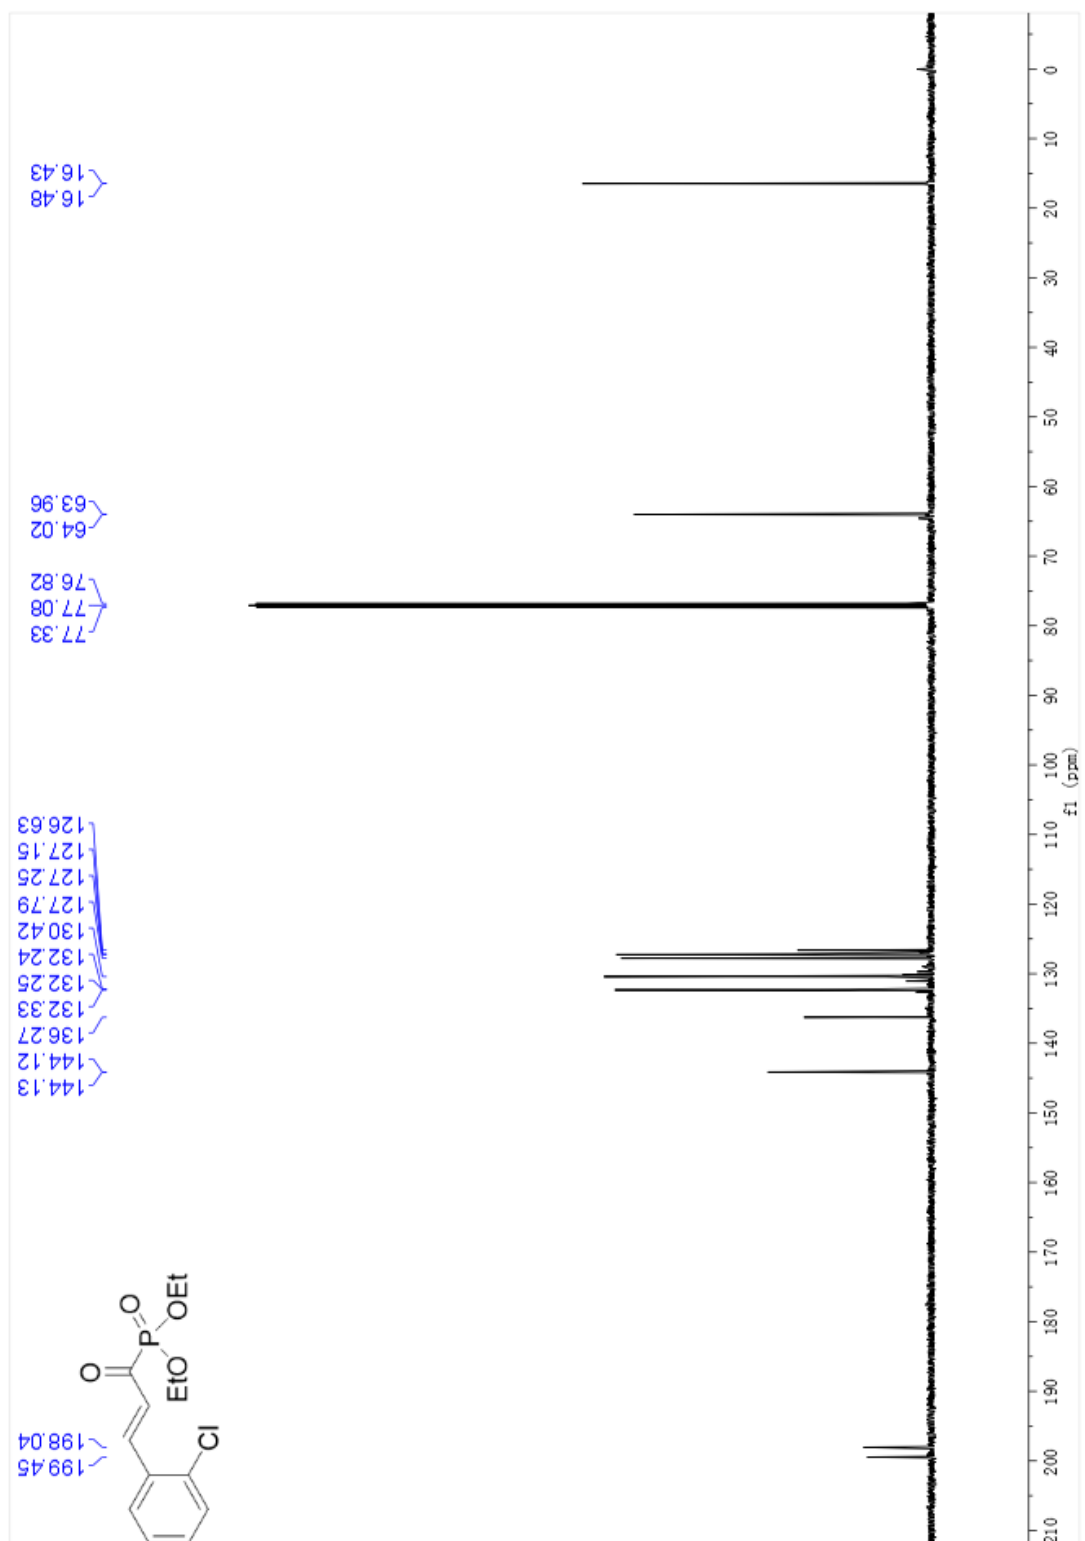

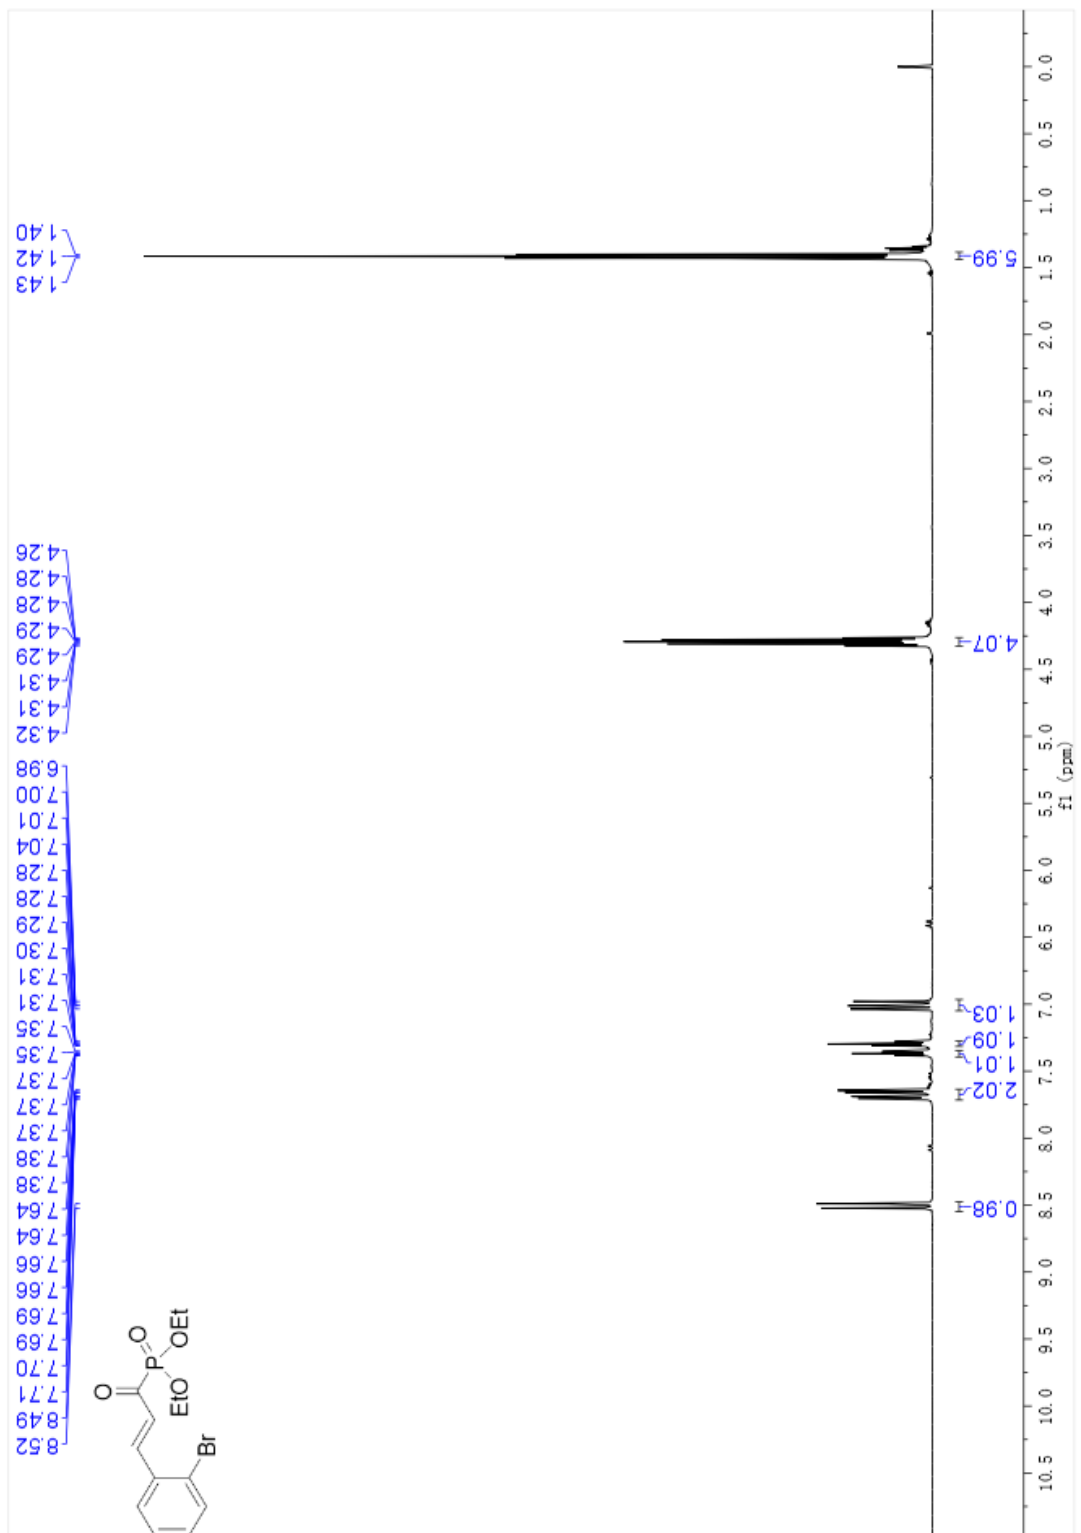



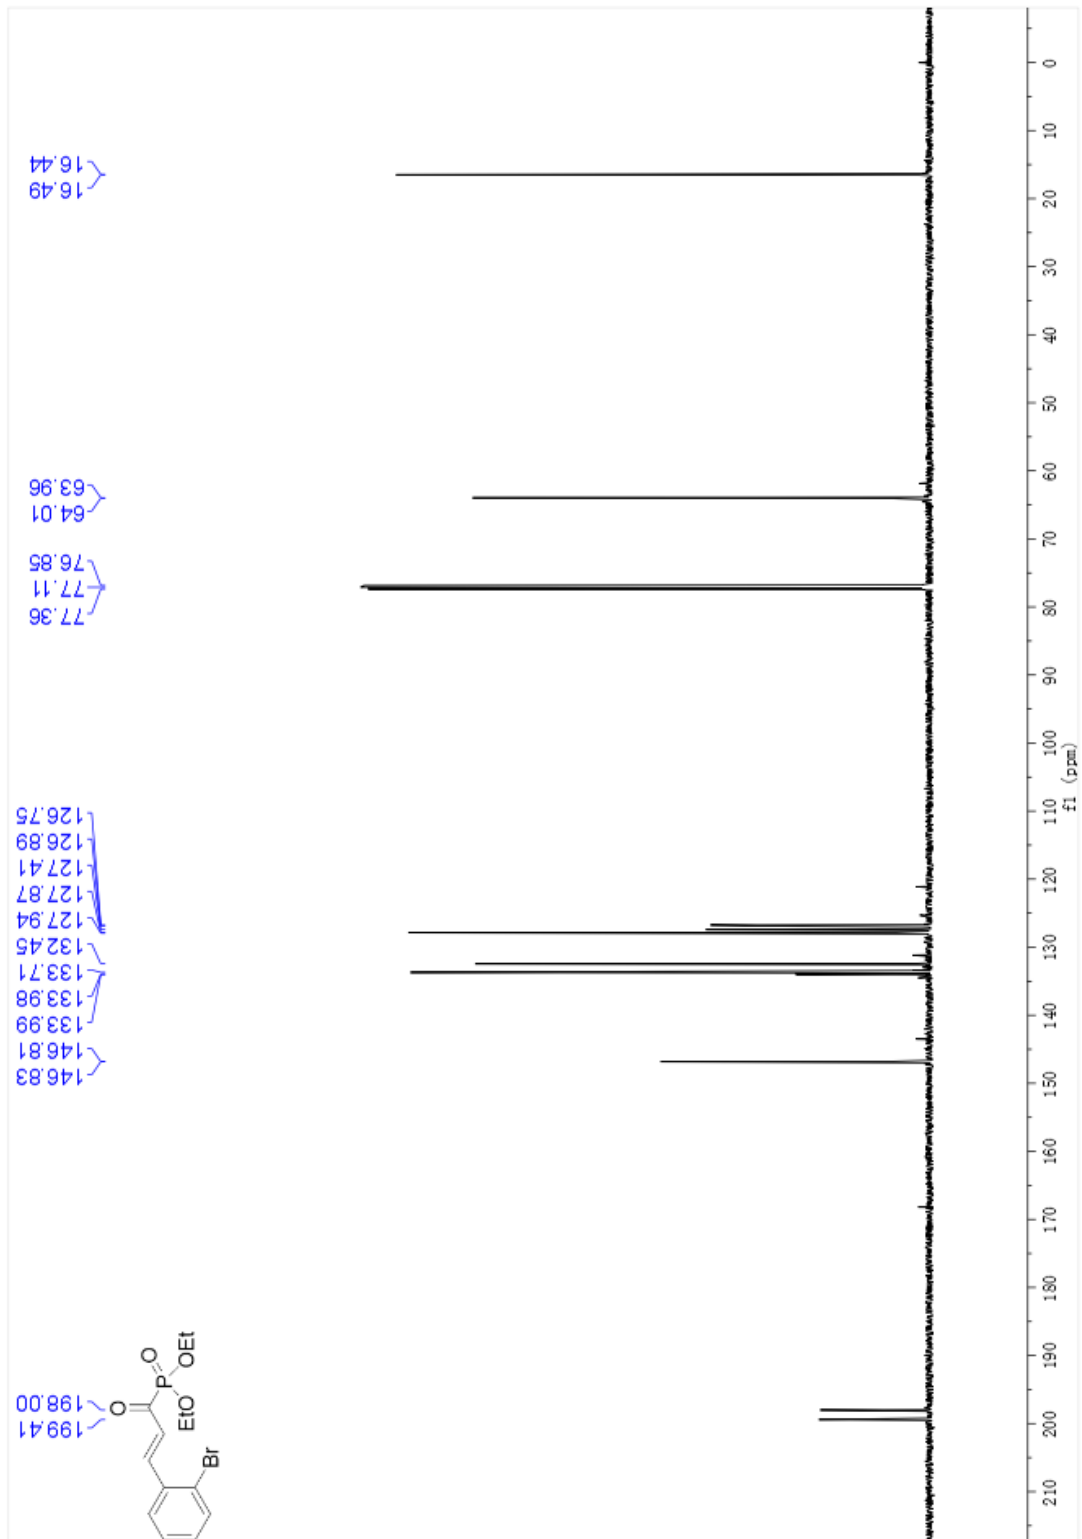

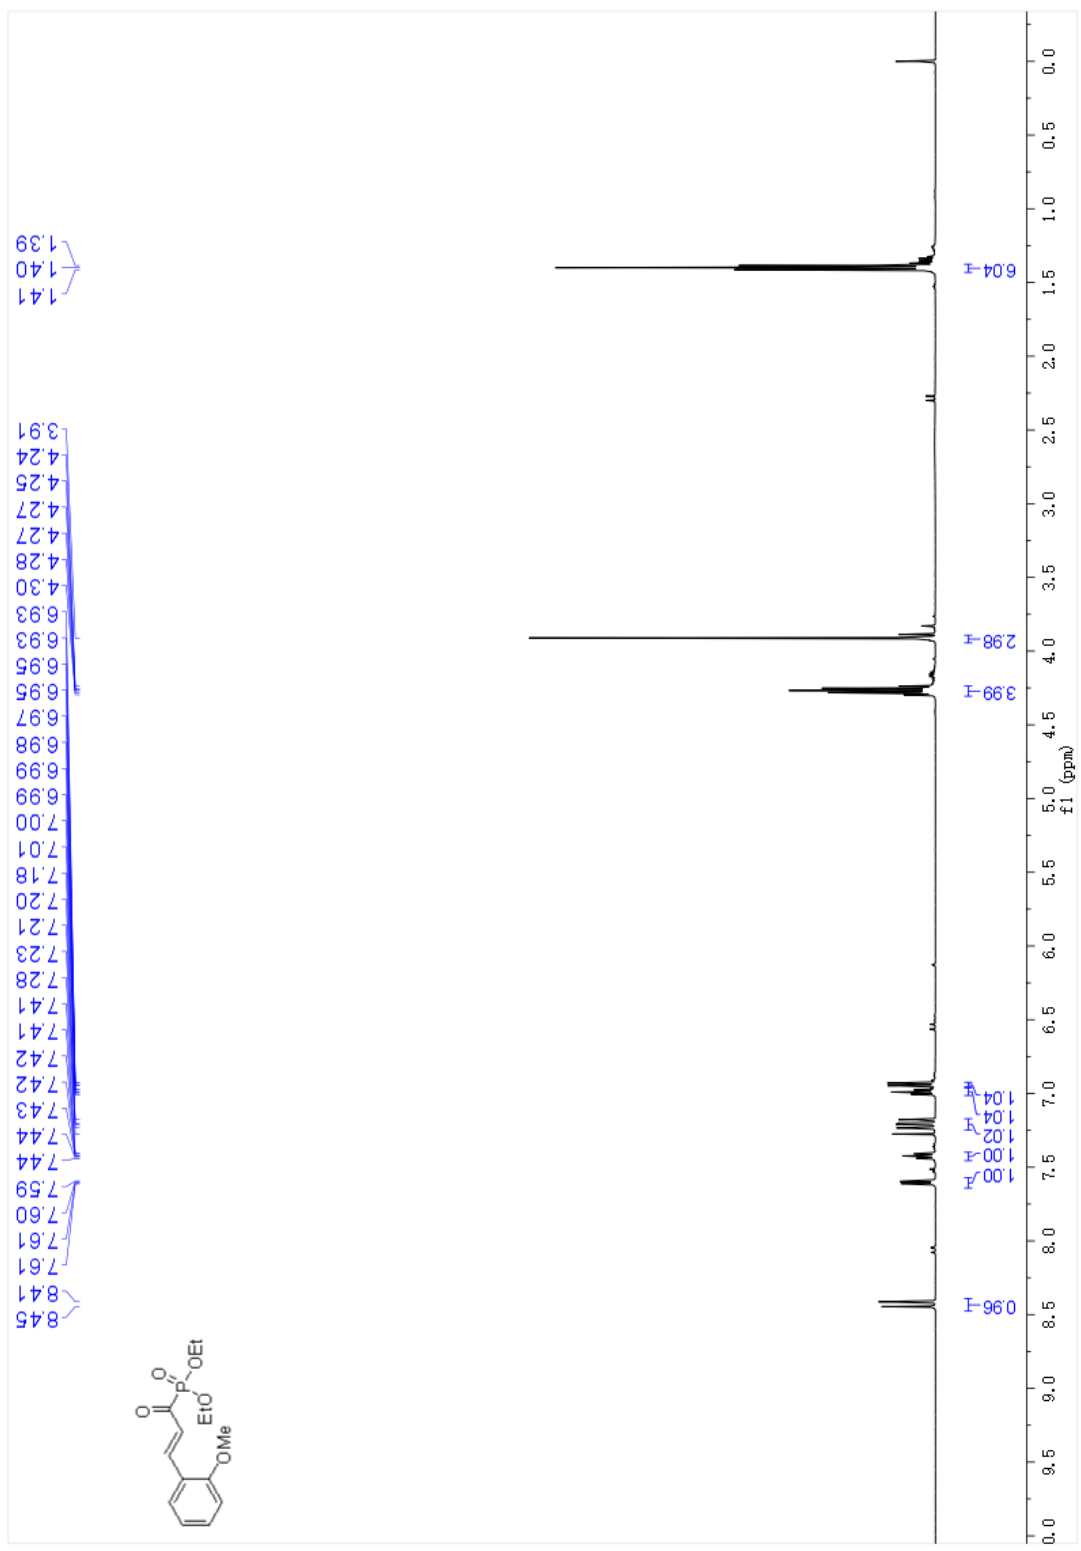

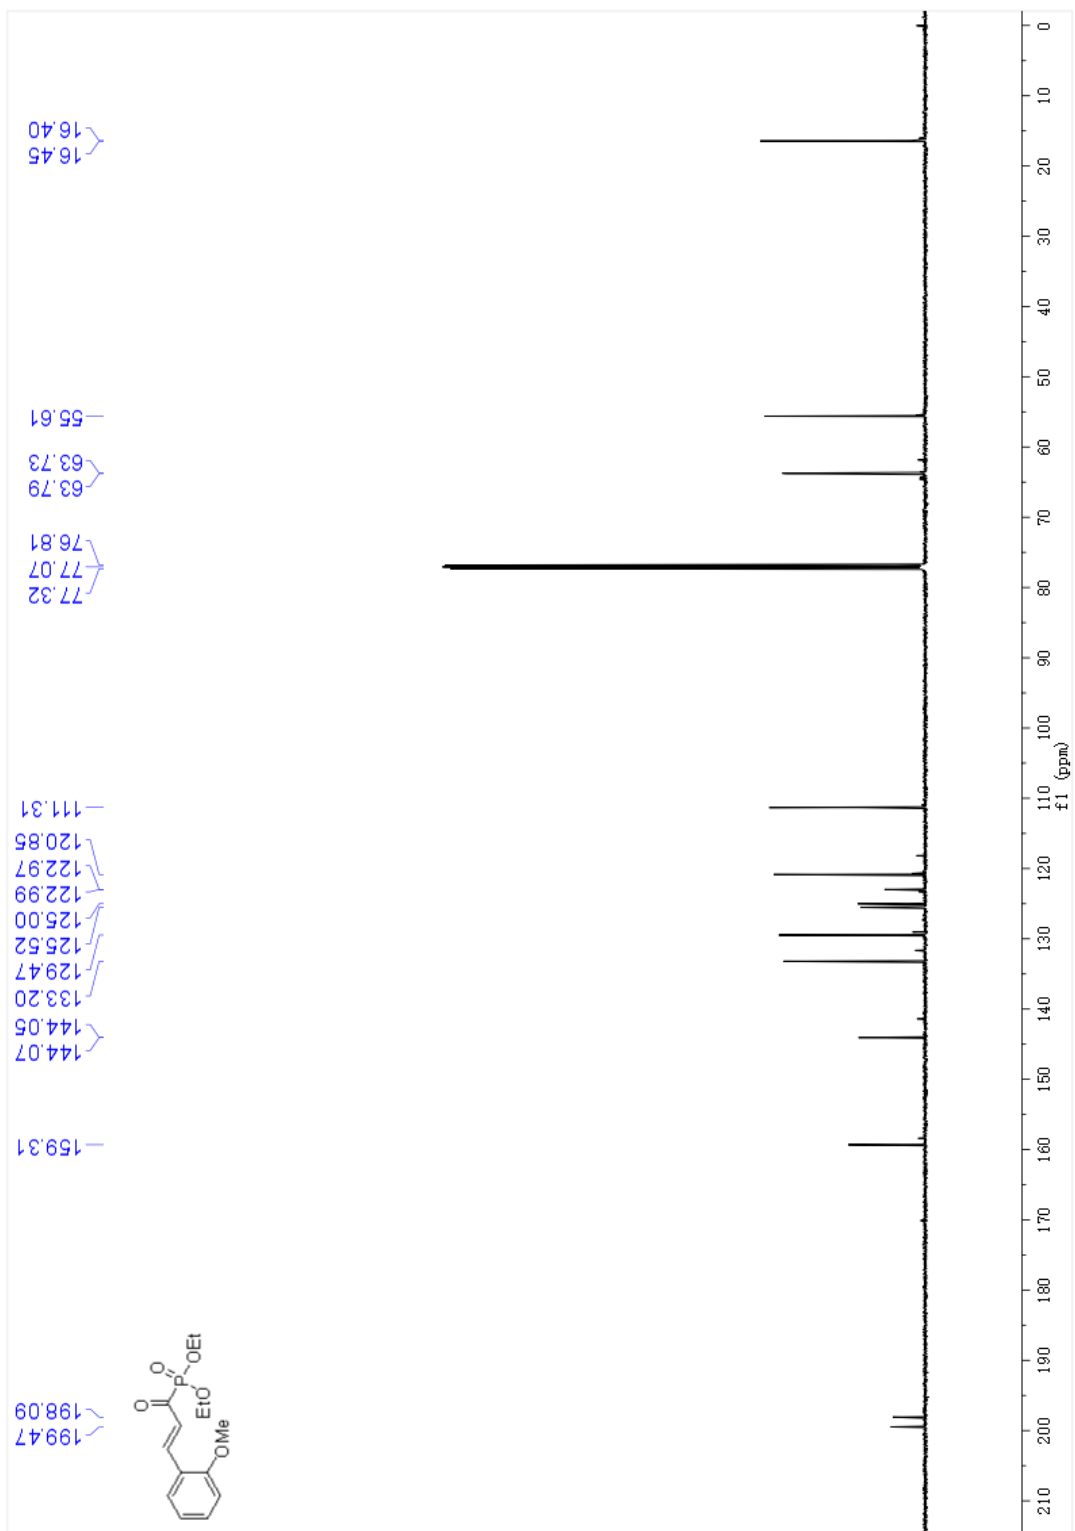

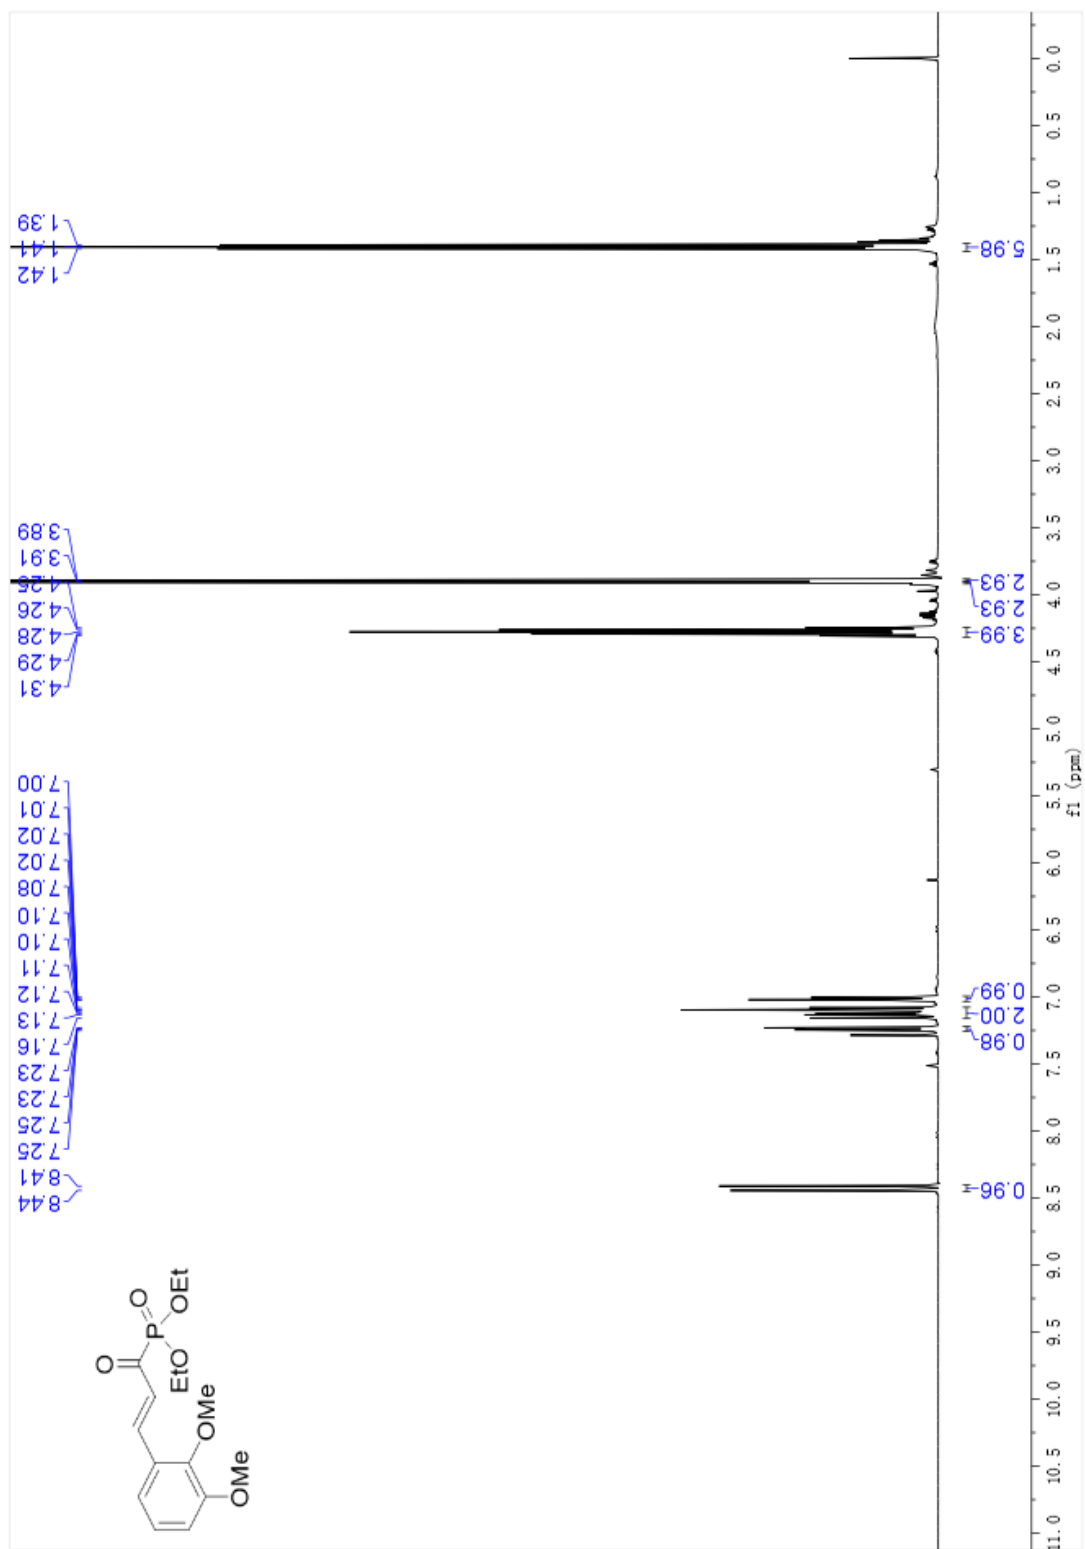

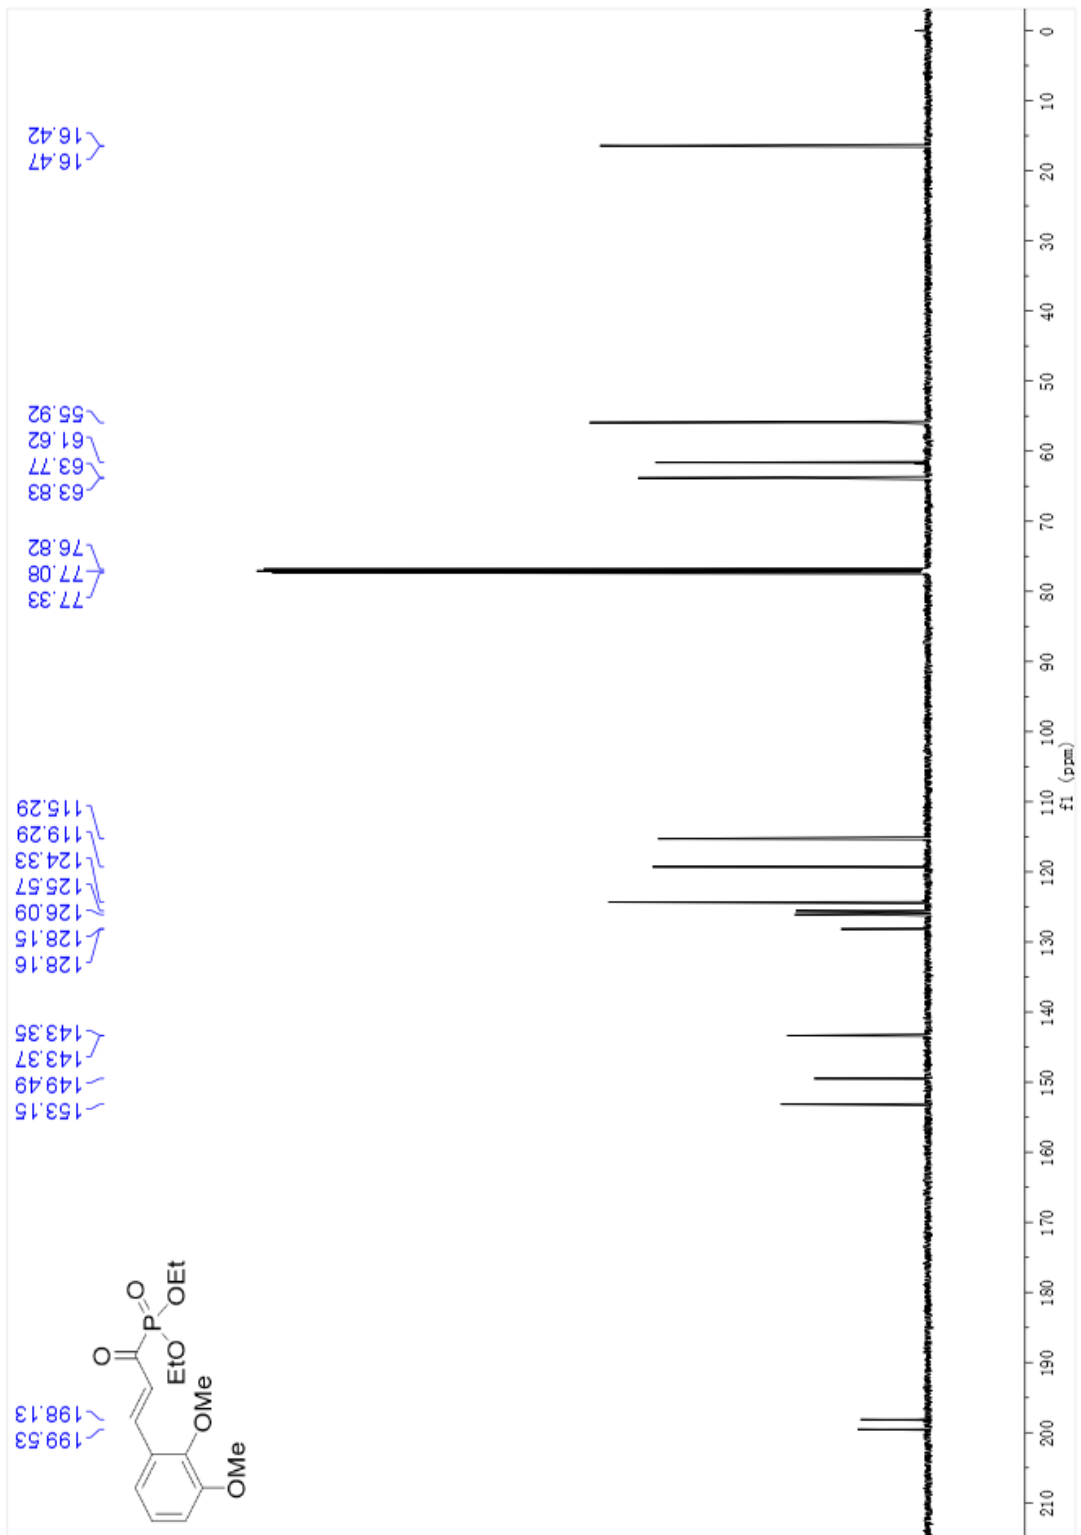

# NMR Spectra of Products 3a-3n

<sup>1</sup>H NMR spectrum of product 3a

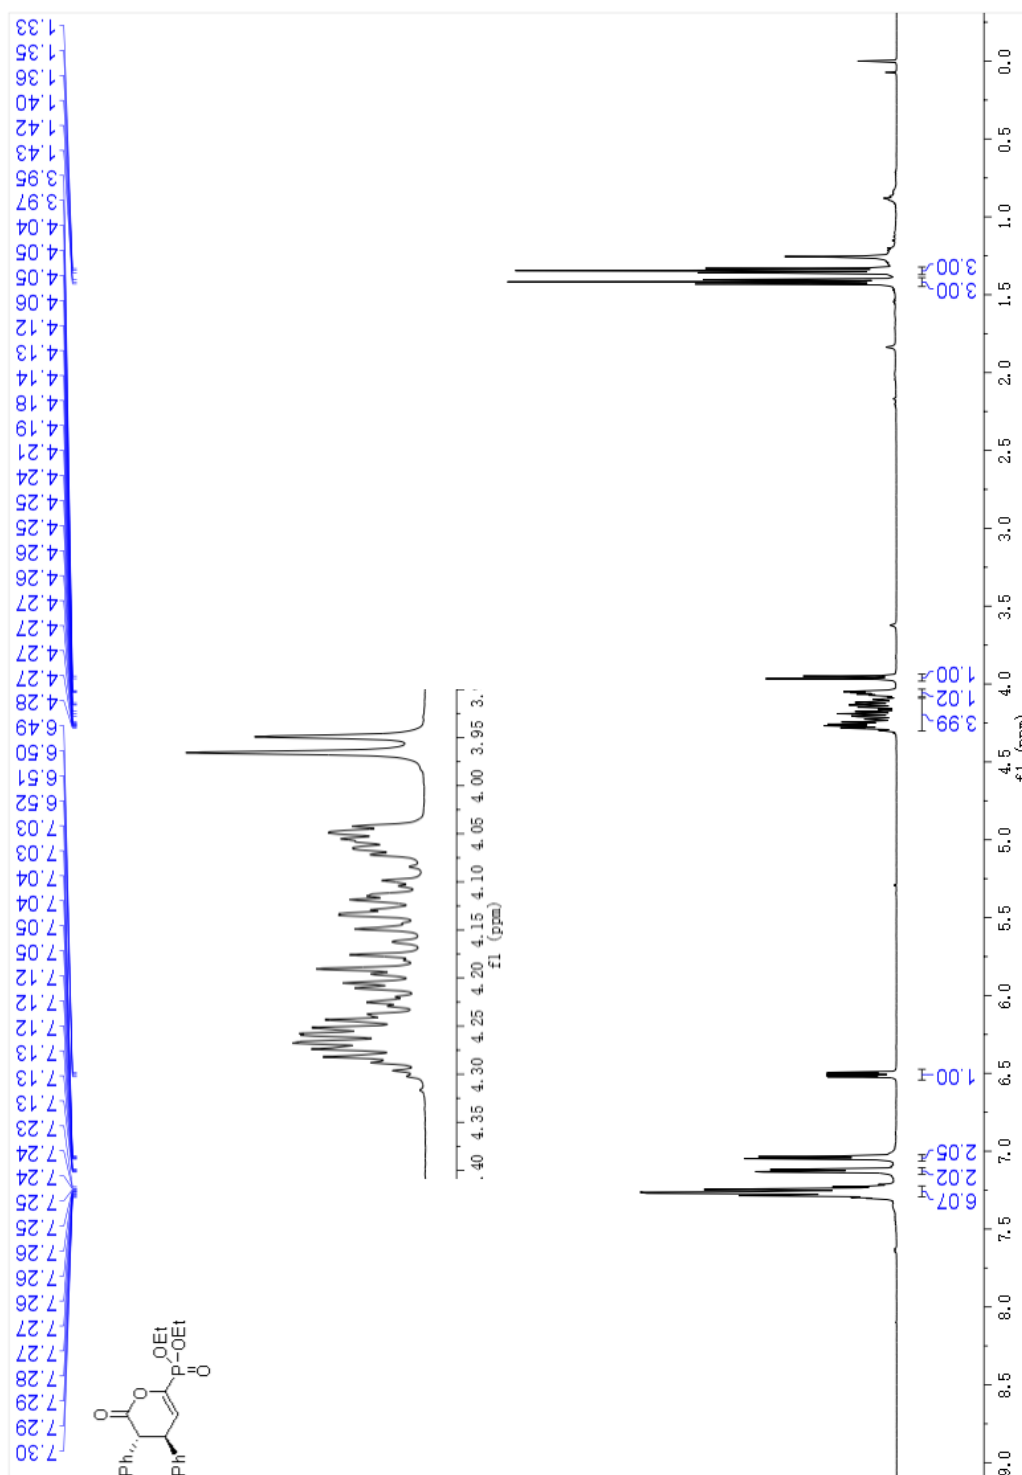

<sup>13</sup>C NMR spectrum of product **3a**

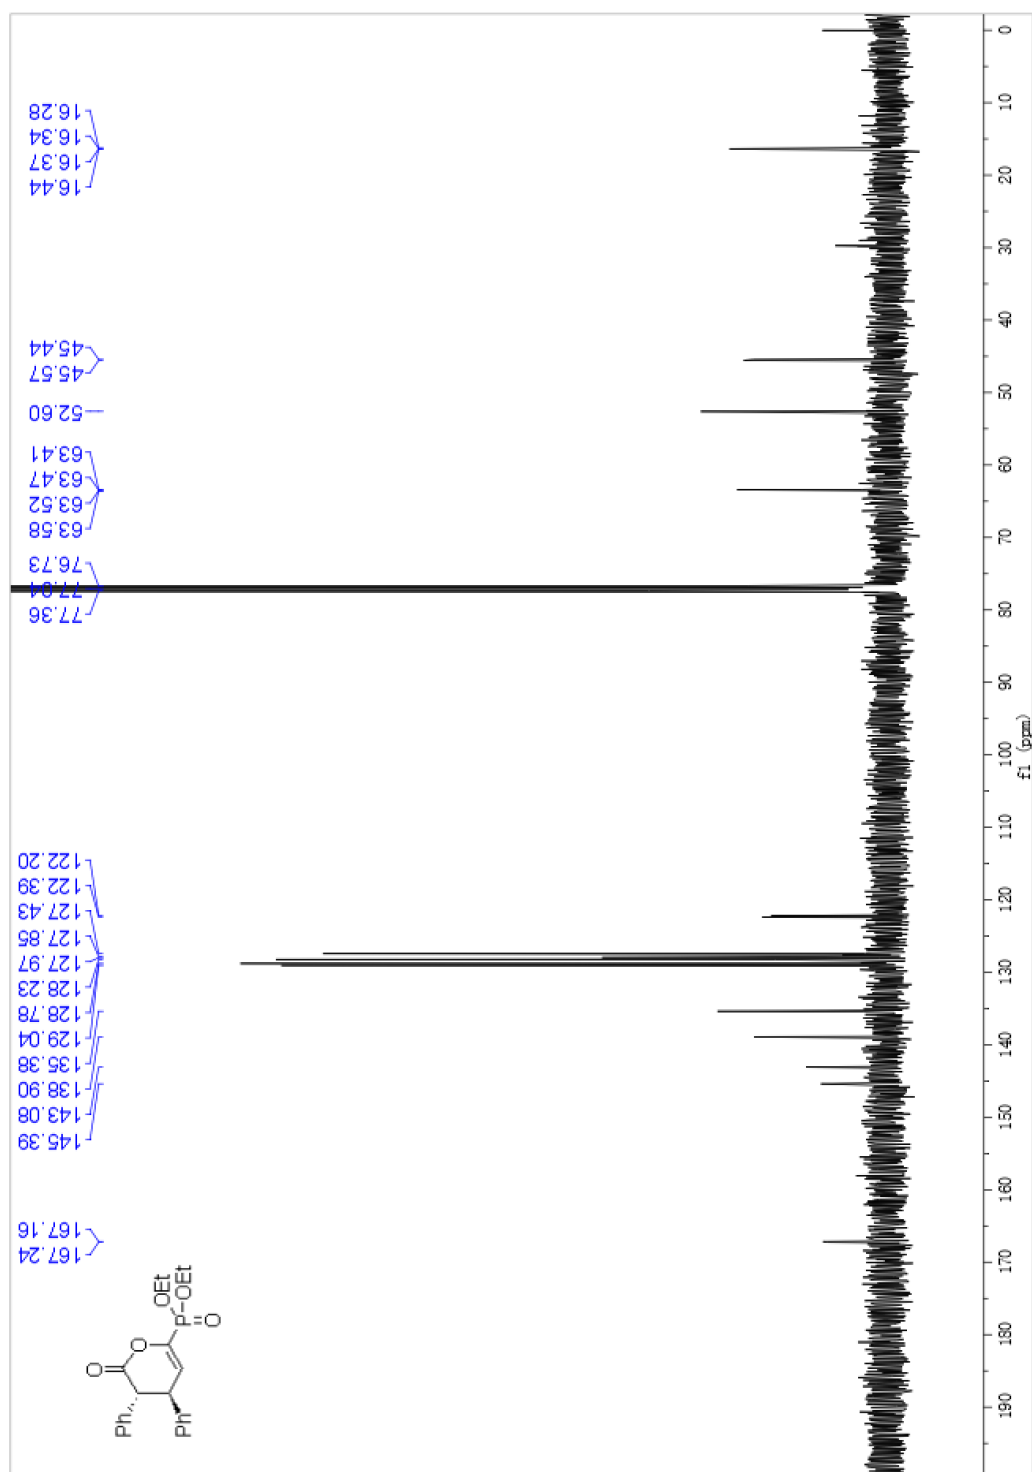

<sup>31</sup>P NMR spectrum of product **3a**

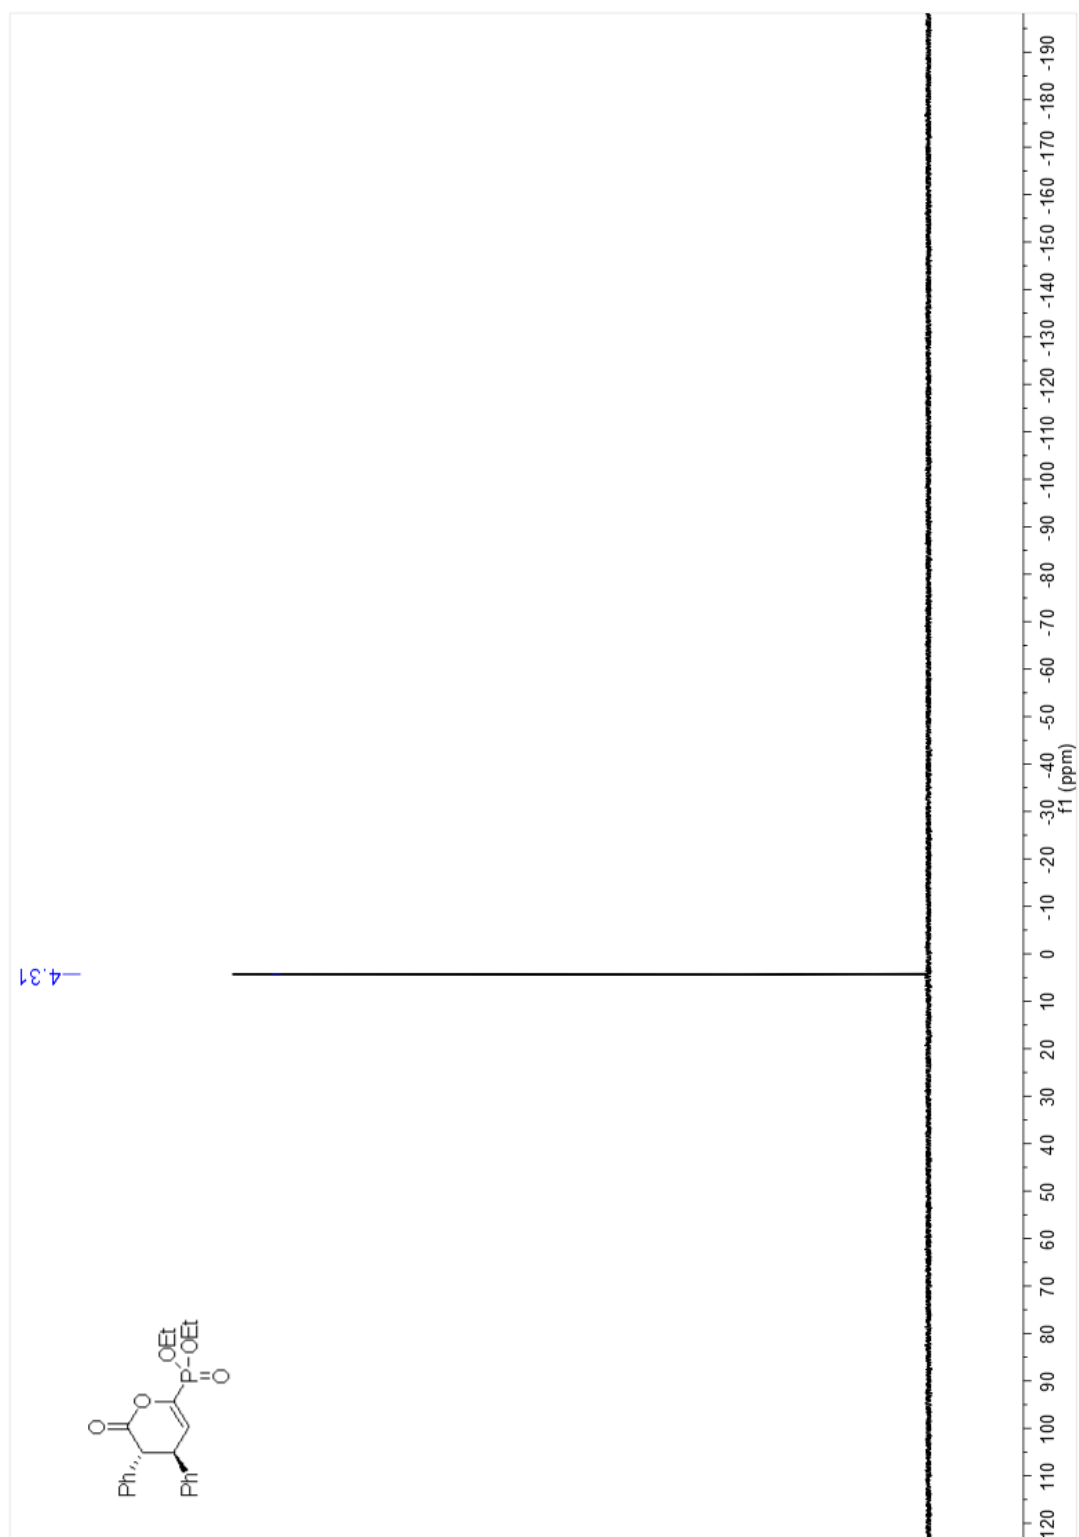



<sup>1</sup>H NMR spectrum of product **3b**

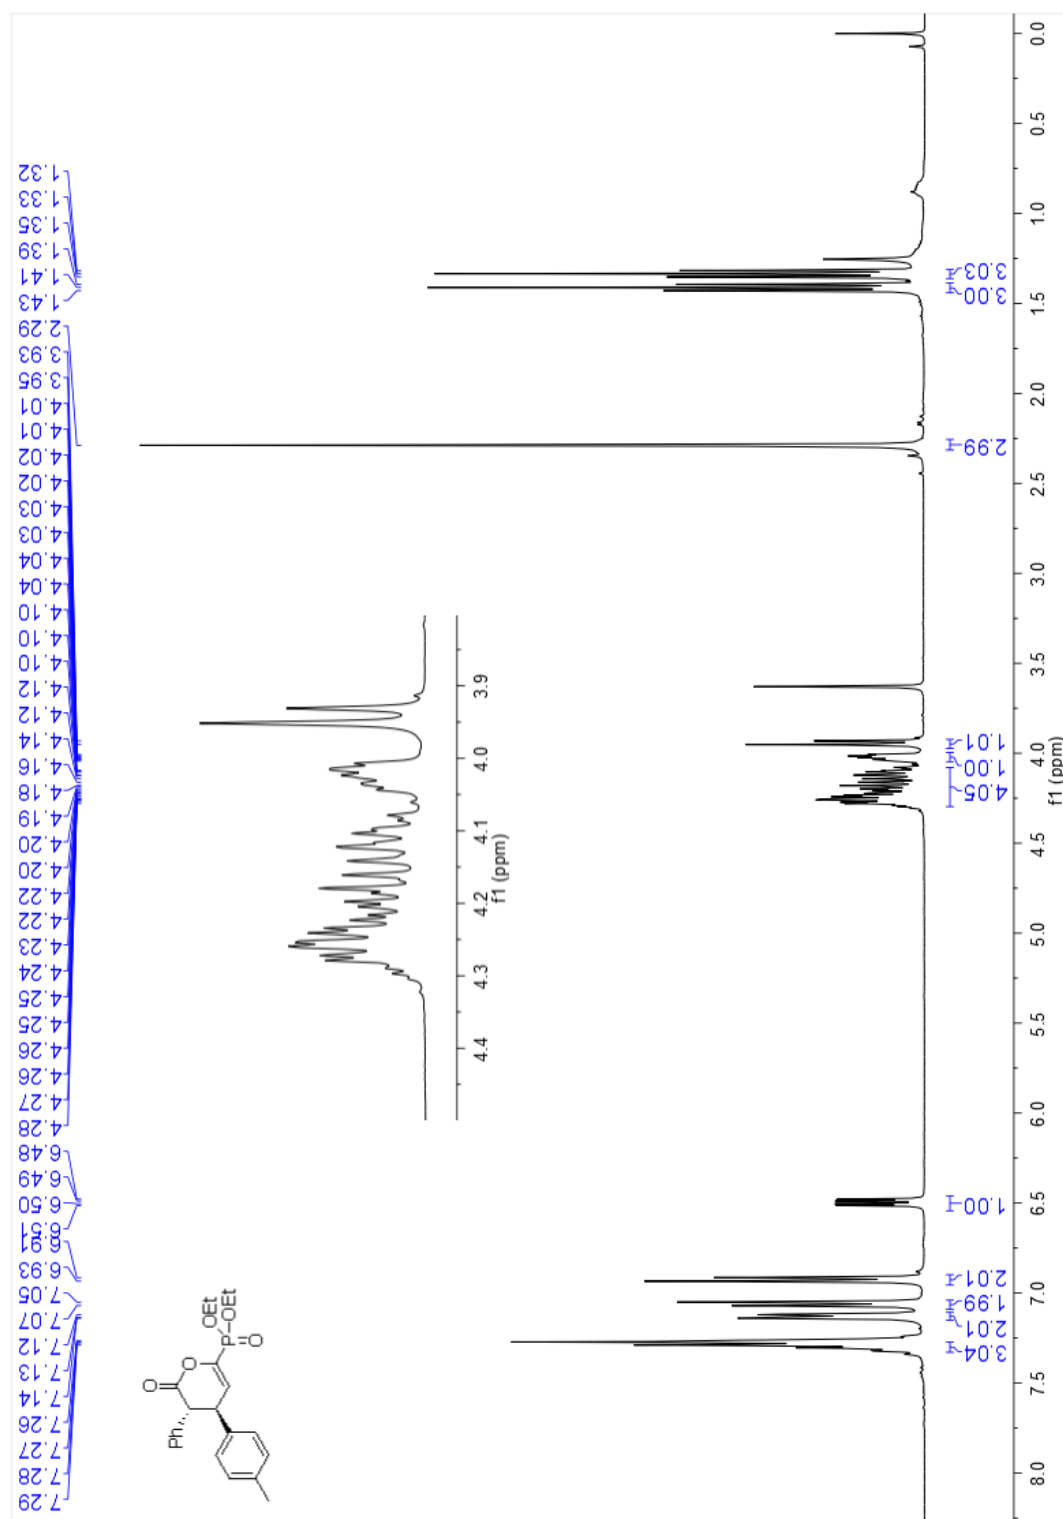

<sup>13</sup>C NMR spectrum of product **3b**

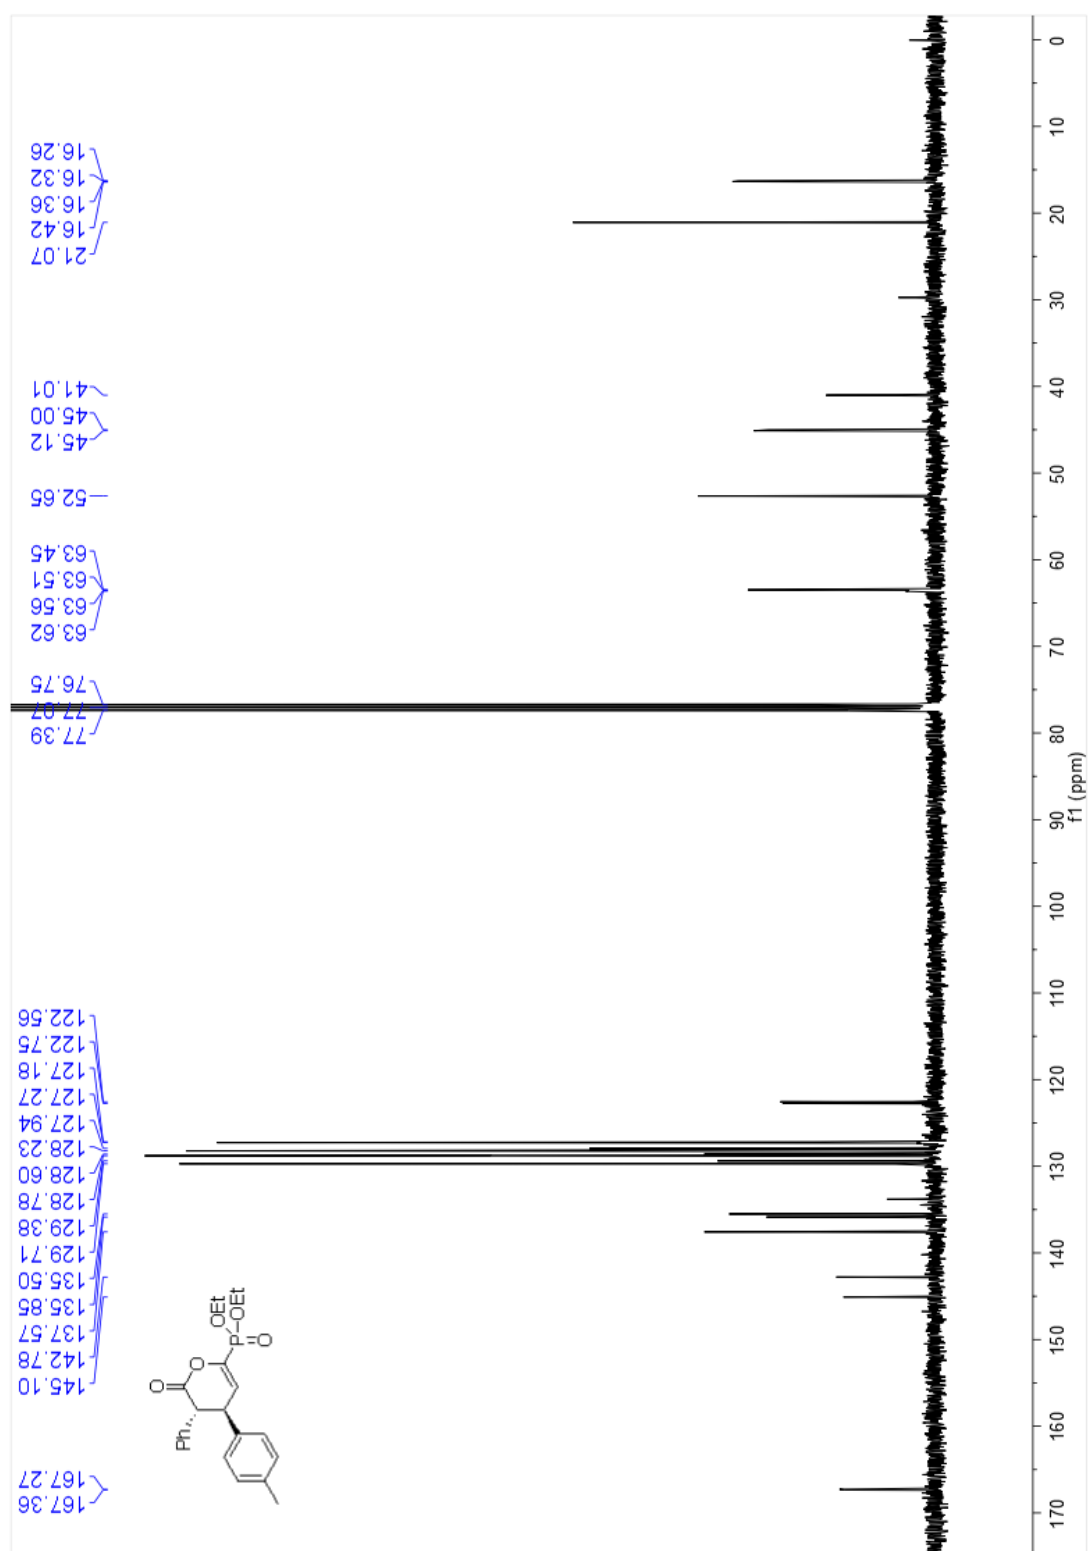

<sup>31</sup>P NMR spectrum of product **3b**

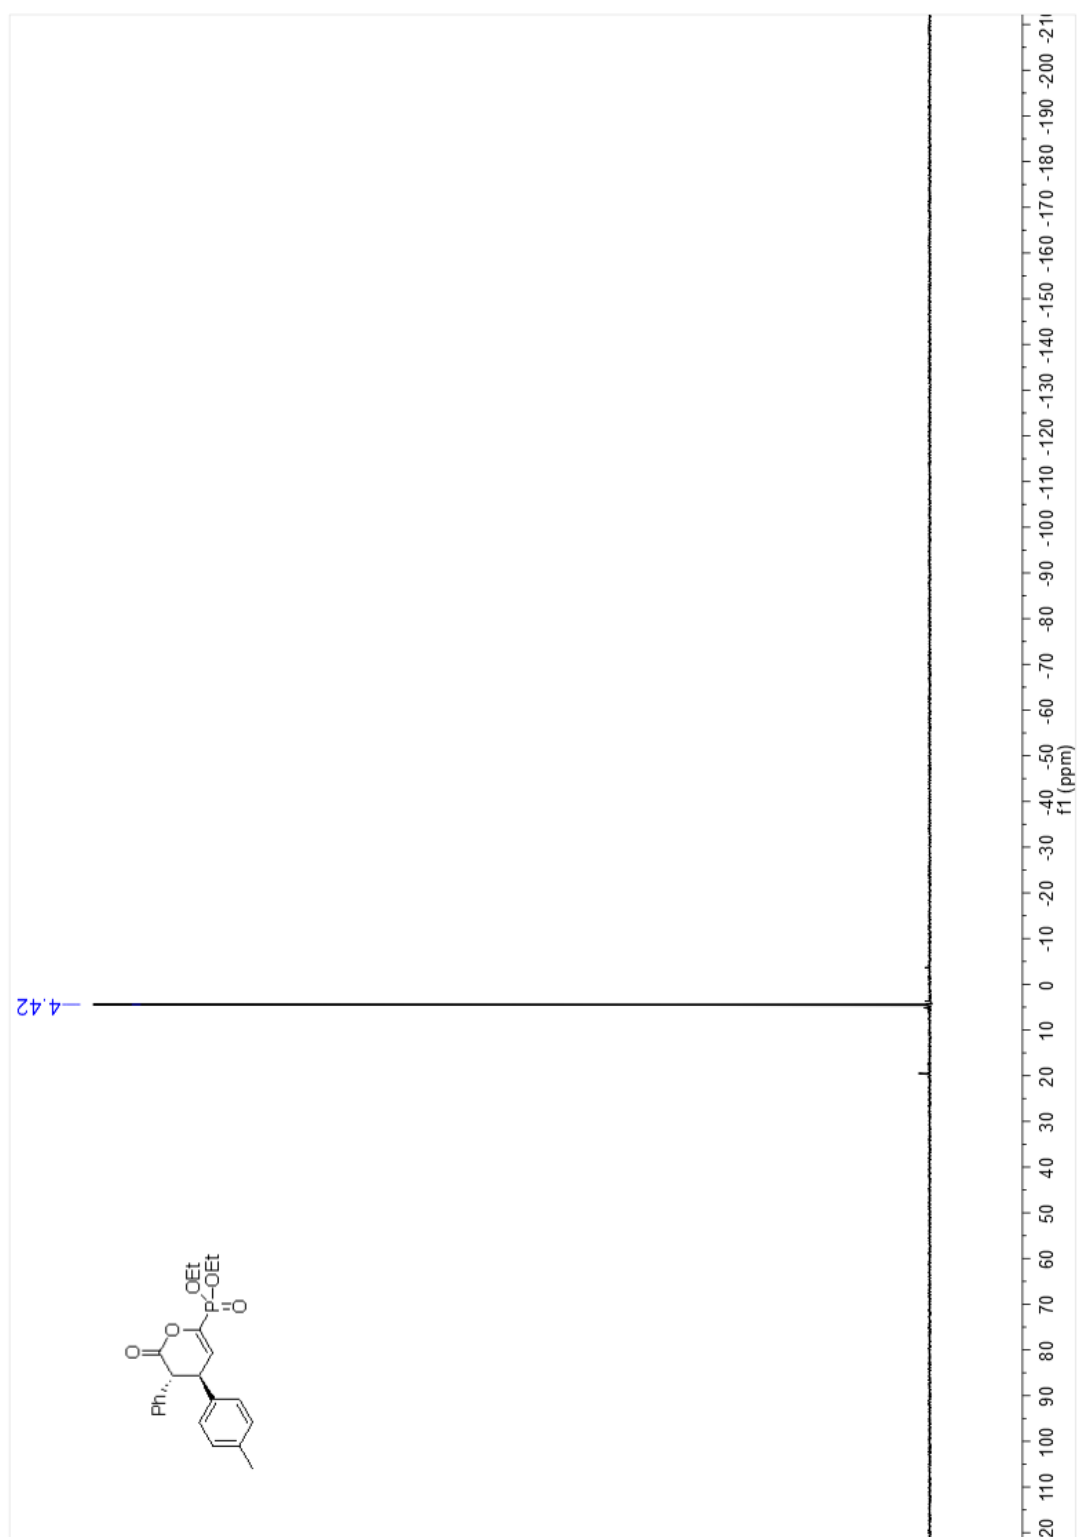

$^1\text{H}$  NMR spectrum of product **3c**

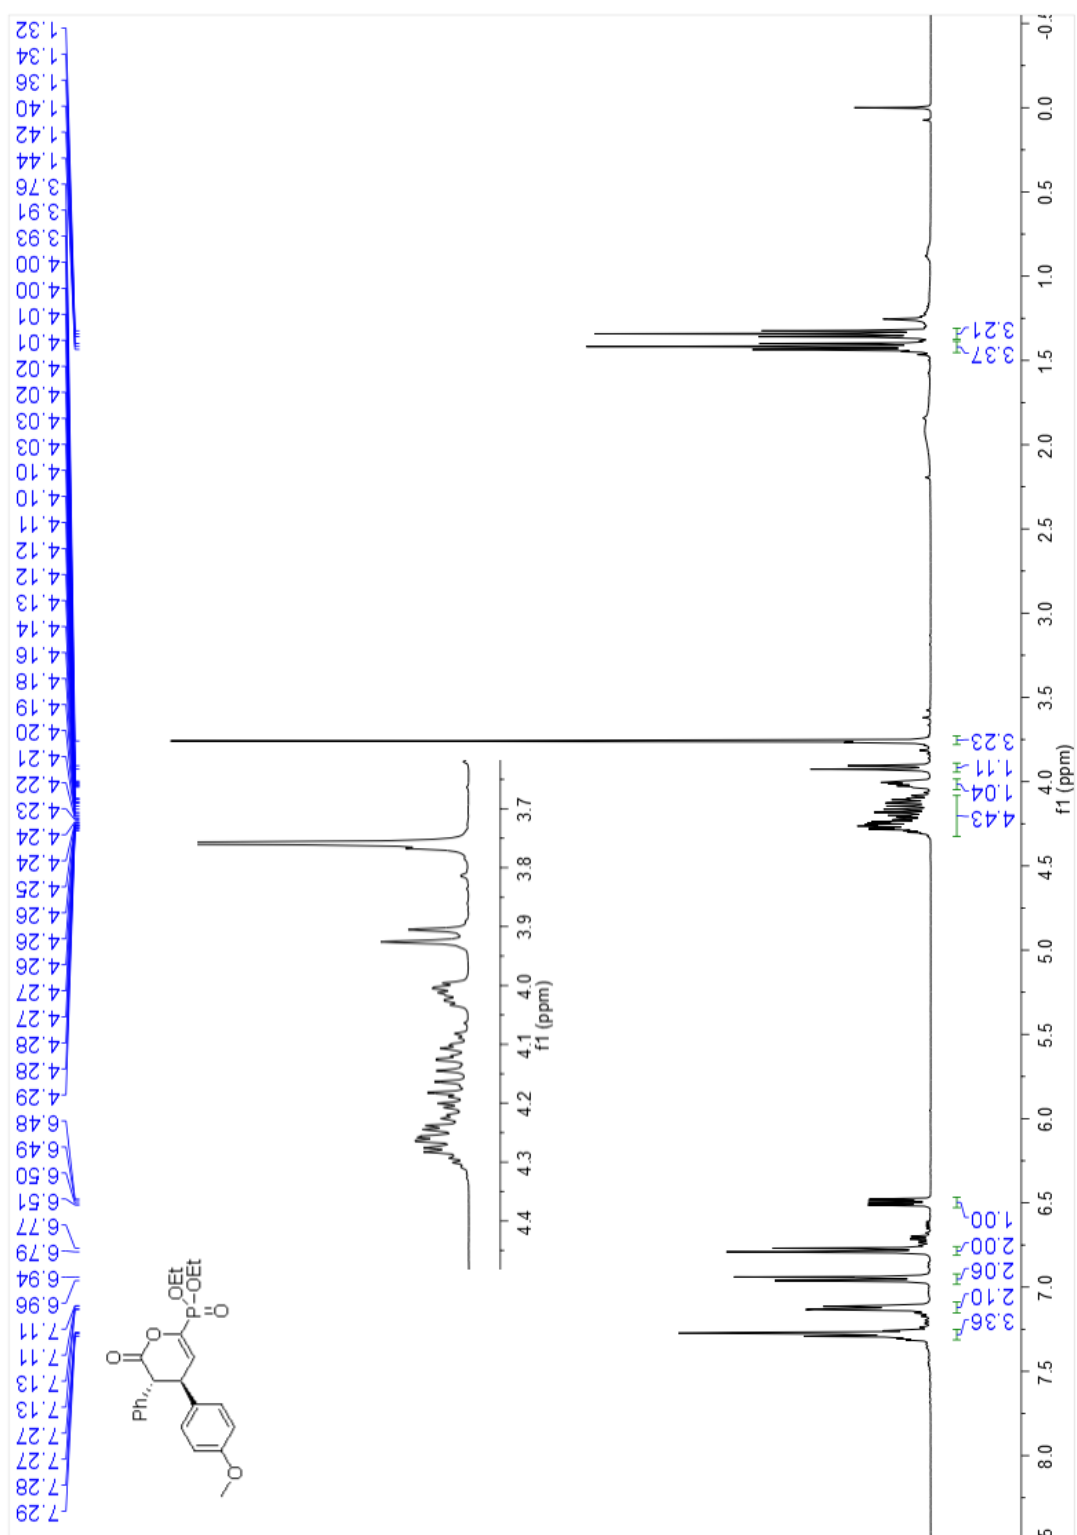

<sup>13</sup>C NMR spectrum of product **3c**

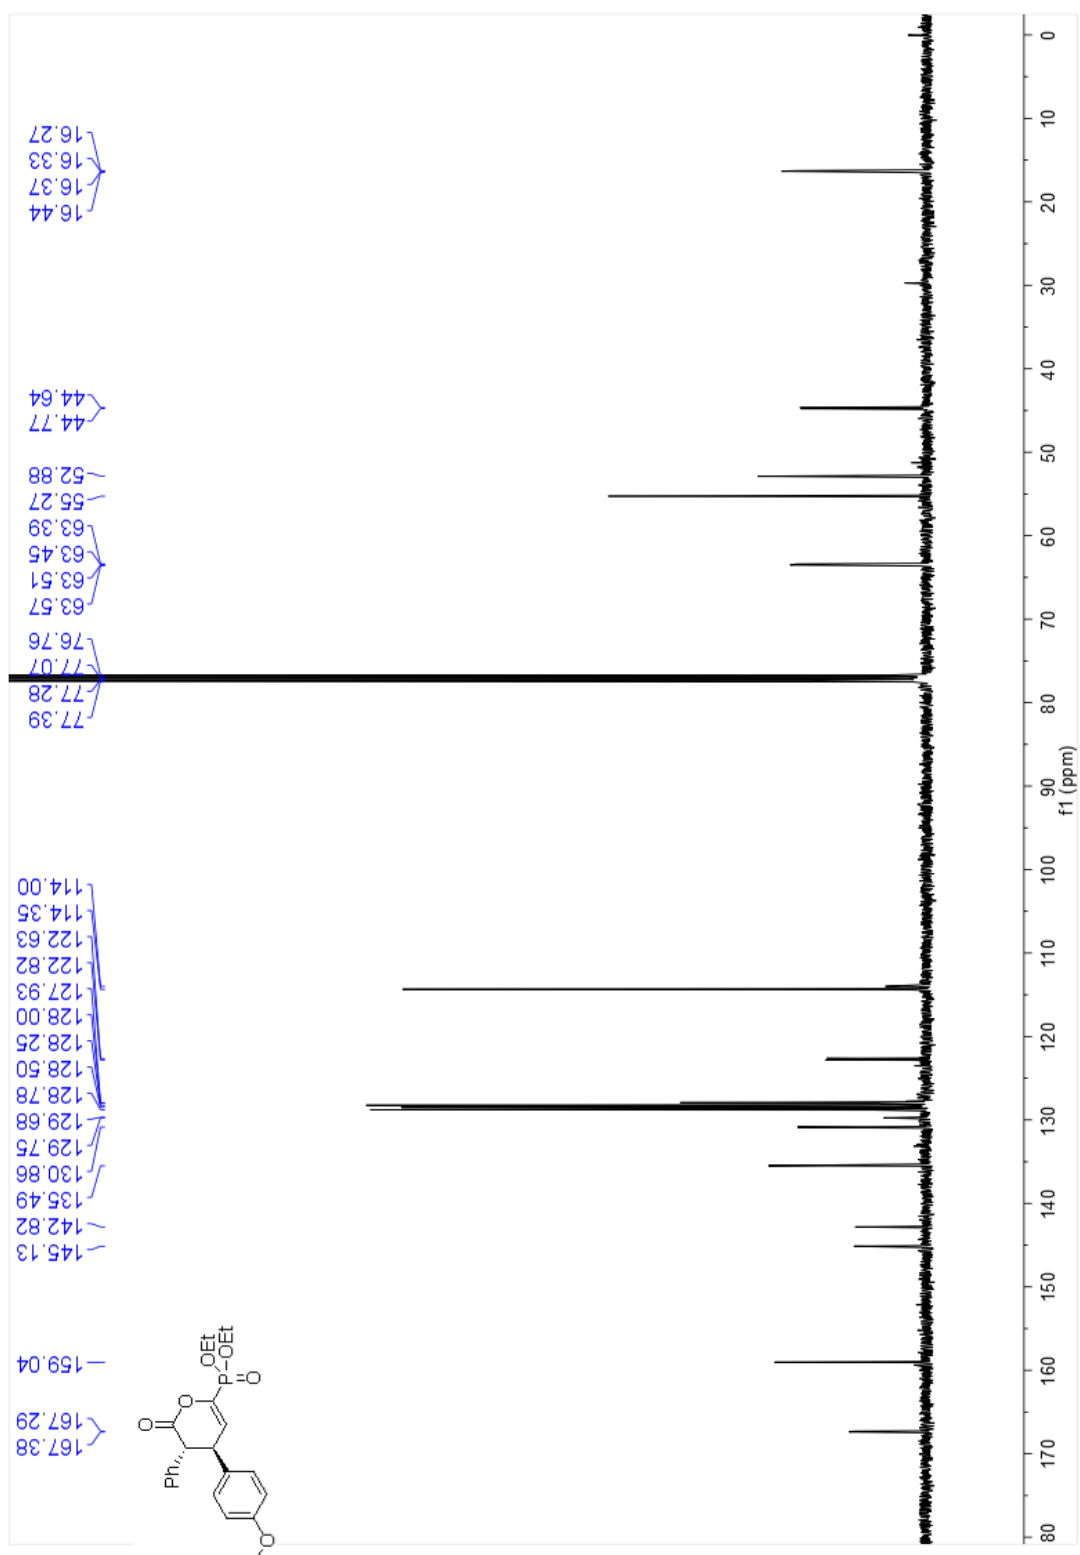

<sup>31</sup>P NMR spectrum of product **3c**

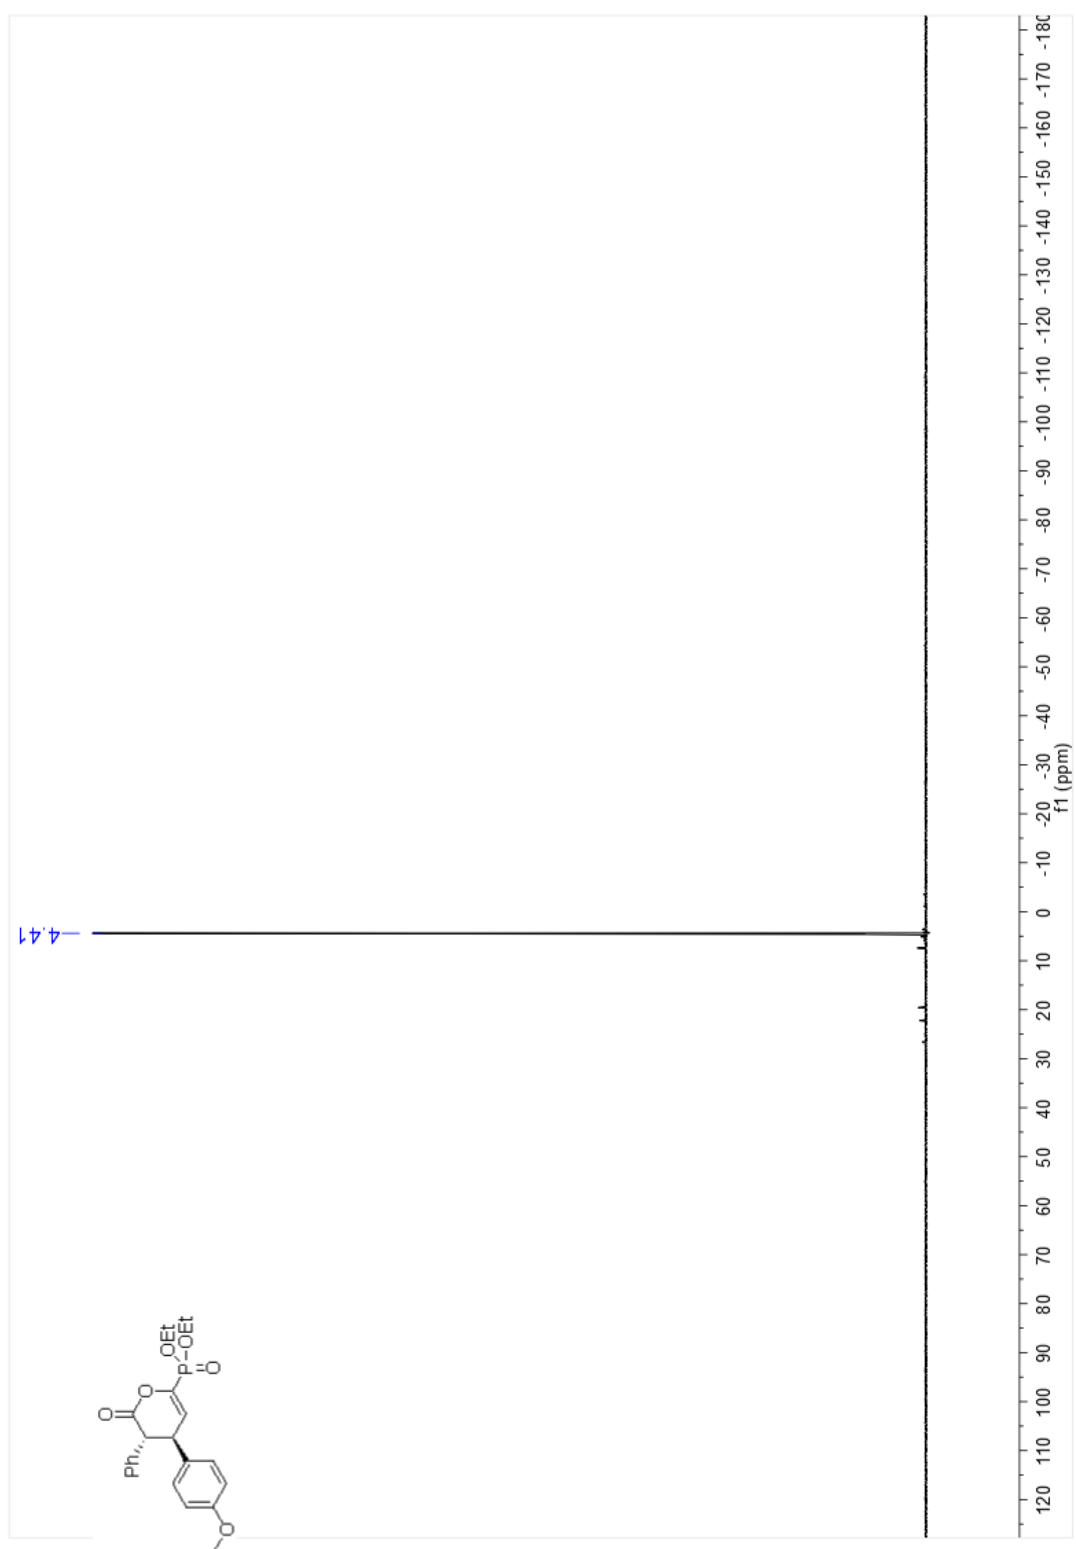

<sup>1</sup>H NMR spectrum of product **3d**

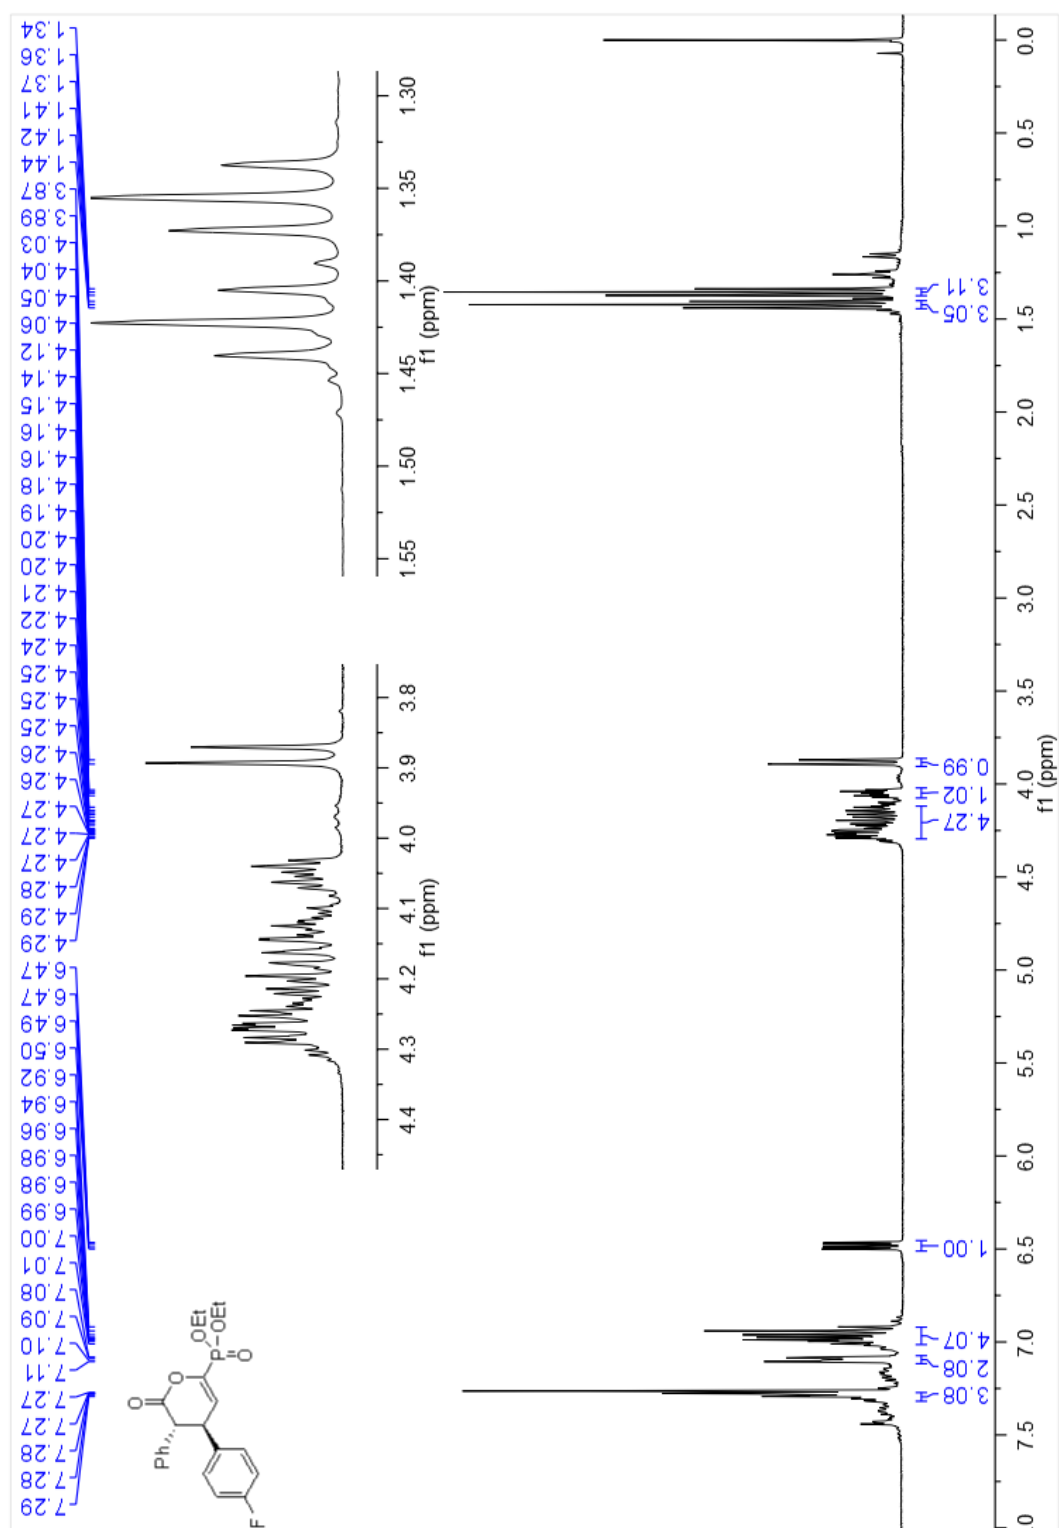

<sup>13</sup>C NMR spectrum of product **3d**

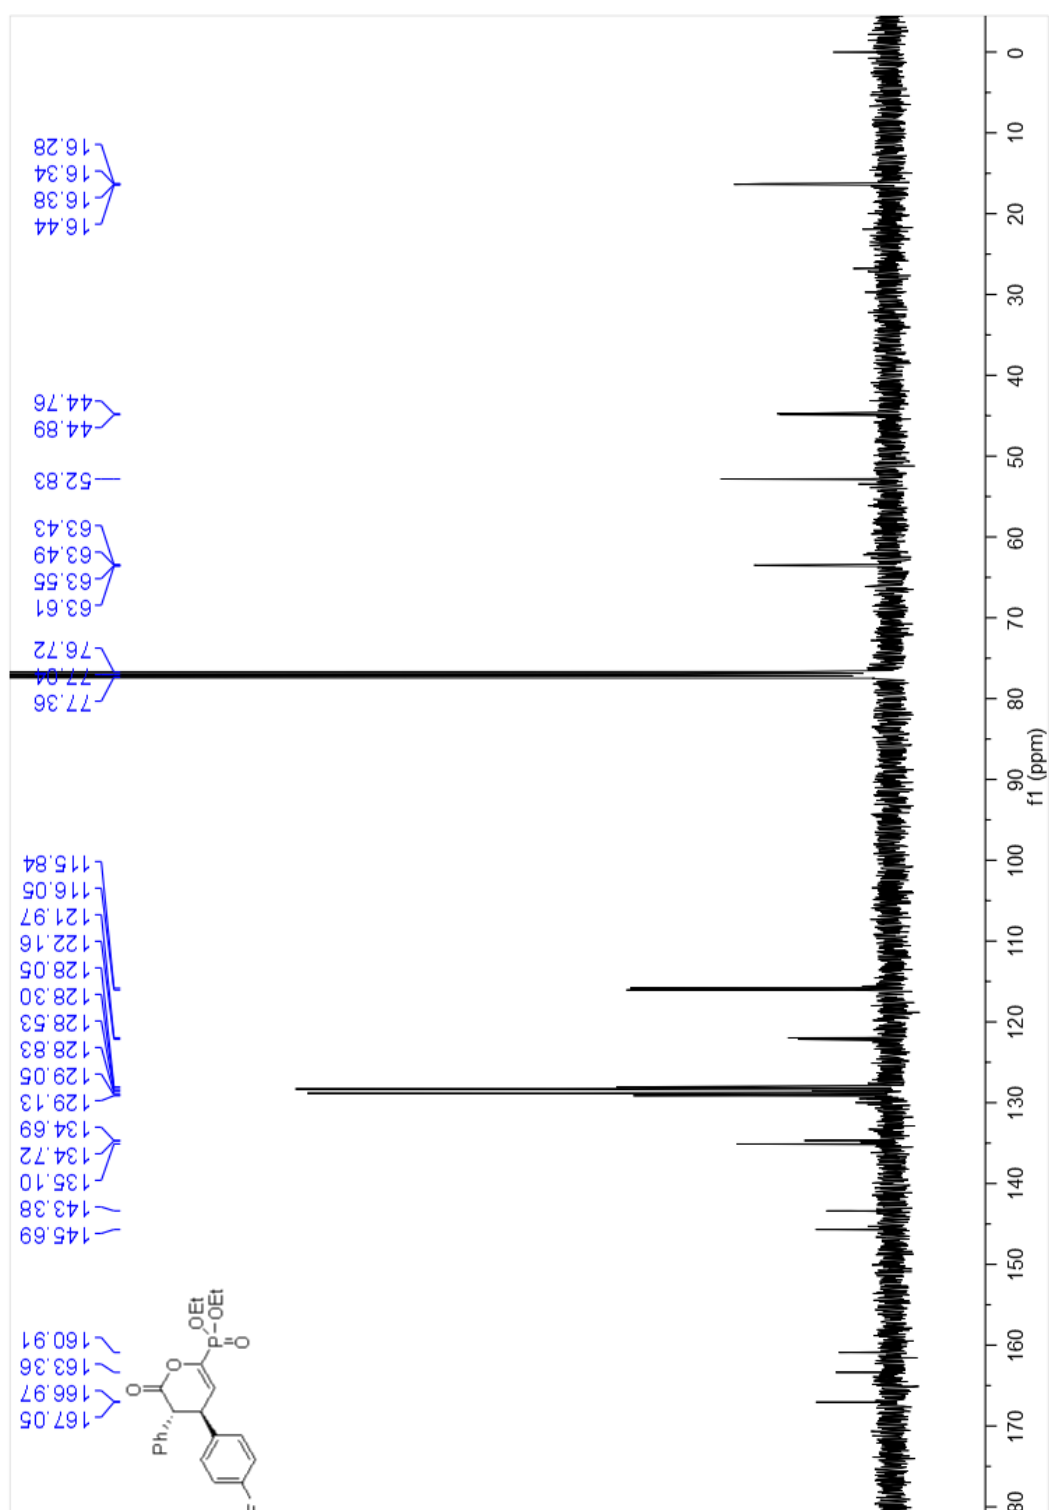



$^{31}\text{P}$  NMR spectrum of product **3d**

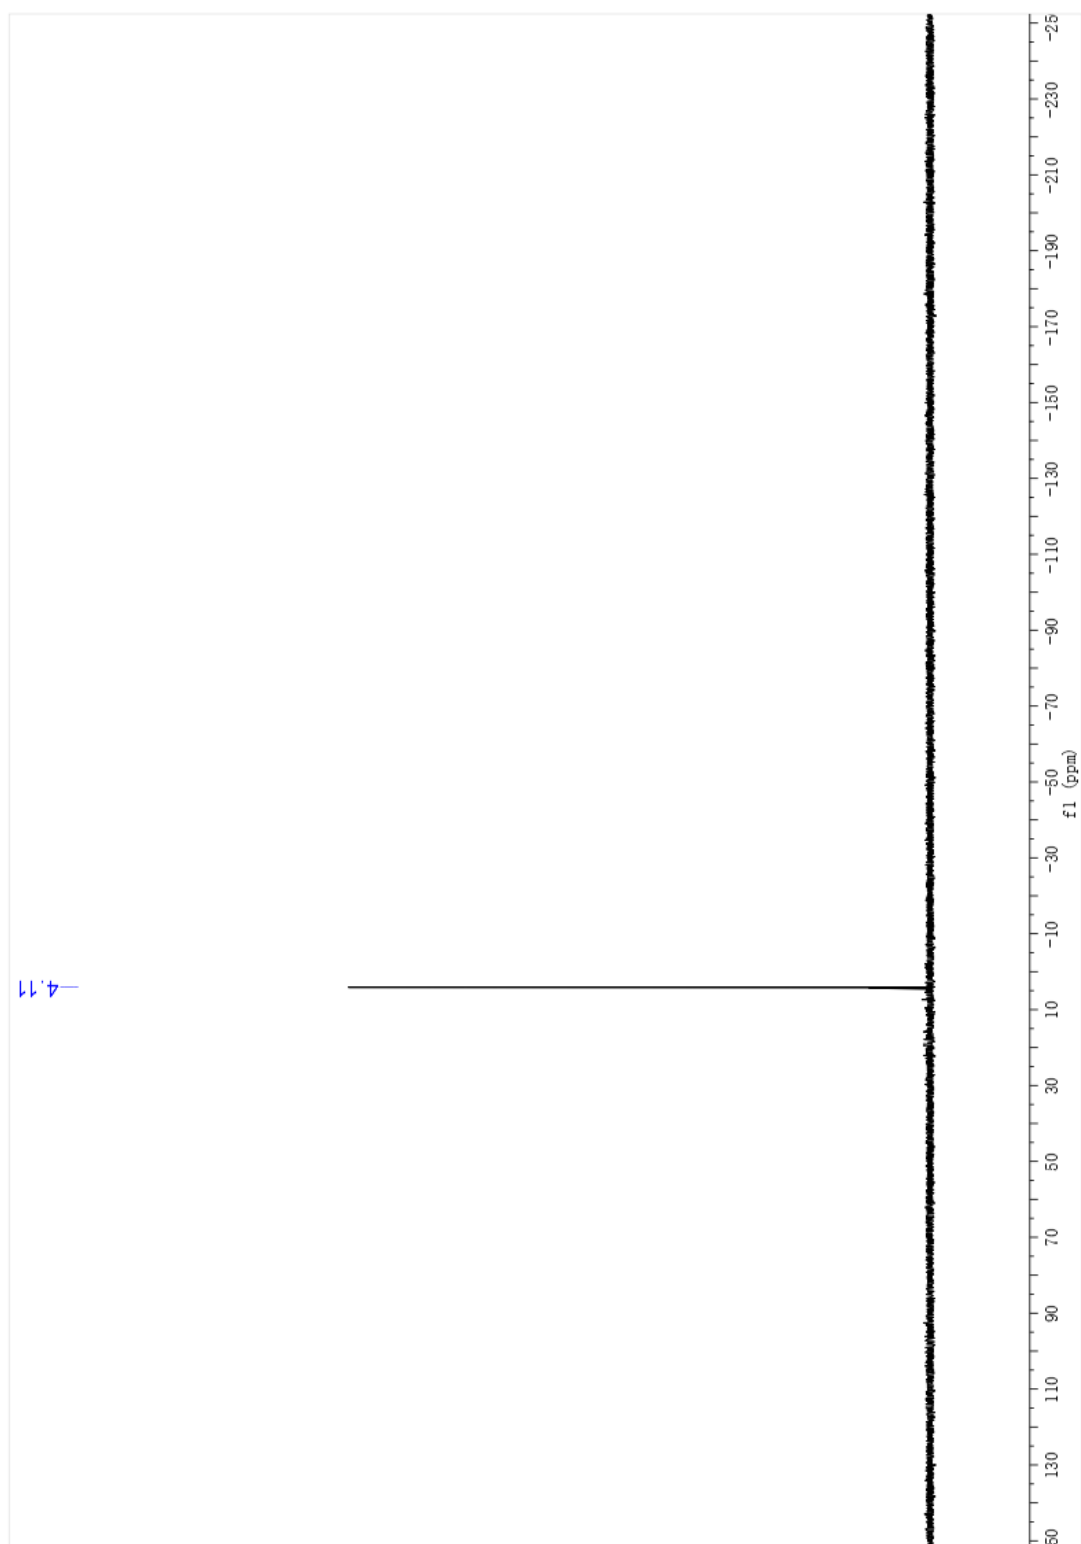

<sup>19</sup>F NMR spectrum of product **3d**

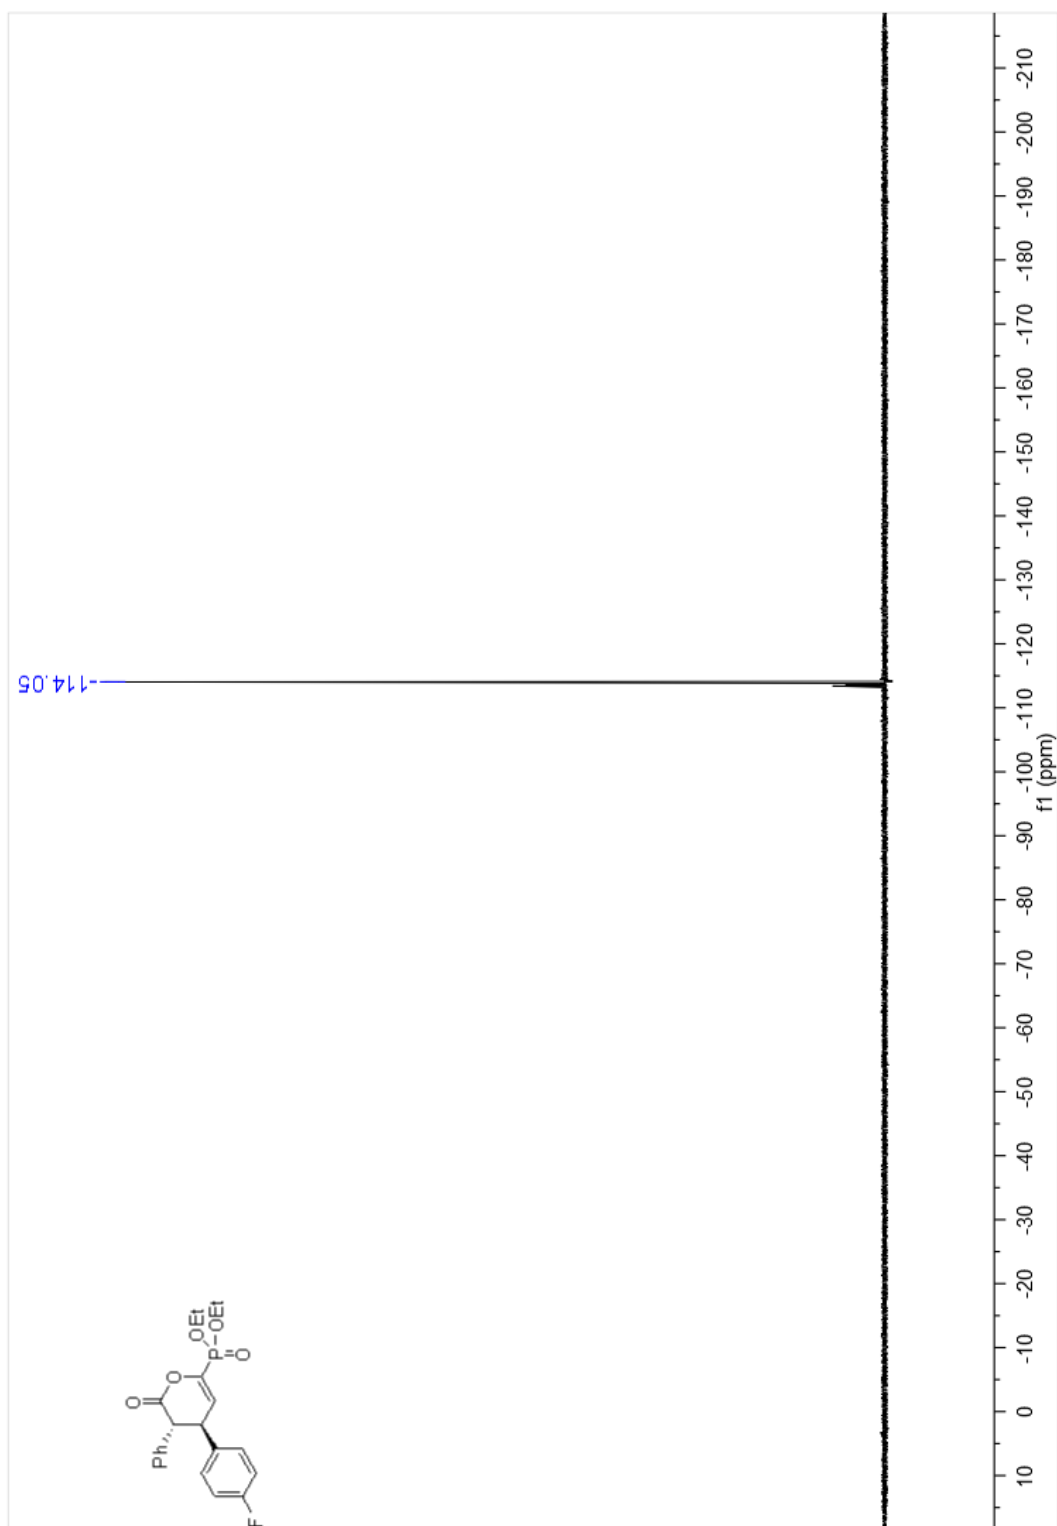

$^1\text{H}$  NMR spectrum of product **3e**

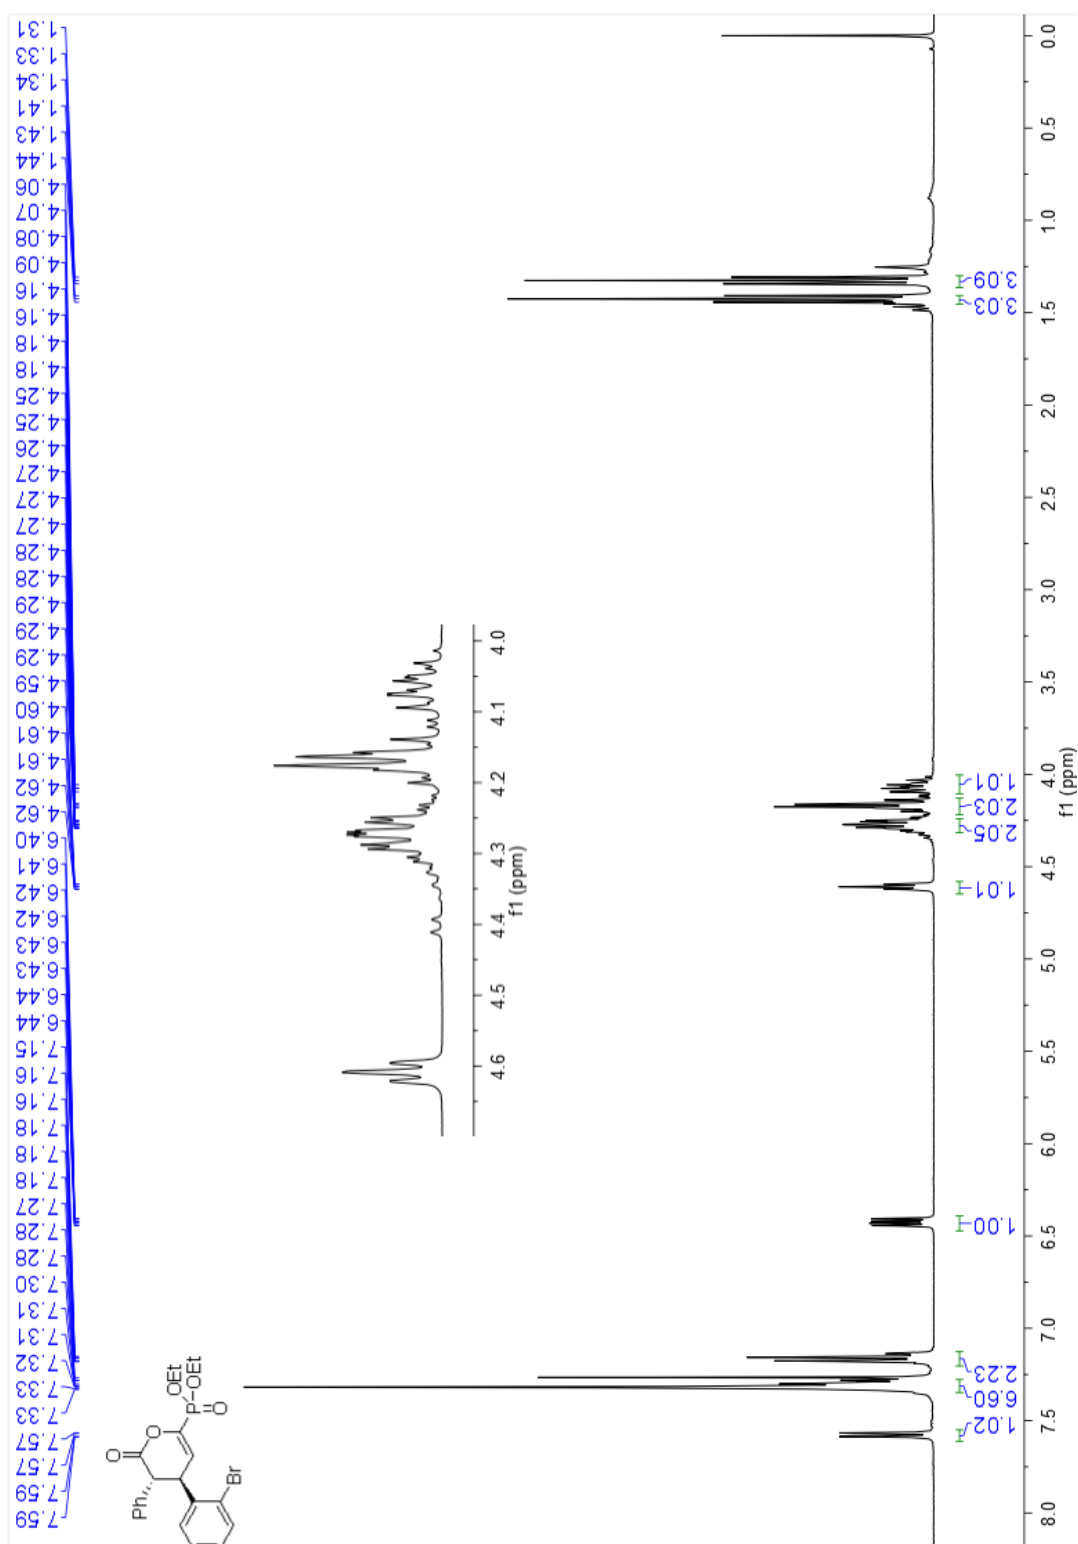

<sup>13</sup>C NMR spectrum of product **3e**

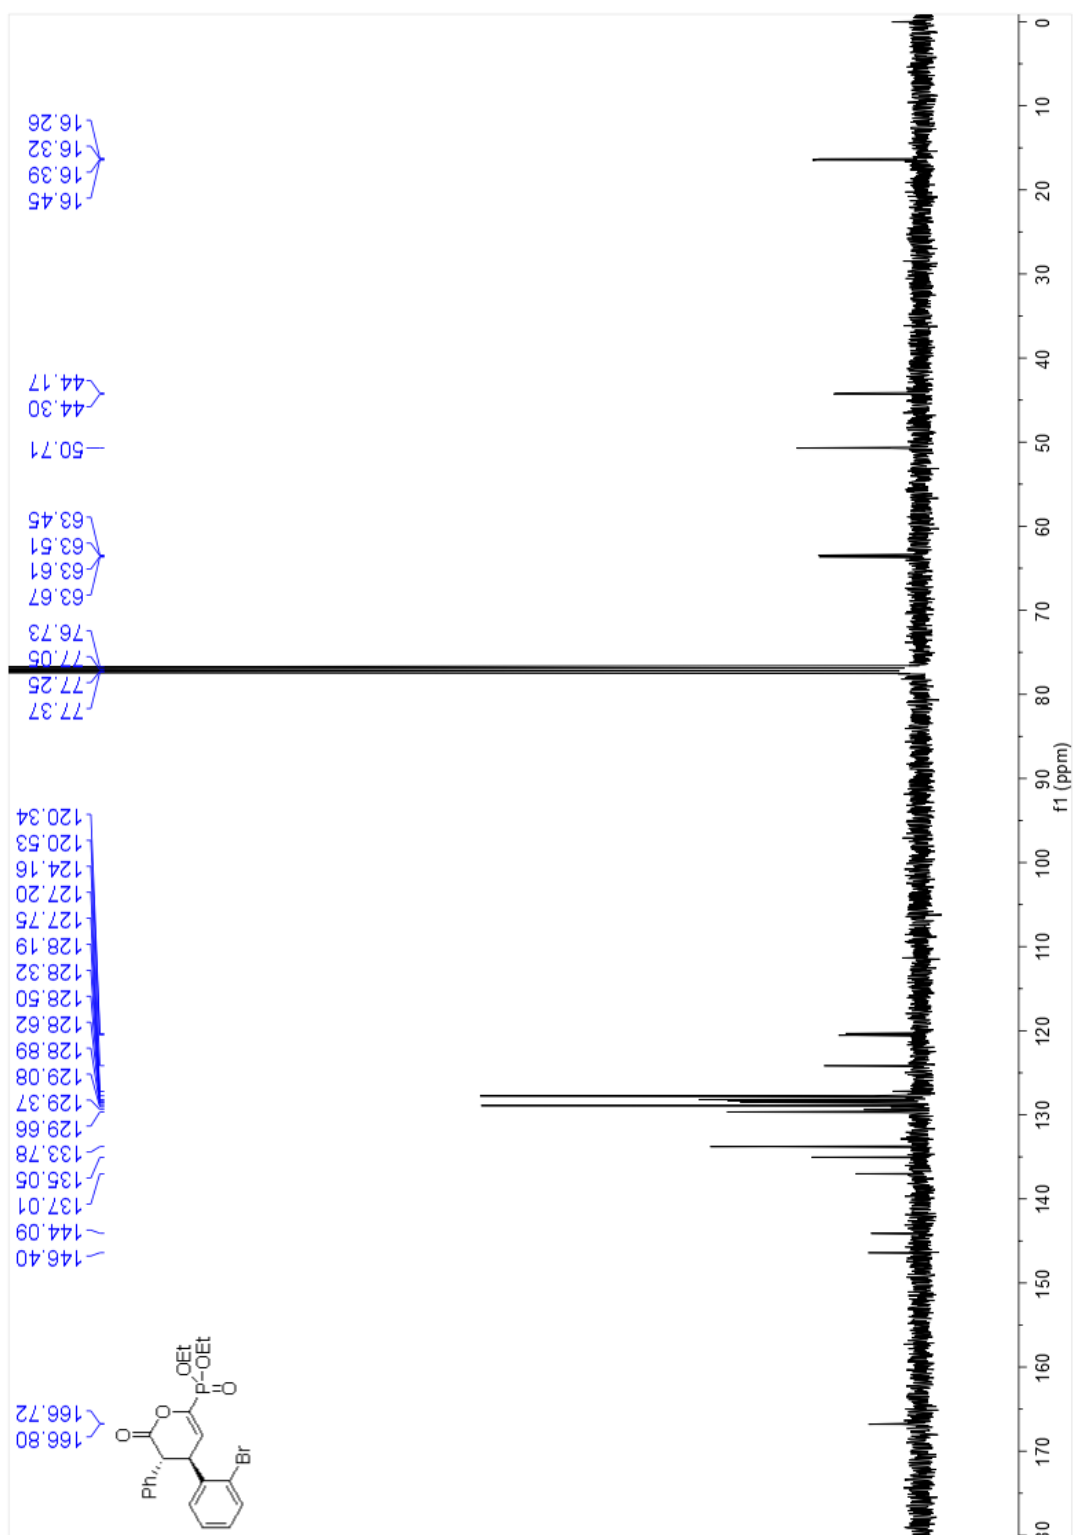

<sup>31</sup>P NMR spectrum of product **3e**

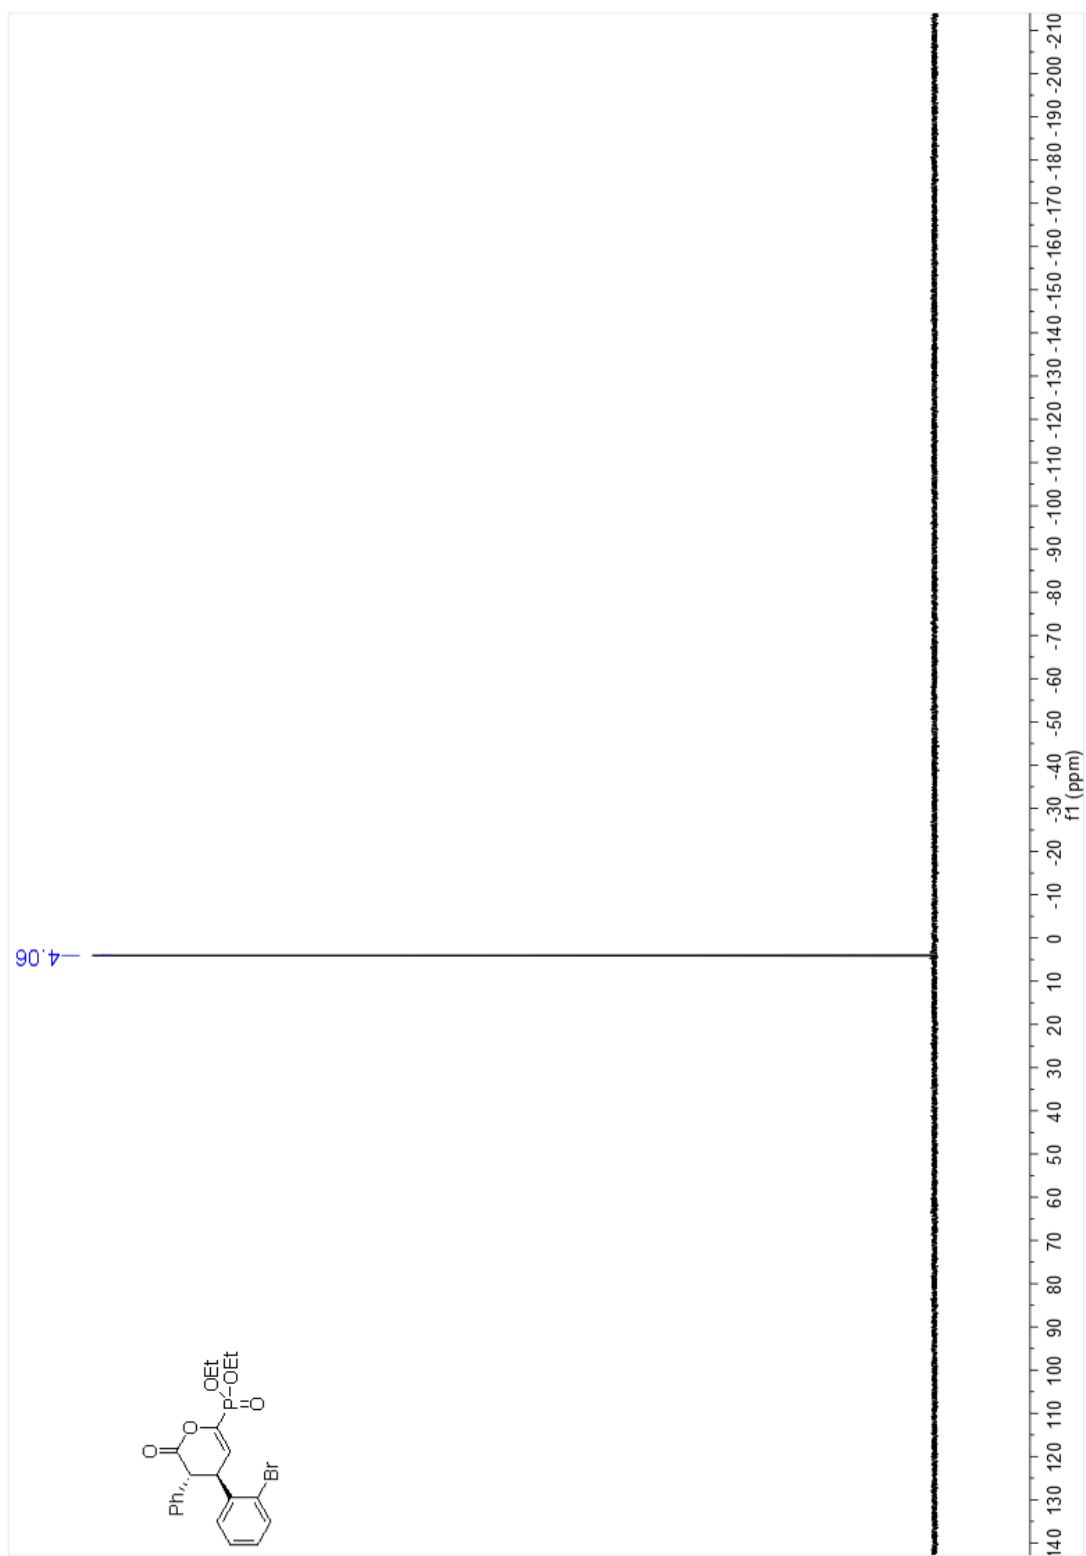

<sup>1</sup>H NMR spectrum of product 3f

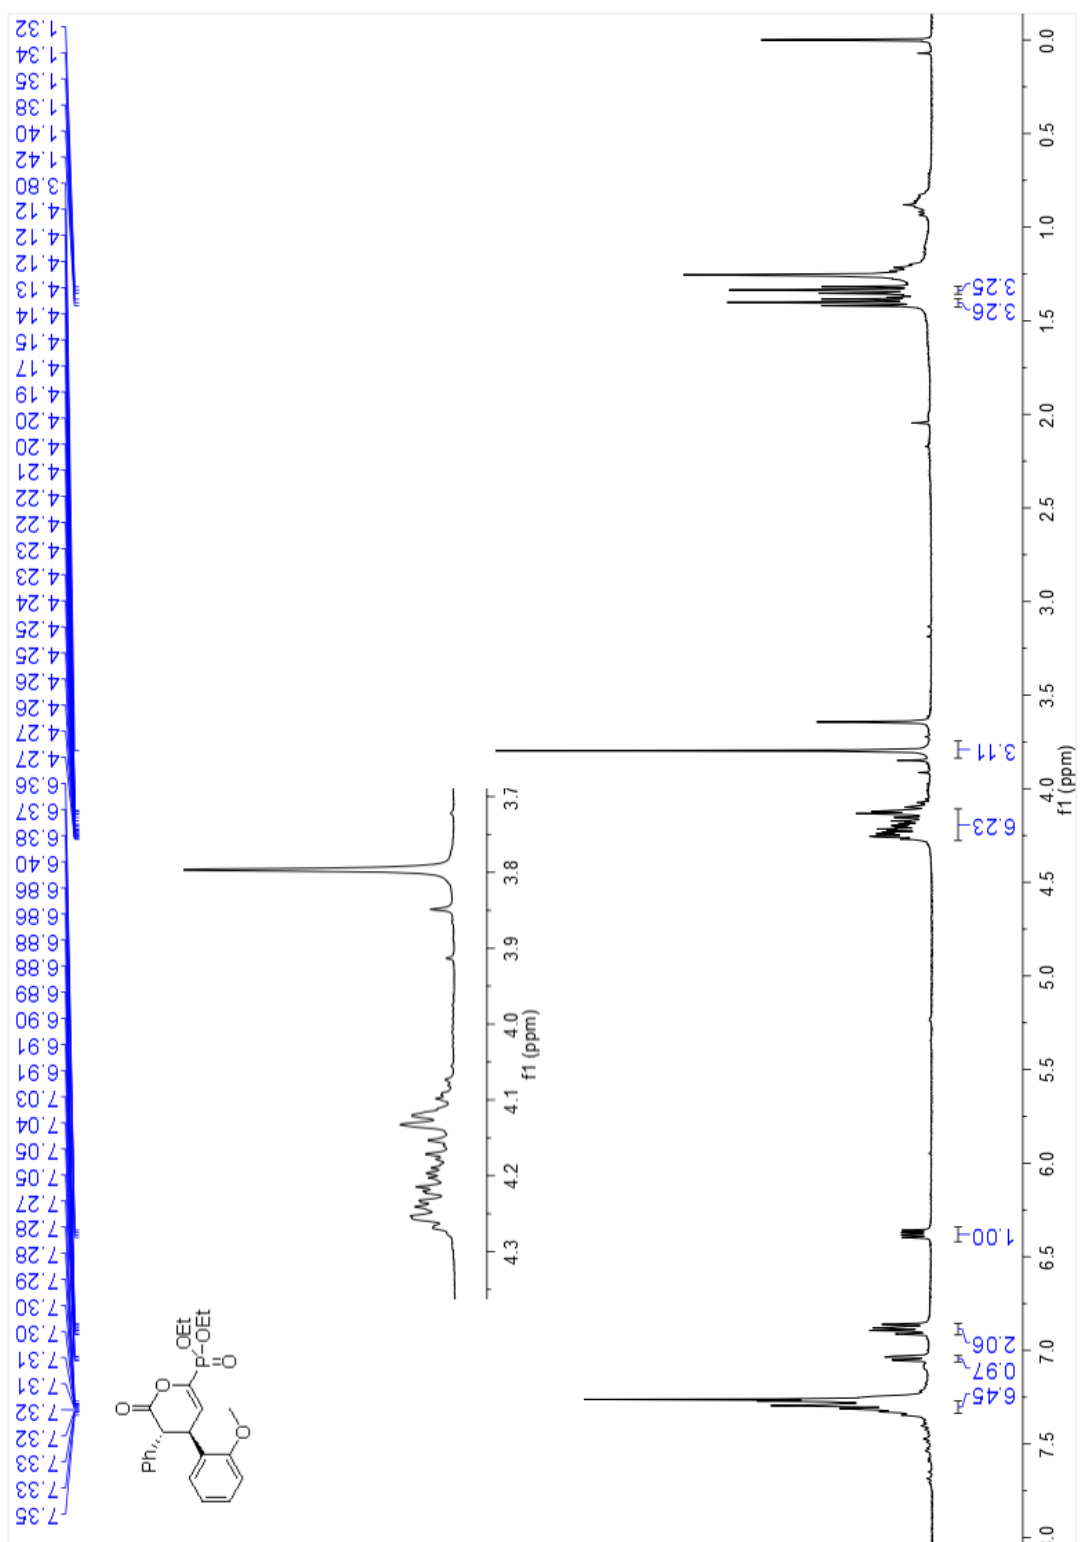

<sup>13</sup>C NMR spectrum of product **3f**

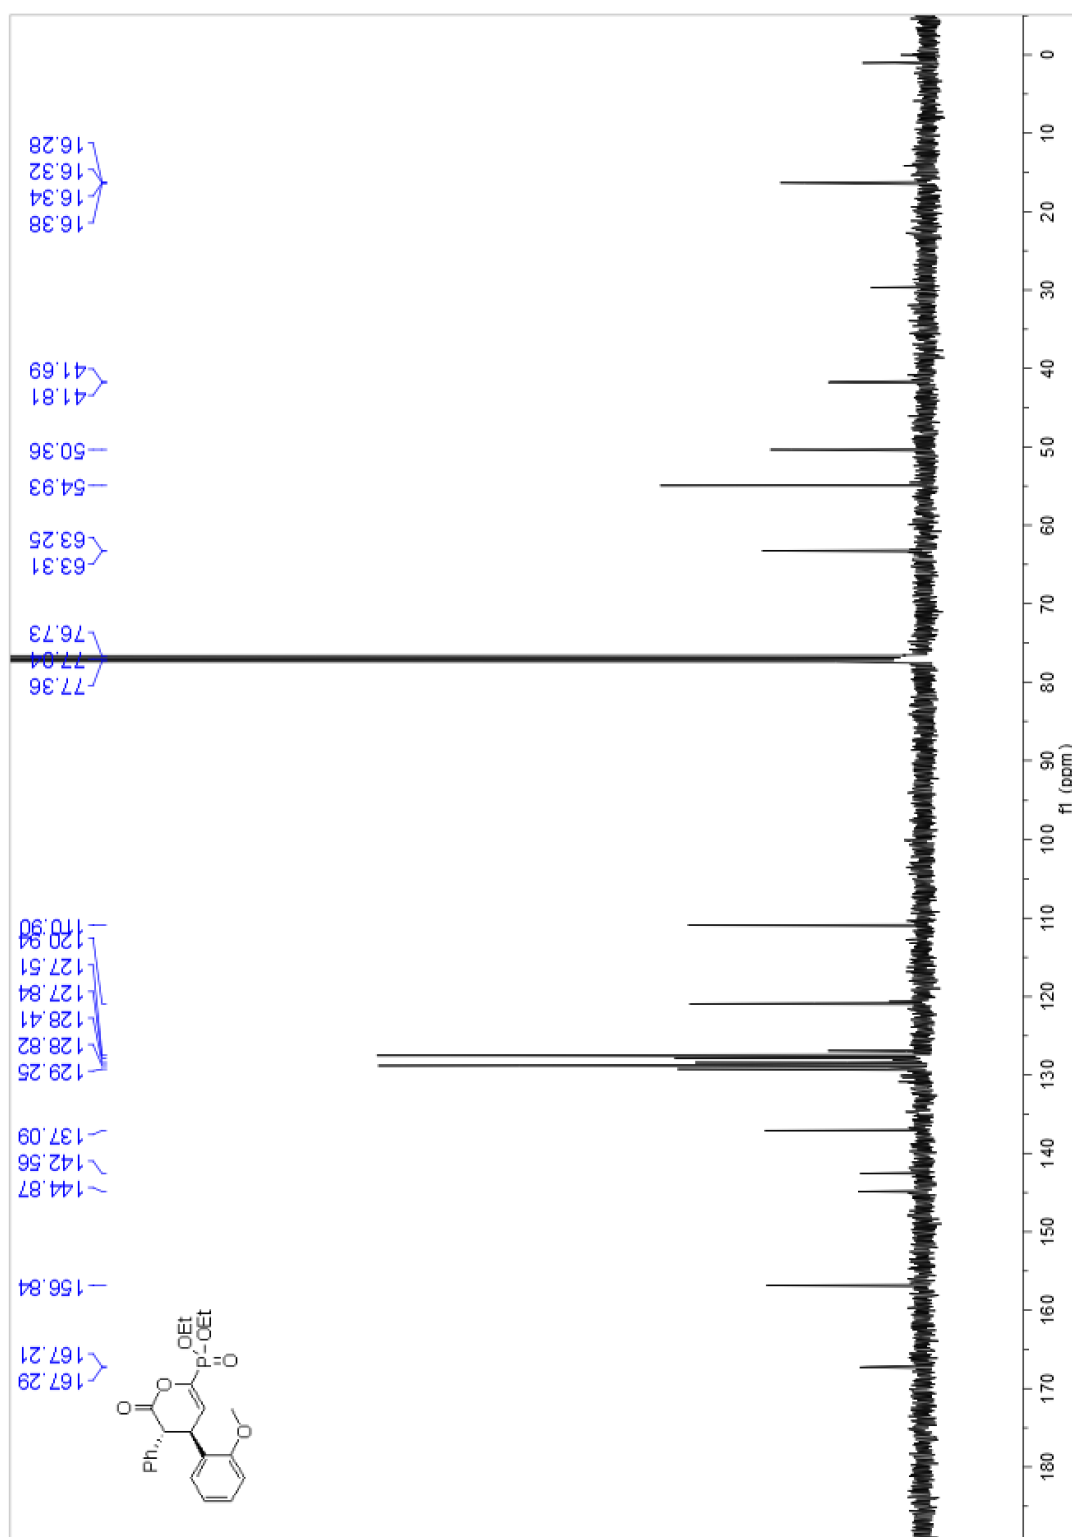

<sup>31</sup>P NMR spectrum of product **3f**

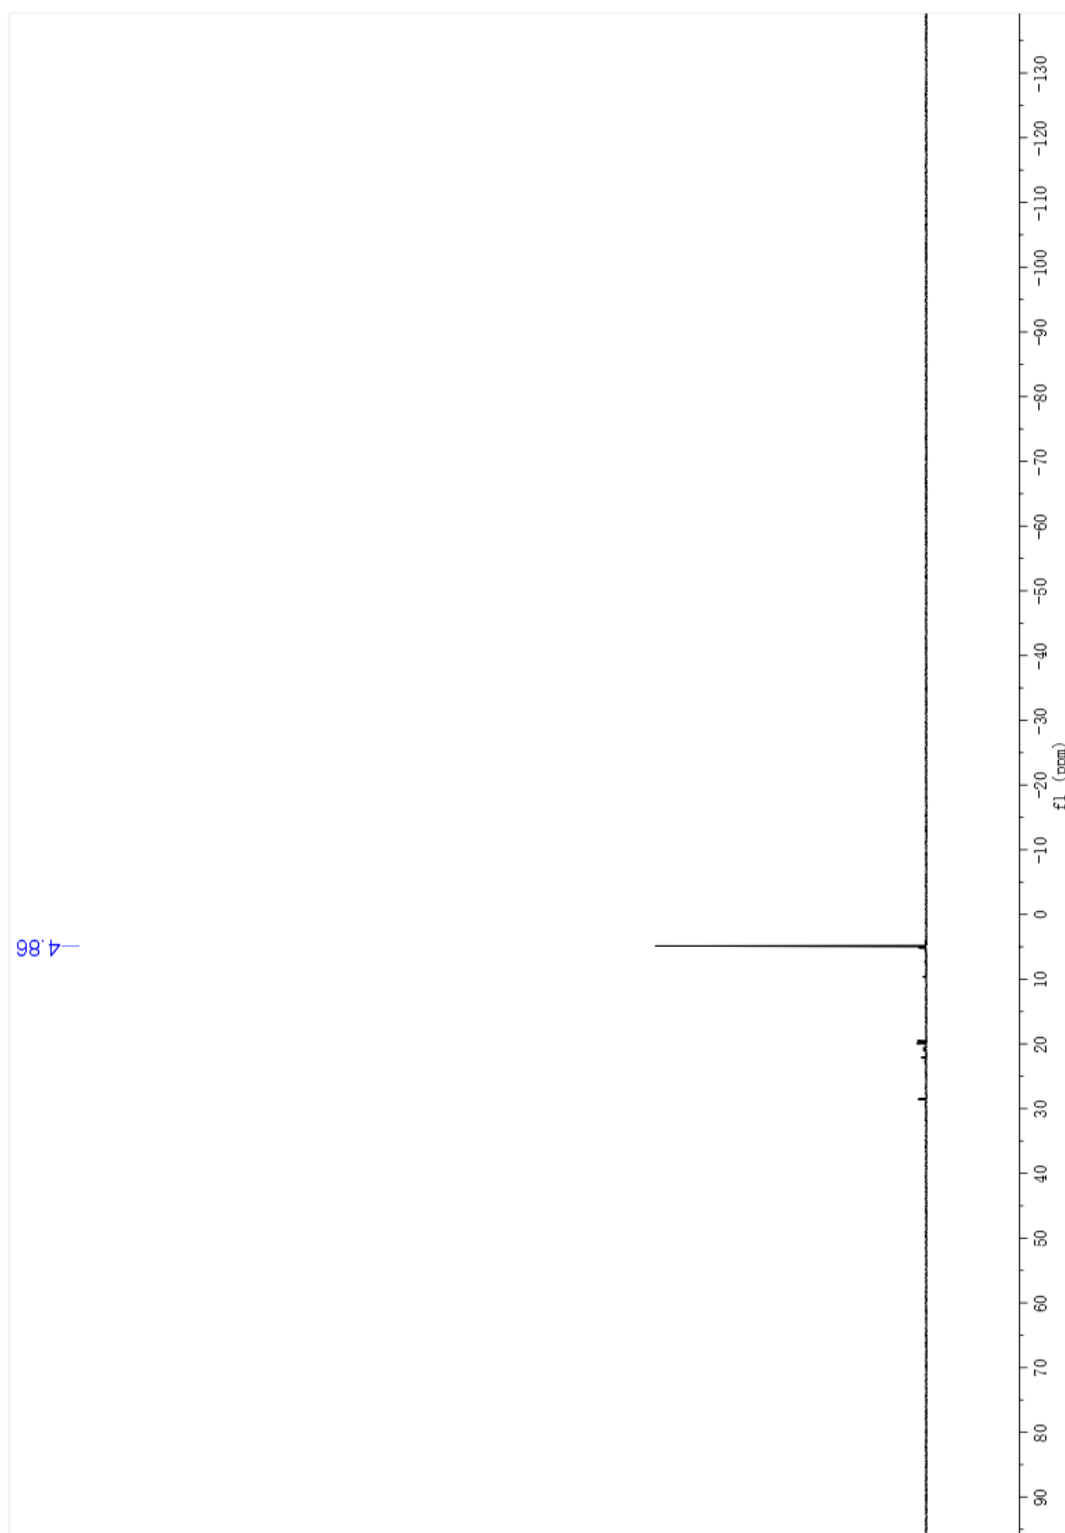



<sup>1</sup>H NMR spectrum of product **3g**

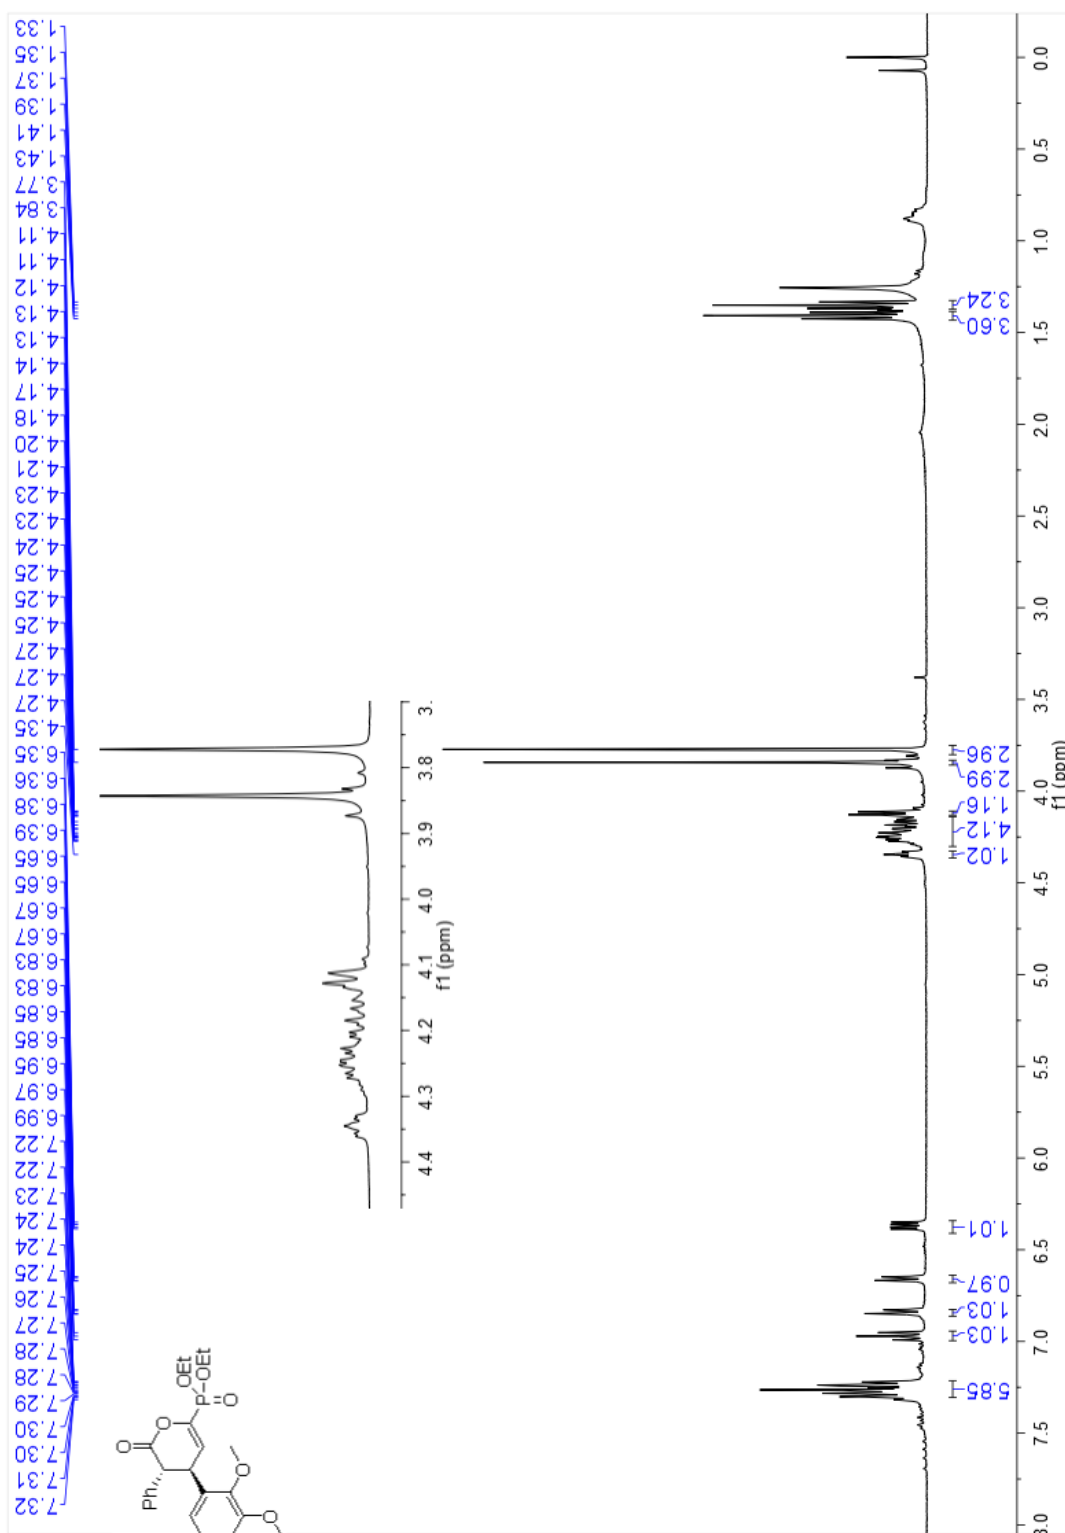

<sup>13</sup>C NMR spectrum of product 3g

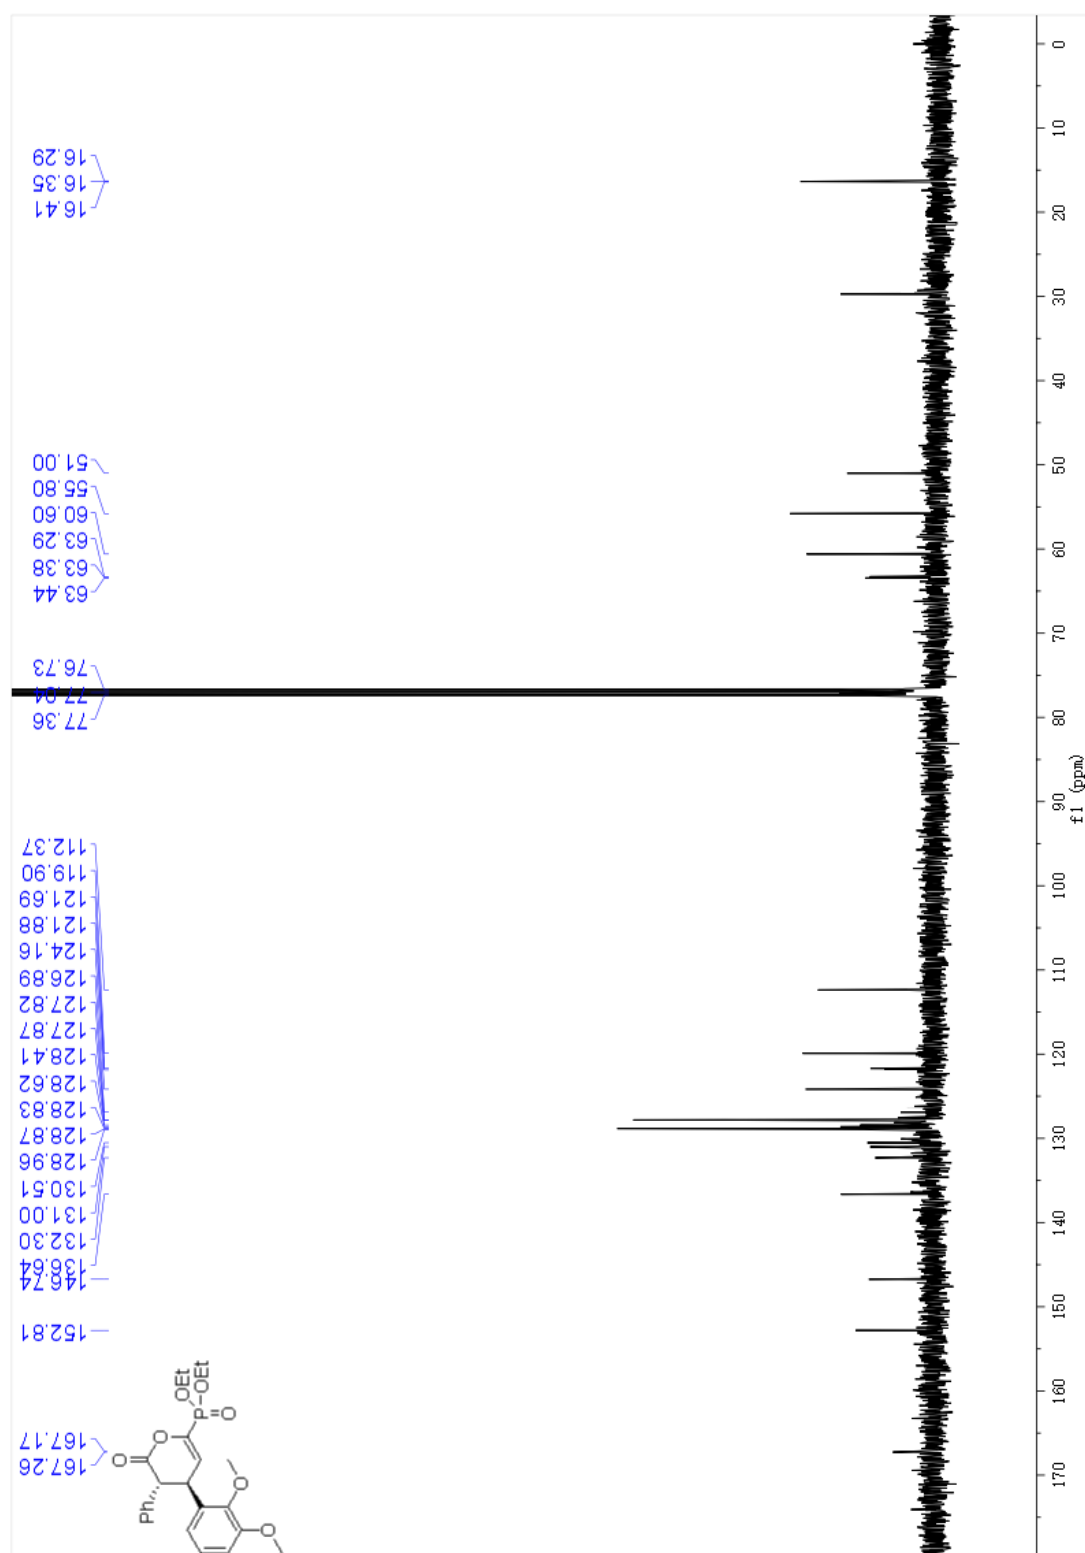

<sup>31</sup>P NMR spectrum of product **3g**

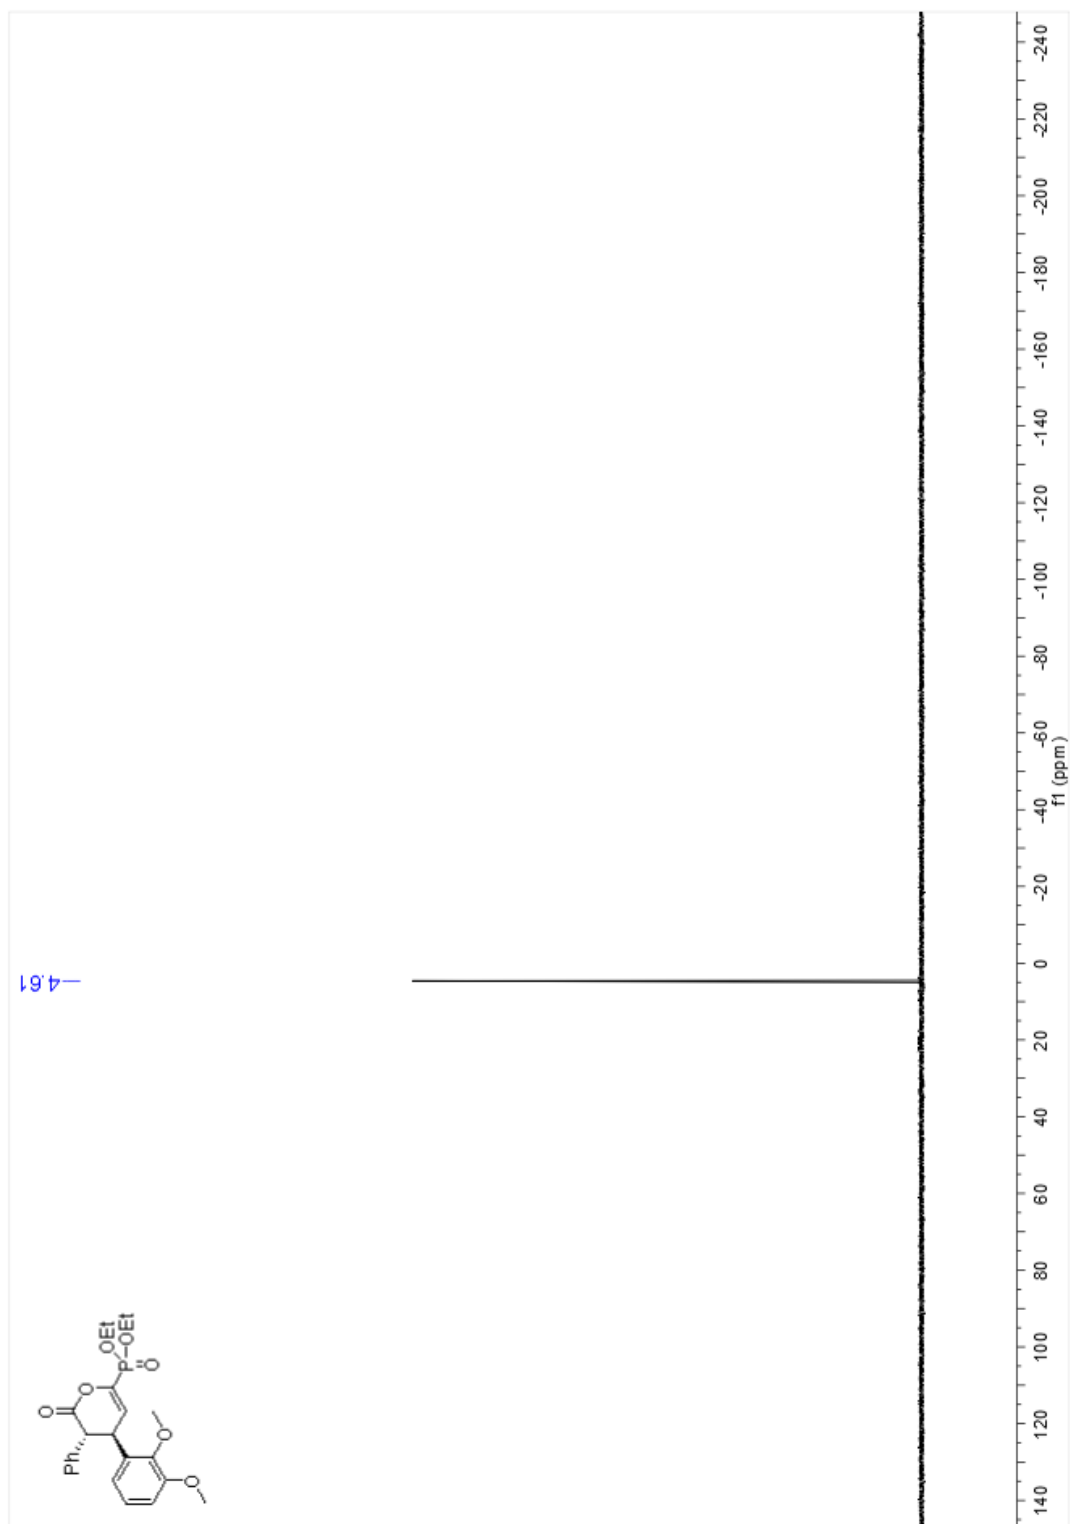

<sup>1</sup>H NMR spectrum of product 3h

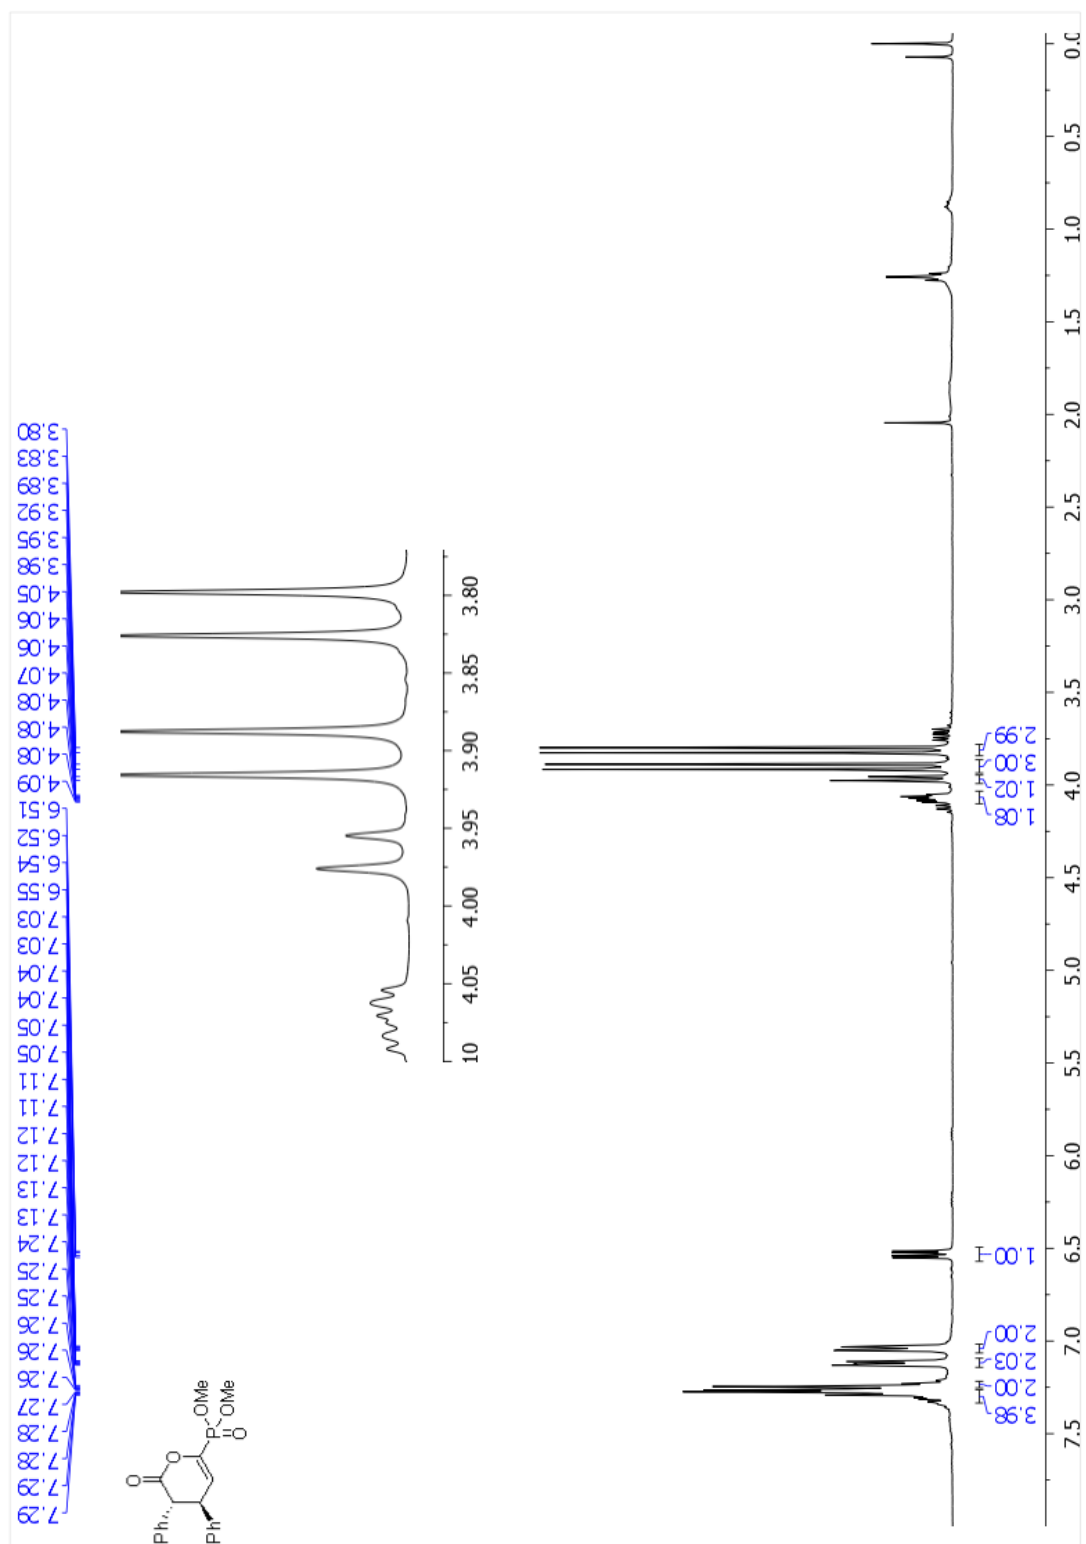

<sup>13</sup>C NMR spectrum of product **3h**

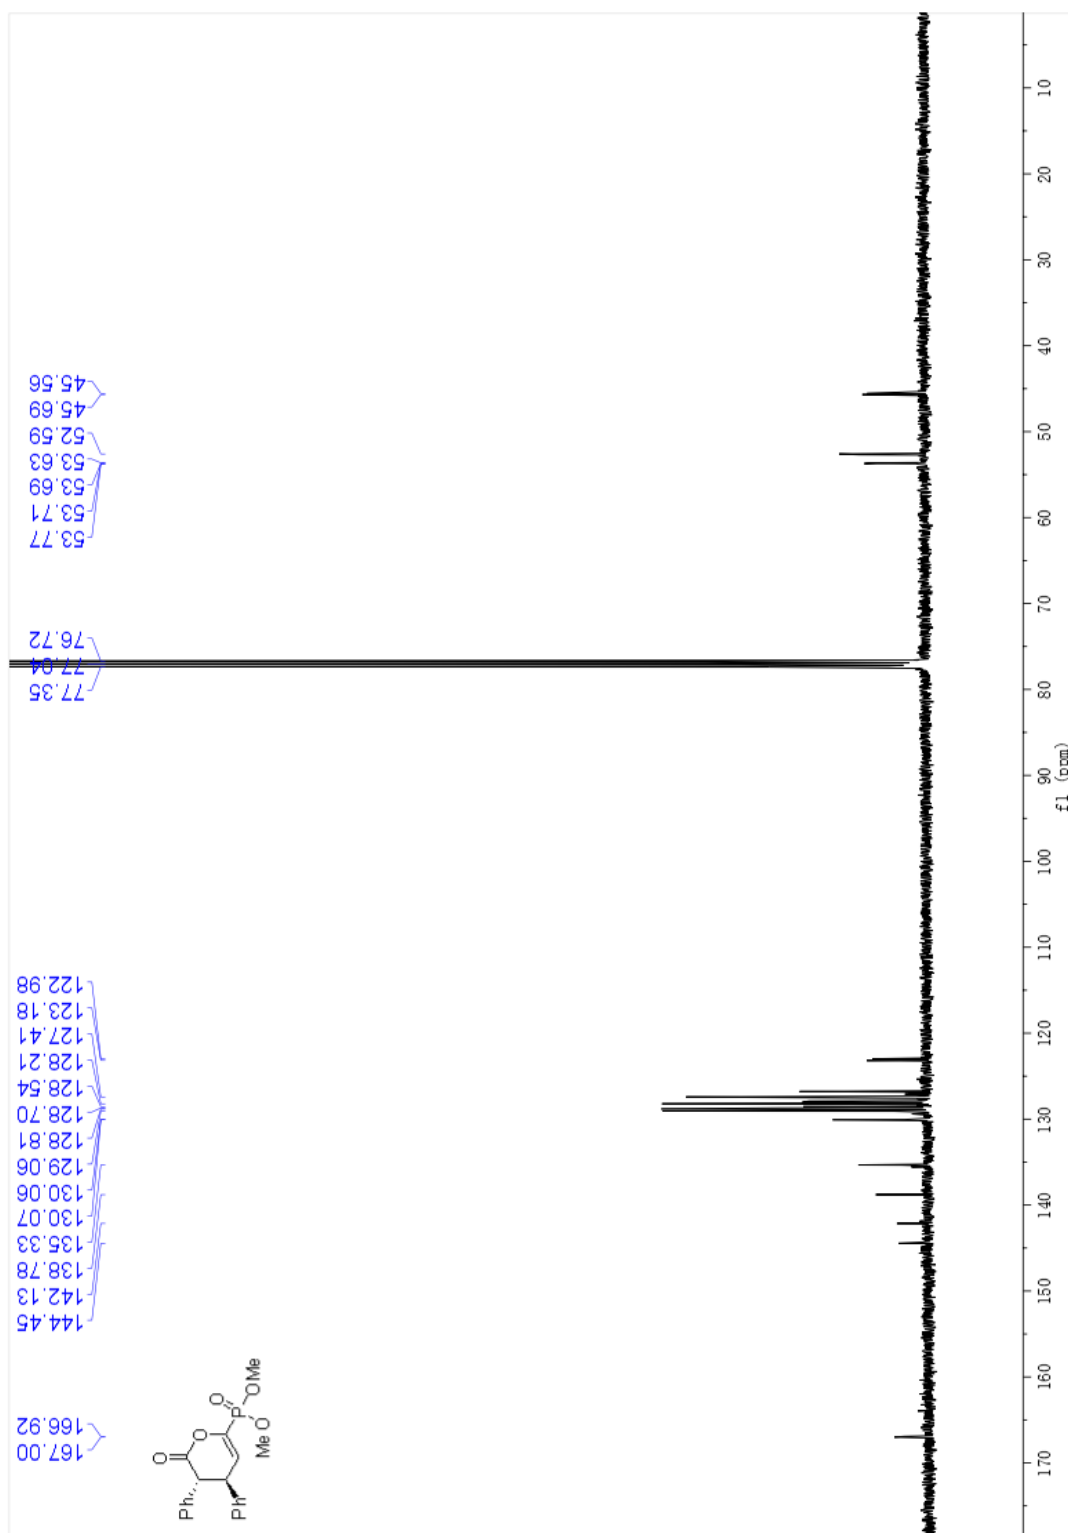

**<sup>31</sup>P NMR spectrum of product 3h**

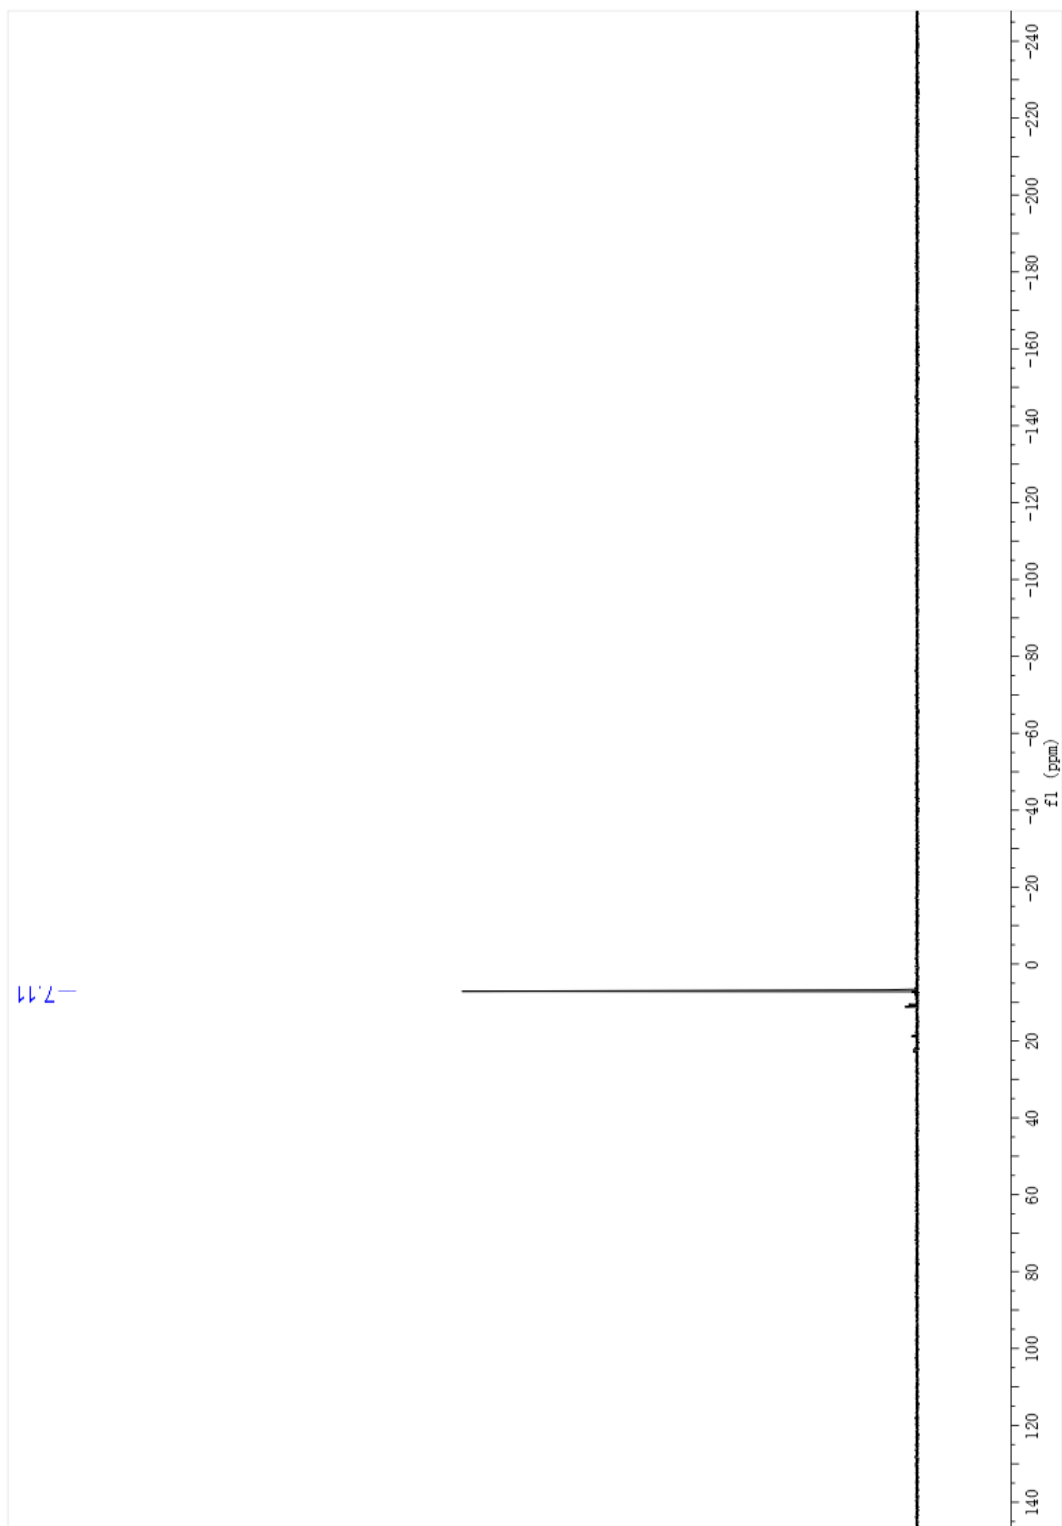

<sup>1</sup>H NMR spectrum of product 3i

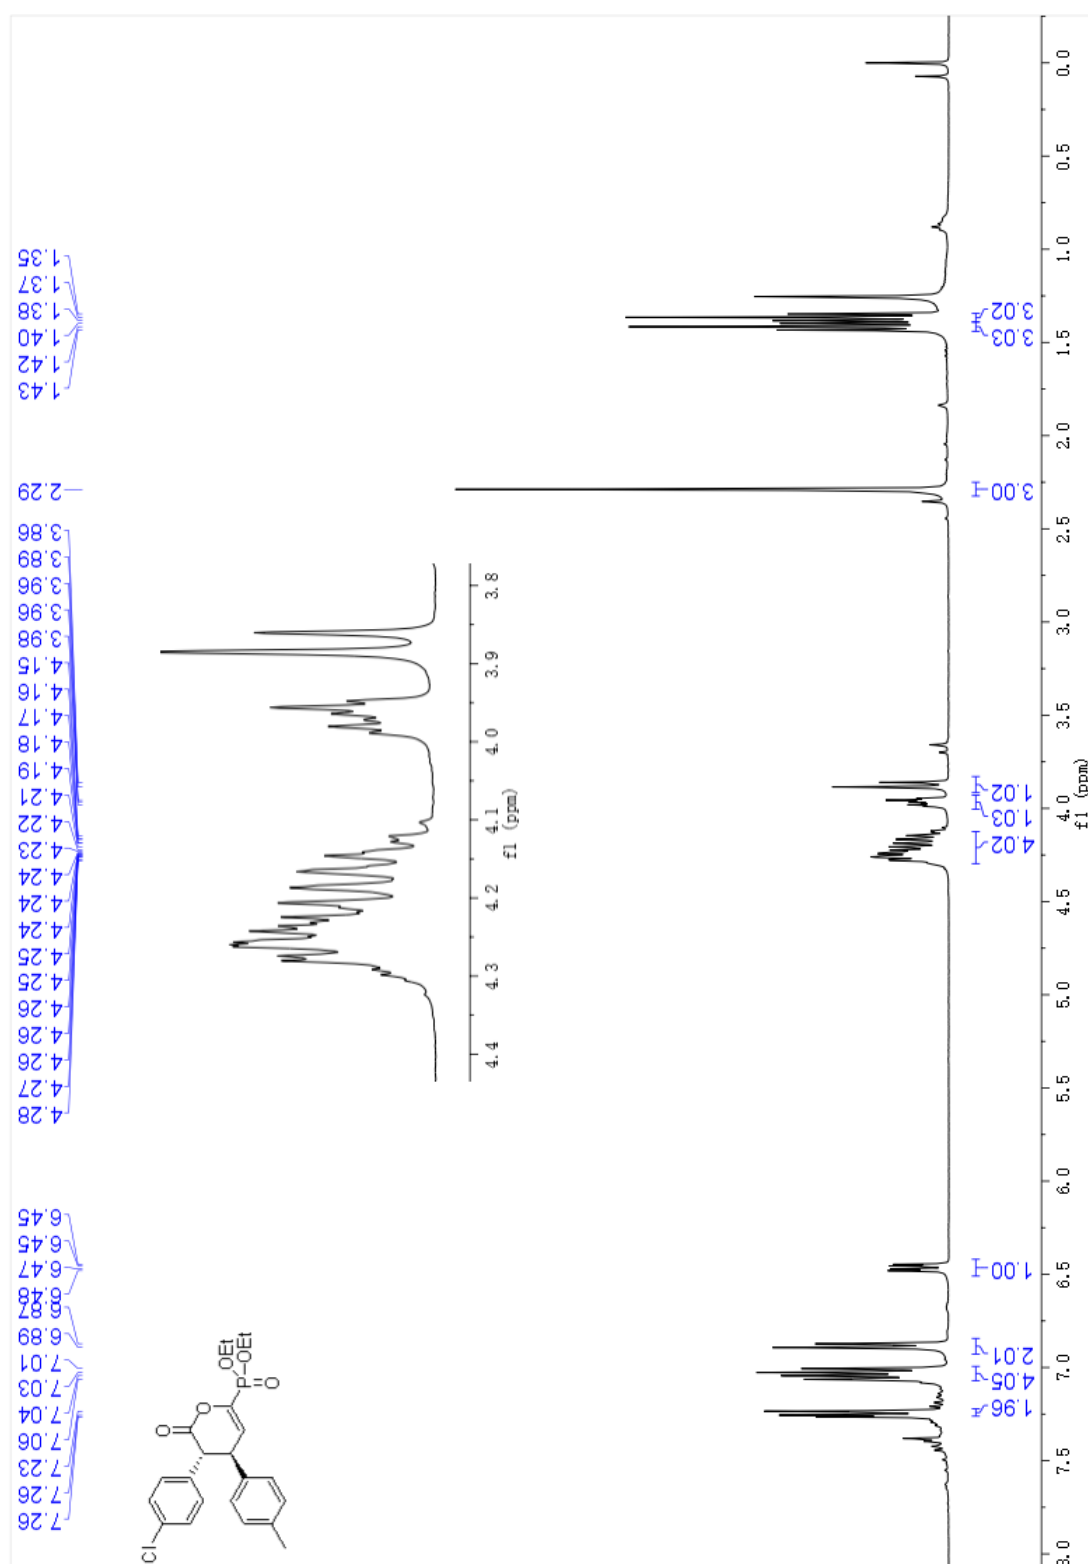

<sup>13</sup>C NMR spectrum of product **3i**

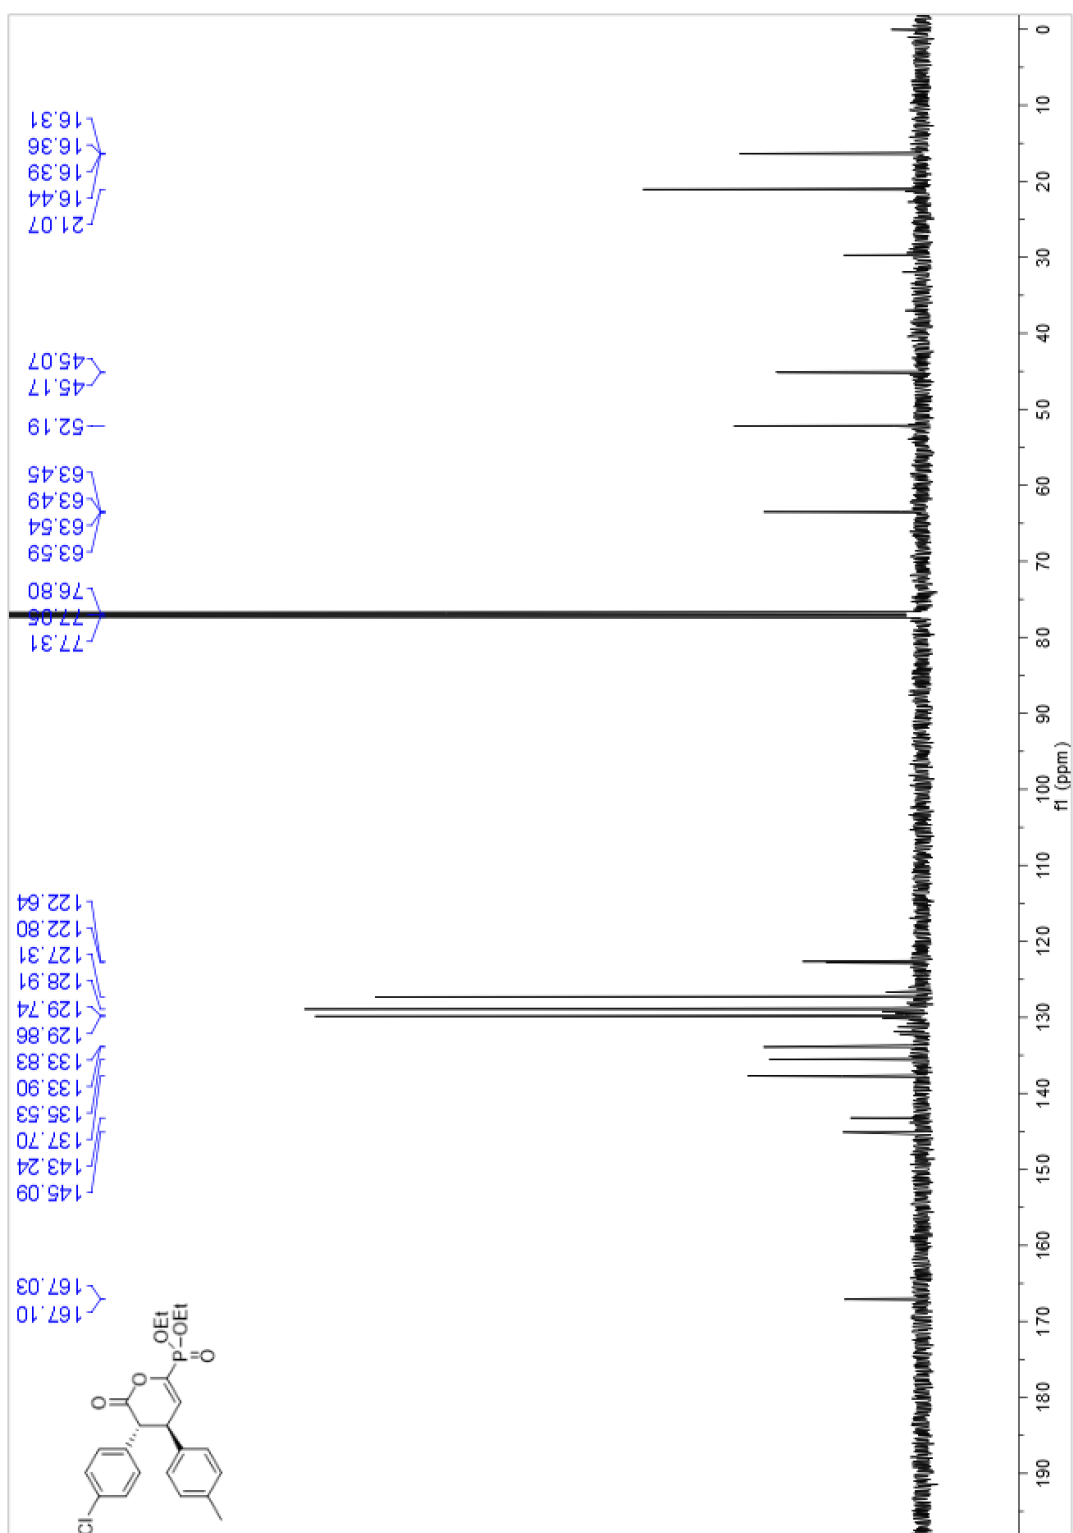



<sup>31</sup>P NMR spectrum of product **3i**

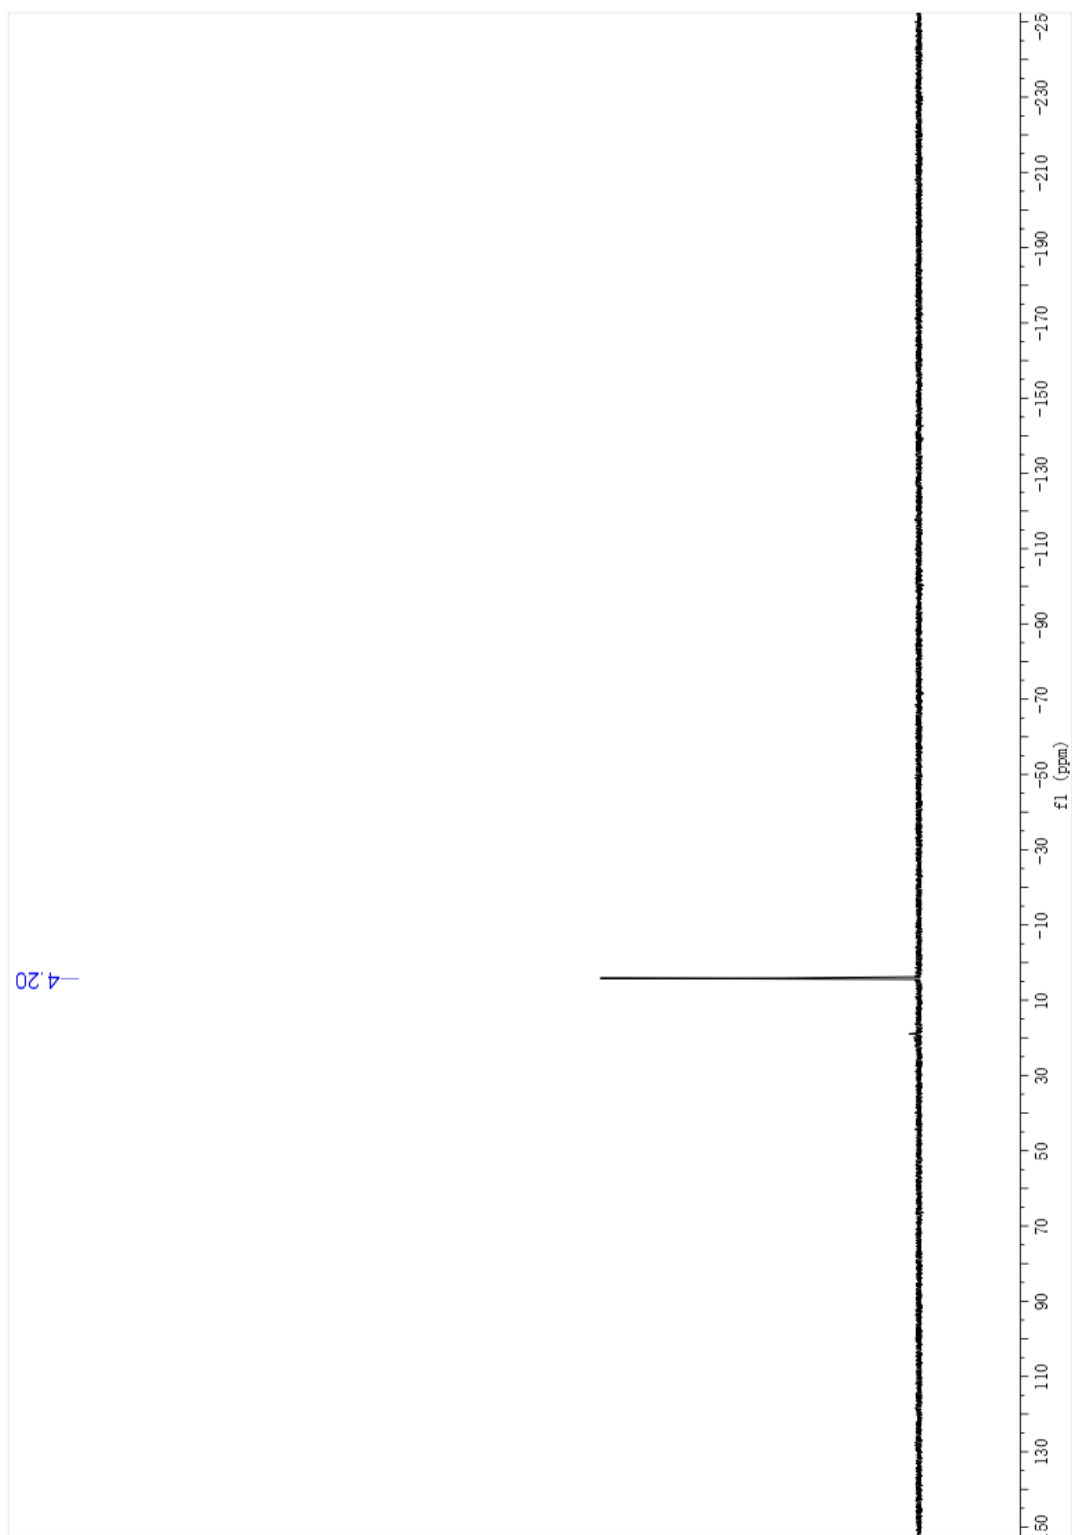

<sup>1</sup>H NMR spectrum of product 3j

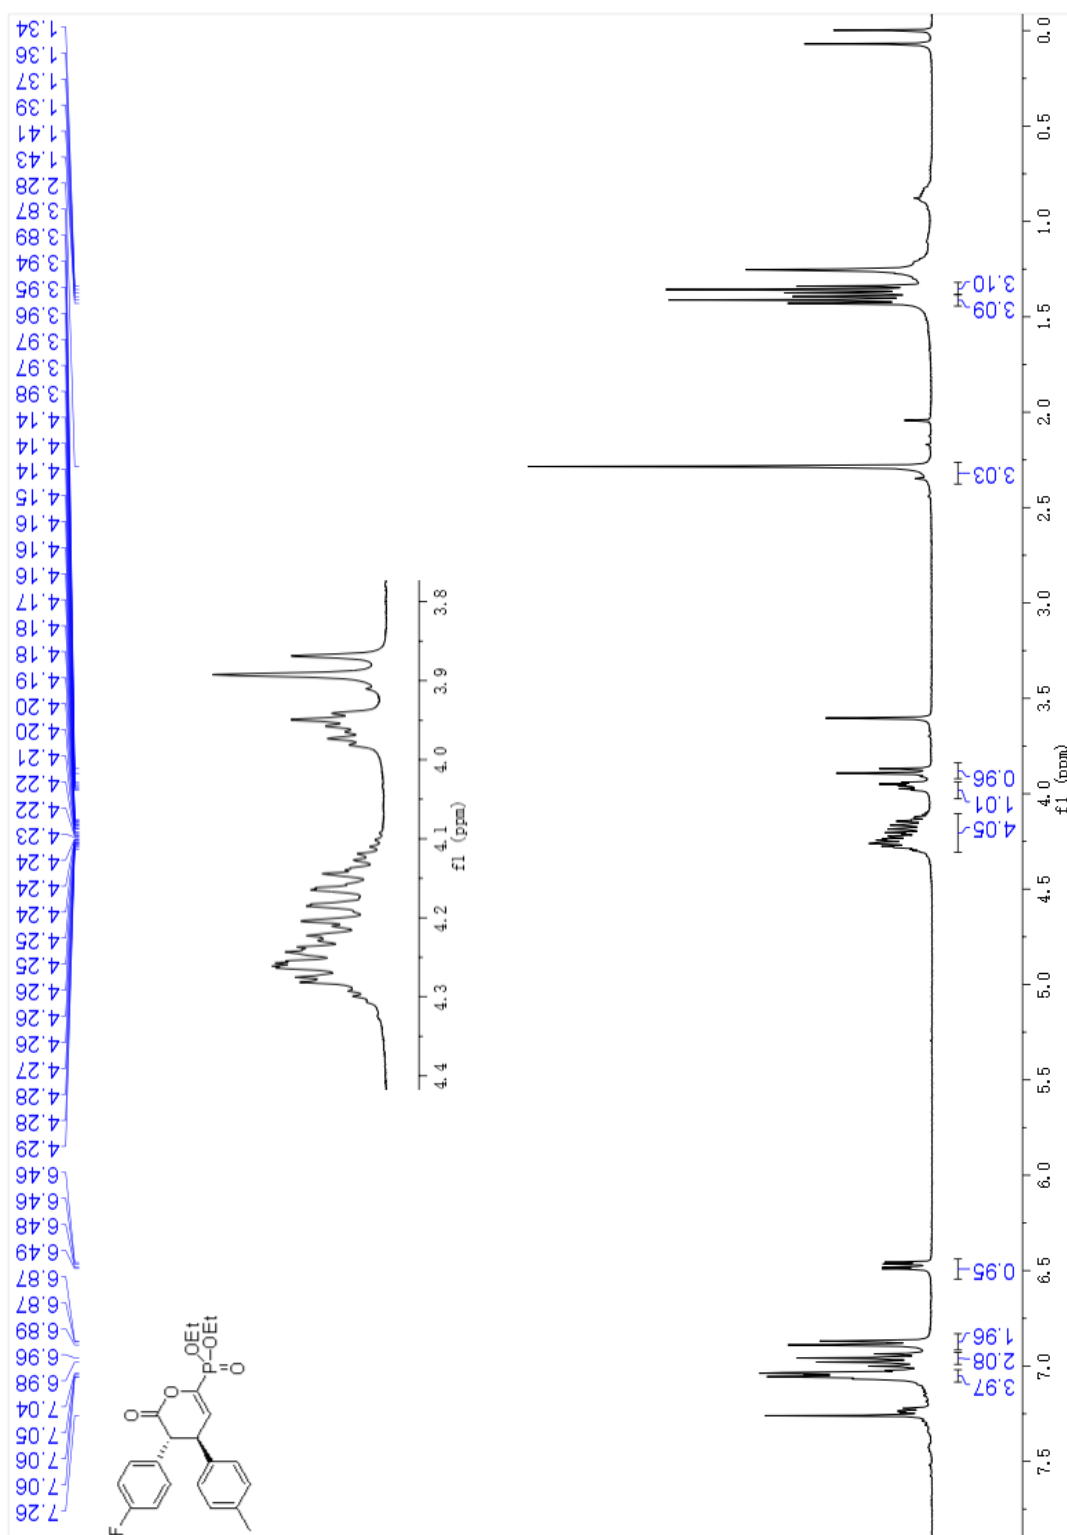

7.26  
7.06  
7.06  
7.06  
7.05  
7.04  
6.98  
6.96  
6.89  
6.87  
6.87  
6.49  
6.48  
6.46  
6.46  
4.29  
4.28  
4.27  
4.26  
4.26  
4.26  
4.25  
4.25  
4.24  
4.24  
4.24  
4.24  
4.23  
4.22  
4.22  
4.21  
4.20  
4.20  
4.19  
4.18  
4.18  
4.17  
4.16  
4.16  
4.16  
4.15  
4.14  
4.14  
4.14  
3.97  
3.97  
3.96  
3.95  
3.94  
3.89  
3.87  
2.28  
1.43  
1.41  
1.39  
1.37  
1.36  
1.34

3.97  
2.08  
1.96  
0.95  
4.05  
1.01  
0.96  
3.03  
3.09  
3.10

<sup>13</sup>C NMR spectrum of product **3j**

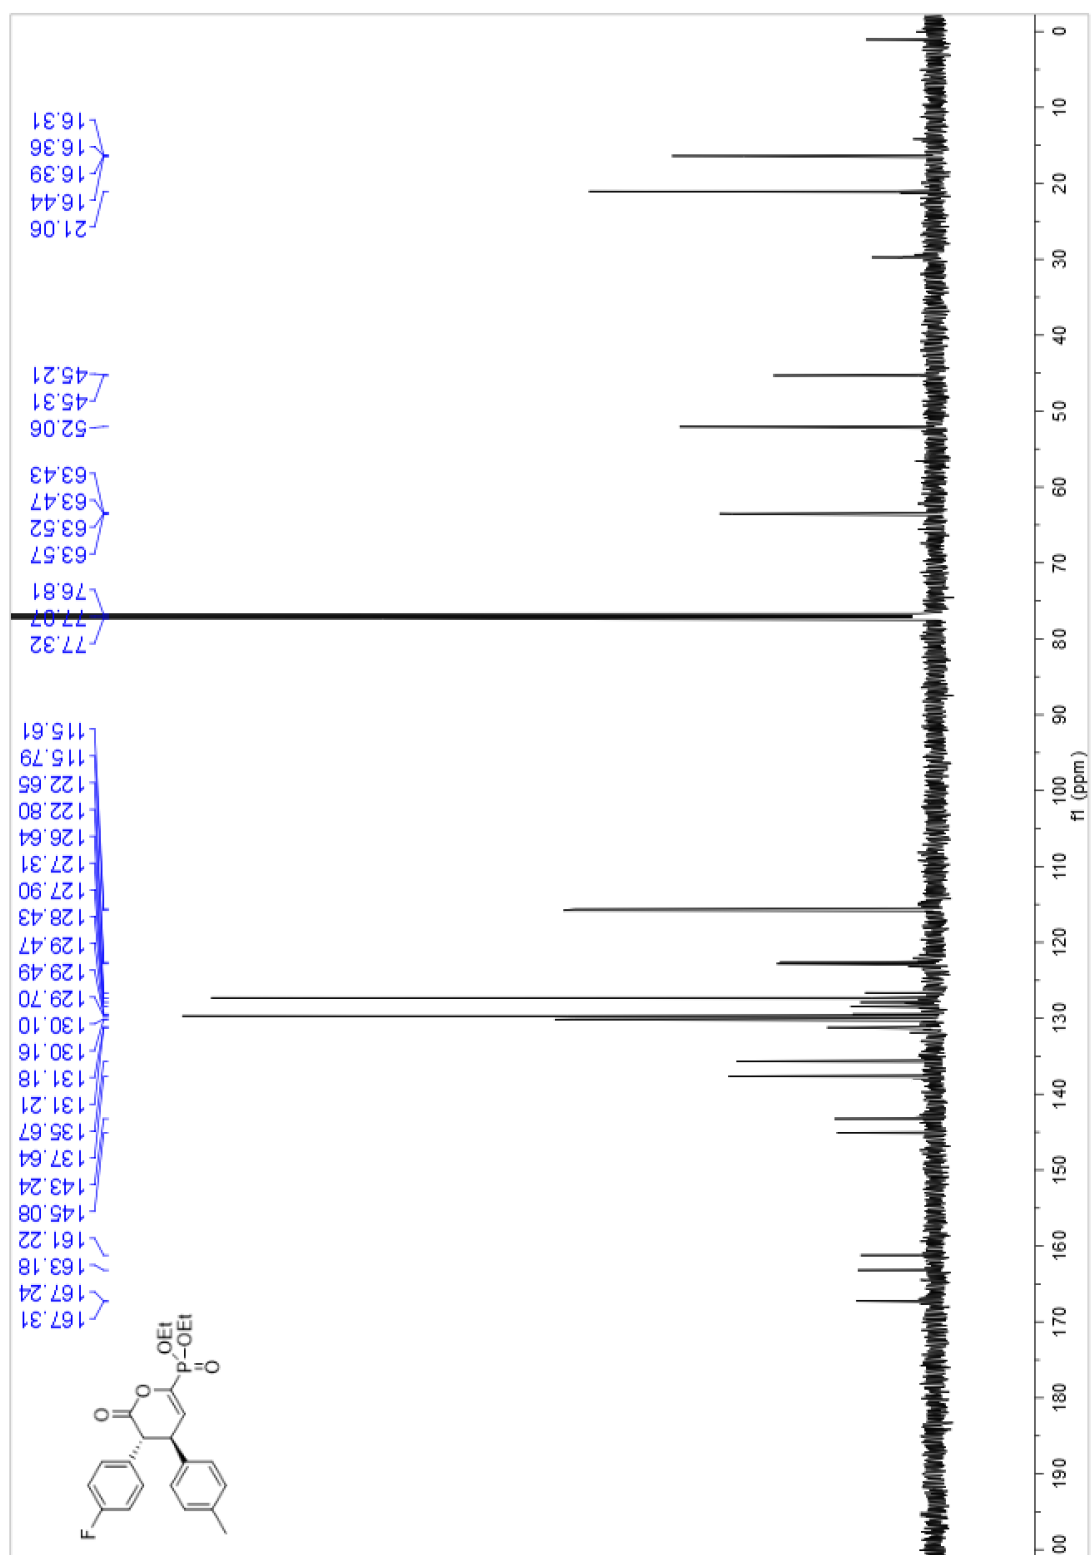

<sup>31</sup>P NMR spectrum of product **3j**

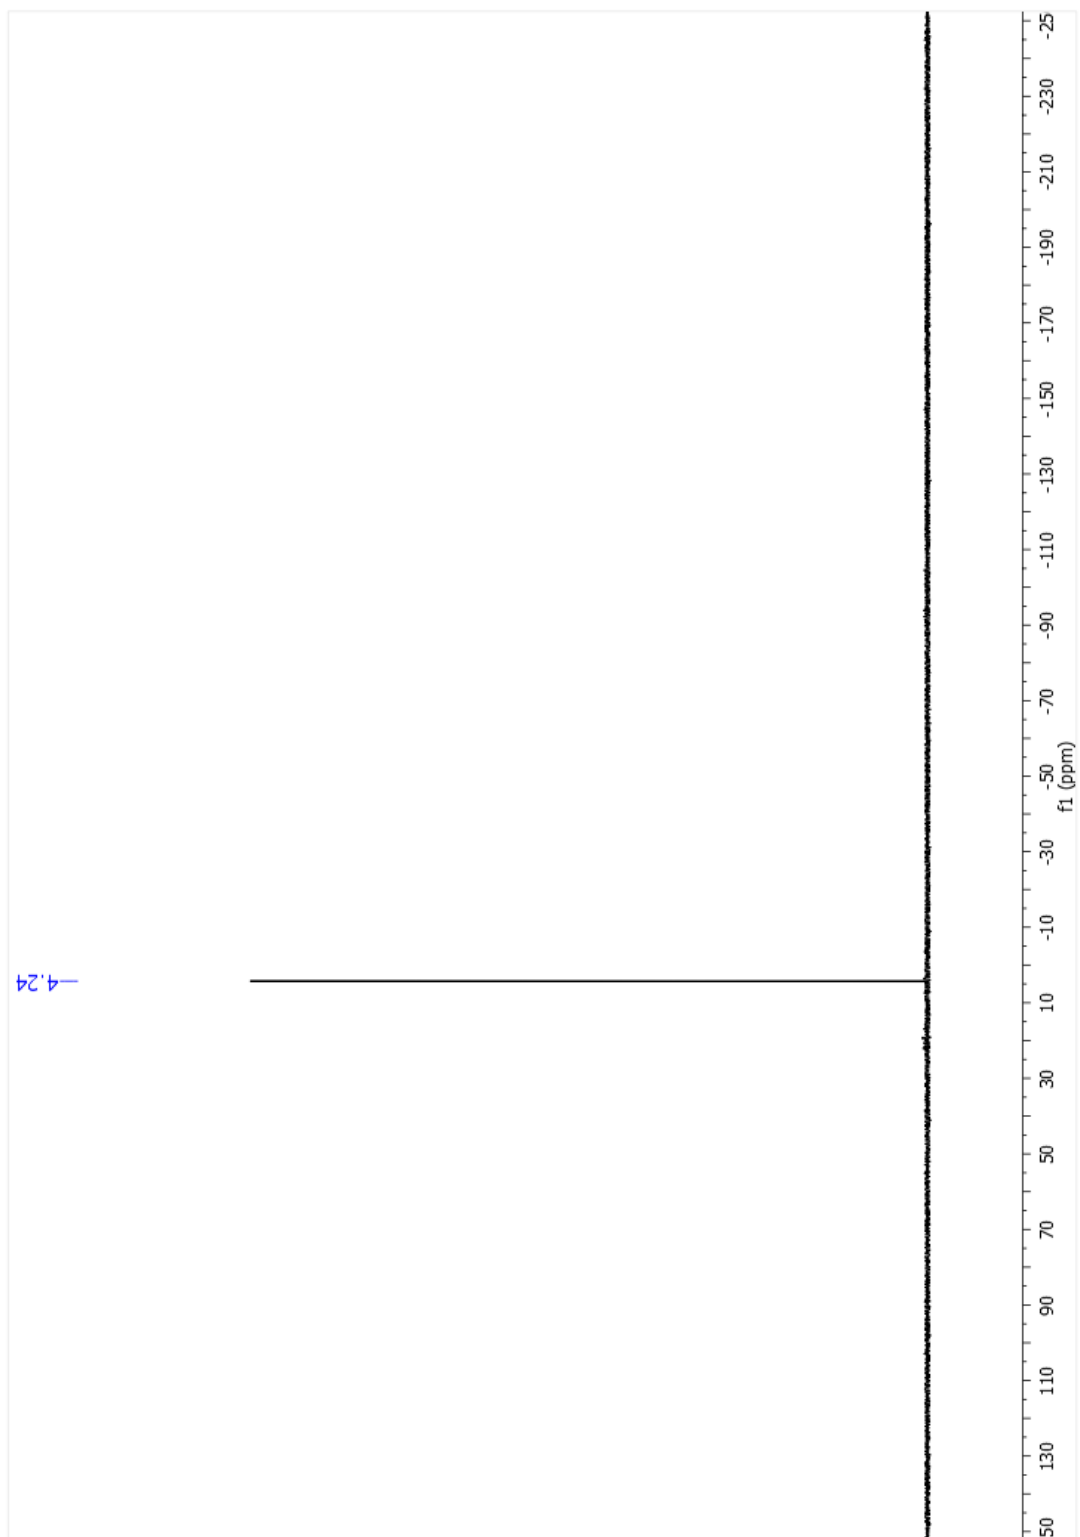

<sup>19</sup>F NMR spectrum of product **3j**

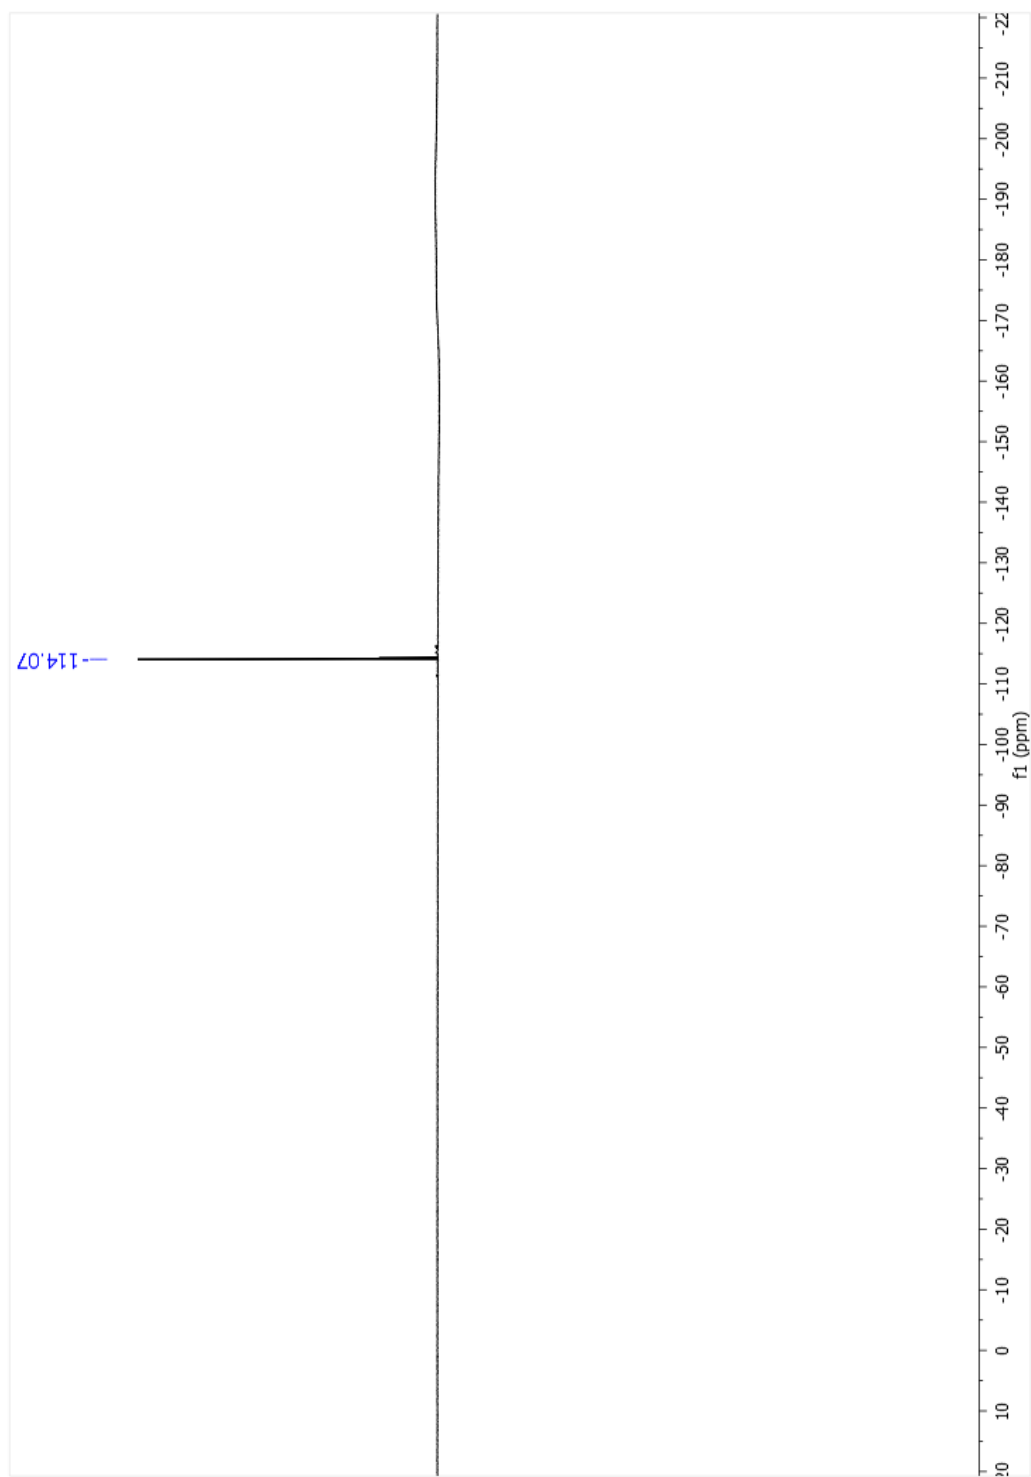

<sup>1</sup>H NMR spectrum of product 3k

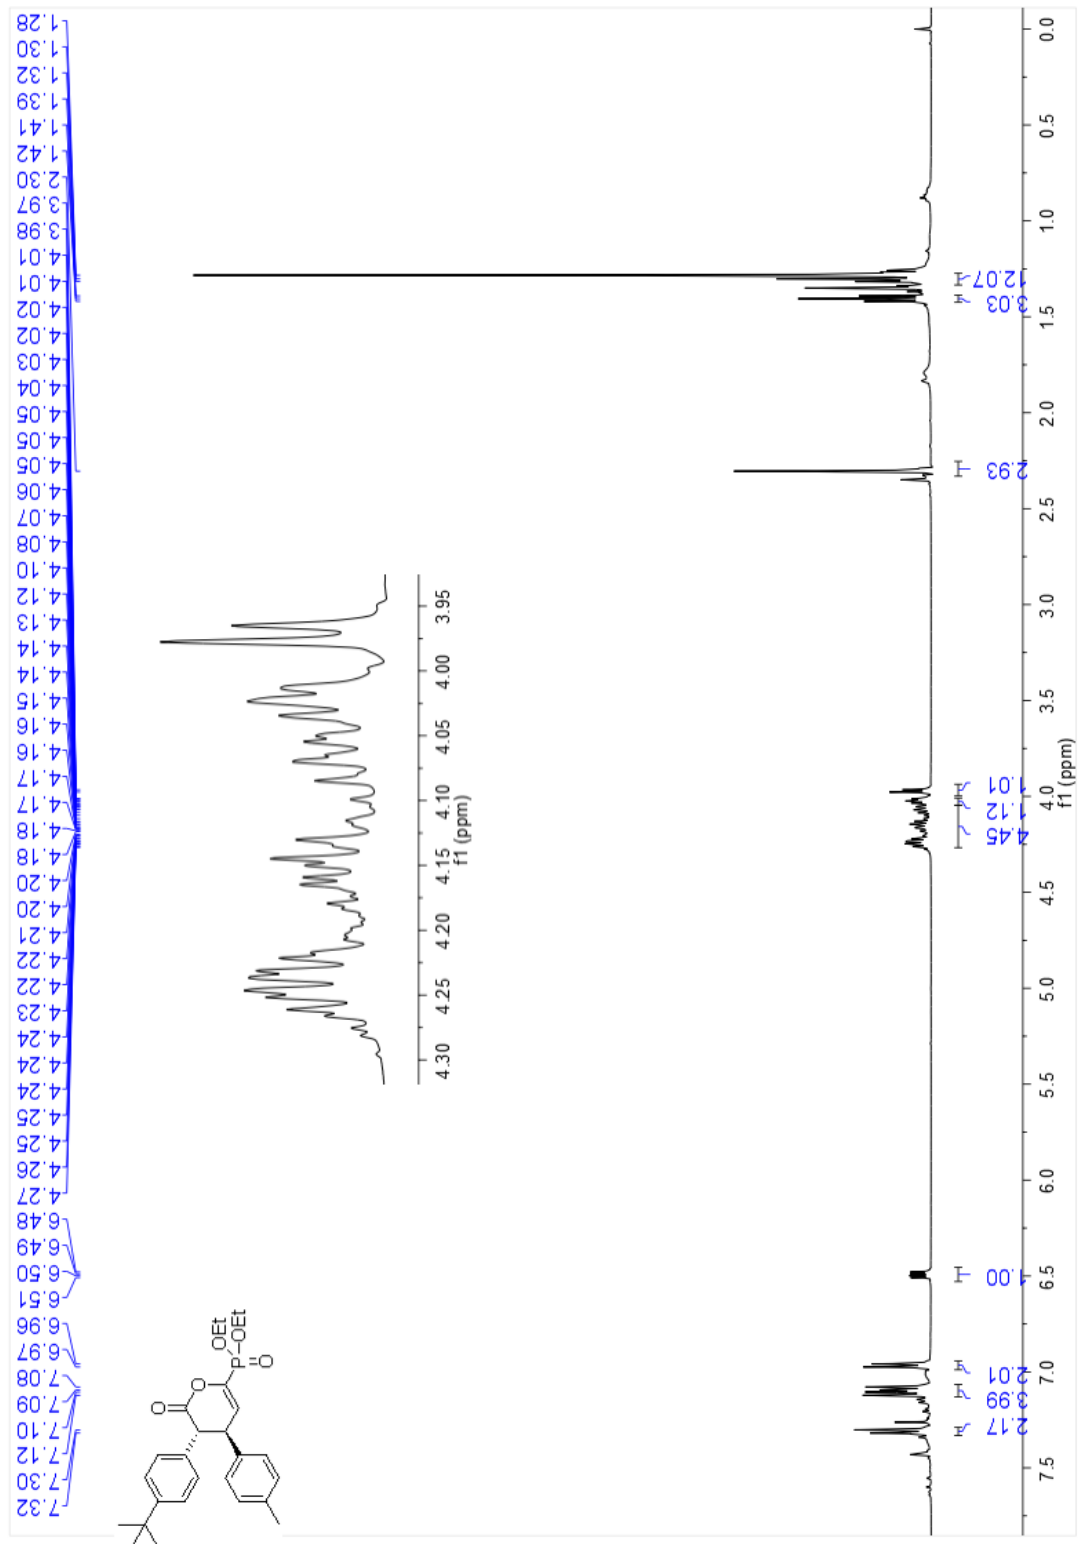

<sup>13</sup>C NMR spectrum of product **3k**

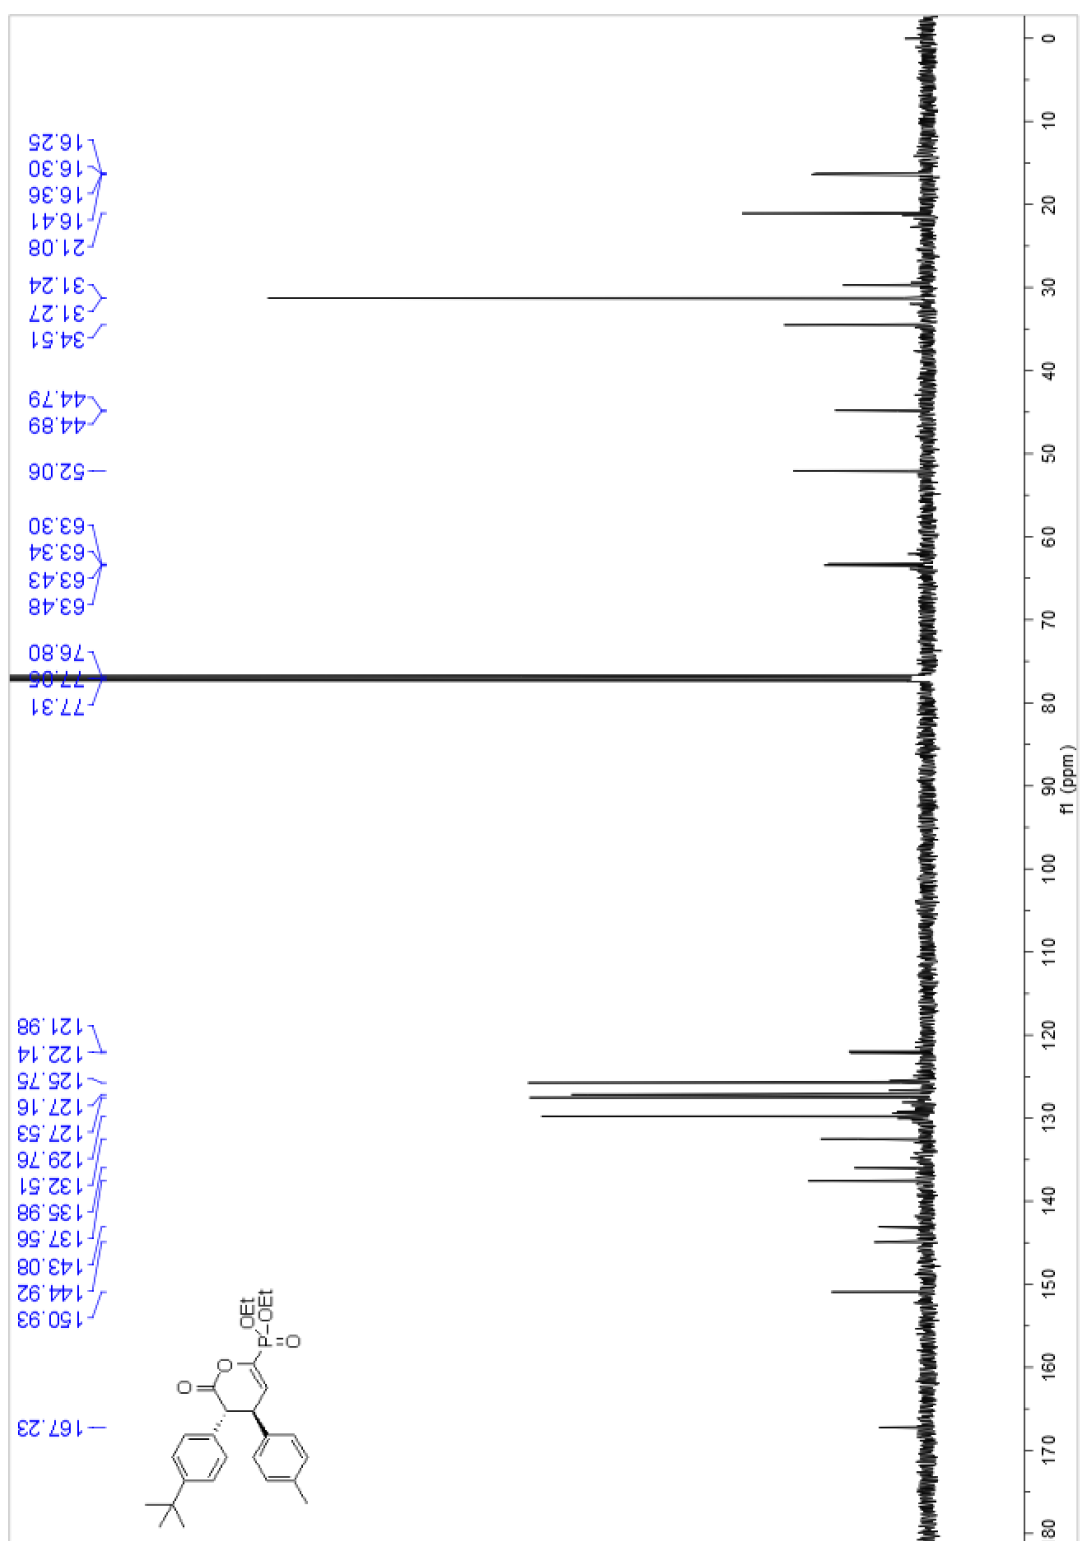

$^{31}\text{P}$  NMR spectrum of product **3k**

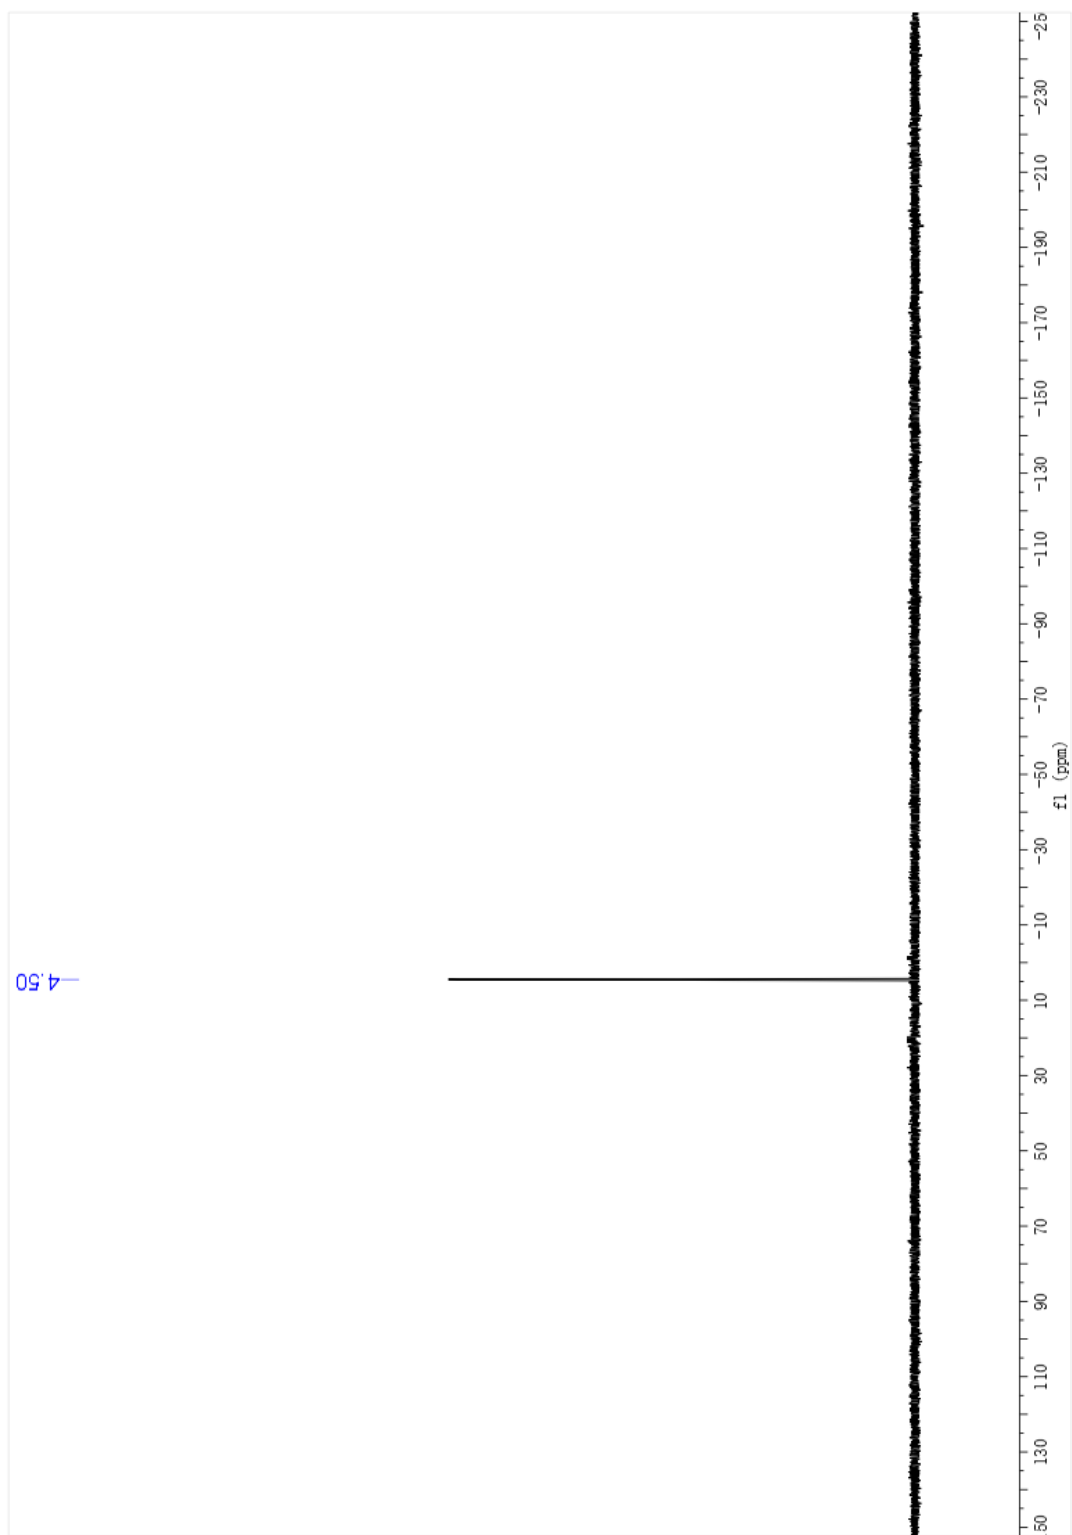



<sup>1</sup>H NMR spectrum of product 31

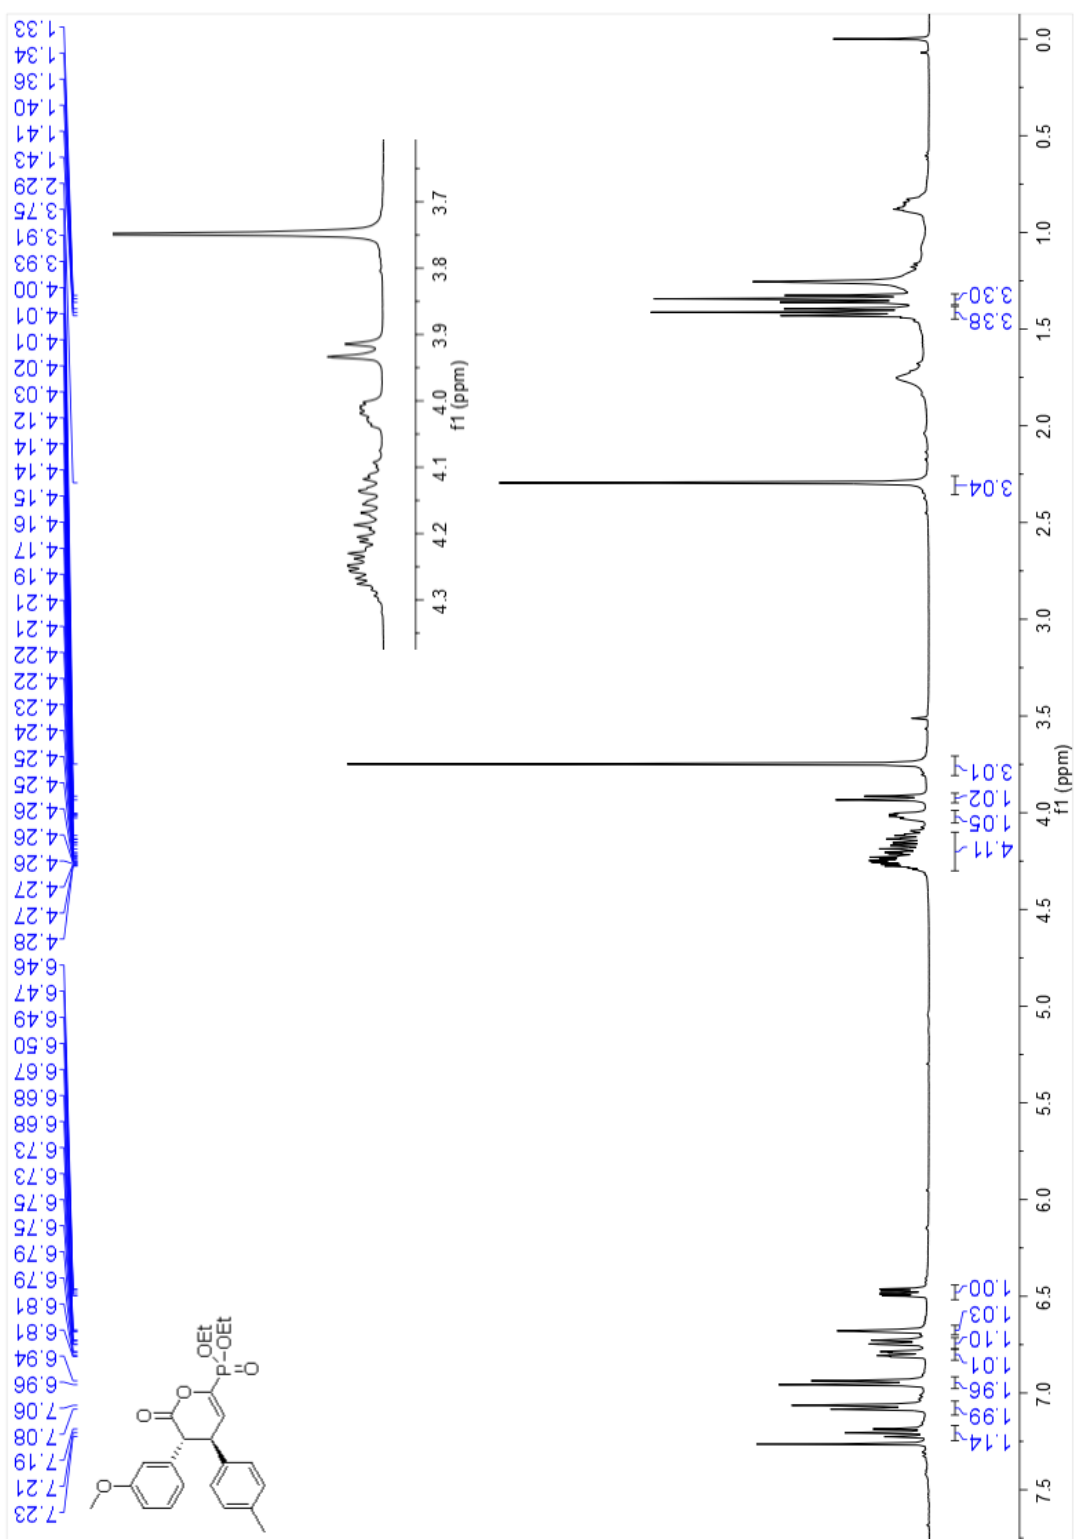

<sup>13</sup>C NMR spectrum of product 31

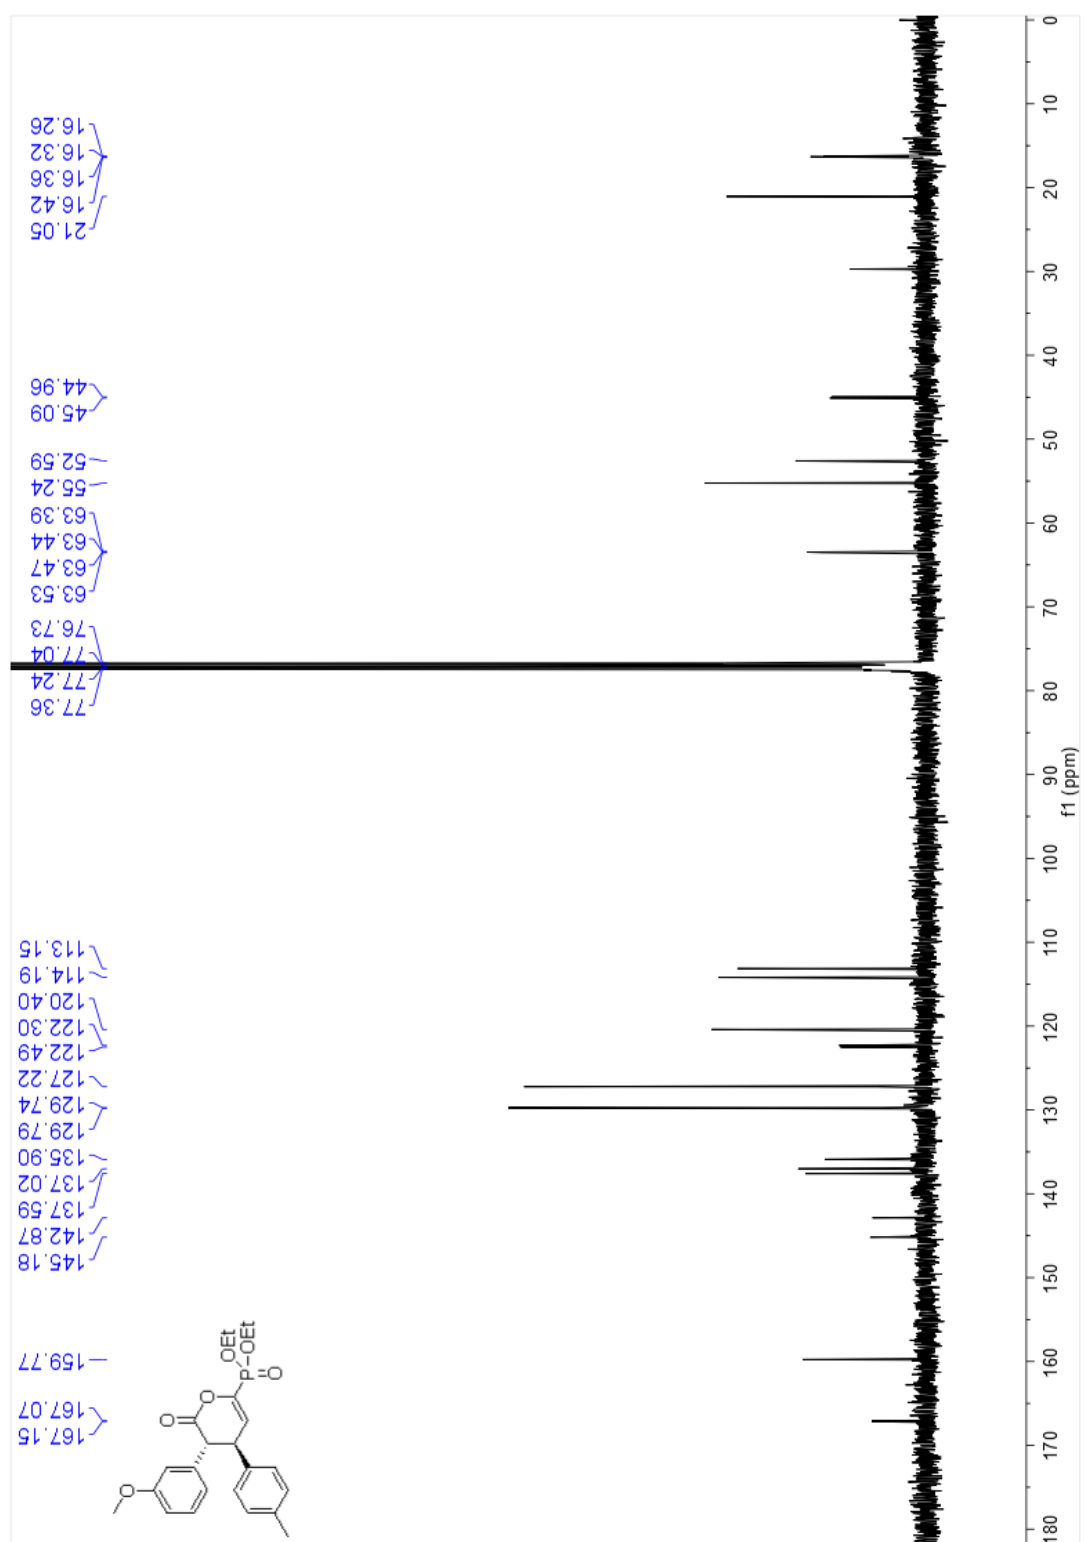

<sup>31</sup>P NMR spectrum of product **31**

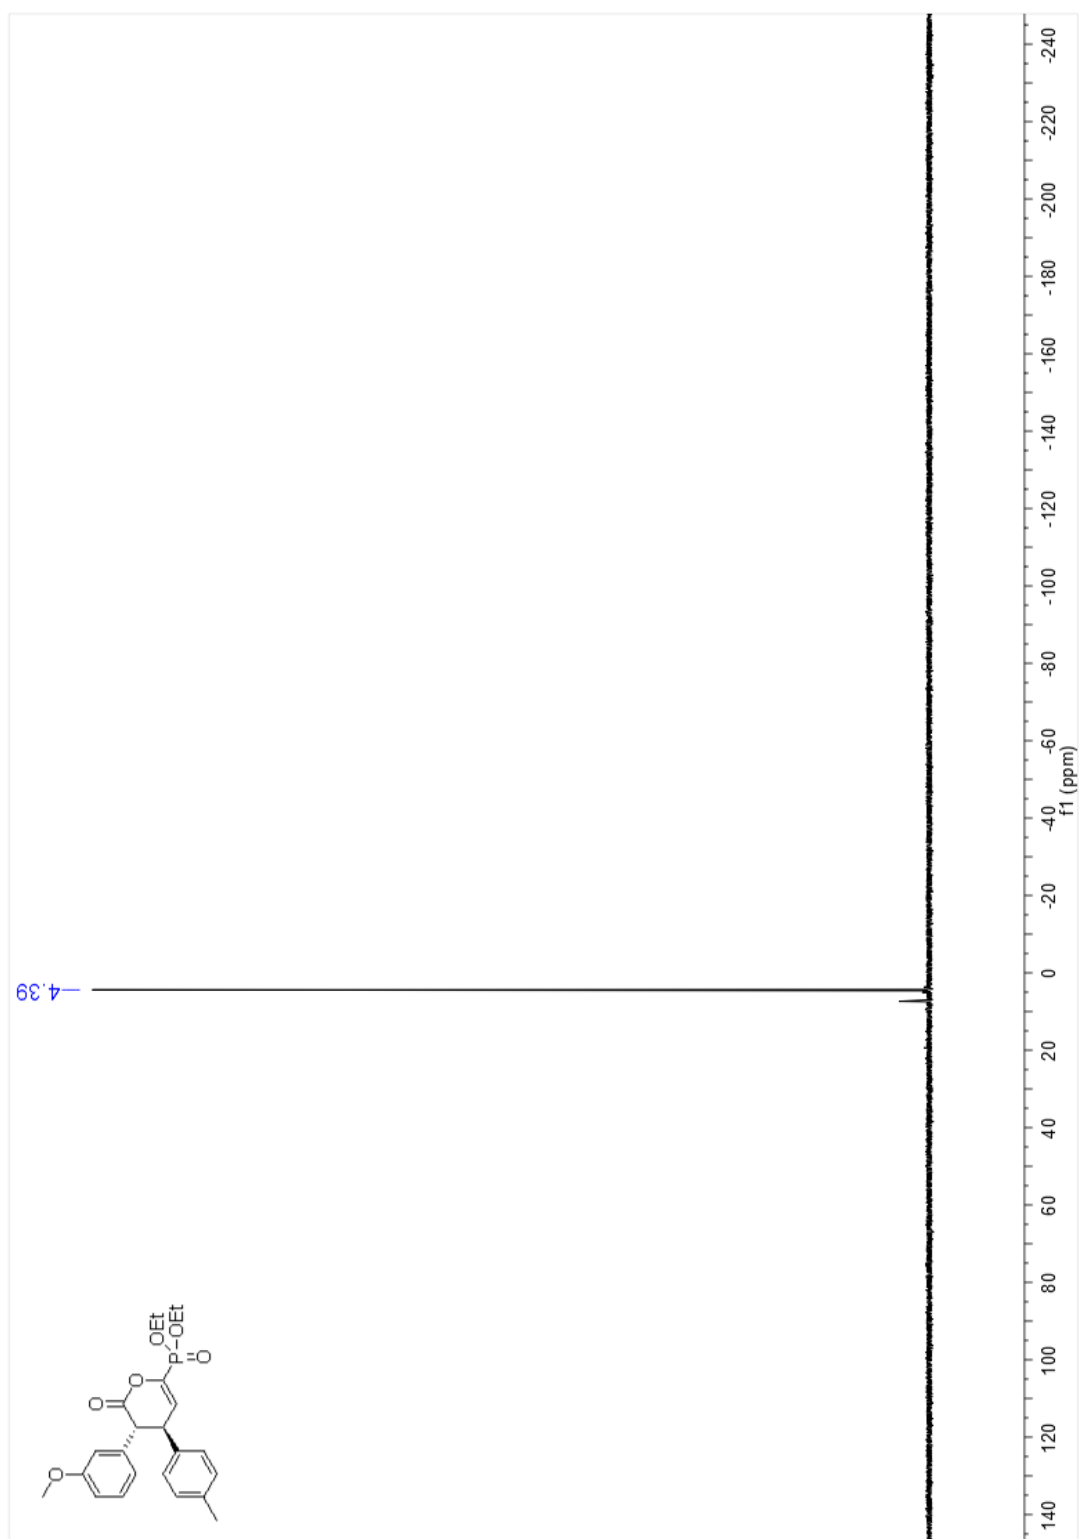

<sup>1</sup>H NMR spectrum of product 3m

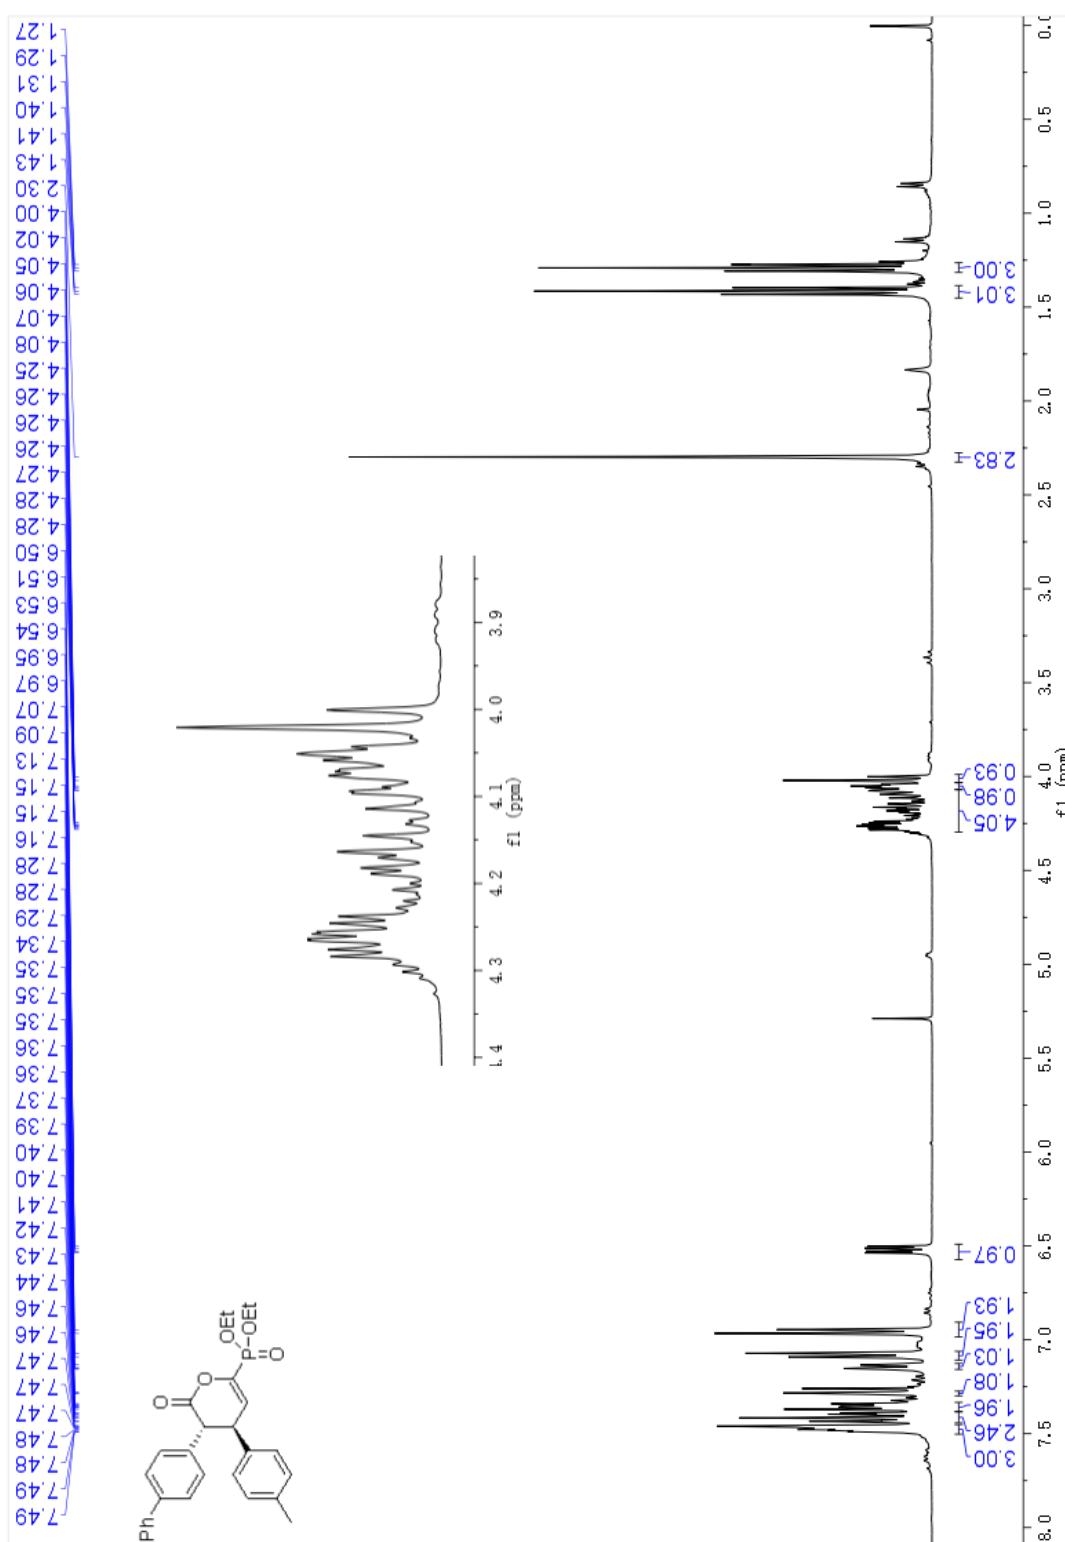

<sup>13</sup>C NMR spectrum of product **3m**

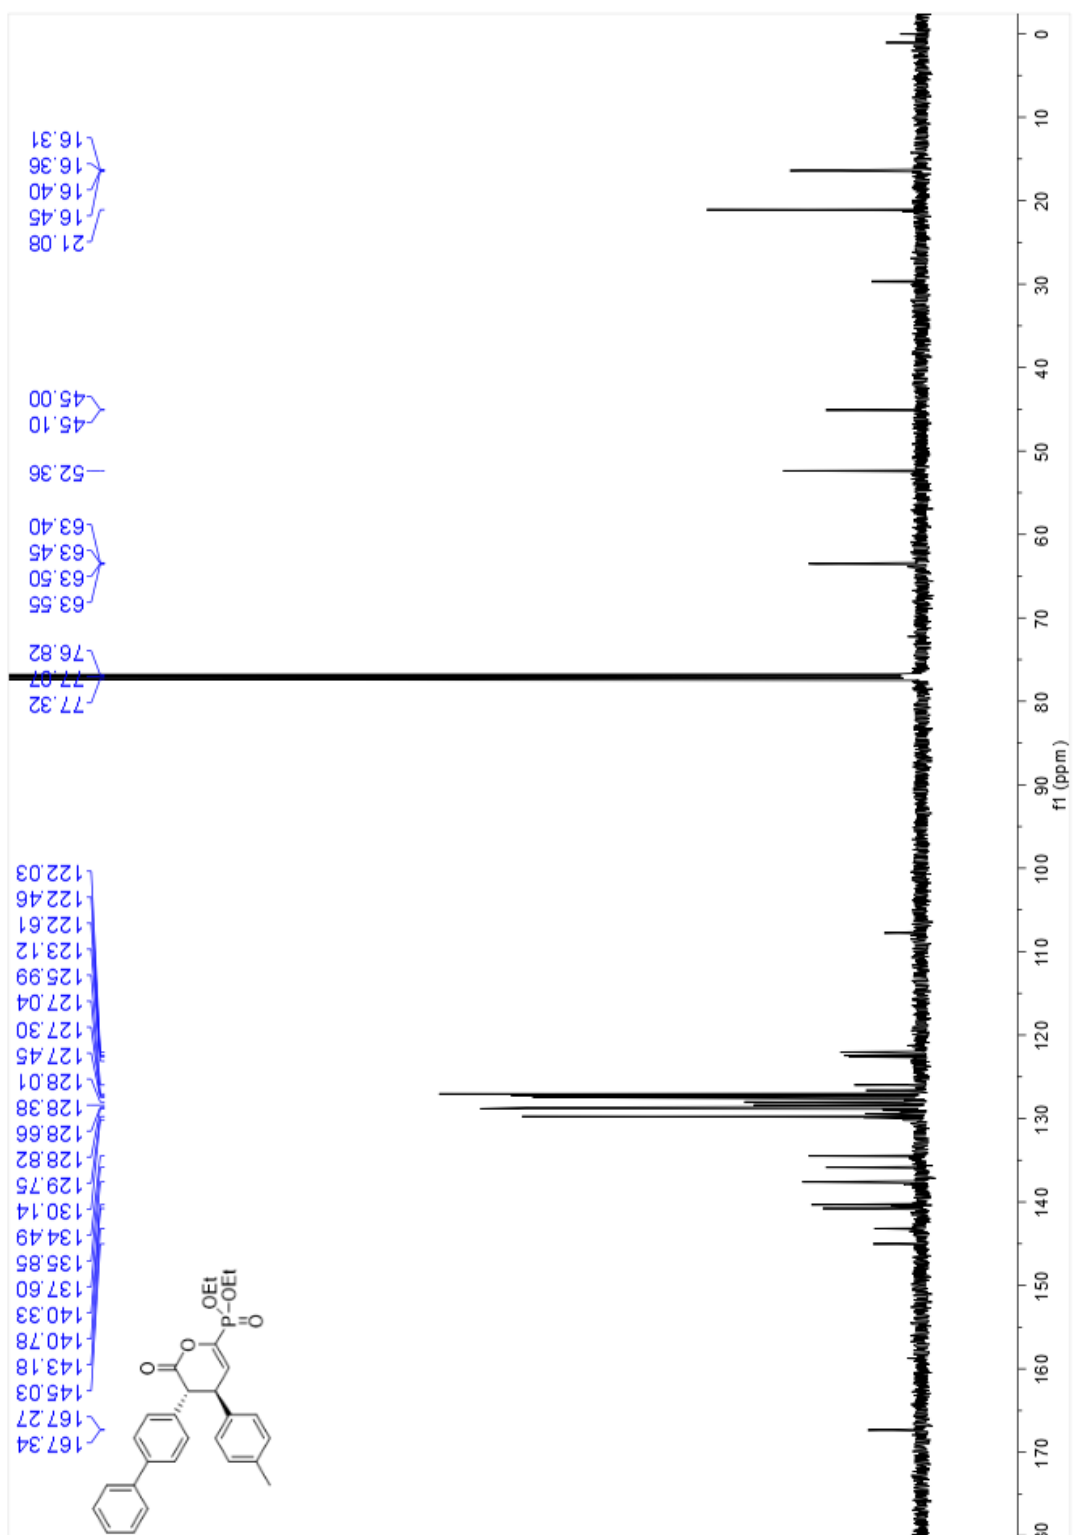

$^{31}\text{P}$  NMR spectrum of product **3m**

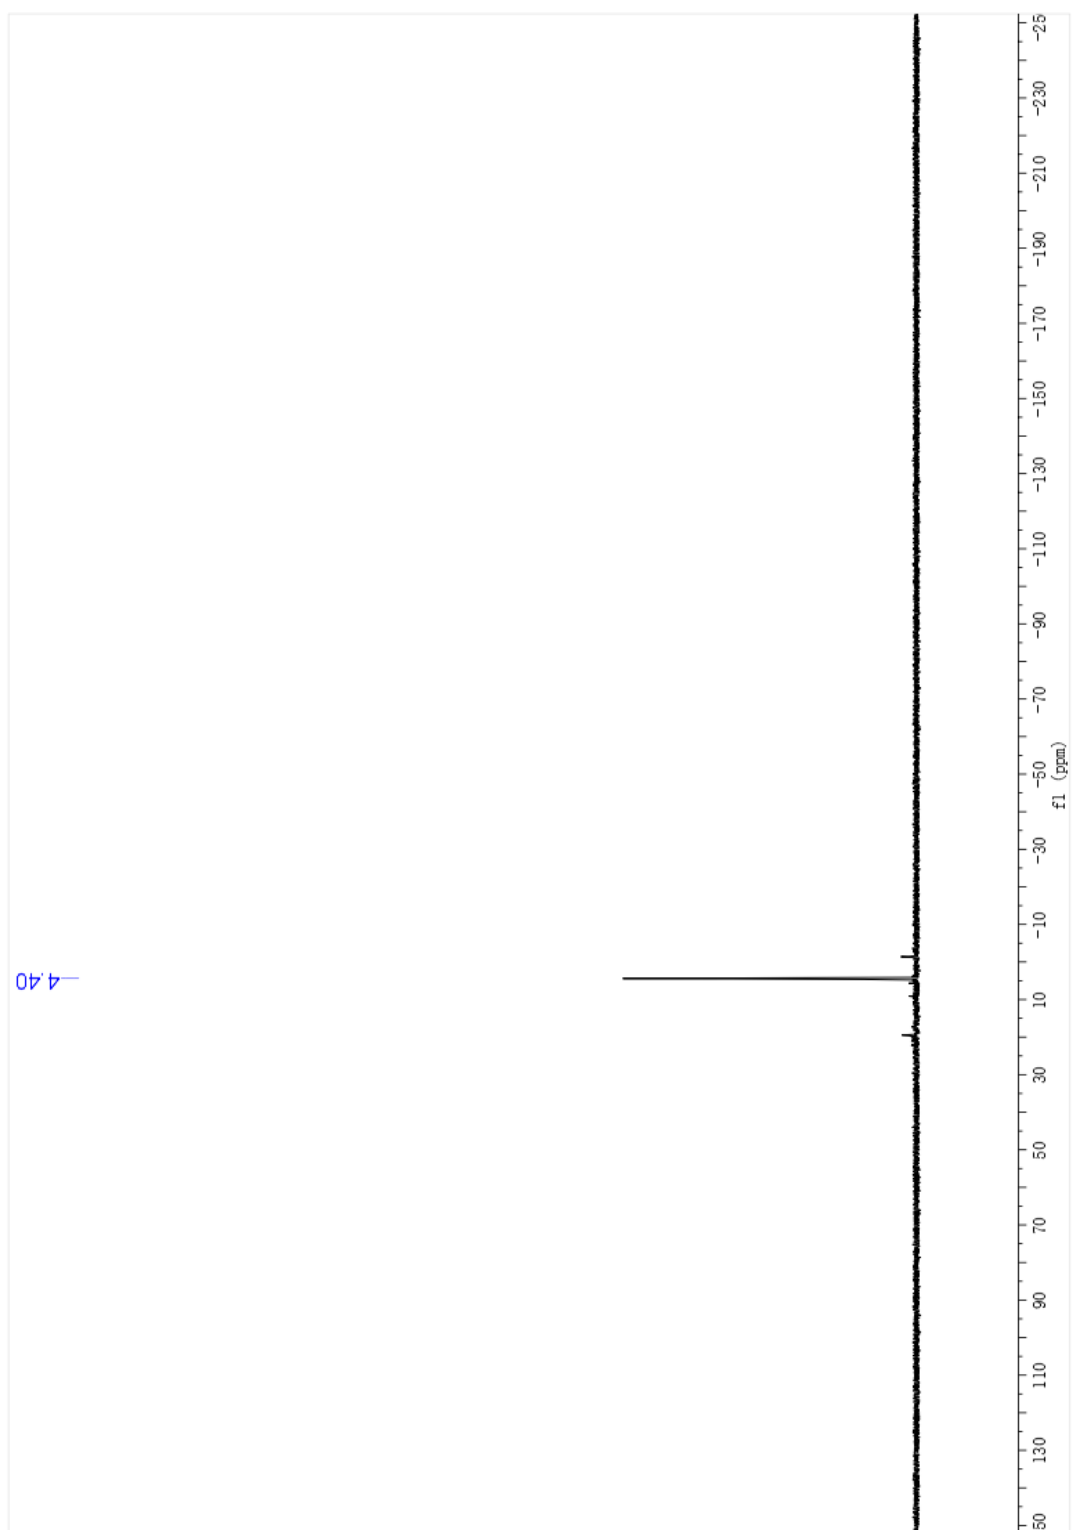

<sup>1</sup>H NMR spectrum of product 3n

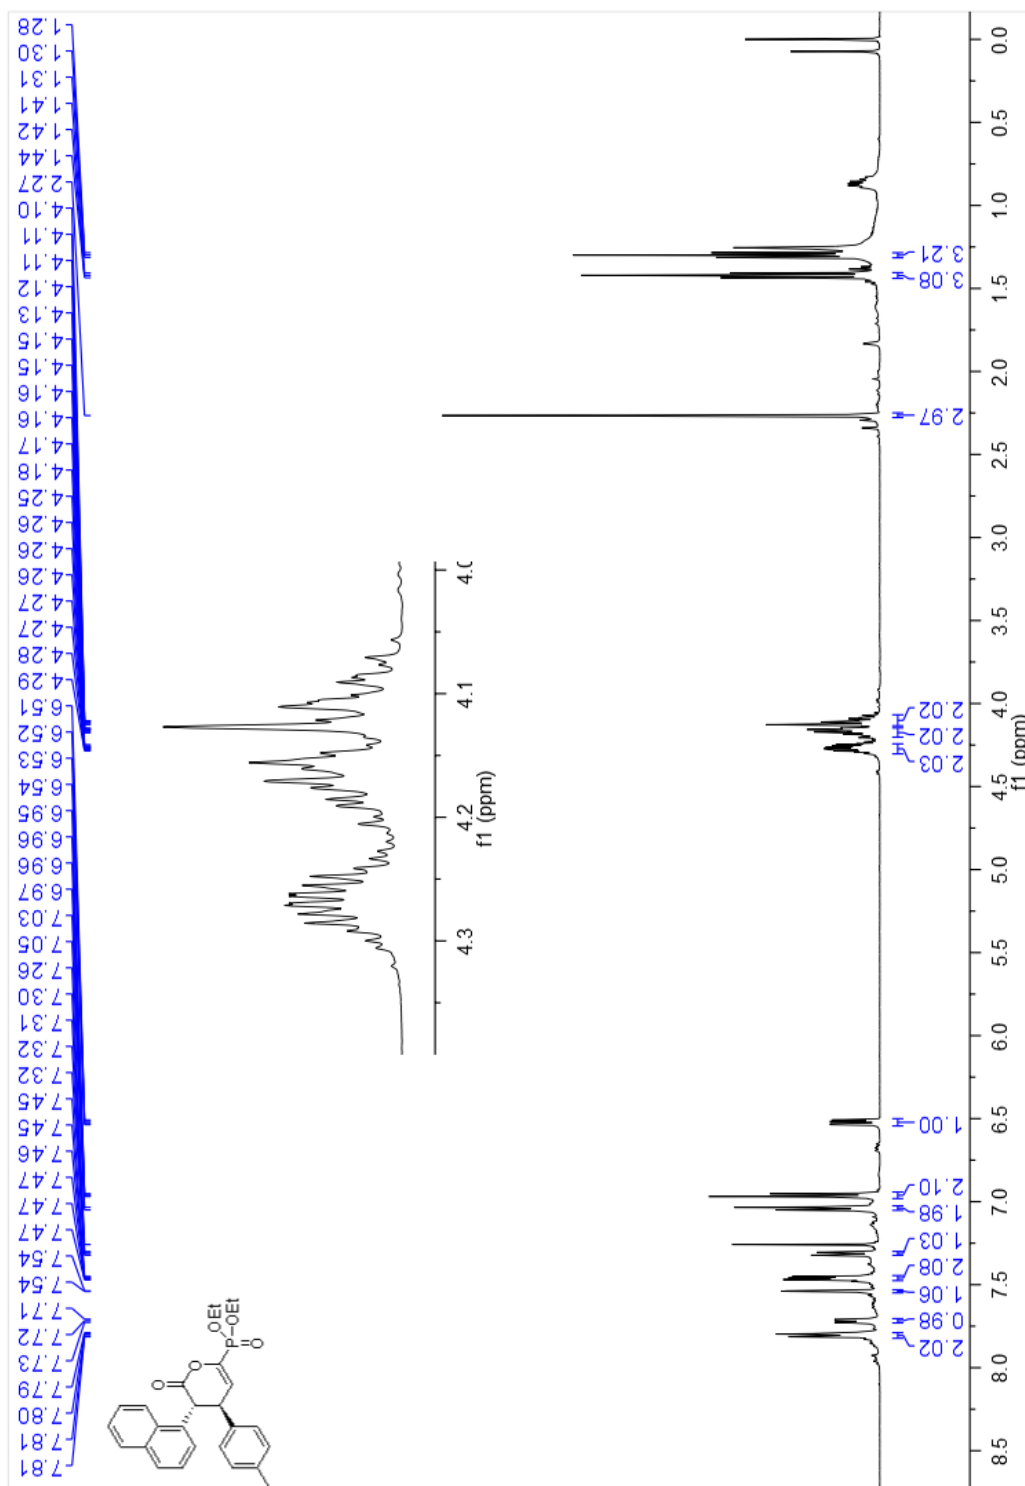

<sup>13</sup>C NMR spectrum of product **3n**

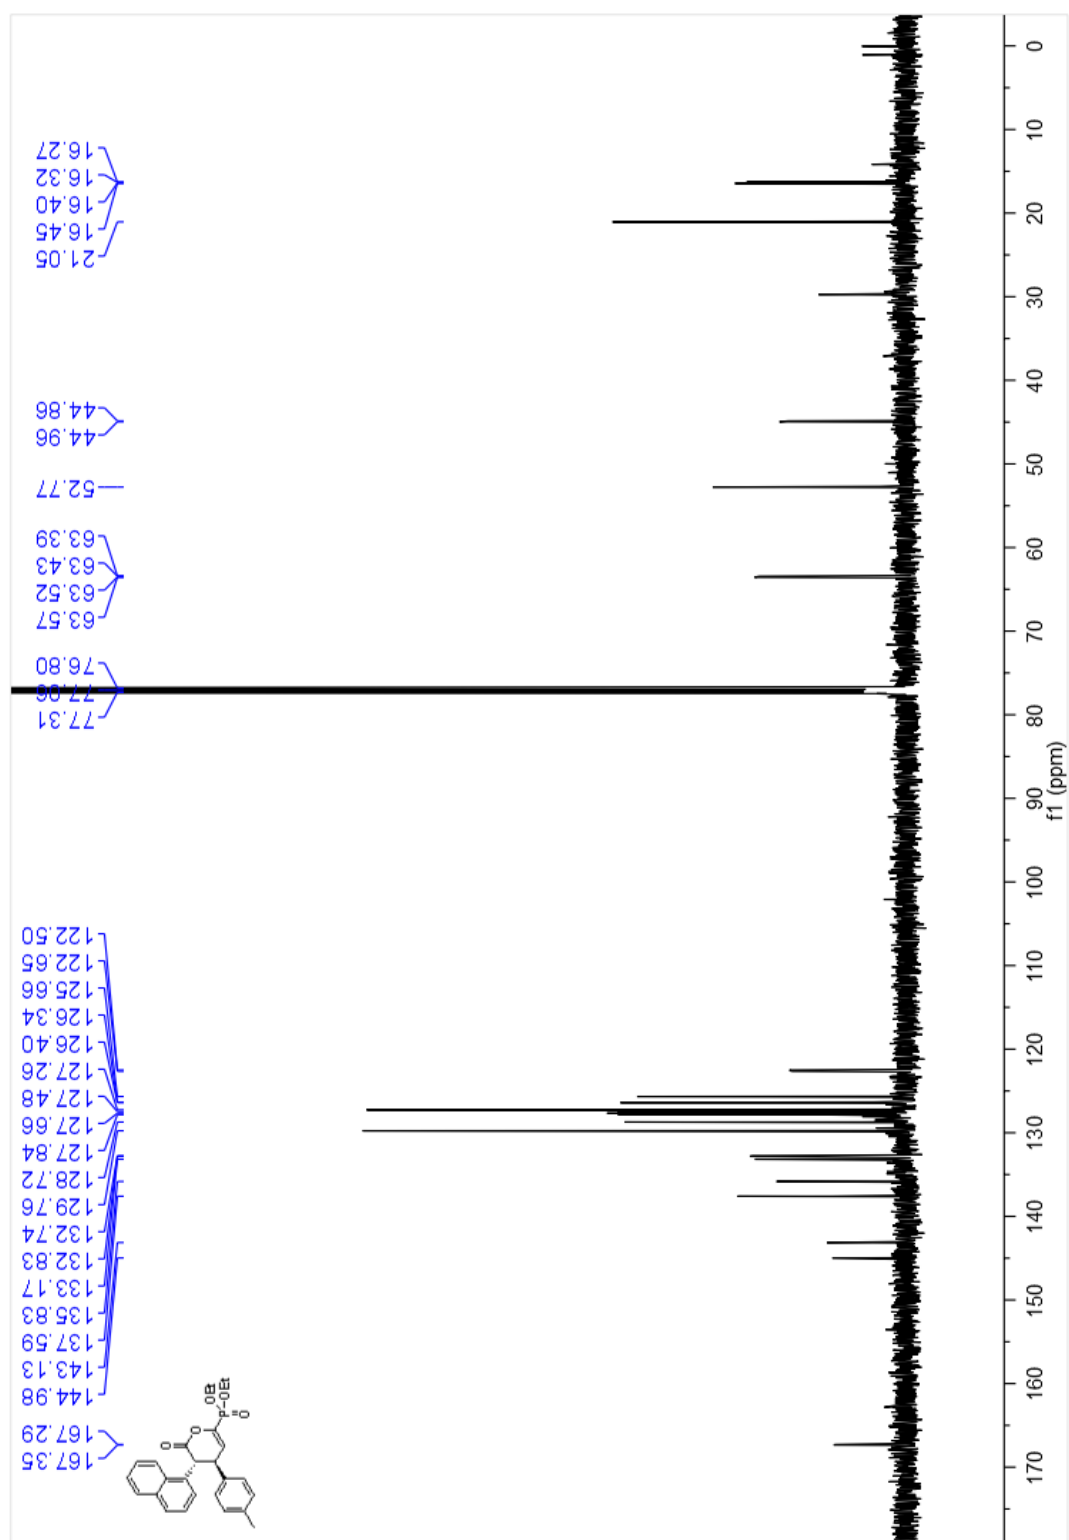



<sup>31</sup>P NMR spectrum of product **3n**

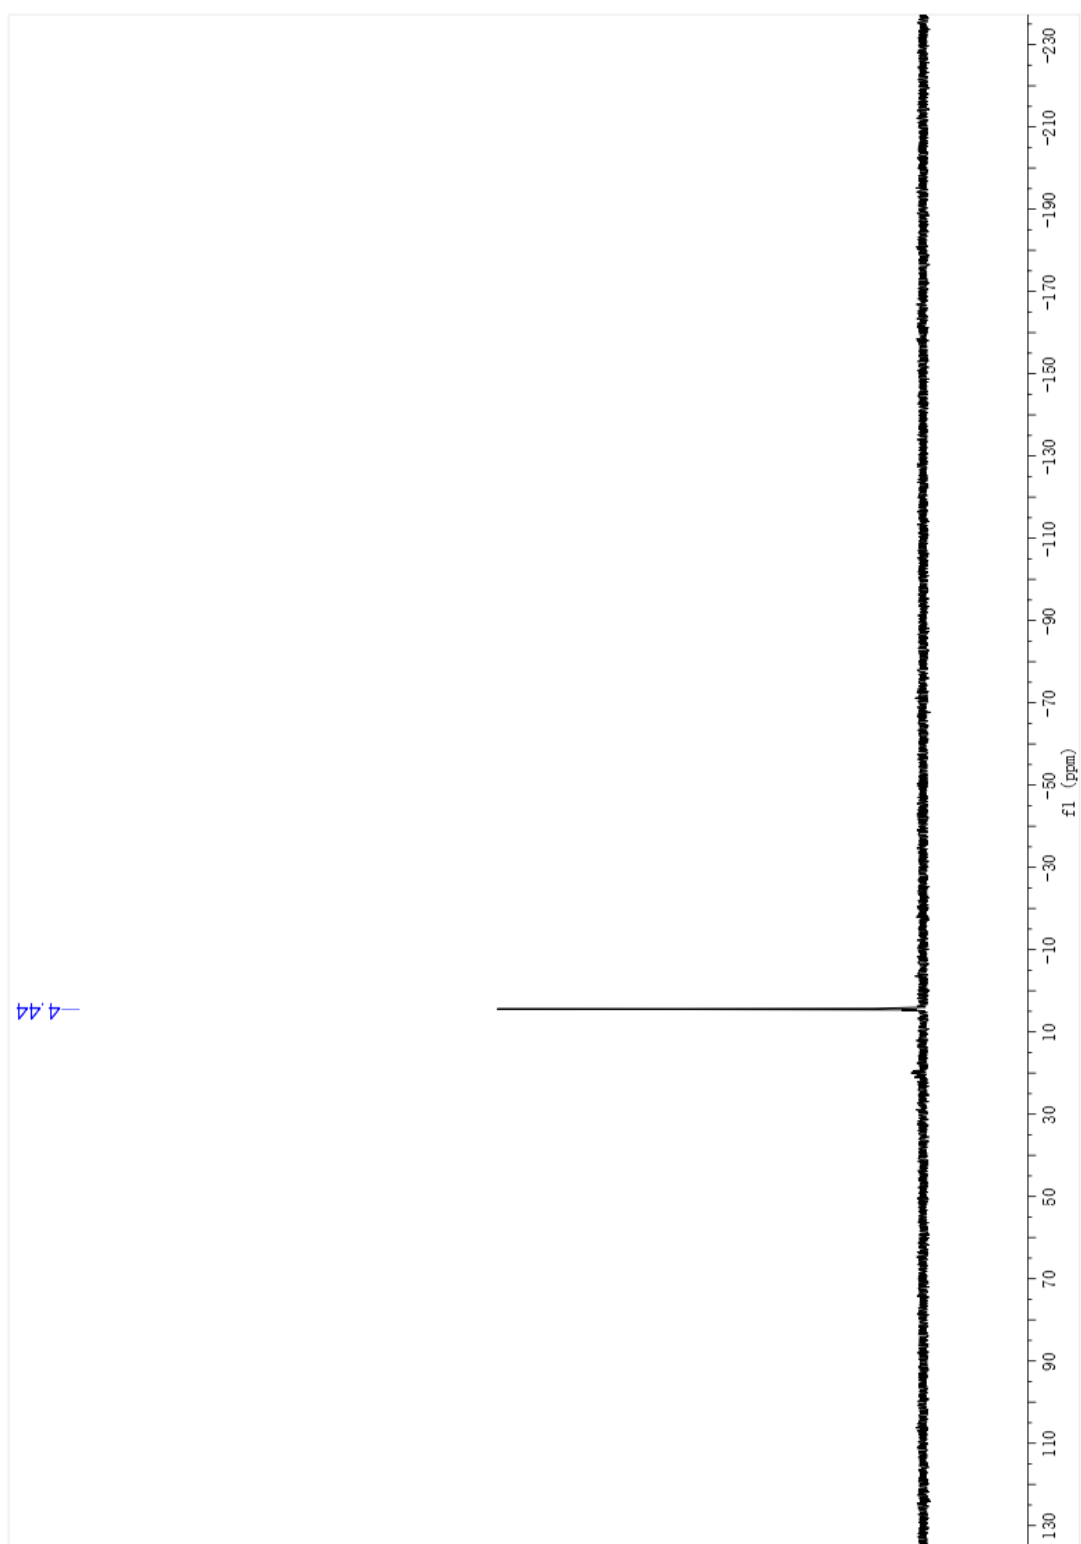

# NMR Spectra of products 5a-5h

<sup>1</sup>H NMR spectrum of product 4a

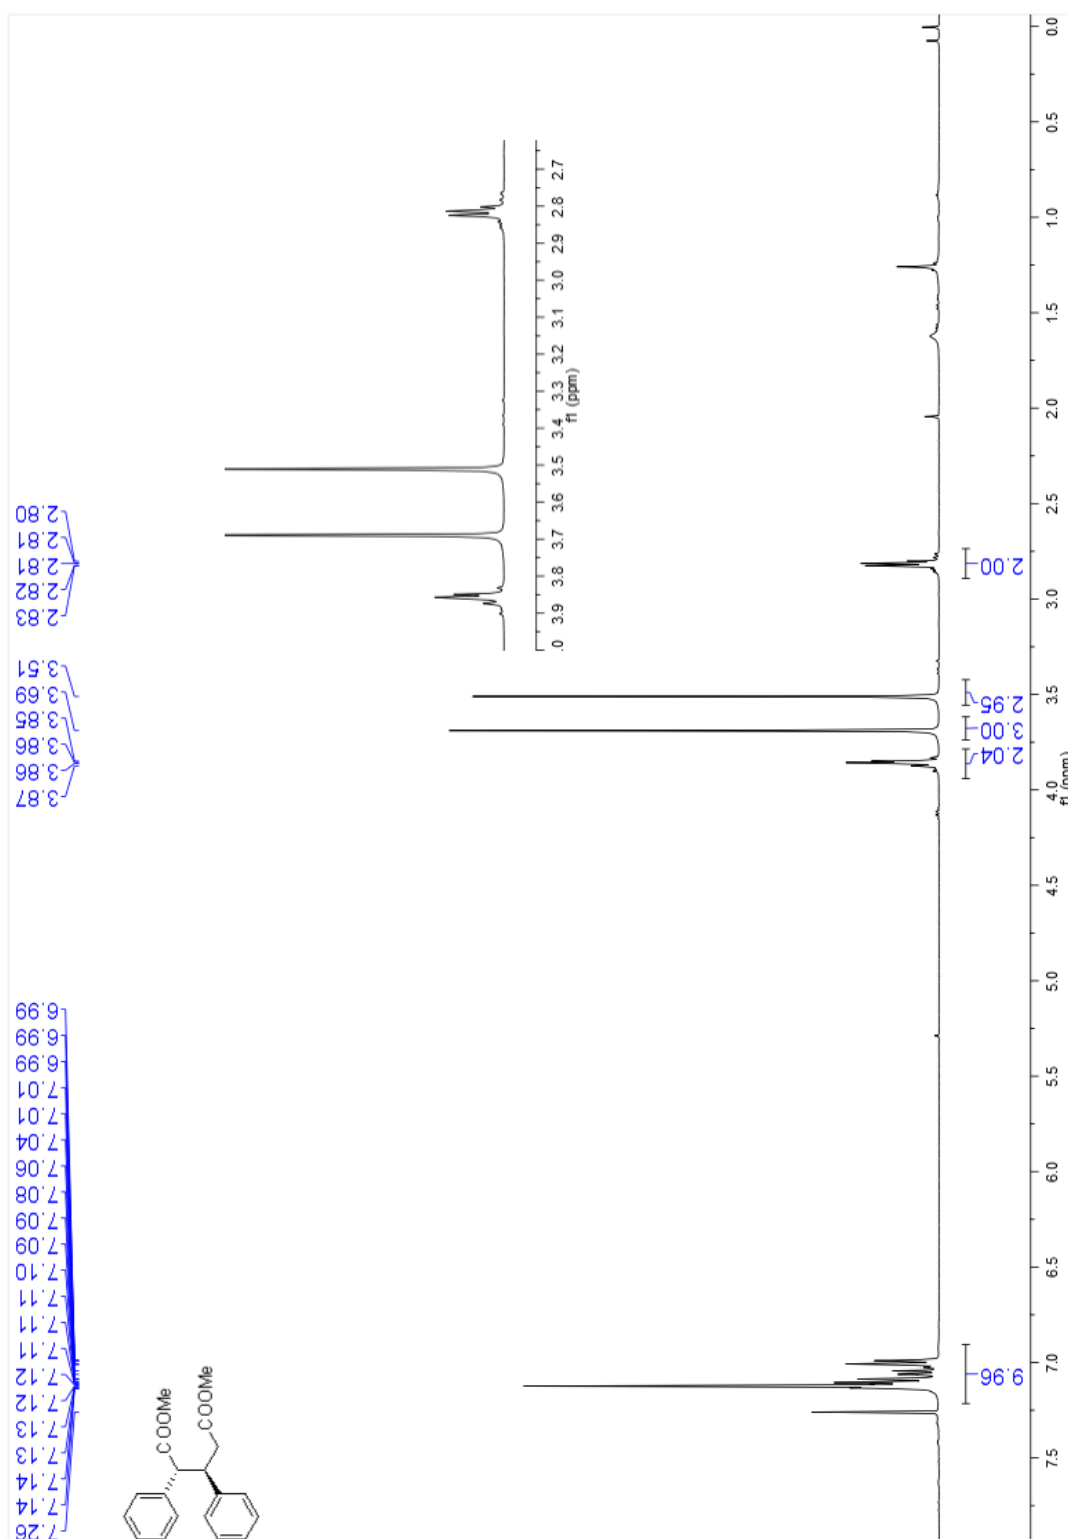

<sup>13</sup>C NMR spectrum of product 4a

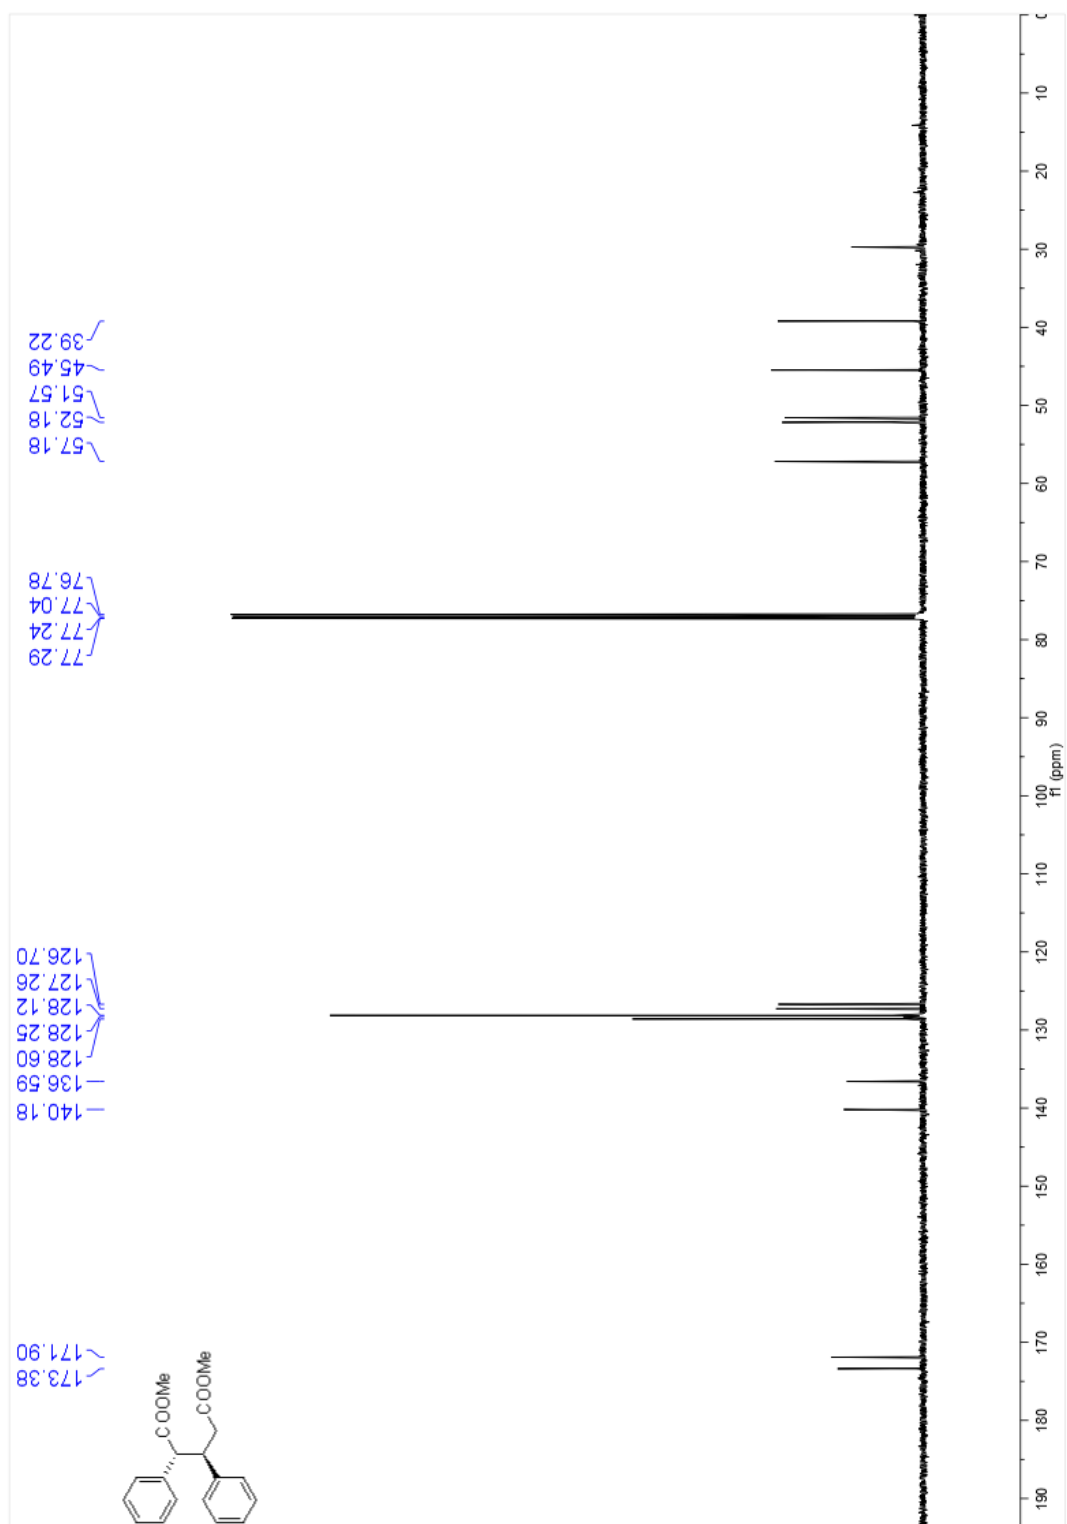

<sup>1</sup>H NMR spectrum of product **4b**

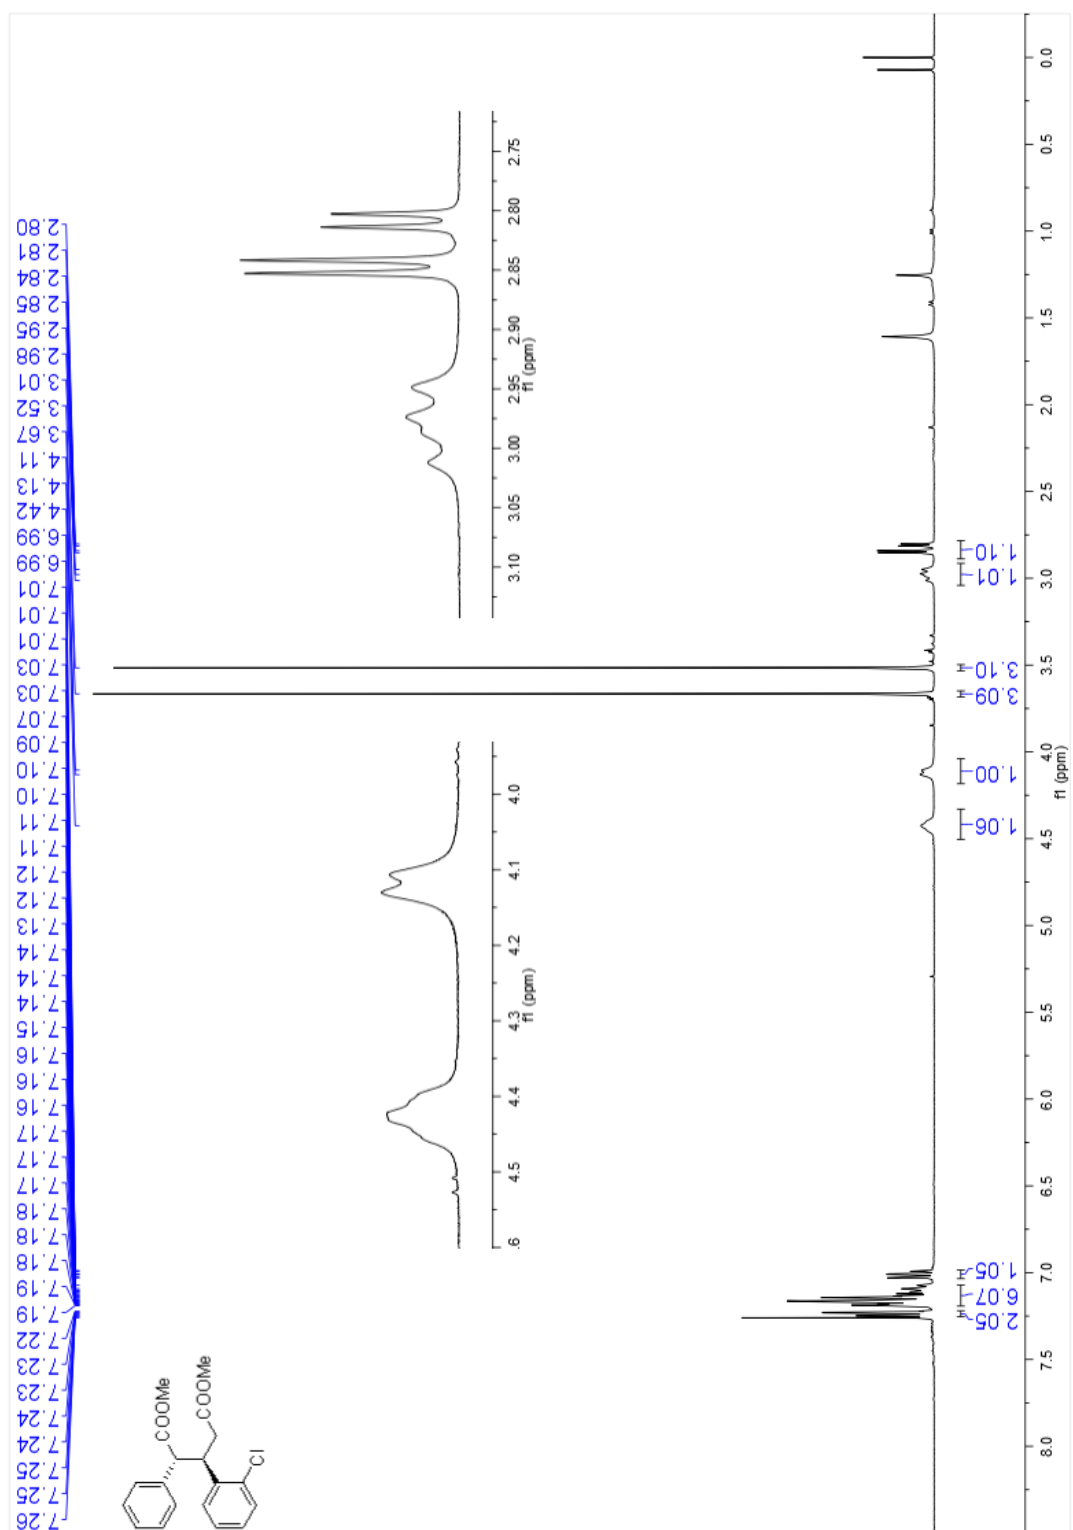

<sup>13</sup>C NMR spectrum of product **4b**

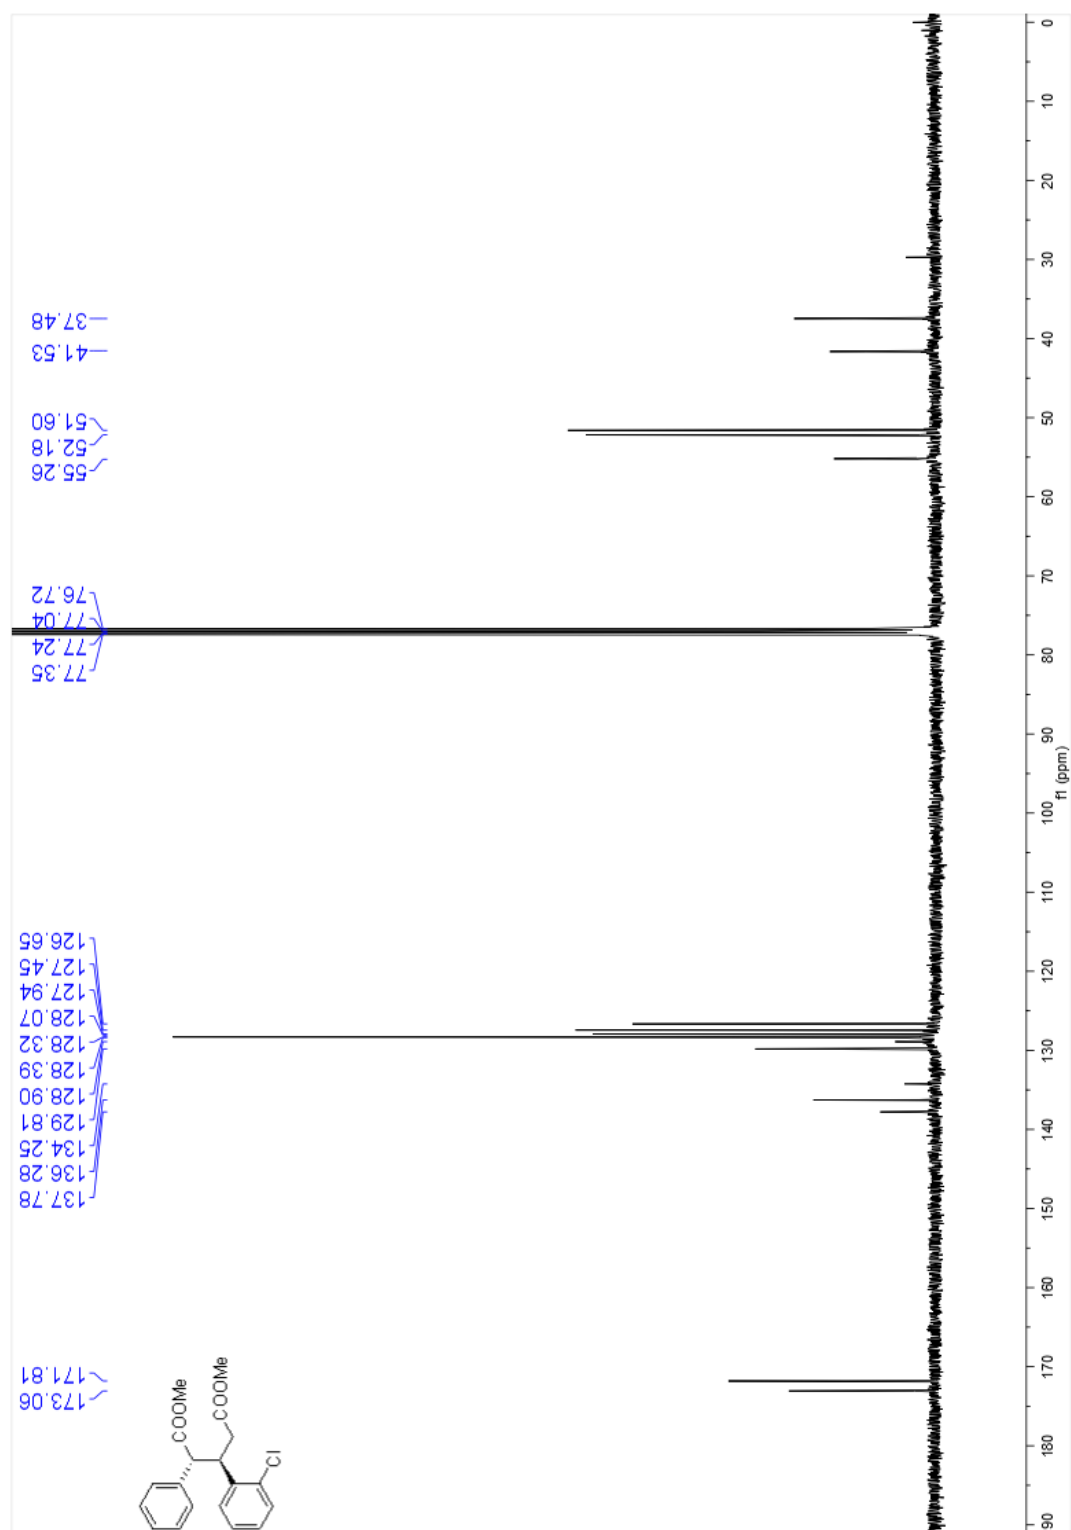

<sup>1</sup>H NMR spectrum of product 4c

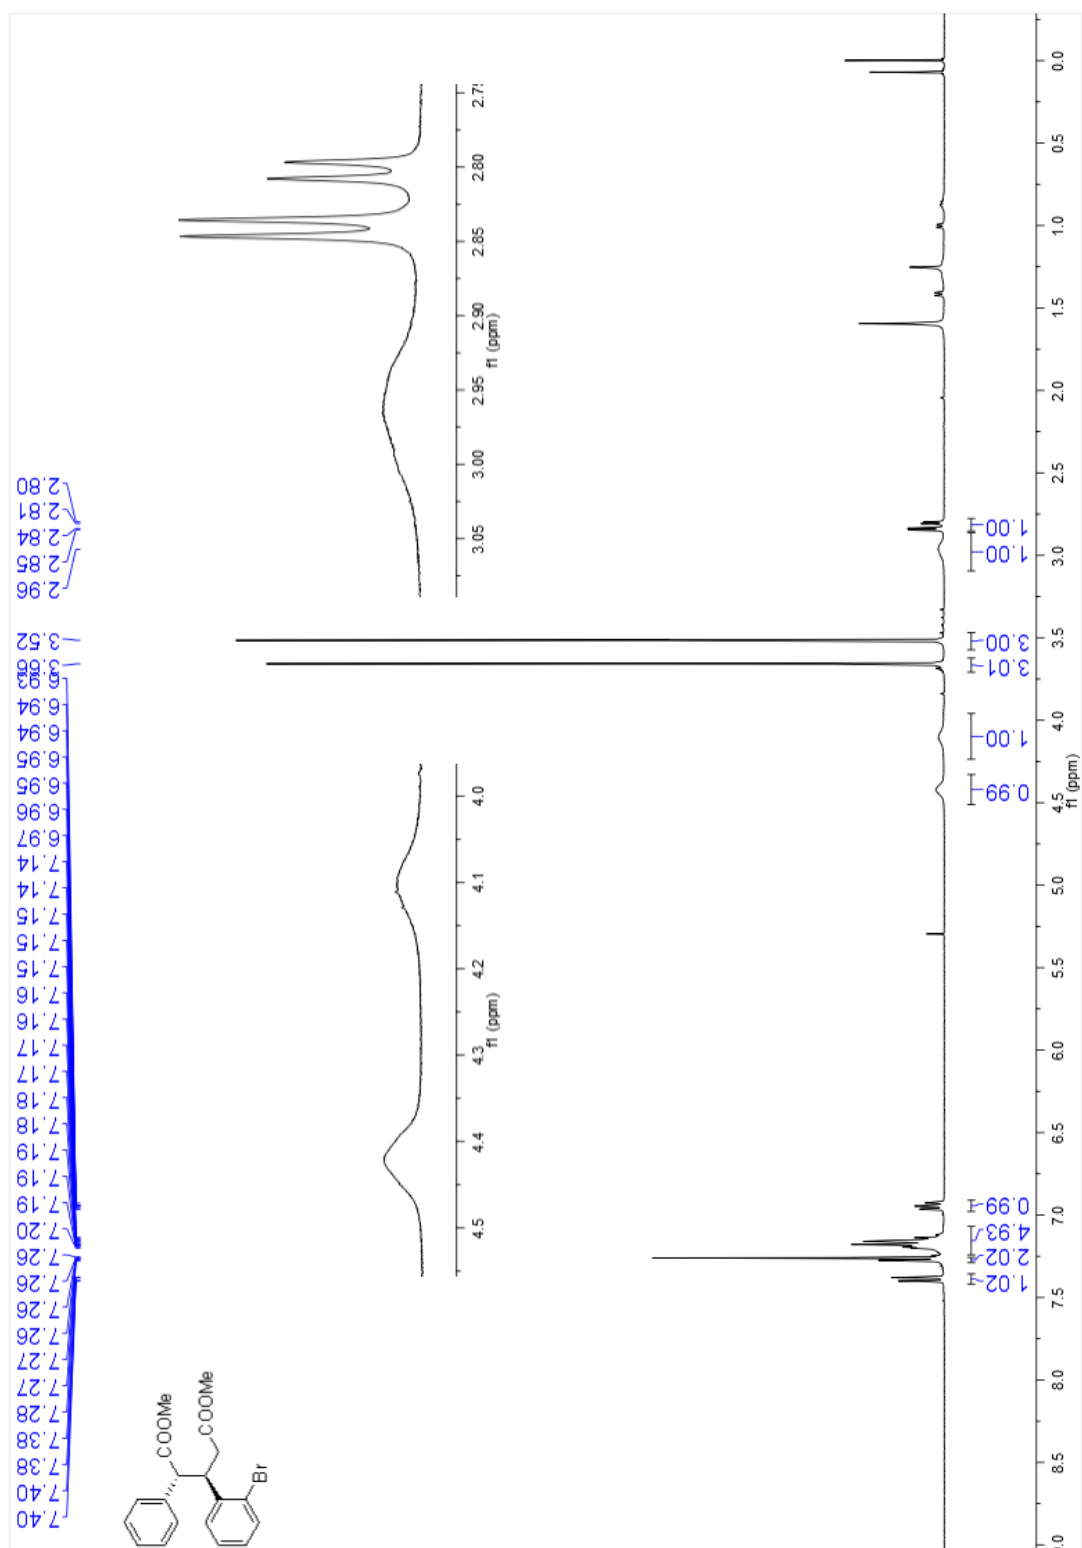

<sup>13</sup>C NMR spectrum of product 4c

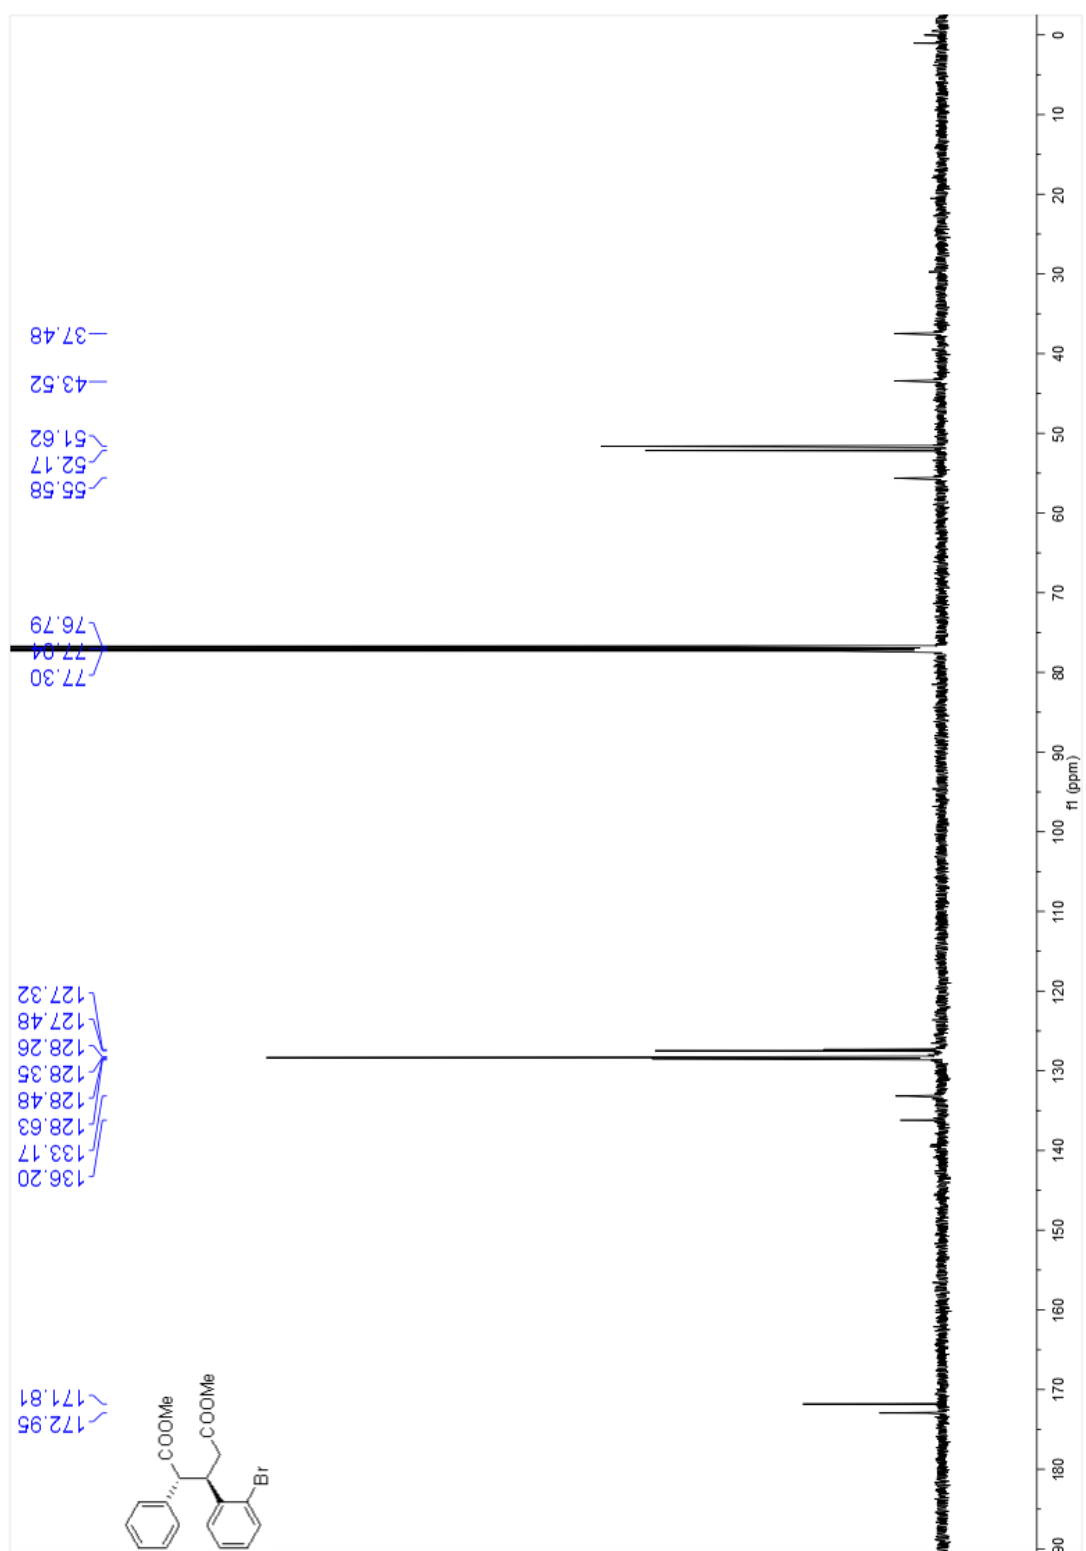

<sup>1</sup>H NMR spectrum of product 4d

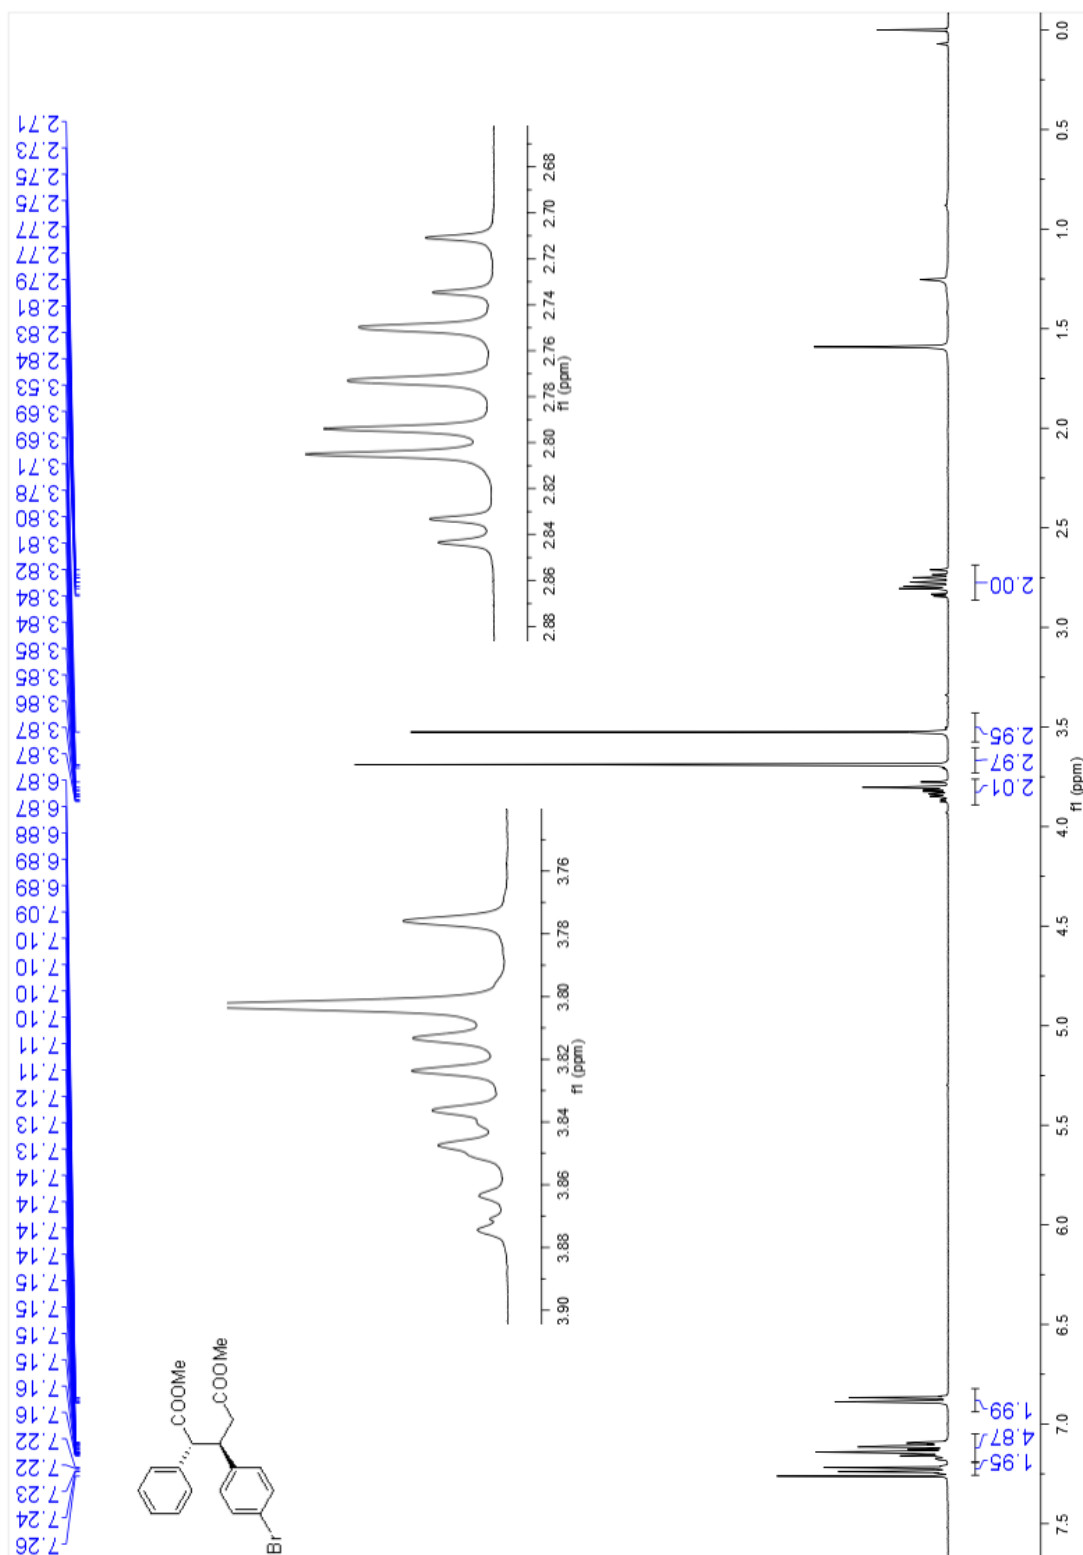



<sup>13</sup>C NMR spectrum of product **4d**

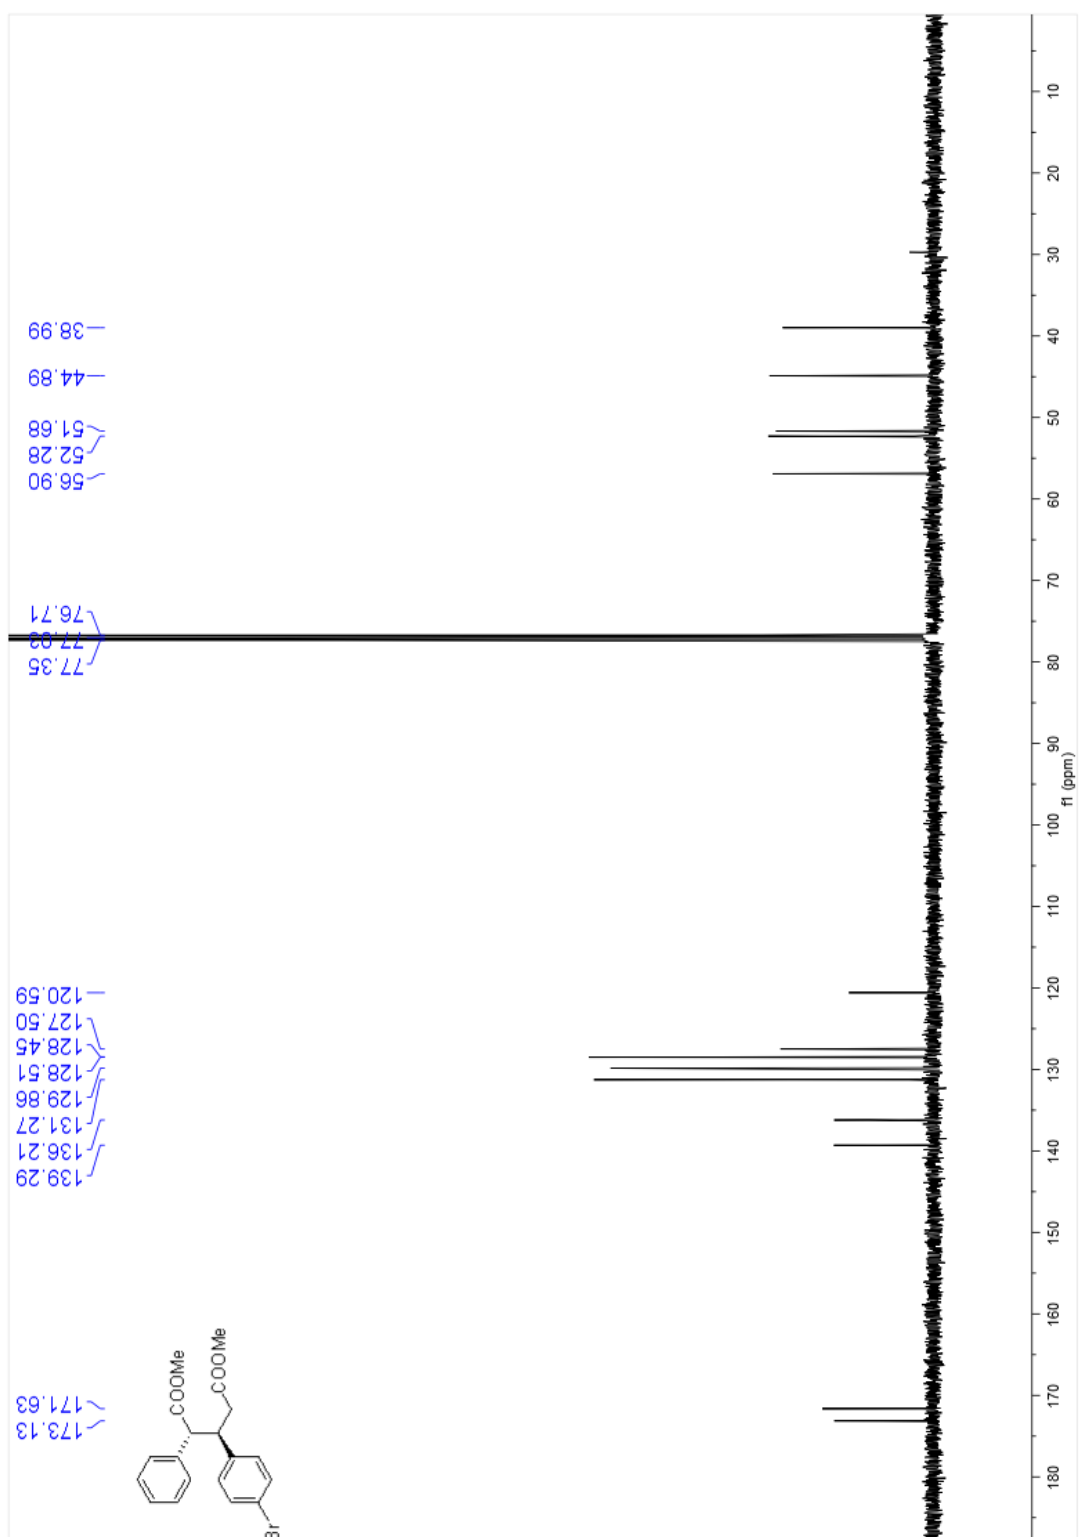

<sup>1</sup>H NMR spectrum of product 4e

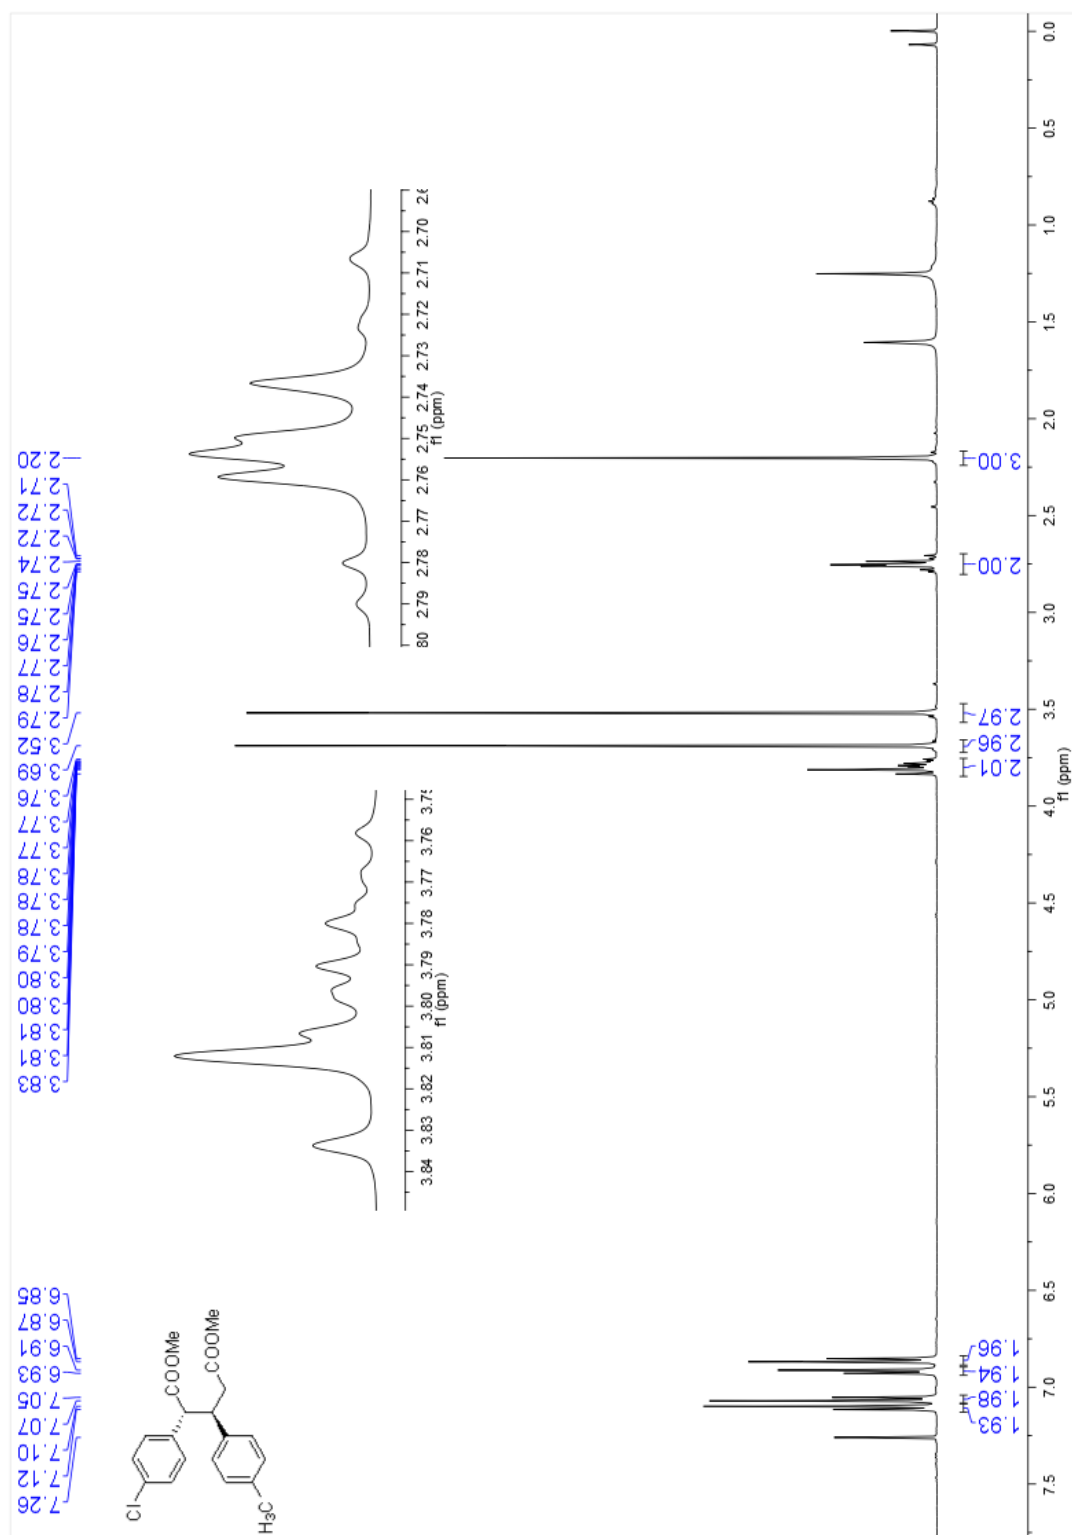

<sup>13</sup>C NMR spectrum of product 4e

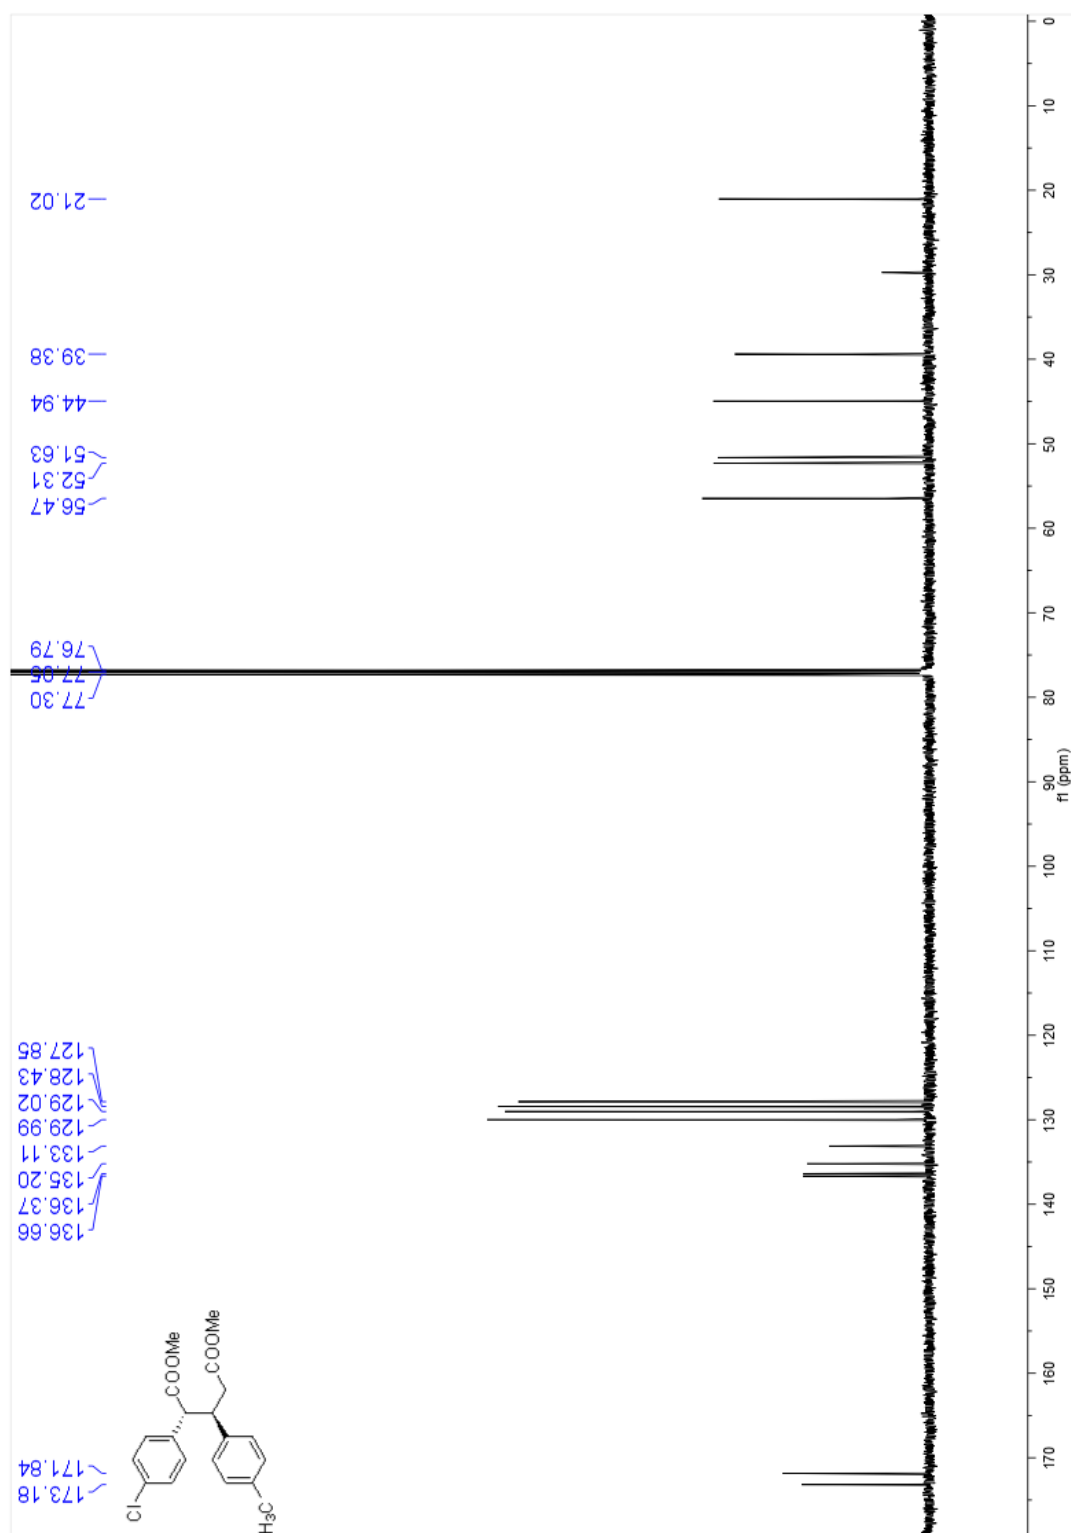

<sup>1</sup>H NMR spectrum of product 4f

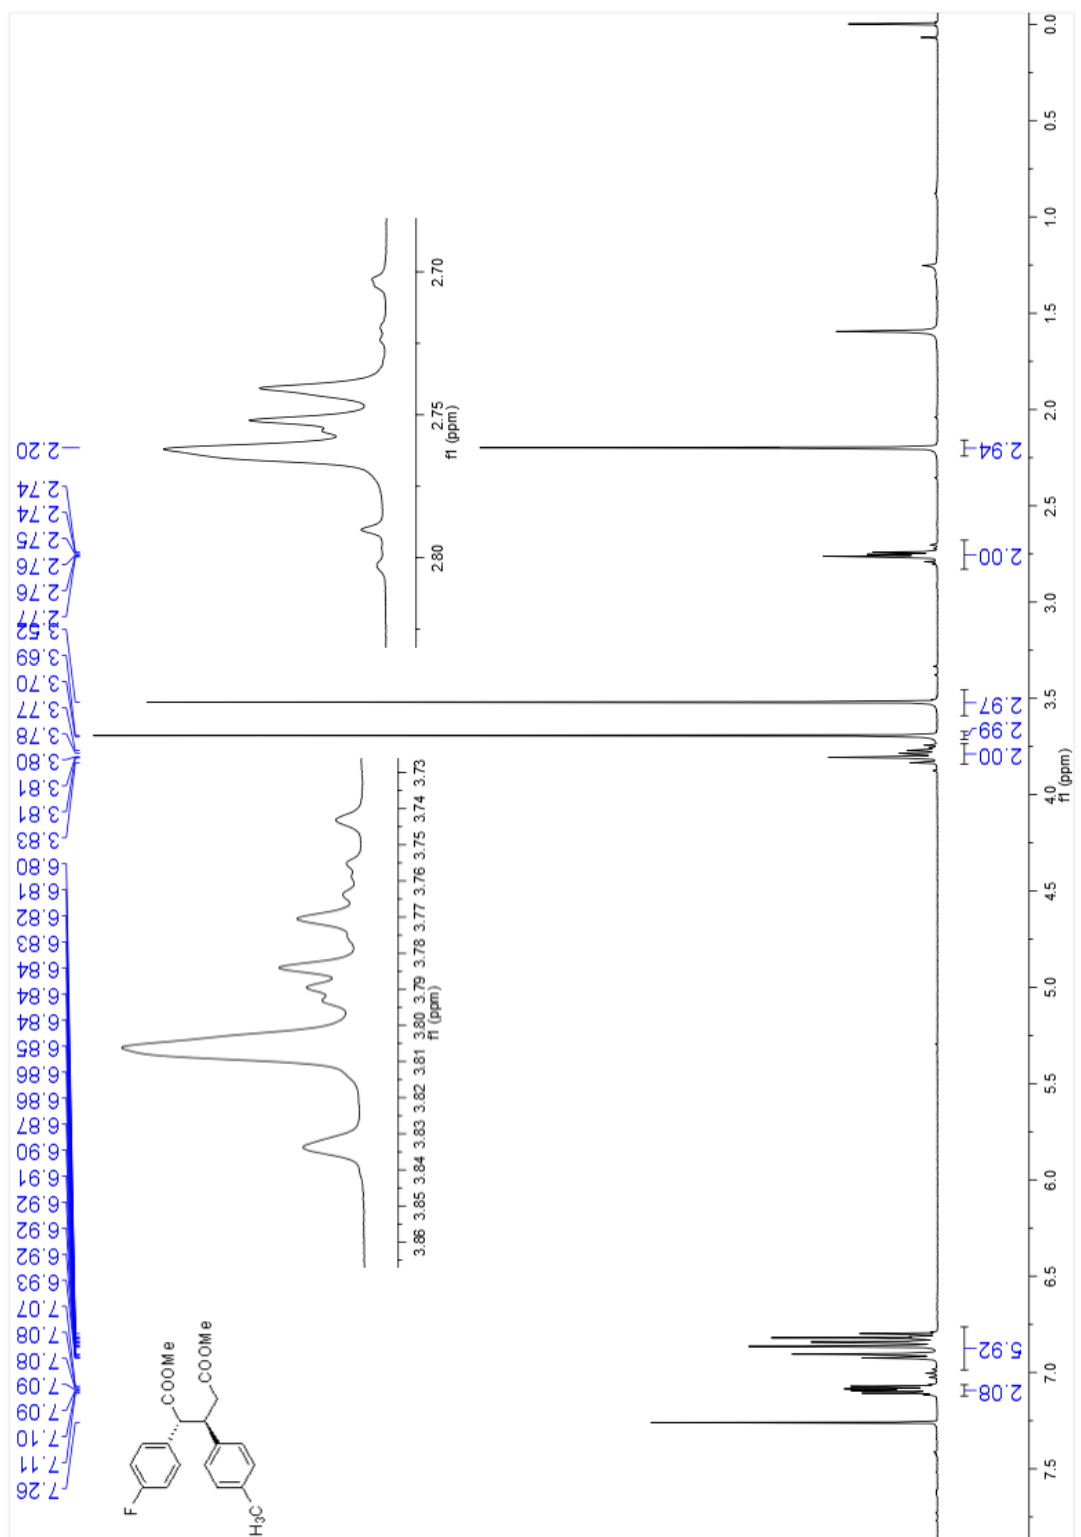

<sup>13</sup>C NMR spectrum of product 4f

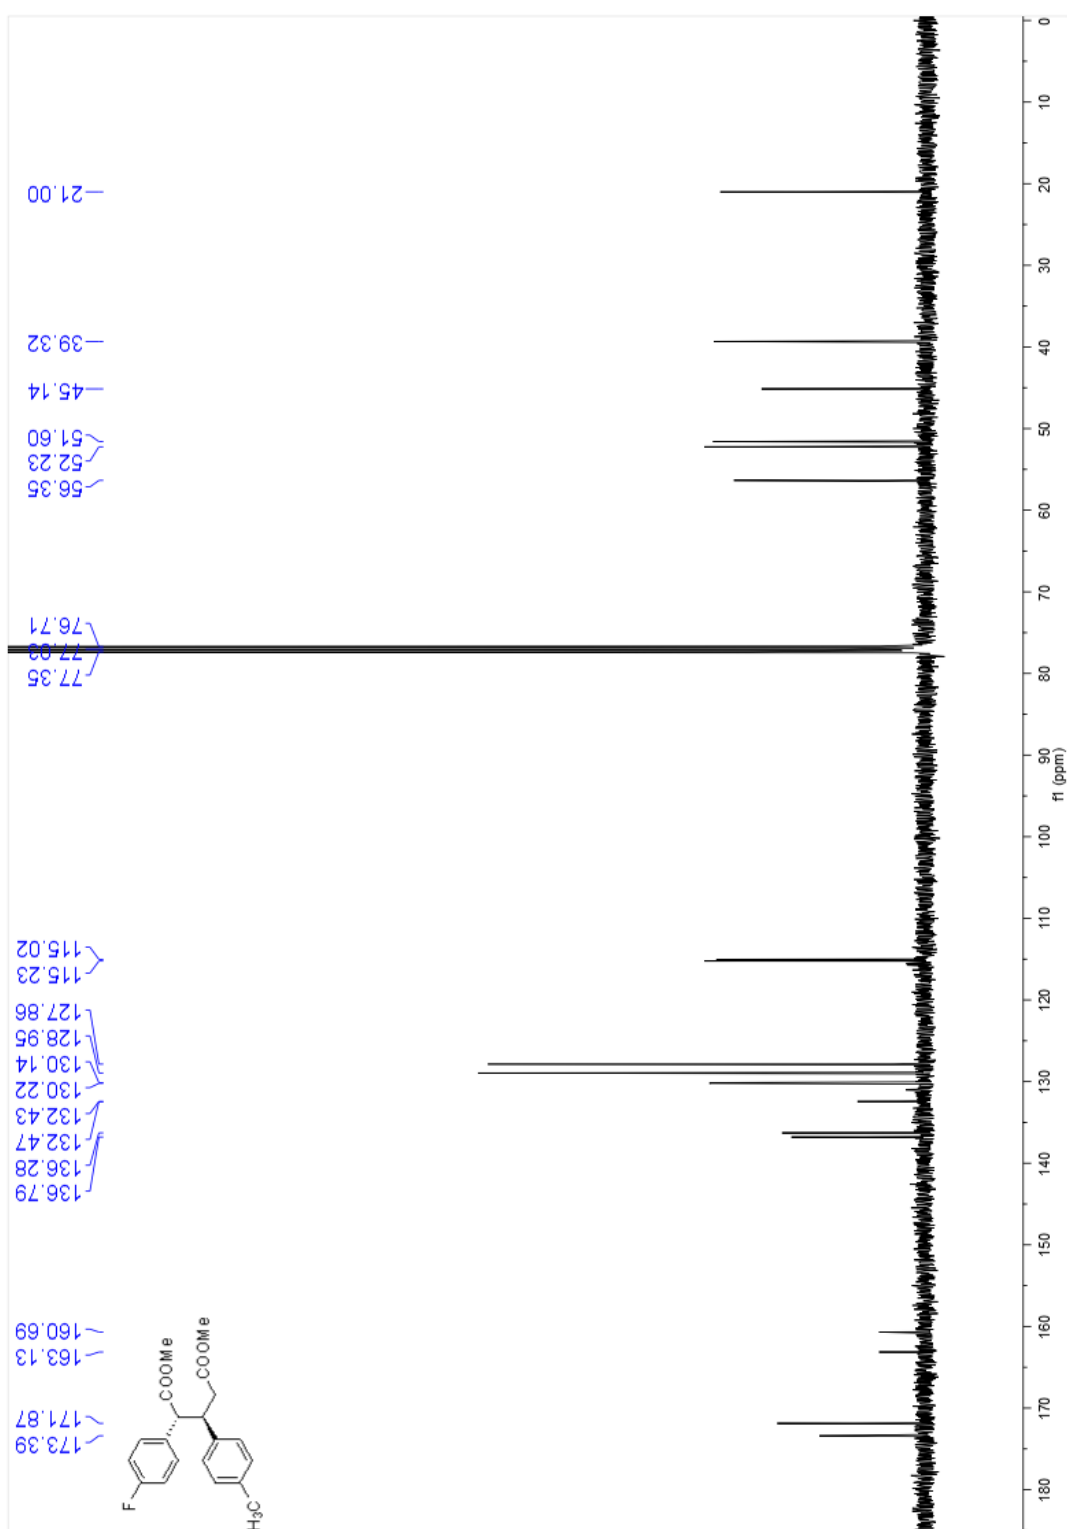

<sup>19</sup>F NMR spectrum of product **4f**

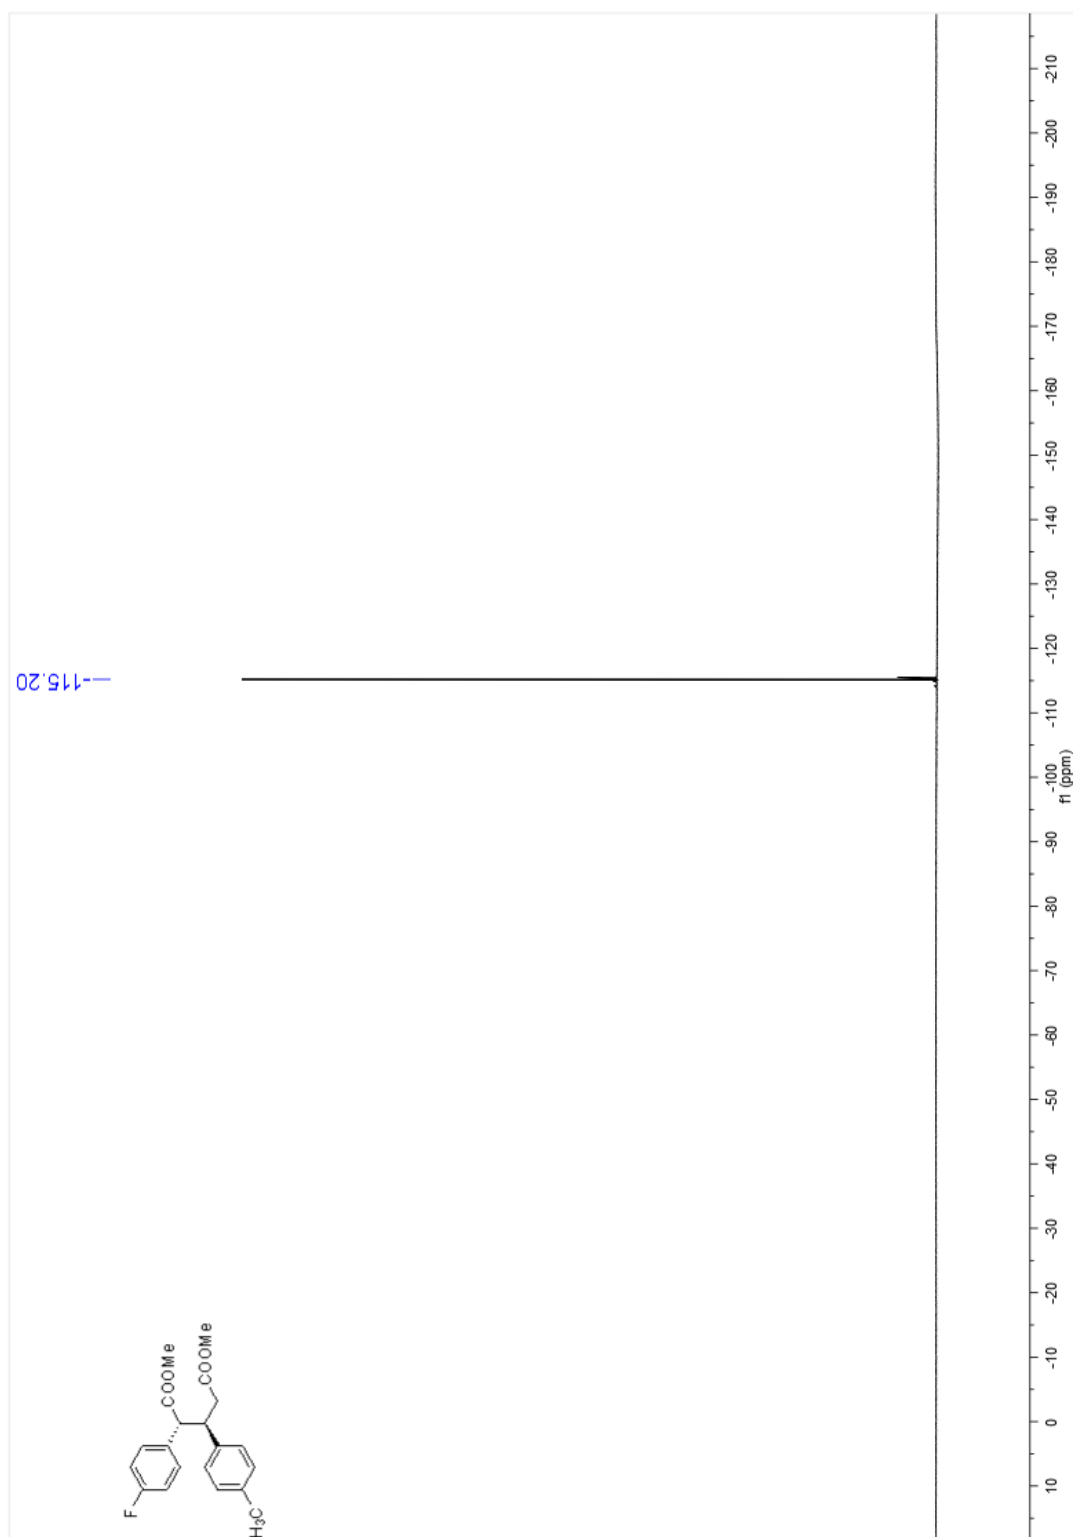

<sup>1</sup>H NMR spectrum of product 4g

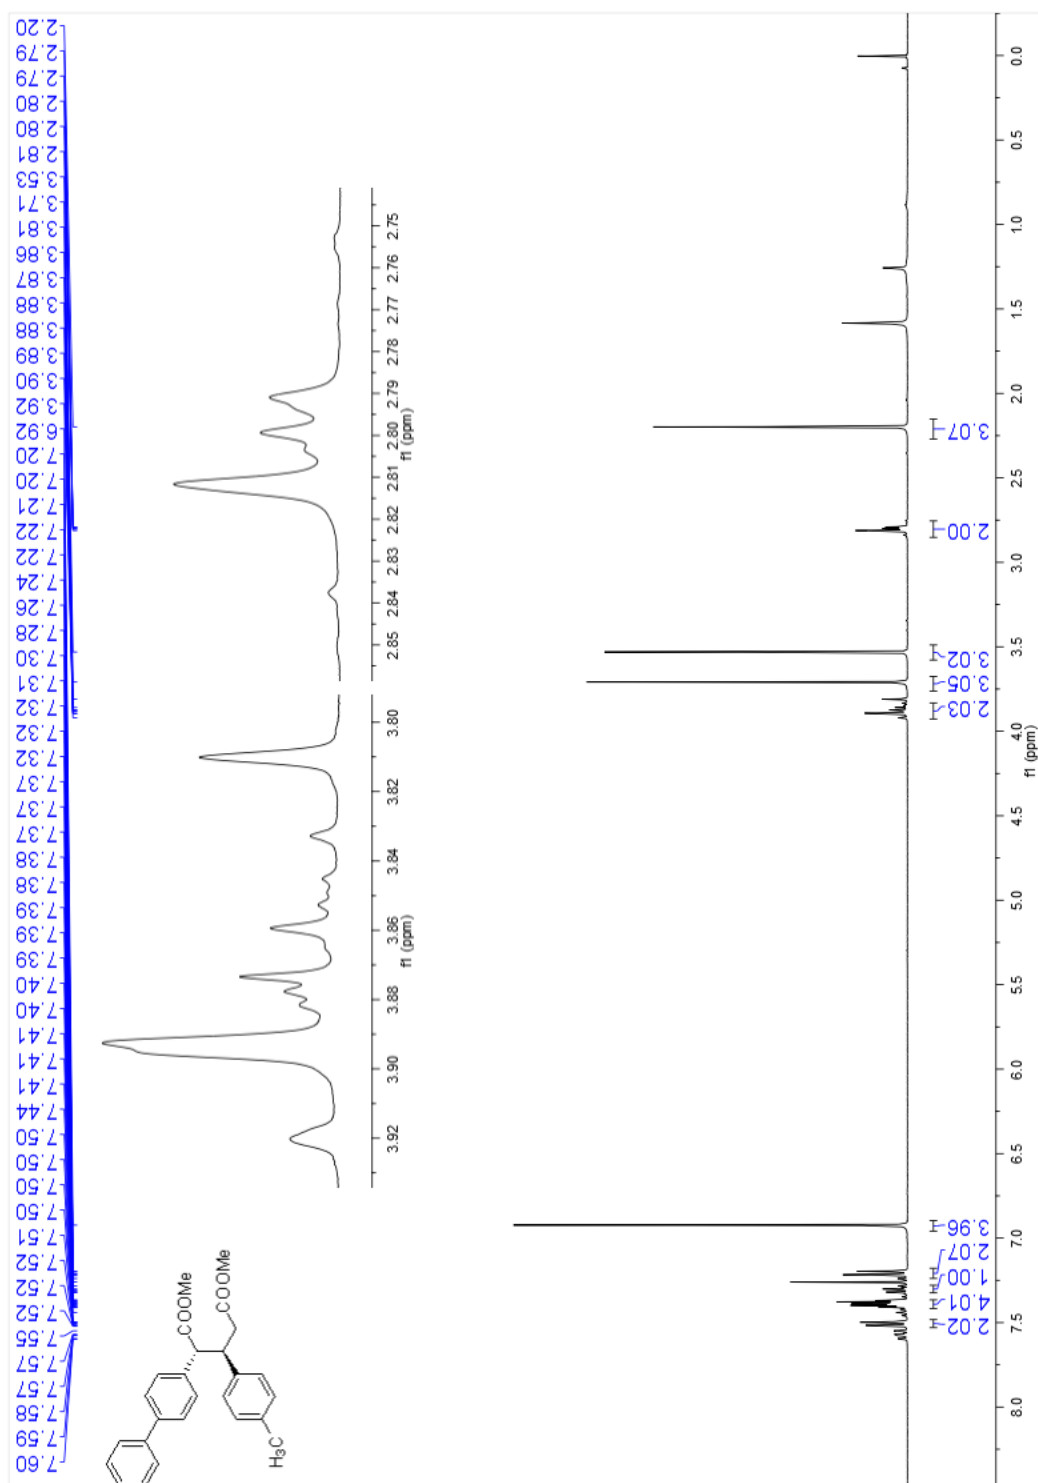

<sup>13</sup>C NMR spectrum of product 4g

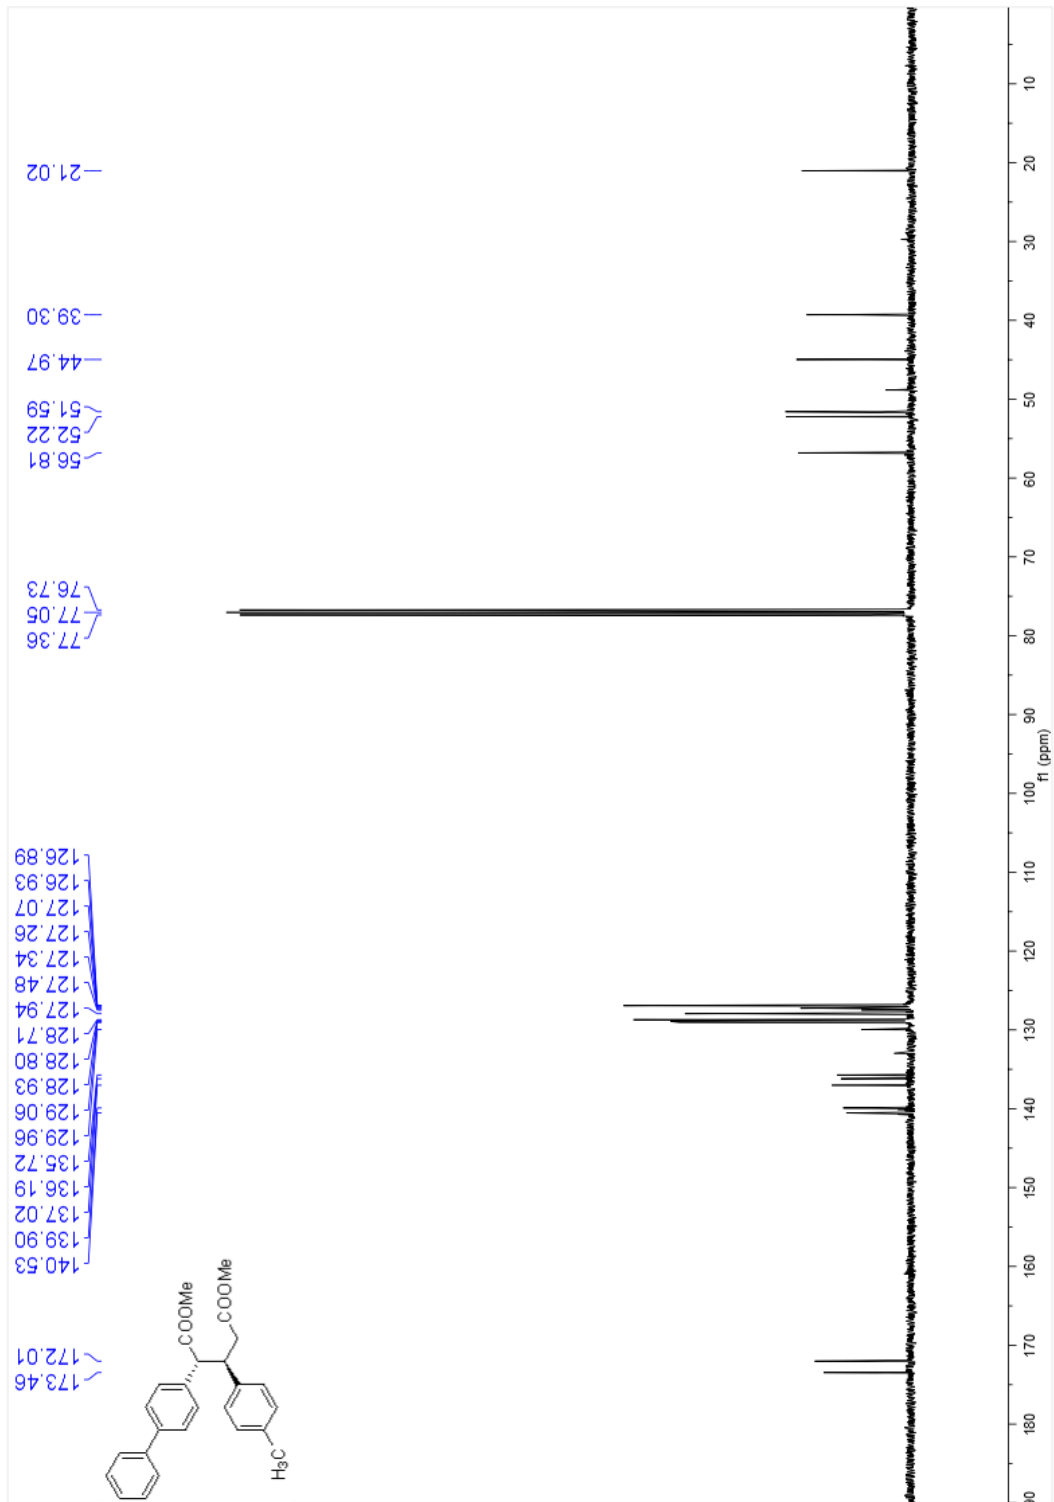



<sup>1</sup>H NMR spectrum of product **4h**

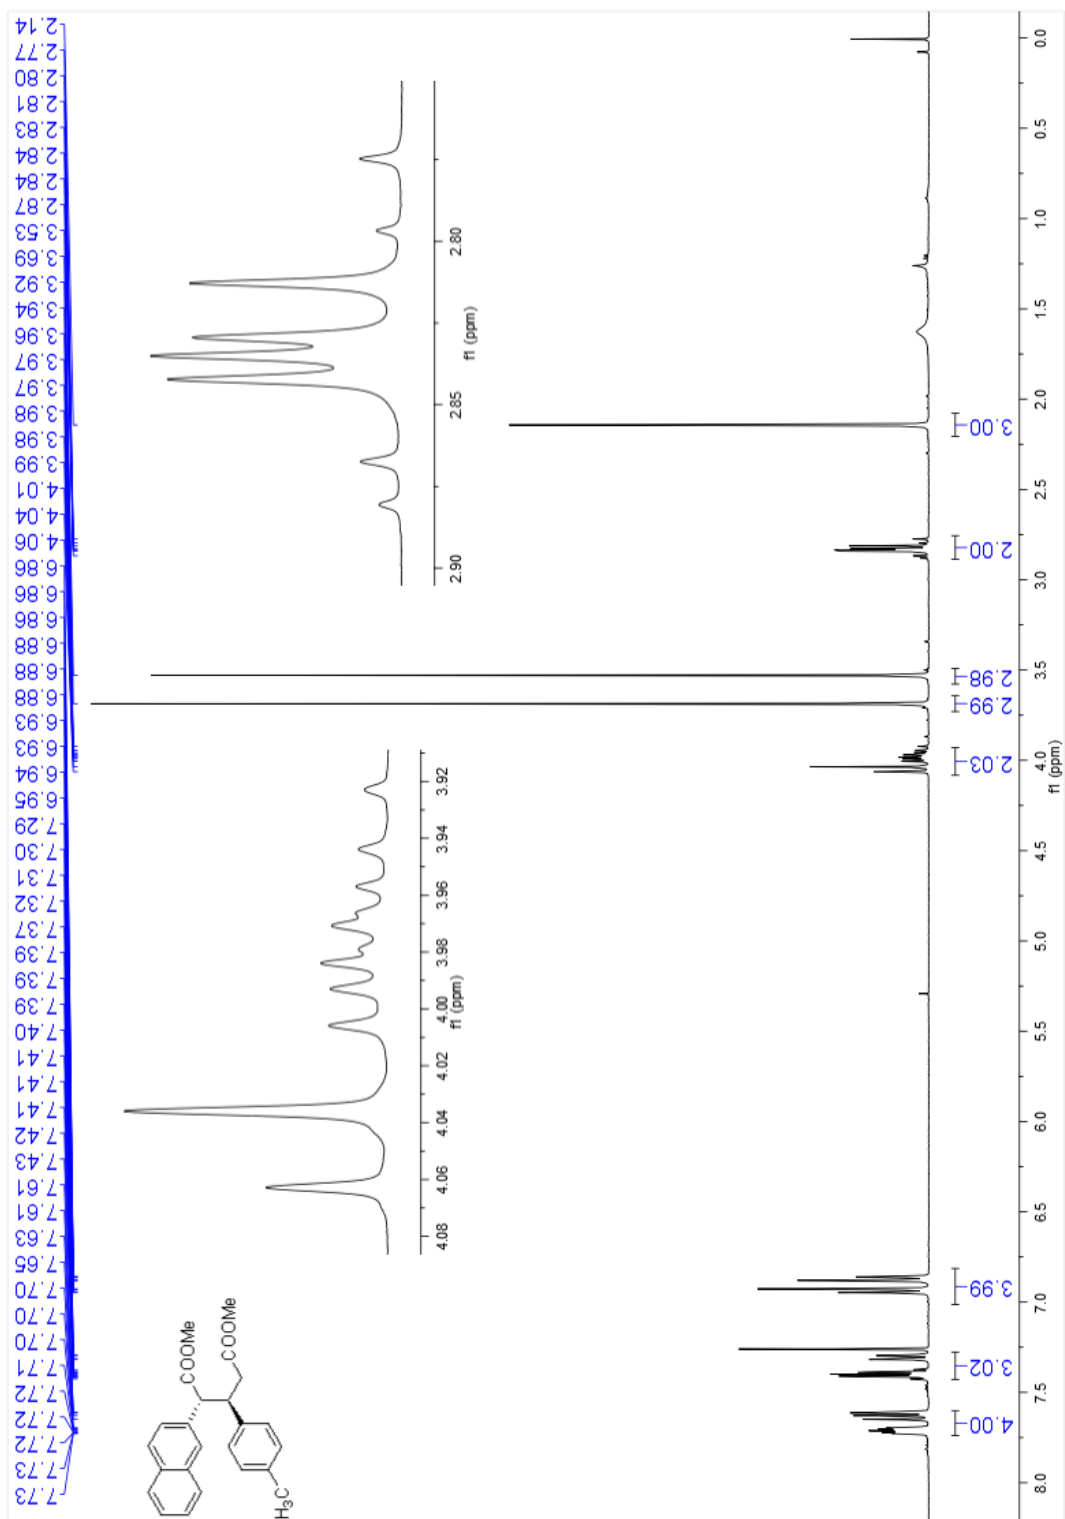

<sup>13</sup>C NMR spectrum of product **4h**

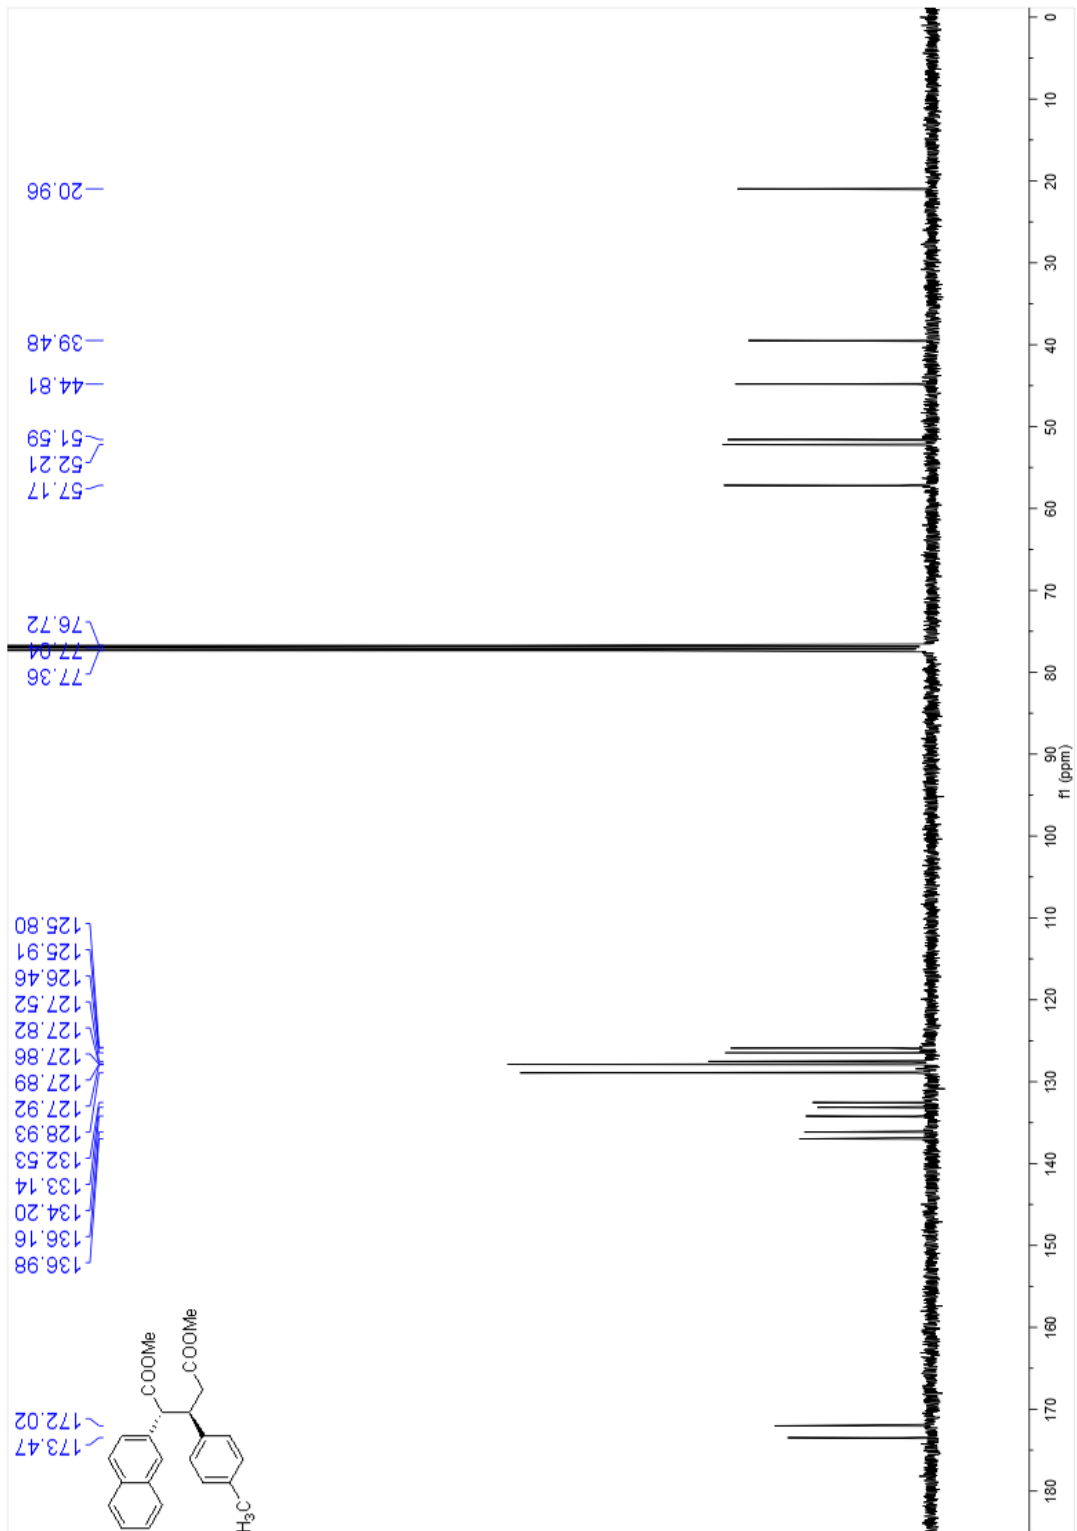

# HPLC Spectra of Compounds 3a-3n

## HPLC spectra of product 3a

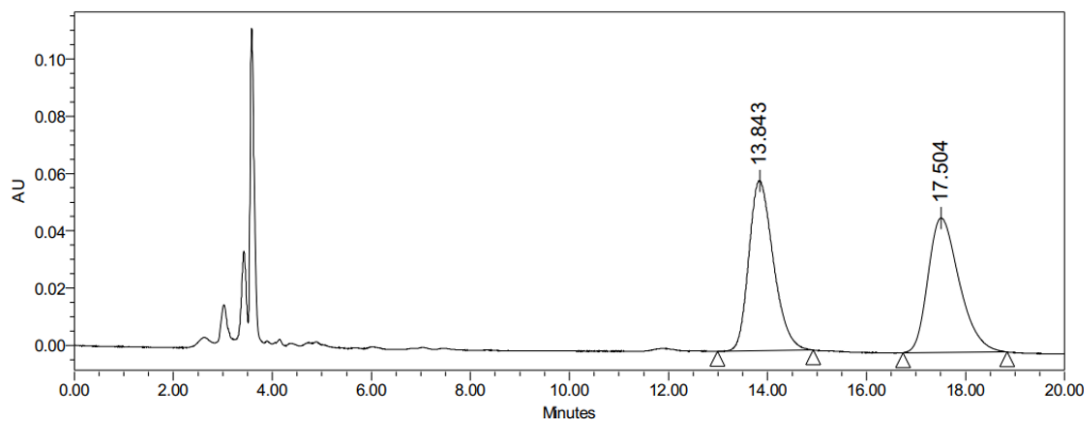

Processed Channel Descr.: 2998 PDA 220.0 nm (2998 (210-400)nm)

|   | Processed Channel Descr.             | RT     | Area    | % Area | Height |
|---|--------------------------------------|--------|---------|--------|--------|
| 1 | 2998 PDA 220.0 nm (2998 (210-400)nm) | 13.843 | 2036832 | 49.64  | 59408  |
| 2 | 2998 PDA 220.0 nm (2998 (210-400)nm) | 17.504 | 2066009 | 50.36  | 46964  |

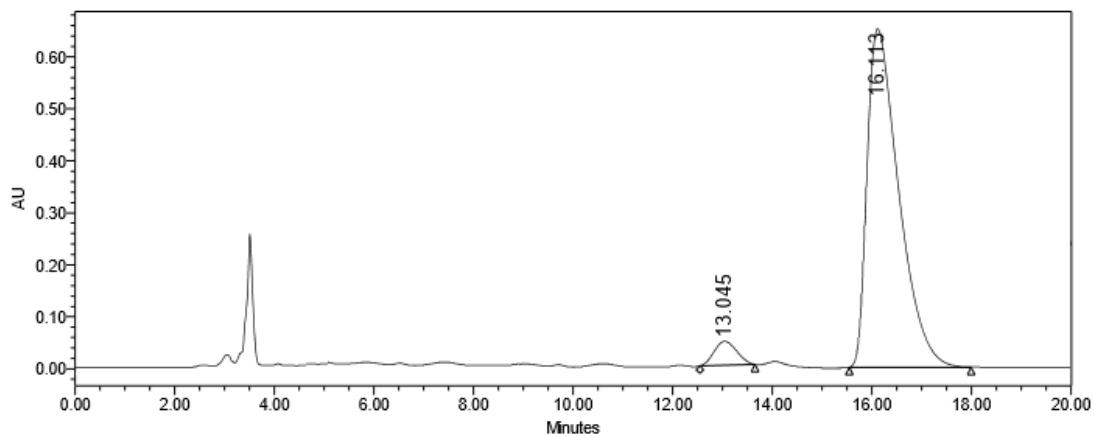

Channel: 2998; Processed Channel: 2998 PDA 220.0 nm (2998 (210-400)nm); Result Id: 2424; Processing Method: AsyEt

Processed Channel Descr.: 2998 PDA 220.0 nm (2998 (210-400)nm)

|   | Processed Channel Descr.             | RT     | Area     | % Area | Height |
|---|--------------------------------------|--------|----------|--------|--------|
| 1 | 2998 PDA 220.0 nm (2998 (210-400)nm) | 13.045 | 1458401  | 4.82   | 46003  |
| 2 | 2998 PDA 220.0 nm (2998 (210-400)nm) | 16.113 | 28795520 | 95.18  | 651343 |

### HPLC spectra of product **3b**

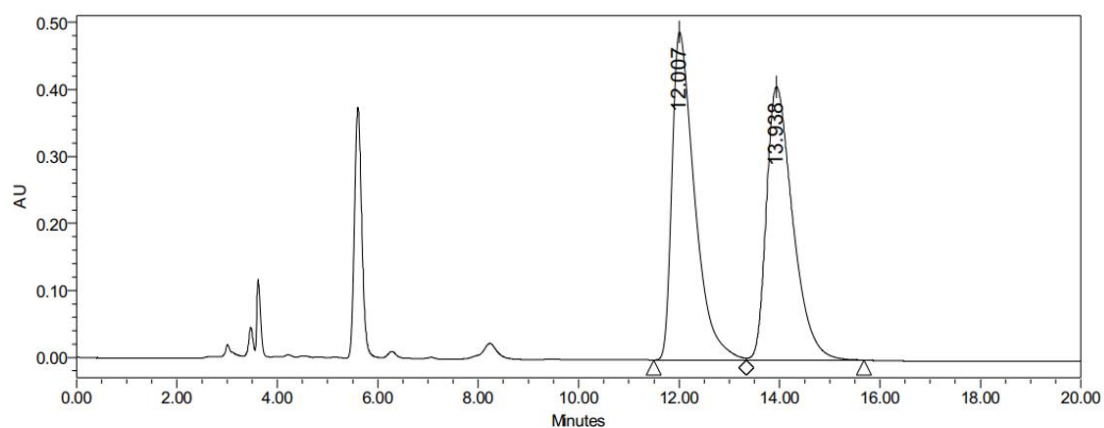

**Processed Channel Descr.: 2998 PDA 220.0 nm (2998 (210-400)nm)**

|   | Processed Channel Descr.             | RT     | Area     | % Area | Height |
|---|--------------------------------------|--------|----------|--------|--------|
| 1 | 2998 PDA 220.0 nm (2998 (210-400)nm) | 12.007 | 15330820 | 50.80  | 489515 |
| 2 | 2998 PDA 220.0 nm (2998 (210-400)nm) | 13.938 | 14846732 | 49.20  | 407896 |

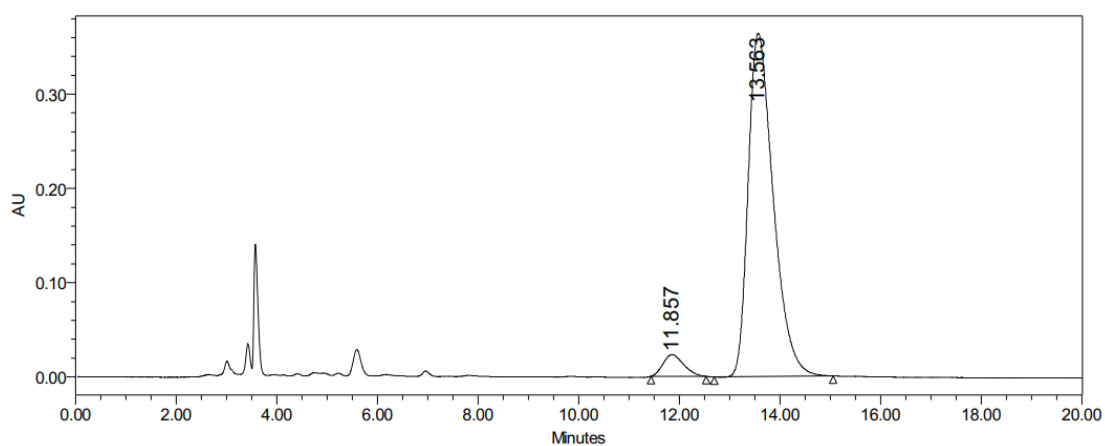

Channel: 2998; Processed Channel: 2998 PDA 220.0 nm (2998 (210-400)nm); Result Id: 2415; Processing Method: 4Me

**Processed Channel Descr.: 2998 PDA 220.0 nm (2998 (210-400)nm)**

|   | Processed Channel Descr.             | RT     | Area     | % Area | Height |
|---|--------------------------------------|--------|----------|--------|--------|
| 1 | 2998 PDA 220.0 nm (2998 (210-400)nm) | 11.857 | 661783   | 4.98   | 23237  |
| 2 | 2998 PDA 220.0 nm (2998 (210-400)nm) | 13.563 | 12621166 | 95.02  | 364154 |

### HPLC spectra of product 3c

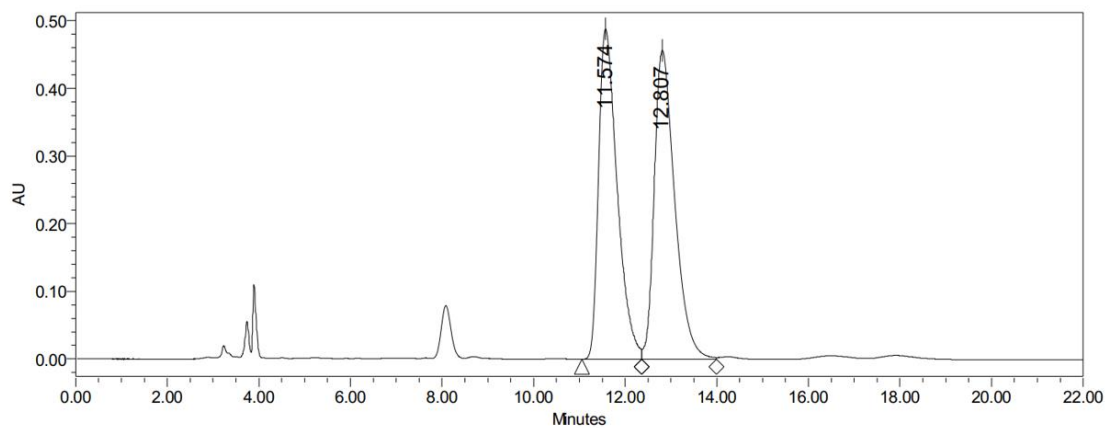

**Processed Channel Descr.: 2998 PDA 220.0 nm (2998 (210-400)nm)**

|   | Processed Channel Descr.             | RT     | Area     | % Area | Height |
|---|--------------------------------------|--------|----------|--------|--------|
| 1 | 2998 PDA 220.0 nm (2998 (210-400)nm) | 11.574 | 13779050 | 49.30  | 488371 |
| 2 | 2998 PDA 220.0 nm (2998 (210-400)nm) | 12.807 | 14173161 | 50.70  | 456706 |

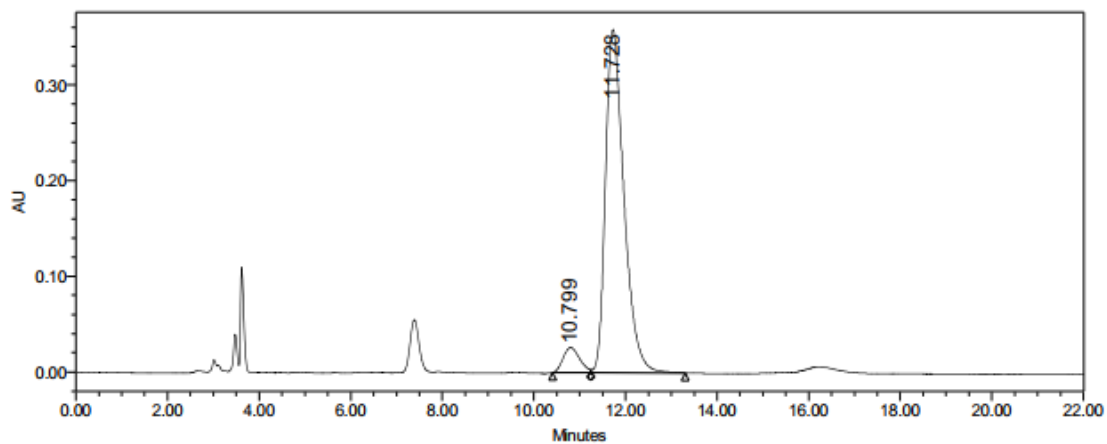

Channel: 2998; Processed Channel: 2998 PDA 220.0 nm (2998 (210-400)nm); Result Id: 2406;  
Processing Method: Asy4OMe

**Processed Channel Descr.: 2998 PDA 220.0 nm (2998 (210-400)nm)**

|   | Processed Channel Descr.             | RT     | Area     | % Area | Height |
|---|--------------------------------------|--------|----------|--------|--------|
| 1 | 2998 PDA 220.0 nm (2998 (210-400)nm) | 10.799 | 657178   | 6.14   | 26159  |
| 2 | 2998 PDA 220.0 nm (2998 (210-400)nm) | 11.728 | 10045121 | 93.86  | 358461 |

### HPLC spectra of product **3d**

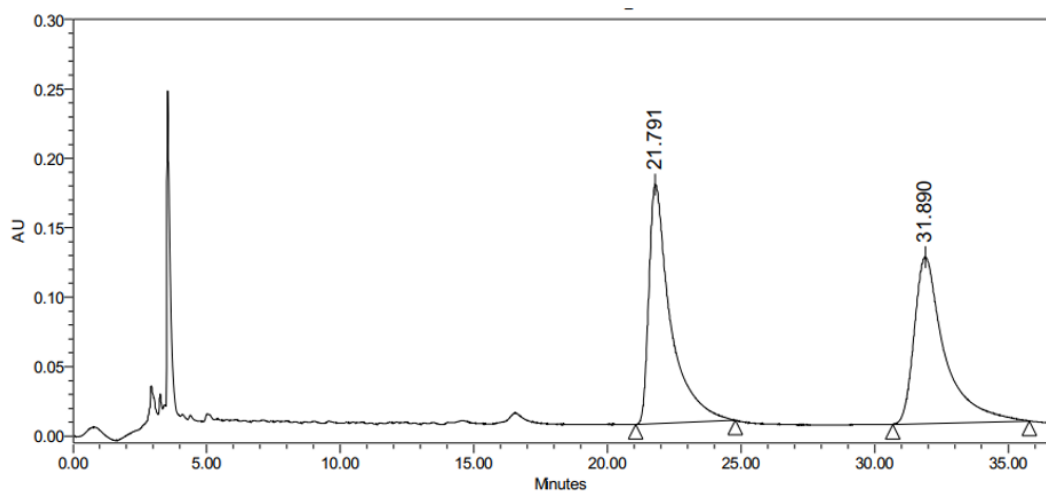

|   | Name | RT     | Area    | Height | % Area |
|---|------|--------|---------|--------|--------|
| 1 |      | 21.791 | 9667183 | 172319 | 50.65  |
| 2 |      | 31.890 | 9418327 | 119865 | 49.35  |

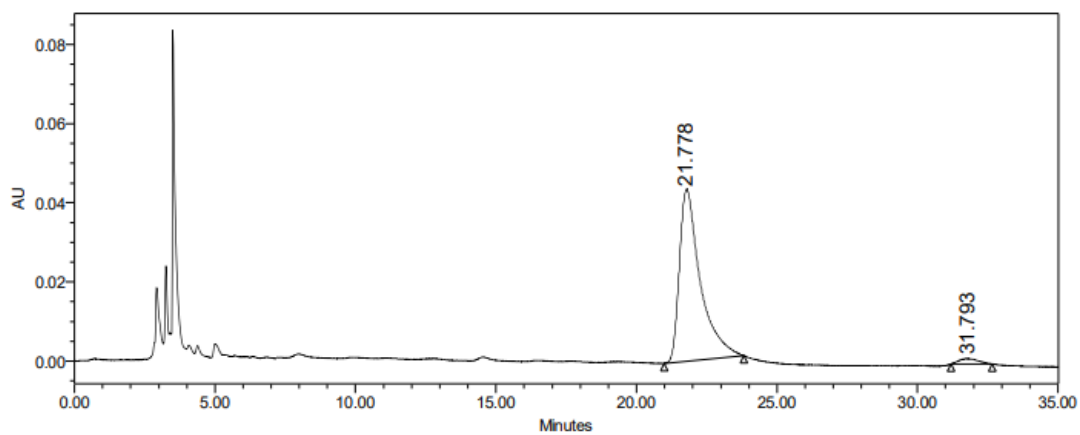

Channel: 2998; Processed Channel: 2998 PDA 228.0 nm (2998 (210-400)nm); Result Id: 1960; Processing Method: 11012023

#### Processed Channel Descr.: 2998 PDA 228.0 nm (2998 (210-400)nm)

|   | Processed Channel Descr.             | RT     | Area    | % Area | Height |
|---|--------------------------------------|--------|---------|--------|--------|
| 1 | 2998 PDA 228.0 nm (2998 (210-400)nm) | 21.778 | 2244692 | 97.09  | 43505  |
| 2 | 2998 PDA 228.0 nm (2998 (210-400)nm) | 31.793 | 67343   | 2.91   | 1418   |

### HPLC spectra of product 3e

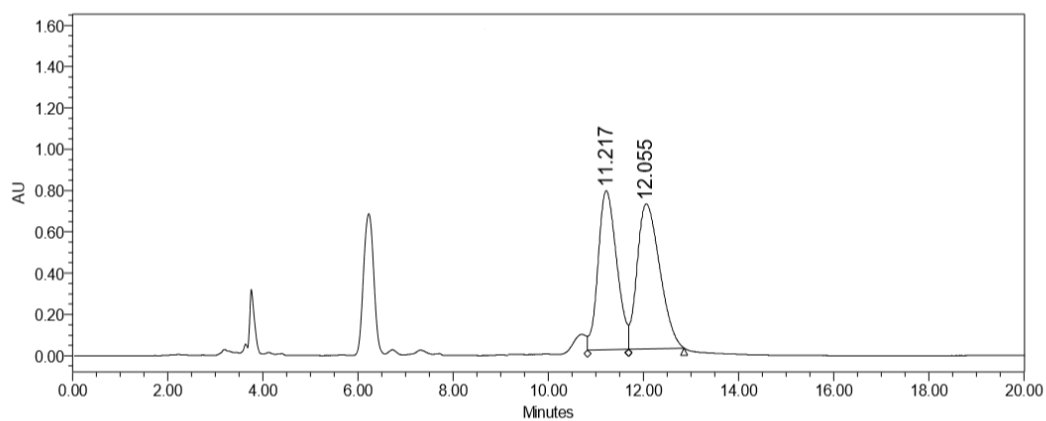

Channel: 2998; Processed Channel: 2998 PDA 220.0 nm (2998 (210-400)nm); Result Id: 2765; Processing Method: 11012023

**Processed Channel Descr.: 2998 PDA 220.0 nm (2998 (210-400)nm)**

|   | Processed Channel Descr.             | RT     | Area     | % Area | Height |
|---|--------------------------------------|--------|----------|--------|--------|
| 1 | 2998 PDA 220.0 nm (2998 (210-400)nm) | 11.217 | 20888558 | 47.41  | 769999 |
| 2 | 2998 PDA 220.0 nm (2998 (210-400)nm) | 12.055 | 23174874 | 52.59  | 701706 |

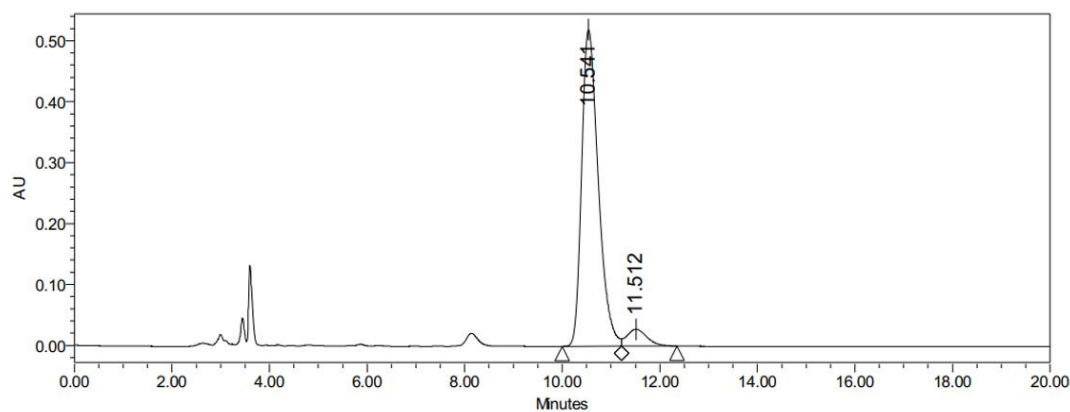

**Peak Name:**

|   | Injection | RT     | Area     | % Area | Height |
|---|-----------|--------|----------|--------|--------|
| 1 | 1         | 11.512 | 789520   | 6.03   | 27634  |
| 2 | 1         | 10.541 | 12307442 | 93.97  | 519712 |

### HPLC spectra of product 3f

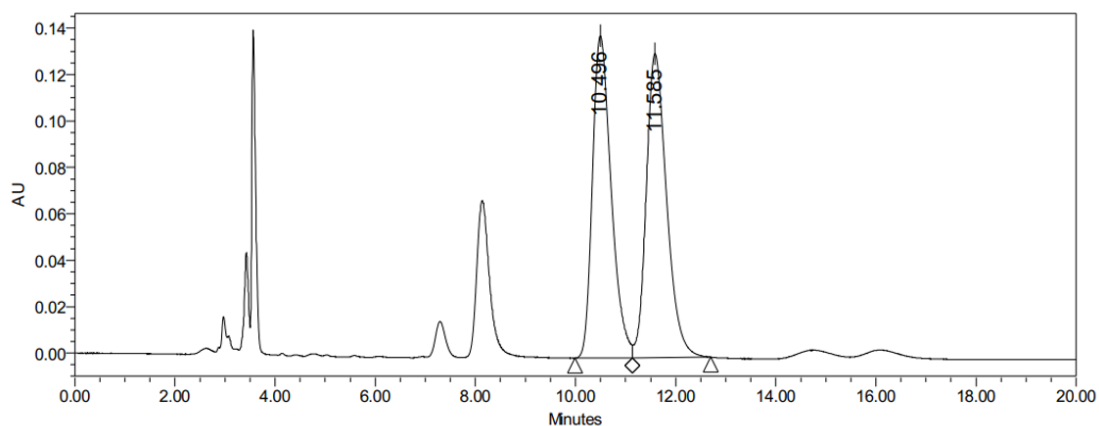

**Peak Name:**

|   | Injection | RT     | Area    | % Area | Height |
|---|-----------|--------|---------|--------|--------|
| 1 | 1         | 11.585 | 3700639 | 50.62  | 131009 |
| 2 | 1         | 10.496 | 3610680 | 49.38  | 138849 |

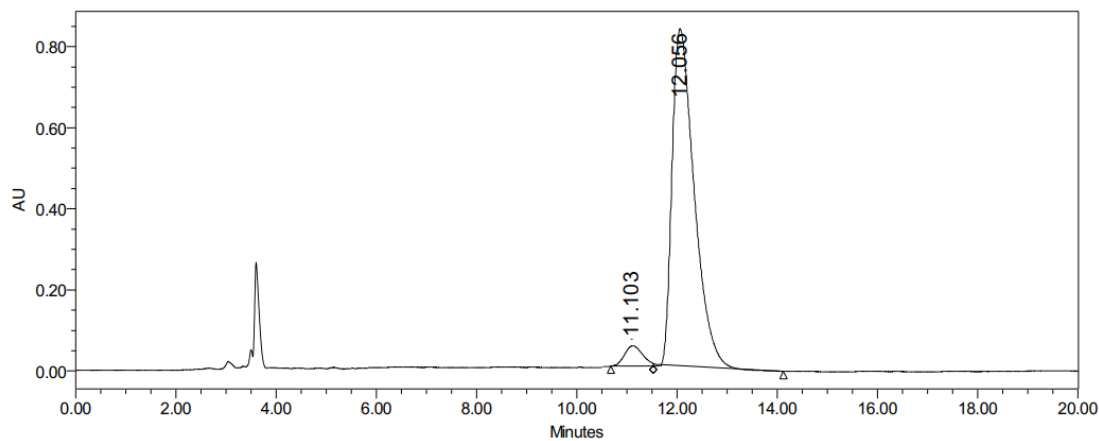

Channel: 2998; Processed Channel: 2998 PDA 220.0 nm (2998 (210-400)nm); Result Id: 4192; Processing Method: 00

**Processed Channel Descr.: 2998 PDA 220.0 nm (2998 (210-400)nm)**

|   | Processed Channel Descr.             | RT     | Area     | % Area | Height |
|---|--------------------------------------|--------|----------|--------|--------|
| 1 | 2998 PDA 220.0 nm (2998 (210-400)nm) | 11.103 | 1247742  | 4.67   | 56656  |
| 2 | 2998 PDA 220.0 nm (2998 (210-400)nm) | 12.056 | 25448029 | 95.33  | 830920 |



### HPLC spectra of product **3g**

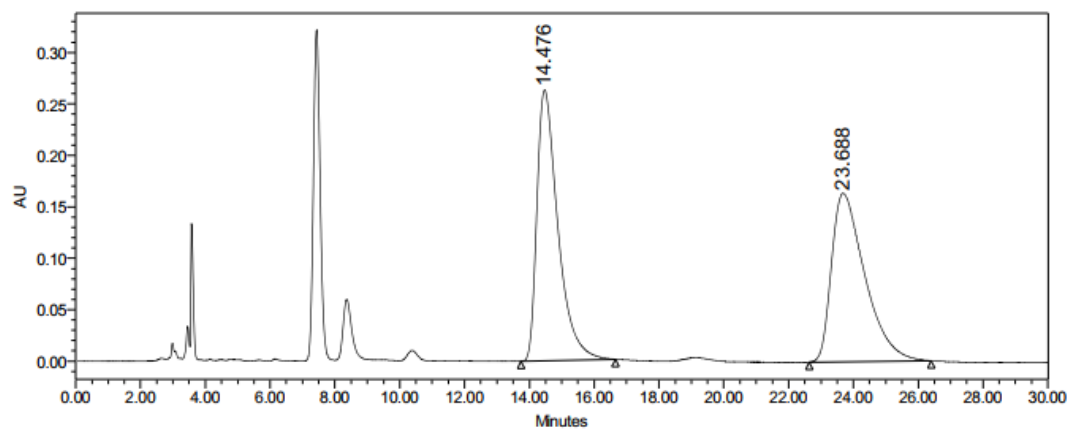

Channel: 2998; Processed Channel: 2998 PDA 220.0 nm (2998 (210-400)nm); Result Id: 2442;  
Processing Method: Asy4OMe

**Processed Channel Descr.: 2998 PDA 220.0 nm (2998 (210-400)nm)**

|   | Processed Channel Descr.             | RT     | Area     | % Area | Height |
|---|--------------------------------------|--------|----------|--------|--------|
| 1 | 2998 PDA 220.0 nm (2998 (210-400)nm) | 14.476 | 11833702 | 50.24  | 263277 |
| 2 | 2998 PDA 220.0 nm (2998 (210-400)nm) | 23.688 | 11720884 | 49.76  | 163645 |

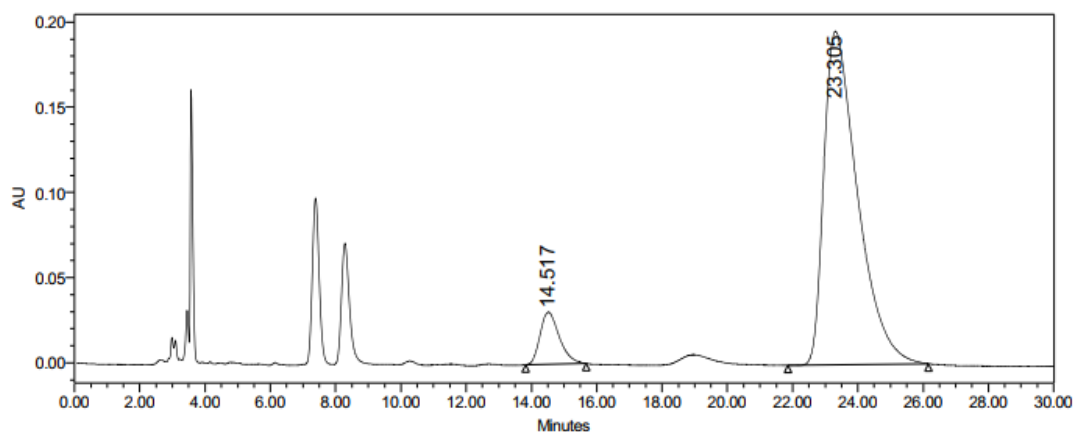

Channel: 2998; Processed Channel: 2998 PDA 220.0 nm (2998 (210-400)nm); Result Id: 2445;  
Processing Method: hh

**Processed Channel Descr.: 2998 PDA 220.0 nm (2998 (210-400)nm)**

|   | Processed Channel Descr.             | RT     | Area     | % Area | Height |
|---|--------------------------------------|--------|----------|--------|--------|
| 1 | 2998 PDA 220.0 nm (2998 (210-400)nm) | 14.517 | 1251604  | 8.18   | 30680  |
| 2 | 2998 PDA 220.0 nm (2998 (210-400)nm) | 23.305 | 14053631 | 91.82  | 195774 |

HPLC spectra of product **3h** using AD-H column

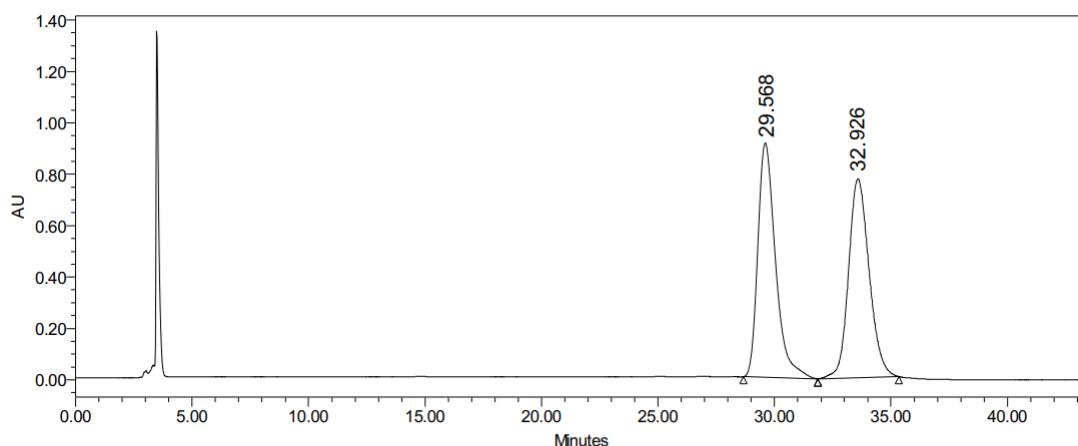

Channel: 2998; Processed Channel: 2998 PDA 220.0 nm (2998 (210-400)nm); Result Id: 1644  
Processing Method: mas

**Processed Channel Descr.: 2998 PDA 220.0 nm (2998 (210-400)nm)**

|   | Processed Channel Descr.             | RT     | Area    | % Area | Height |
|---|--------------------------------------|--------|---------|--------|--------|
| 1 | 2998 PDA 220.0 nm (2998 (210-400)nm) | 29.568 | 3583208 | 50.29  | 80750  |
| 2 | 2998 PDA 220.0 nm (2998 (210-400)nm) | 32.926 | 3542156 | 49.71  | 68507  |

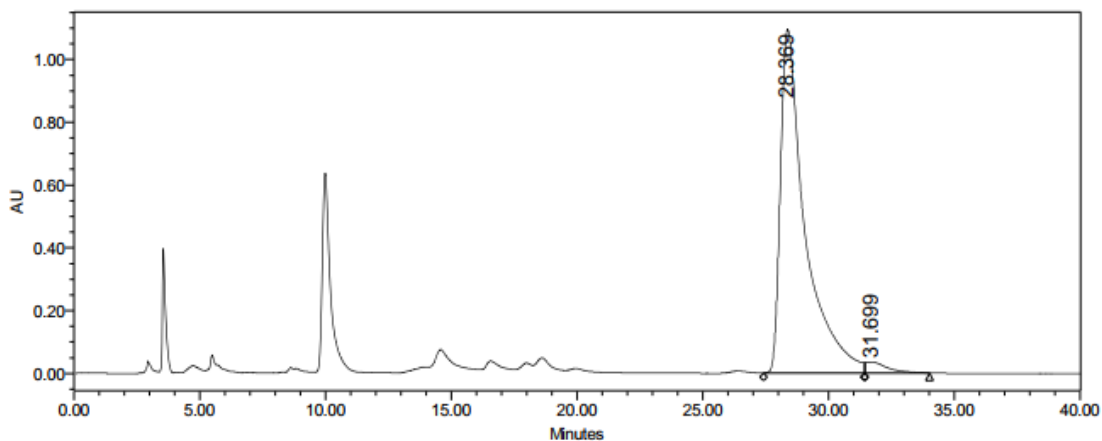

Channel: 2998; Processed Channel: 2998 PDA 219.0 nm (2998 (210-400)nm); Result Id: 2127;  
Processing Method: AsyMe

**Processed Channel Descr.: 2998 PDA 219.0 nm (2998 (210-400)nm)**

|   | Processed Channel Descr.             | RT     | Area     | % Area | Height  |
|---|--------------------------------------|--------|----------|--------|---------|
| 1 | 2998 PDA 219.0 nm (2998 (210-400)nm) | 28.369 | 74359735 | 97.23  | 1095390 |
| 2 | 2998 PDA 219.0 nm (2998 (210-400)nm) | 31.699 | 2119327  | 2.77   | 34672   |

### HPLC spectra of compound **3h** using ID column

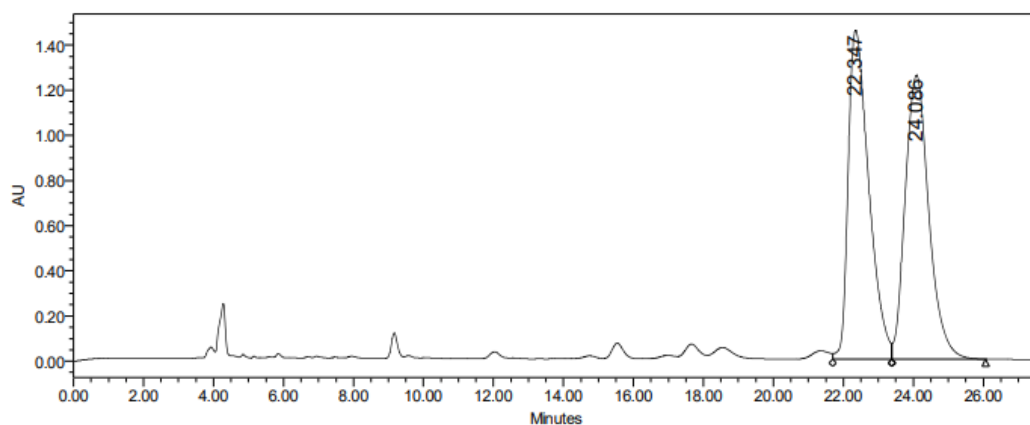

Channel: 2998; Processed Channel: 2998 PDA 220.0 nm (2998 (210-400)nm); Result Id: 1600;  
Processing Method: masphosphate rac

#### Processed Channel Descr.: 2998 PDA 220.0 nm (2998 (210-400)nm)

|   | Processed Channel Descr.             | RT     | Area     | % Area | Height  |
|---|--------------------------------------|--------|----------|--------|---------|
| 1 | 2998 PDA 220.0 nm (2998 (210-400)nm) | 22.347 | 59683920 | 50.23  | 1454927 |
| 2 | 2998 PDA 220.0 nm (2998 (210-400)nm) | 24.086 | 59143984 | 49.77  | 1256584 |

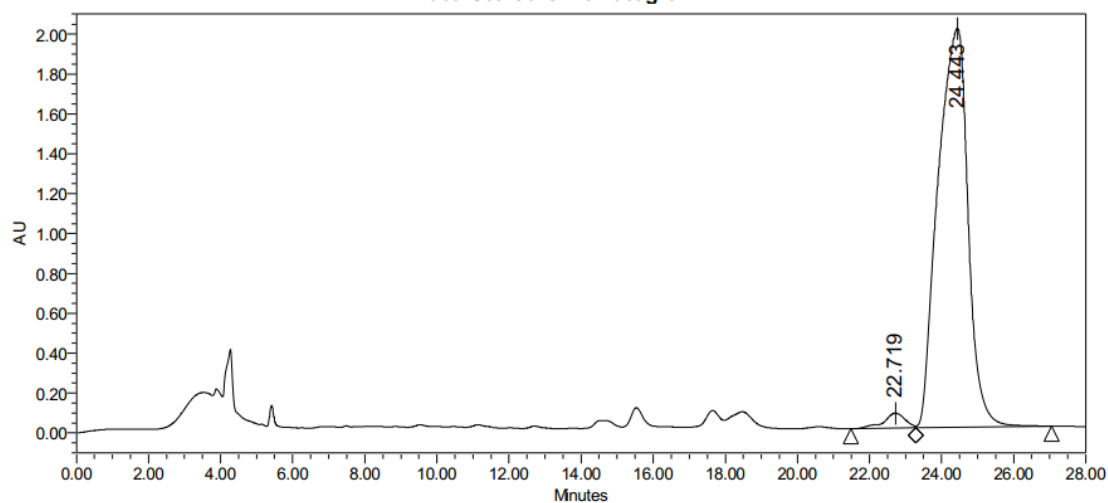

#### Peak Results

|   | Name | RT     | Area      | Height  | % Area |
|---|------|--------|-----------|---------|--------|
| 1 |      | 22.719 | 3202468   | 76248   | 2.70   |
| 2 |      | 24.443 | 115193292 | 1999539 | 97.30  |

### HPLC spectra of product 3i

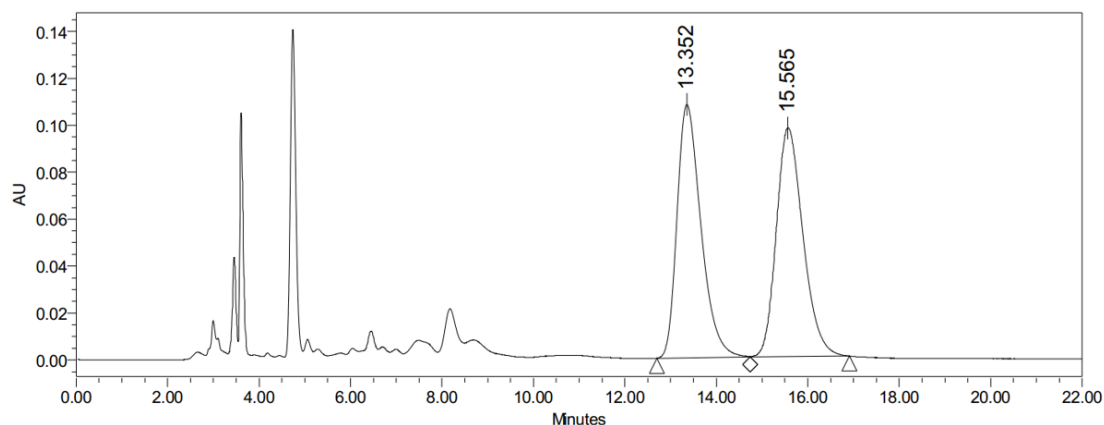

**Processed Channel Descr.: 2998 PDA 220.0 nm (2998 (210-400)nm)**

|   | Processed Channel Descr.             | RT     | Area    | % Area | Height |
|---|--------------------------------------|--------|---------|--------|--------|
| 1 | 2998 PDA 220.0 nm (2998 (210-400)nm) | 13.352 | 3939079 | 49.89  | 107991 |
| 2 | 2998 PDA 220.0 nm (2998 (210-400)nm) | 15.565 | 3955715 | 50.11  | 97592  |

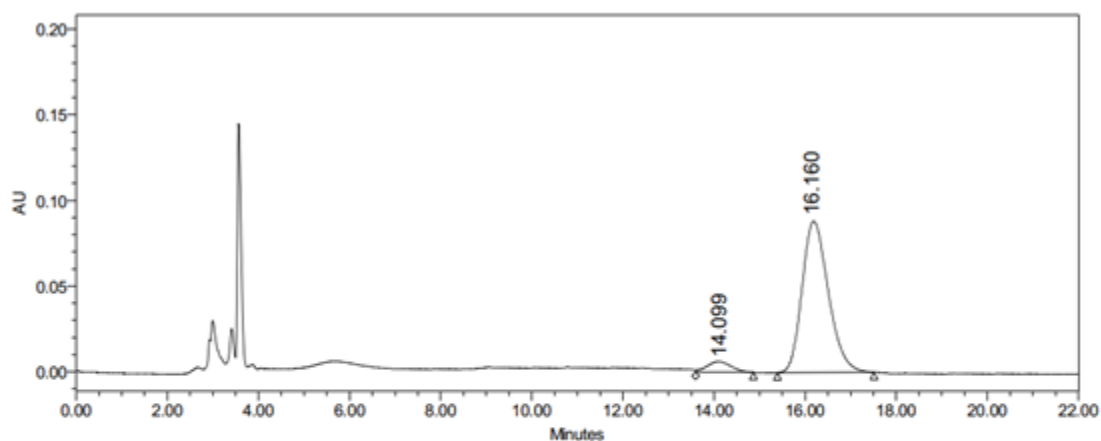

Channel: 2998; Processed Channel: 2998 PDA 220.0 nm (2998 (210-400)nm); Result Id: 2415; Processing Method: Ch

**Processed Channel Descr.: 2998 PDA 220.0 nm (2998 (210-400)nm)**

|   | Processed Channel Descr.             | RT     | Area     | % Area | Height |
|---|--------------------------------------|--------|----------|--------|--------|
| 1 | 2998 PDA 220.0 nm (2998 (210-400)nm) | 14.099 | 970623   | 5.86   | 47120  |
| 2 | 2998 PDA 220.0 nm (2998 (210-400)nm) | 16.160 | 15601853 | 94.14  | 348202 |

### HPLC spectra of product 3j

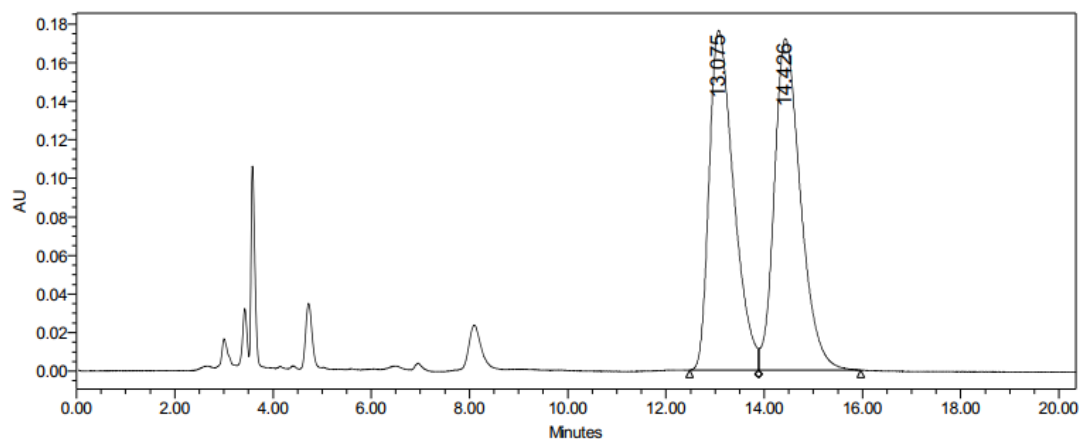

**Processed Channel Descr.: 2998 PDA 220.0 nm (2998 (210-400)nm)**

|   | Processed Channel Descr.             | RT     | Area    | % Area | Height |
|---|--------------------------------------|--------|---------|--------|--------|
| 1 | 2998 PDA 220.0 nm (2998 (210-400)nm) | 13.075 | 6103548 | 48.80  | 176163 |
| 2 | 2998 PDA 220.0 nm (2998 (210-400)nm) | 14.426 | 6402468 | 51.20  | 171964 |

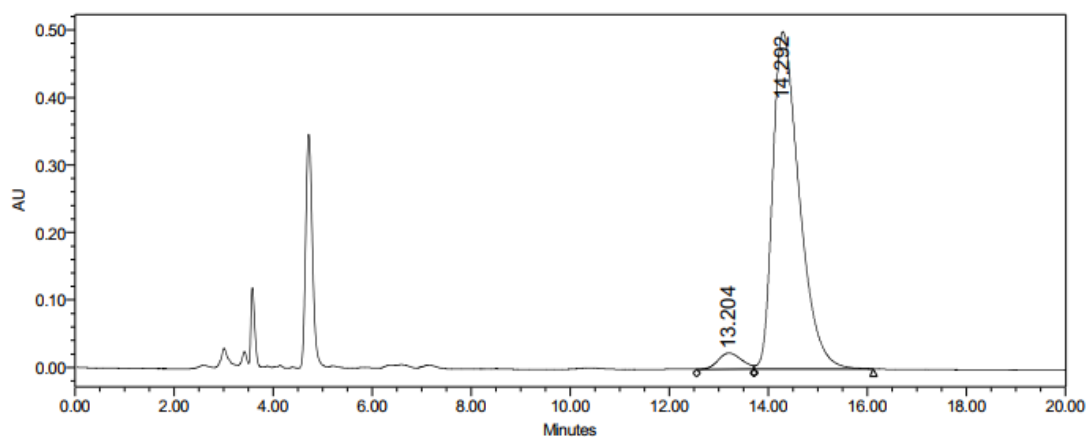

**Processed Channel Descr.: 2998 PDA 220.0 nm (2998 (210-400)nm)**

|   | Processed Channel Descr.             | RT     | Area     | % Area | Height |
|---|--------------------------------------|--------|----------|--------|--------|
| 1 | 2998 PDA 220.0 nm (2998 (210-400)nm) | 13.204 | 790793   | 4.09   | 23889  |
| 2 | 2998 PDA 220.0 nm (2998 (210-400)nm) | 14.292 | 18543935 | 95.91  | 500030 |

### HPLC spectra of product 3k

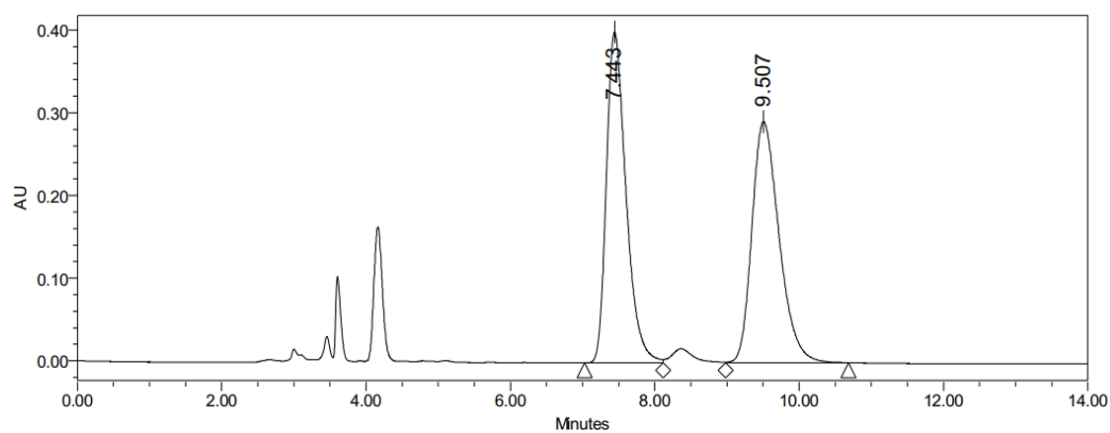

Processed Channel Descr.: 2998 PDA 220.0 nm (2998 (210-400)nm)

|   | Processed Channel Descr.             | RT    | Area    | % Area | Height |
|---|--------------------------------------|-------|---------|--------|--------|
| 1 | 2998 PDA 220.0 nm (2998 (210-400)nm) | 7.443 | 7547935 | 49.80  | 400171 |
| 2 | 2998 PDA 220.0 nm (2998 (210-400)nm) | 9.507 | 7607255 | 50.20  | 291748 |

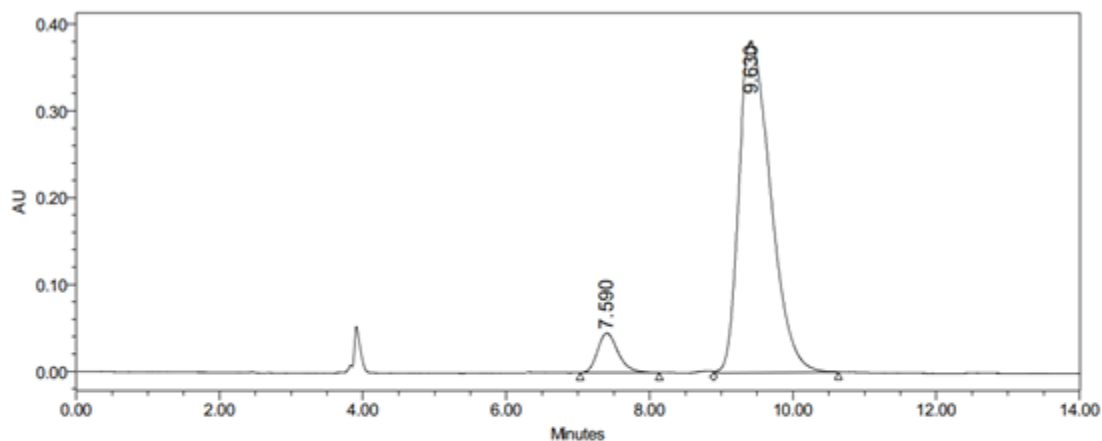

Channel: 2998; Processed Channel: 2998 PDA 220.0 nm (2998 (210-400)nm); Result Id: 2486; Processing Method: a

Processed Channel Descr.: 2998 PDA 220.0 nm (2998 (210-400)nm)

|   | Processed Channel Descr.             | RT    | Area     | % Area | Height  |
|---|--------------------------------------|-------|----------|--------|---------|
| 1 | 2998 PDA 220.0 nm (2998 (210-400)nm) | 7.590 | 5929891  | 6.82   | 318695  |
| 2 | 2998 PDA 220.0 nm (2998 (210-400)nm) | 9.630 | 81013355 | 93.18  | 1998778 |

### HPLC spectra of product 31

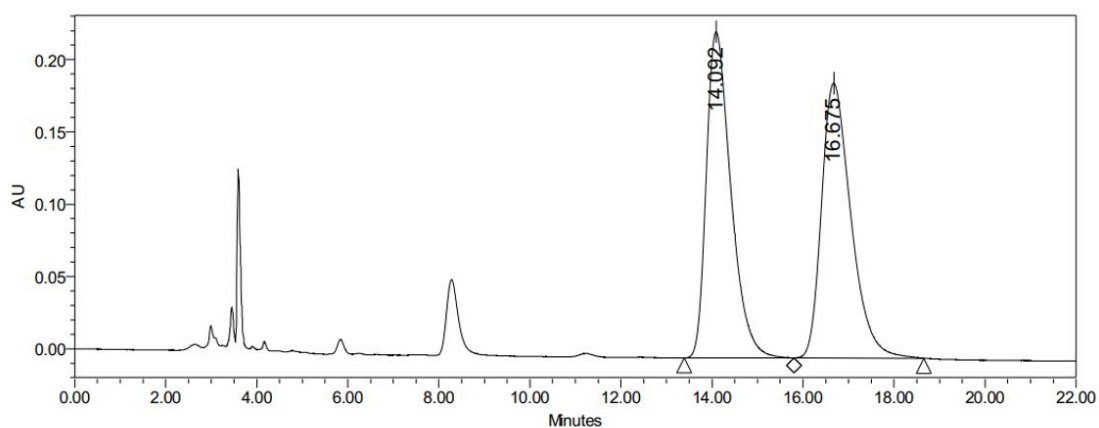

**Processed Channel Descr.: 2998 PDA 220.0 nm (2998 (210-400)nm)**

|   | Processed Channel Descr.             | RT     | Area    | % Area | Height |
|---|--------------------------------------|--------|---------|--------|--------|
| 1 | 2998 PDA 220.0 nm (2998 (210-400)nm) | 14.092 | 8480662 | 49.79  | 225656 |
| 2 | 2998 PDA 220.0 nm (2998 (210-400)nm) | 16.675 | 8553659 | 50.21  | 190247 |

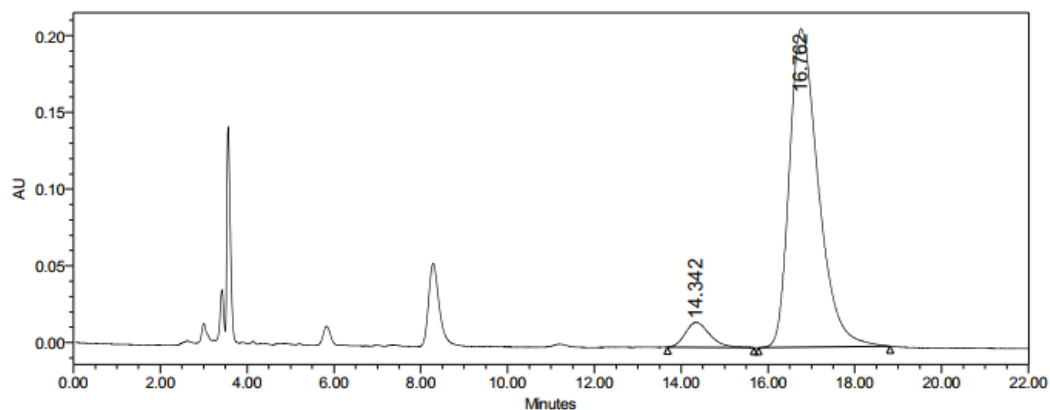

Channel: 2998; Processed Channel: 2998 PDA 220.0 nm (2998 (210-400)nm); Result Id: 2466; Processing Method: aa

**Processed Channel Descr.: 2998 PDA 220.0 nm (2998 (210-400)nm)**

|   | Processed Channel Descr.             | RT     | Area    | % Area | Height |
|---|--------------------------------------|--------|---------|--------|--------|
| 1 | 2998 PDA 220.0 nm (2998 (210-400)nm) | 14.342 | 635782  | 6.21   | 16209  |
| 2 | 2998 PDA 220.0 nm (2998 (210-400)nm) | 16.762 | 9594148 | 93.79  | 207449 |

### HPLC spectra of product 3m

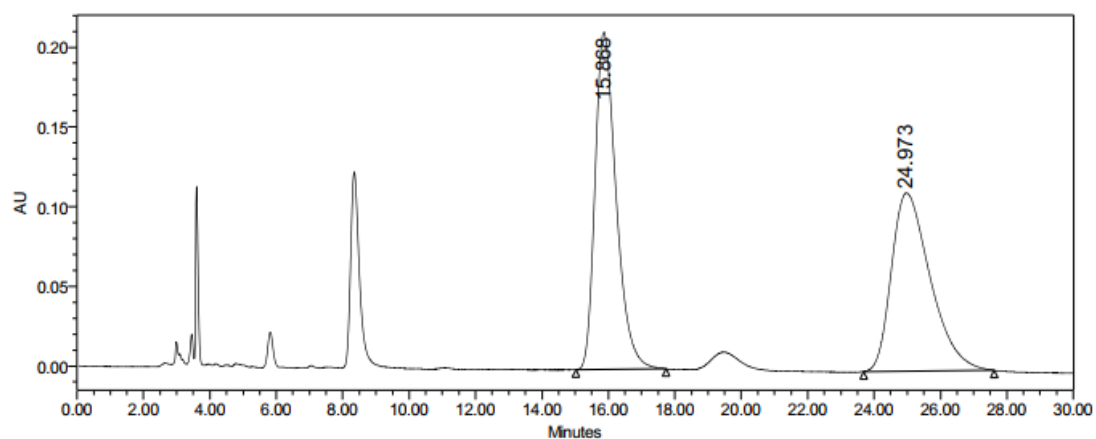

Channel: 2998; Processed Channel: 2998 PDA 220.0 nm (2998 (210-400)nm); Result Id: 2454; Processing Method: kk

#### Processed Channel Descr.: 2998 PDA 220.0 nm (2998 (210-400)nm)

|   | Processed Channel Descr.             | RT     | Area    | % Area | Height |
|---|--------------------------------------|--------|---------|--------|--------|
| 1 | 2998 PDA 220.0 nm (2998 (210-400)nm) | 15.868 | 9324781 | 50.61  | 211628 |
| 2 | 2998 PDA 220.0 nm (2998 (210-400)nm) | 24.973 | 9099145 | 49.39  |        |

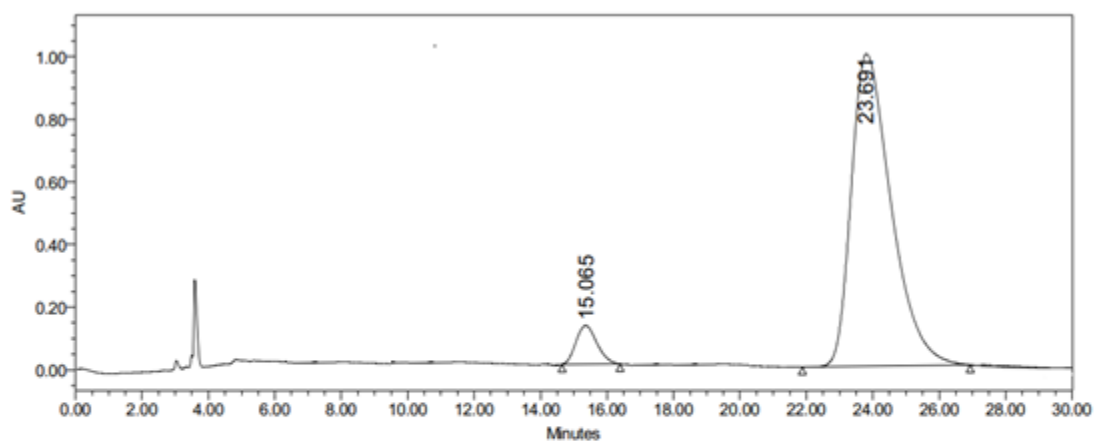

Channel: 2998; Processed Channel: 2998 PDA 220.0 nm (2998 (210-400)nm); Result Id: 4220; Processing Method: 000

#### Processed Channel Descr.: 2998 PDA 220.0 nm (2998 (210-400)nm)

|   | Processed Channel Descr.             | RT     | Area     | % Area | Height |
|---|--------------------------------------|--------|----------|--------|--------|
| 1 | 2998 PDA 220.0 nm (2998 (210-400)nm) | 15.065 | 2287091  | 6.14   | 41283  |
| 2 | 2998 PDA 220.0 nm (2998 (210-400)nm) | 23.691 | 34987844 | 93.86  | 436128 |



## HPLC spectra of product **3n**

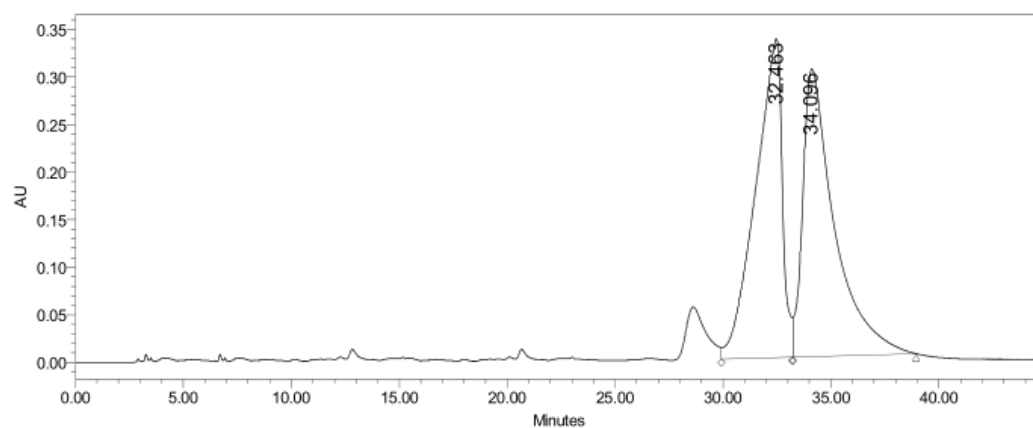

Channel: 2998 Ch1 254nm@4.8nm; Processed Channel: 2998 Ch1 254nm@4.8nm; Result Id: 2321;  
Processing Method: Ali

### Processed Channel Descr.: 2998 Ch1 254nm@4.8nm

|   | Processed Channel Descr. | RT     | Area     | % Area | Height |
|---|--------------------------|--------|----------|--------|--------|
| 1 | 2998 Ch1 254nm@4.8nm     | 32.463 | 28549353 | 48.01  | 335230 |
| 2 | 2998 Ch1 254nm@4.8nm     | 34.096 | 30913235 | 51.99  | 302338 |

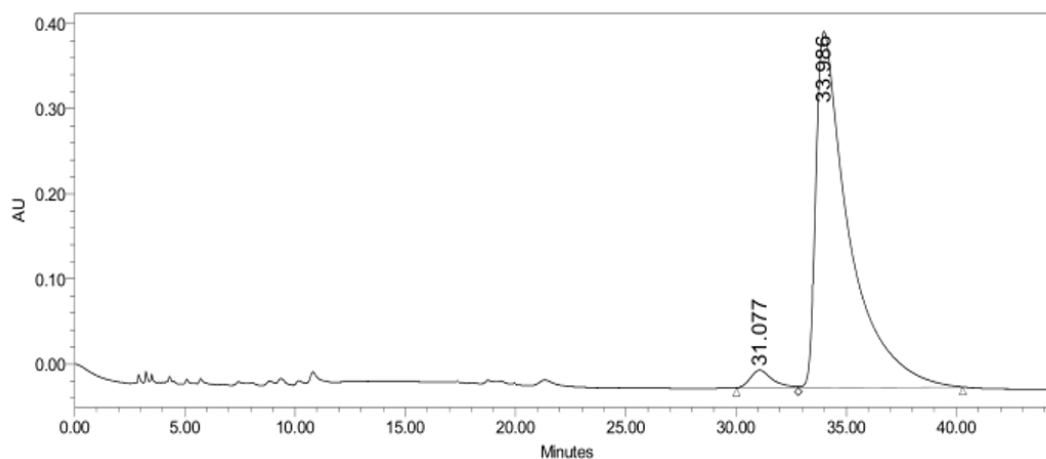

Channel: 2998 Ch1 254nm@4.8nm; Processed Channel: 2998 Ch1 254nm@4.8nm; Result Id: 2323;  
Processing Method: Ali

### Processed Channel Descr.: 2998 Ch1 254nm@4.8nm

|   | Processed Channel Descr. | RT     | Area     | % Area | Height |
|---|--------------------------|--------|----------|--------|--------|
| 1 | 2998 Ch1 254nm@4.8nm     | 31.077 | 1433574  | 3.18   | 20775  |
| 2 | 2998 Ch1 254nm@4.8nm     | 33.986 | 43597691 | 96.82  | 418391 |

# HPLC Spectra of Products 4a-4h

## HPLC spectra of product 4a

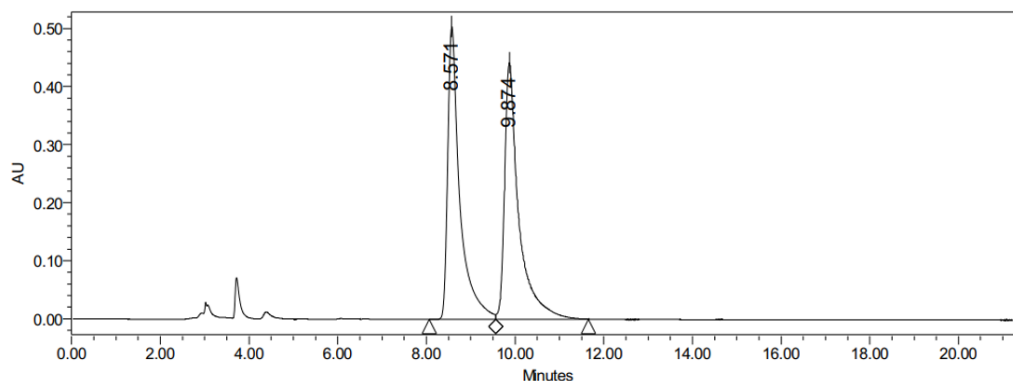

|   | RT    | Area    | % Area | Height |
|---|-------|---------|--------|--------|
| 1 | 8.571 | 9551848 | 49.53  | 504031 |
| 2 | 9.874 | 9734368 | 50.47  | 441594 |

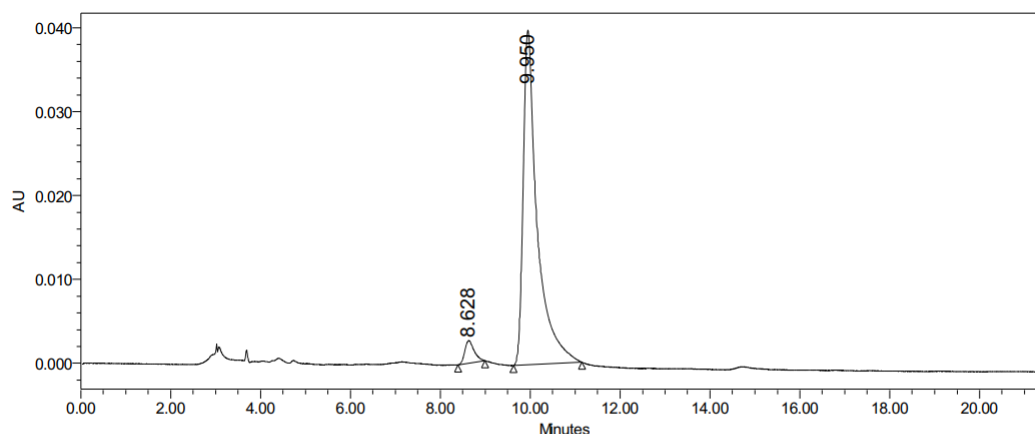

Channel: 2998; Processed Channel: 2998 PDA 254.0 nm (2998 (210-400)nm); Injection: 1; Date Acquired: 7/4/2022 9:37:37 PM CST; Result Id: 3135; Processing Method: 33

### Peak Name:

|   | Injection | RT    | Area   | % Area | Height |
|---|-----------|-------|--------|--------|--------|
| 1 | 1         | 9.950 | 868688 | 95.63  | 39906  |
| 2 | 1         | 8.628 | 39706  | 4.37   | 2727   |

## HPLC spectra of product 4b

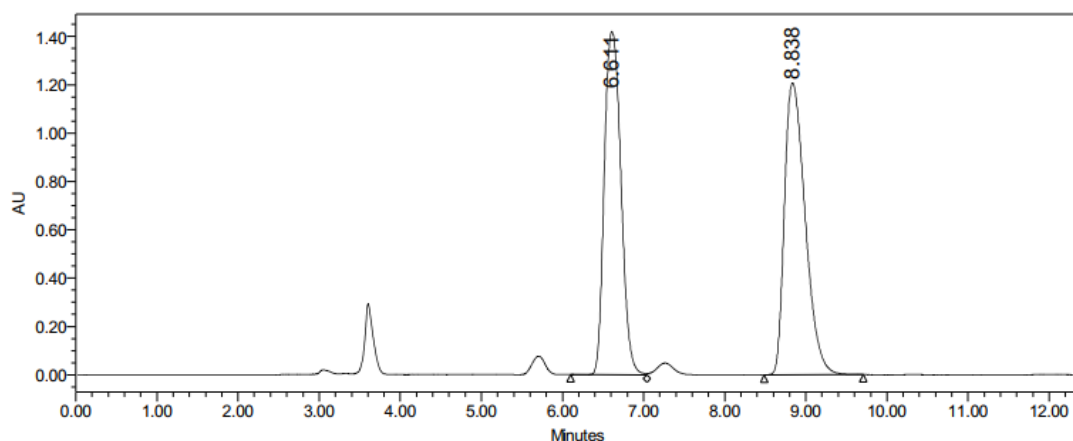

### Processed Channel Descr.: 2998 PDA 220.0 nm (2998 (210-400)nm)

|   | Processed Channel Descr.             | RT    | Area     | % Area | Height  |
|---|--------------------------------------|-------|----------|--------|---------|
| 1 | 2998 PDA 220.0 nm (2998 (210-400)nm) | 6.611 | 20229838 | 48.55  | 1420219 |
| 2 | 2998 PDA 220.0 nm (2998 (210-400)nm) | 8.838 | 21436106 | 51.45  | 1207327 |

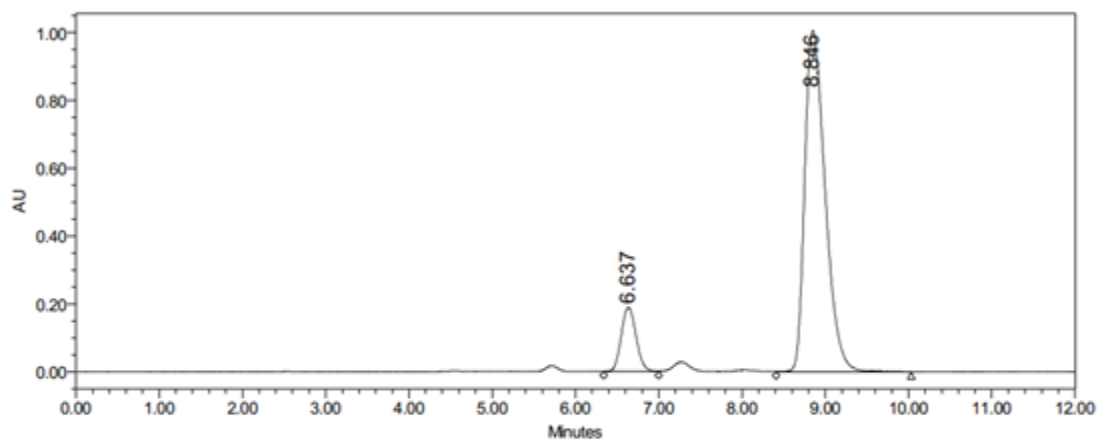

### Processed Channel Descr.: 2998 PDA 220.0 nm (2998 (210-400)nm)

|   | Processed Channel Descr.             | RT    | Area     | % Area | Height  |
|---|--------------------------------------|-------|----------|--------|---------|
| 1 | 2998 PDA 220.0 nm (2998 (210-400)nm) | 6.637 | 2353526  | 12.07  | 189457  |
| 2 | 2998 PDA 220.0 nm (2998 (210-400)nm) | 8.846 | 17151678 | 87.93  | 1005553 |

### HPLC spectra of product 4c

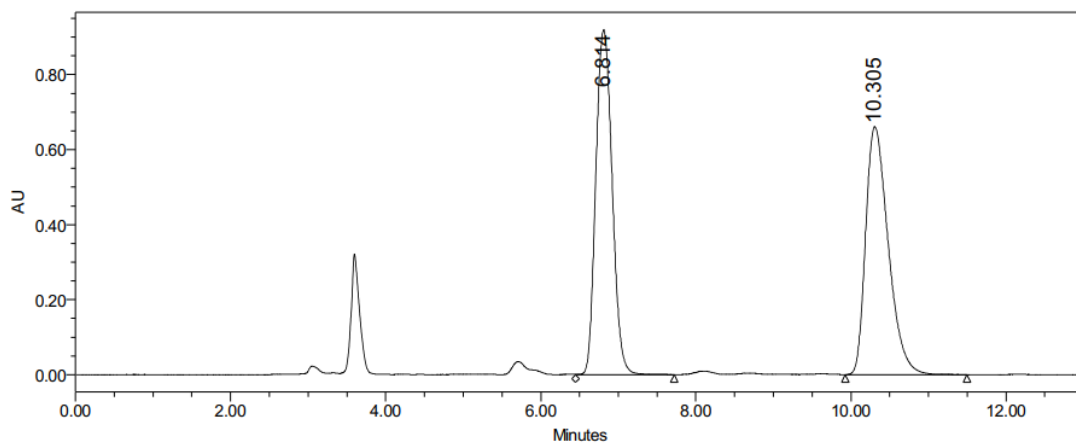

**Processed Channel Descr.: 2998 PDA 220.0 nm (2998 (210-400)nm)**

|   | Processed Channel Descr.             | RT     | Area     | % Area | Height |
|---|--------------------------------------|--------|----------|--------|--------|
| 1 | 2998 PDA 220.0 nm (2998 (210-400)nm) | 6.814  | 13473081 | 50.08  | 919554 |
| 2 | 2998 PDA 220.0 nm (2998 (210-400)nm) | 10.305 | 13432436 | 49.92  | 661322 |

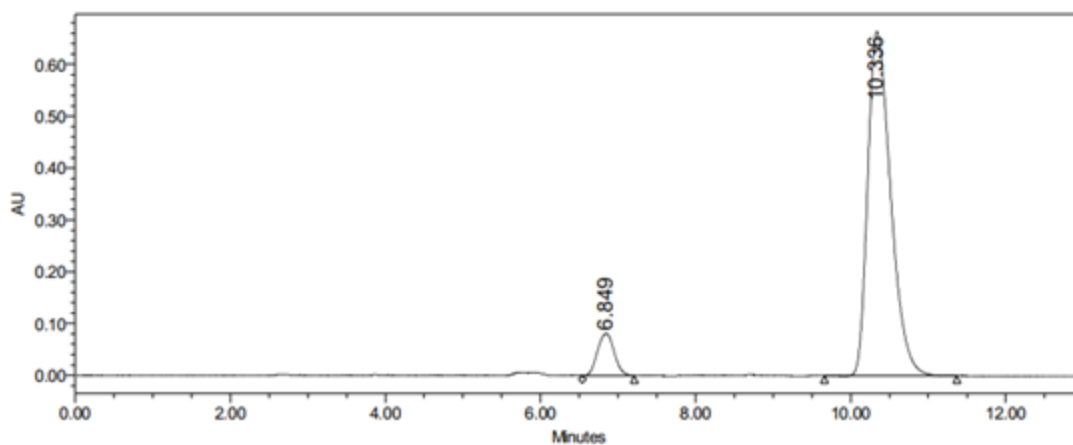

**Processed Channel Descr.: 2998 PDA 220.0 nm (2998 (210-400)nm)**

|   | Processed Channel Descr.             | RT     | Area     | % Area | Height |
|---|--------------------------------------|--------|----------|--------|--------|
| 1 | 2998 PDA 220.0 nm (2998 (210-400)nm) | 6.849  | 1215998  | 8.16   | 81277  |
| 2 | 2998 PDA 220.0 nm (2998 (210-400)nm) | 10.336 | 13694813 | 91.84  | 664318 |

## HPLC spectra of product 4d

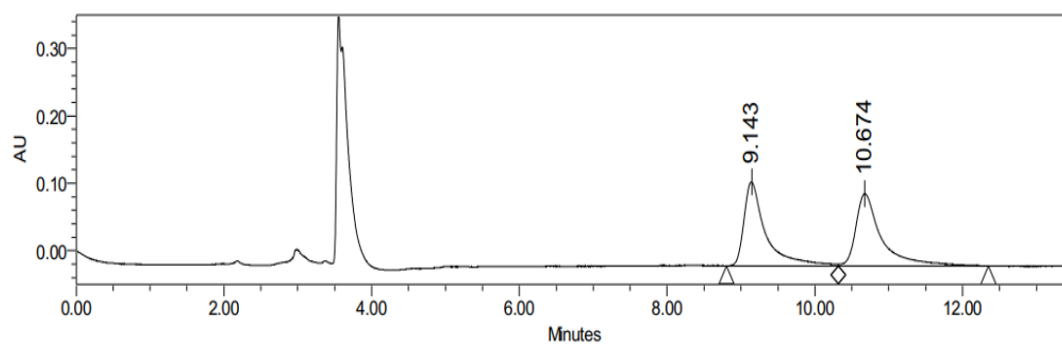

Processed Channel Descr.: 2998 PDA 220.0 nm (2998 (210-400)nm)

|   | Processed Channel Descr.             | RT     | Area    | % Area | Height |
|---|--------------------------------------|--------|---------|--------|--------|
| 1 | 2998 PDA 220.0 nm (2998 (210-400)nm) | 9.143  | 2551100 | 49.62  | 124583 |
| 2 | 2998 PDA 220.0 nm (2998 (210-400)nm) | 10.674 | 2590564 | 50.38  | 107349 |

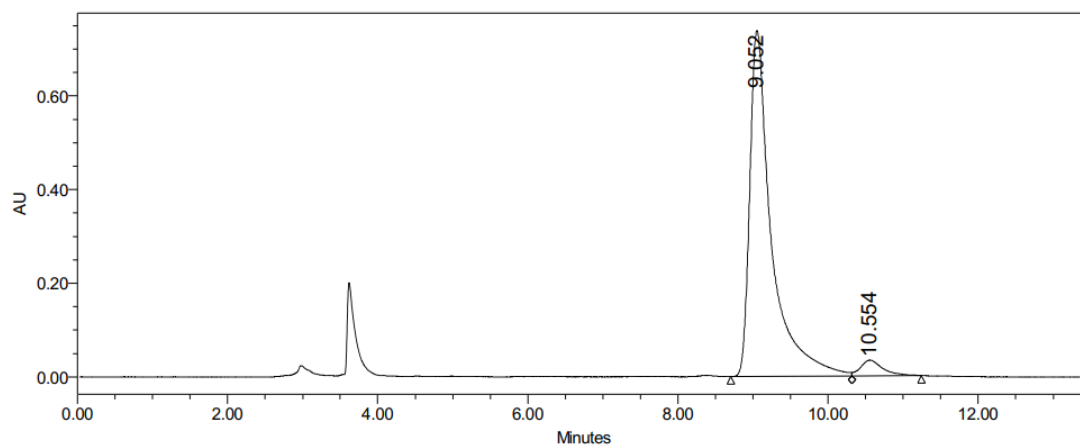

Channel: 2998; Processed Channel: 2998 PDA 220.0 nm (2998 (210-400)nm); Result Id: 4115; Processing Method: 00

Processed Channel Descr.: 2998 PDA 220.0 nm (2998 (210-400)nm)

|   | Processed Channel Descr.             | RT     | Area     | % Area | Height |
|---|--------------------------------------|--------|----------|--------|--------|
| 1 | 2998 PDA 220.0 nm (2998 (210-400)nm) | 9.052  | 14799866 | 95.50  | 738716 |
| 2 | 2998 PDA 220.0 nm (2998 (210-400)nm) | 10.554 | 696940   | 4.50   | 33875  |

### HPLC spectra of product 4e

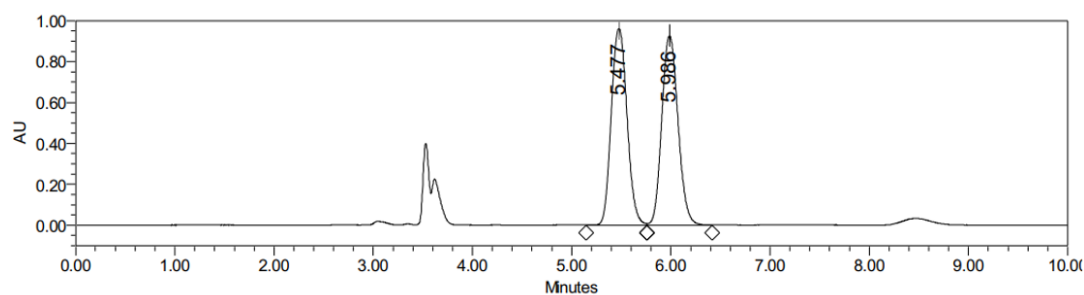

Processed Channel Descr.: 2998 PDA 220.0 nm (2998 (210-400)nm)

|   | Processed Channel Descr.             | RT    | Area     | % Area | Height |
|---|--------------------------------------|-------|----------|--------|--------|
| 1 | 2998 PDA 220.0 nm (2998 (210-400)nm) | 5.477 | 10579456 | 50.06  | 962785 |
| 2 | 2998 PDA 220.0 nm (2998 (210-400)nm) | 5.986 | 10554106 | 49.94  | 927889 |

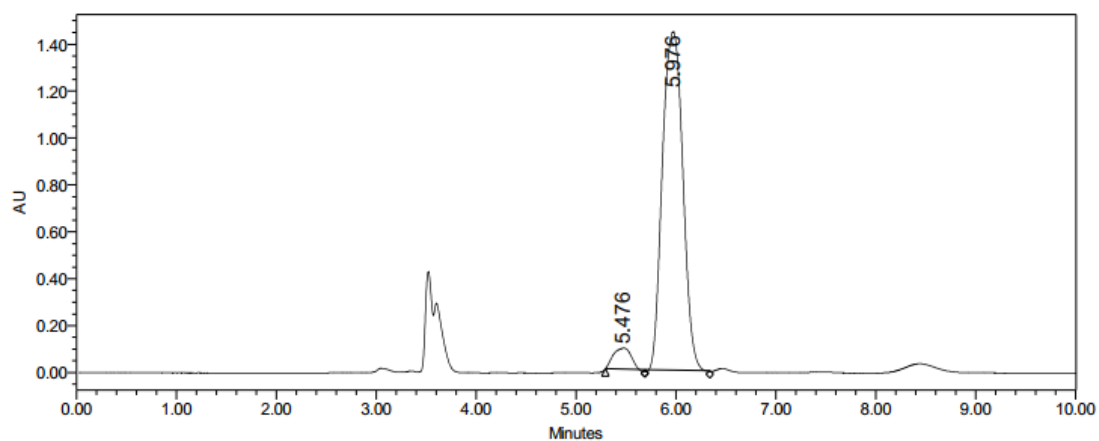

Channel: 2998; Processed Channel: 2998 PDA 220.0 nm (2998 (210-400)nm); Result Id: 3969; Processing Method: 00

Processed Channel Descr.: 2998 PDA 220.0 nm (2998 (210-400)nm)

|   | Processed Channel Descr.             | RT    | Area     | % Area | Height  |
|---|--------------------------------------|-------|----------|--------|---------|
| 1 | 2998 PDA 220.0 nm (2998 (210-400)nm) | 5.476 | 1127343  | 5.22   | 89204   |
| 2 | 2998 PDA 220.0 nm (2998 (210-400)nm) | 5.976 | 20487599 | 94.78  | 1441935 |

### HPLC spectra of product 4f

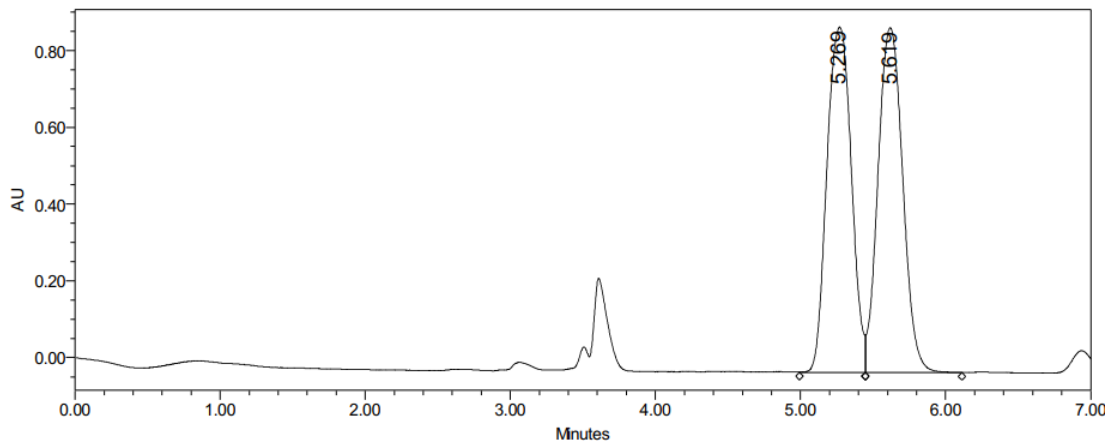

**Processed Channel Descr.: 2998 PDA 220.0 nm (2998 (210-400)nm)**

|   | Processed Channel Descr.             | RT    | Area     | % Area | Height |
|---|--------------------------------------|-------|----------|--------|--------|
| 1 | 2998 PDA 220.0 nm (2998 (210-400)nm) | 5.269 | 10519086 | 49.59  | 900048 |
| 2 | 2998 PDA 220.0 nm (2998 (210-400)nm) | 5.619 | 10691172 | 50.41  | 898349 |

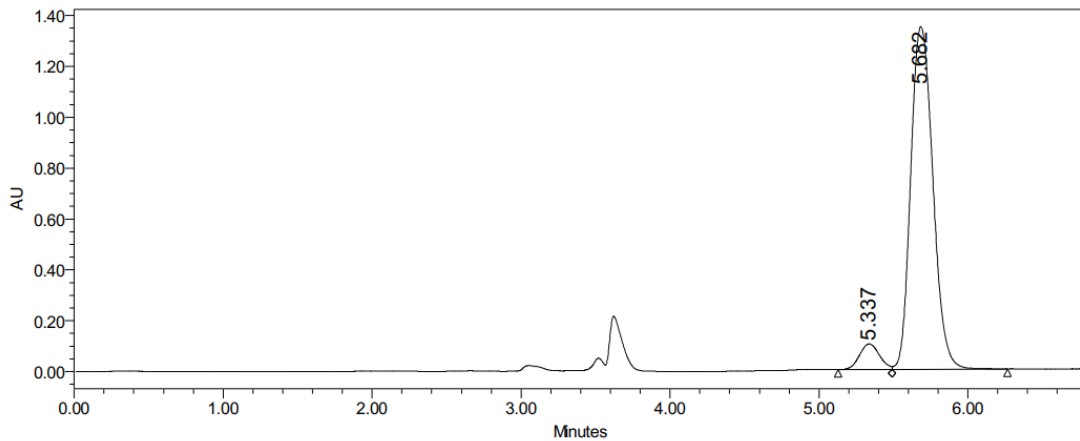

**Processed Channel Descr.: 2998 PDA 220.0 nm (2998 (210-400)nm)**

|   | Processed Channel Descr.             | RT    | Area     | % Area | Height  |
|---|--------------------------------------|-------|----------|--------|---------|
| 1 | 2998 PDA 220.0 nm (2998 (210-400)nm) | 5.337 | 932542   | 6.29   | 100366  |
| 2 | 2998 PDA 220.0 nm (2998 (210-400)nm) | 5.682 | 13902446 | 93.71  | 1346261 |

HPLC spectra of product **4g**

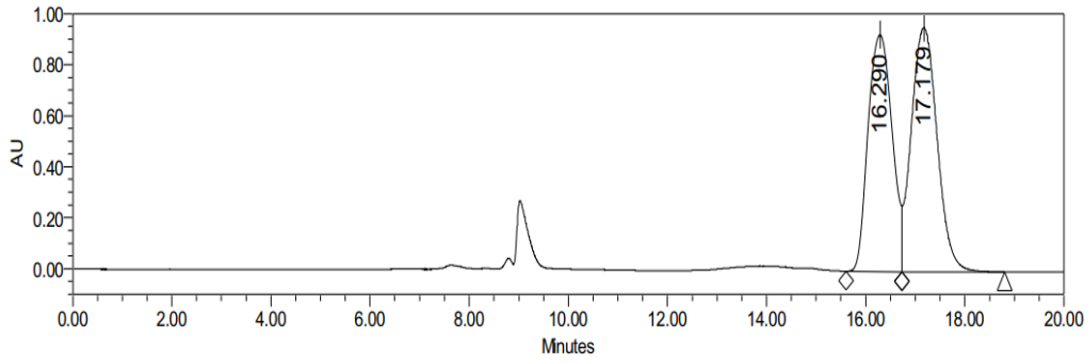

**Processed Channel Descr.: 2998 PDA 220.0 nm (2998 (210-400)nm)**

|   | Processed Channel Descr.             | RT     | Area     | % Area | Height |
|---|--------------------------------------|--------|----------|--------|--------|
| 1 | 2998 PDA 220.0 nm (2998 (210-400)nm) | 16.290 | 31314417 | 47.49  | 928590 |
| 2 | 2998 PDA 220.0 nm (2998 (210-400)nm) | 17.179 | 34629161 | 52.51  | 957340 |

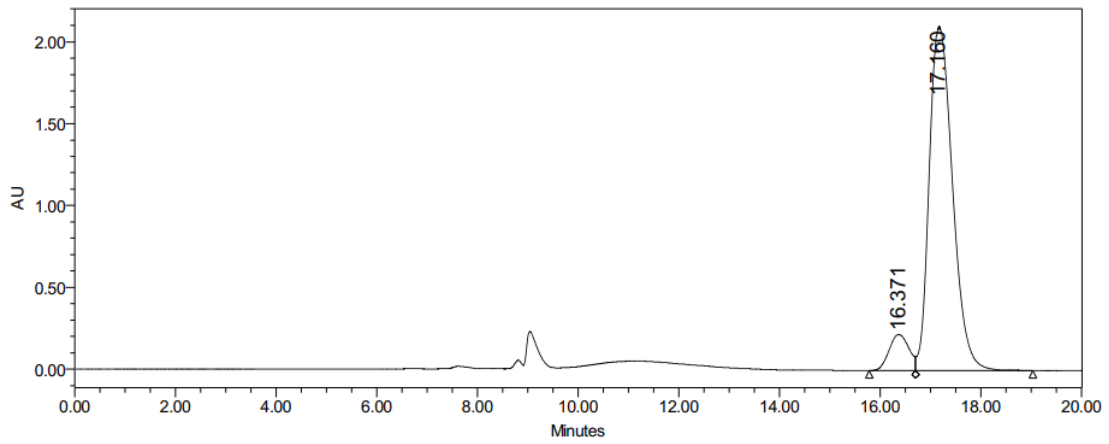

Channel: 2998; Processed Channel: 2998 PDA 220.0 nm (2998 (210-400)nm); Result Id: 4078;  
Processing Method: 000

**Processed Channel Descr.: 2998 PDA 220.0 nm (2998 (210-400)nm)**

|   | Processed Channel Descr.             | RT     | Area     | % Area | Height  |
|---|--------------------------------------|--------|----------|--------|---------|
| 1 | 2998 PDA 220.0 nm (2998 (210-400)nm) | 16.371 | 6031296  | 8.18   | 220154  |
| 2 | 2998 PDA 220.0 nm (2998 (210-400)nm) | 17.160 | 67728828 | 91.82  | 2104048 |

HPLC spectra of product **4h**



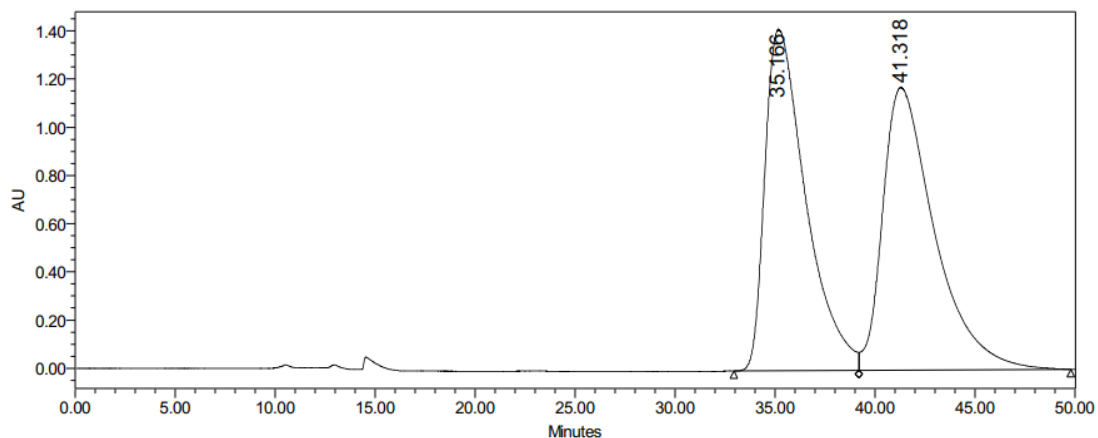

Channel: 2998; Processed Channel: 2998 PDA 220.0 nm (2998 (210-400)nm); Result Id: 4167;  
Processing Method: 000

**Processed Channel Descr.: 2998 PDA 220.0 nm (2998 (210-400)nm)**

|   | Processed Channel Descr.             | RT     | Area      | % Area | Height  |
|---|--------------------------------------|--------|-----------|--------|---------|
| 1 | 2998 PDA 220.0 nm (2998 (210-400)nm) | 35.166 | 201358830 | 48.79  | 1417620 |
| 2 | 2998 PDA 220.0 nm (2998 (210-400)nm) | 41.318 | 211358477 | 51.21  | 1173738 |

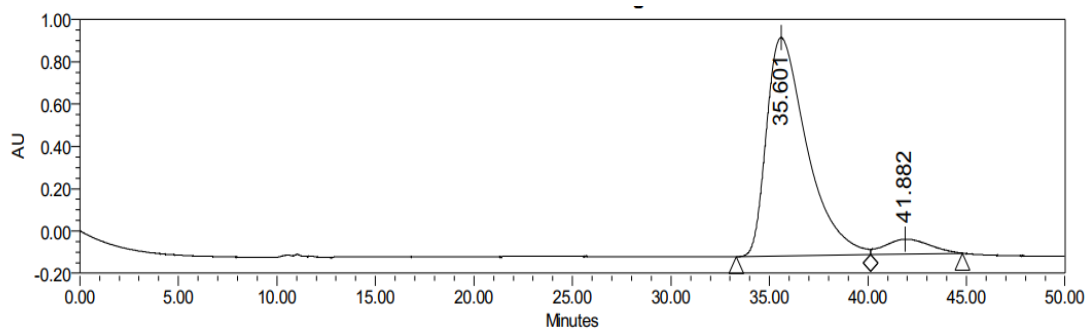

**Peak Results**

| Name | RT     | Area      | Height  | % Area |
|------|--------|-----------|---------|--------|
| 1    | 35.601 | 147431523 | 1033980 | 92.91  |
| 2    | 41.882 | 11245692  | 71091   | 7.09   |

*References*

- 1 D. A. Evans, J. S. Johnson and E. J. Olhava, *J. Am. Chem. Soc.*, 2000, **122**, 1635–1649.
- 2 S. R. Smith, S. M. Leckie, R. Holmes, J. Douglas, C. Fallan, P. Shapland, D. Pryde, A. M. Z. Slawin and A. D. Smith, *Org. Lett.*, 2014, **16**, 2506–2509.
- 3 J. K. Kozlowski, N. P. Rath and C. D. Spilling, *Tetrahedron*, 1995, **51**, 6385–6396.
